# Supplementary material for: Proteome-wide identification of mycobacterial pupylation targets
Source: PubMed Central journal article supplement — Mol Syst Biol. 2010 Jul 13;6:386. doi: 10.1038/msb.2010.39 (PMC2925521; doi:10.1038/msb.2010.39), 2010-07-13
Supplement: msb201039-s2.pdf [file msb201039-s2.pdf]

# Proteome-wide identification of mycobacterial pupylation targets

Christian Poulsen<sup>1\*</sup>, Yusuf Akhter<sup>1\*</sup>, Amy Hye-Won Jeon<sup>2</sup>, Gerold Schmitt-Ulms<sup>2</sup>, Helmut E. Meyer<sup>3</sup>, Anja Stefanski<sup>3</sup>, Kai Stühler<sup>3</sup>, Matthias Wilmanns<sup>1</sup>, Young-Hwa Song<sup>1</sup>

<sup>1</sup> EMBL-Hamburg, Notkestrasse 85, 22603 Hamburg, Germany

<sup>2</sup> Centre for Research in Neurodegenerative Diseases, University of Toronto, 6 Queen's Park Crescent West, Toronto, Ontario M5S3H2, Canada

<sup>3</sup> Medizinisches Proteom-Center, Ruhr Universität Bochum, Universitätsstraße 150, 44801 Bochum, Germany

\* These authors contributed equally.

Correspondence: Matthias Wilmanns

EMBL-Hamburg, Notkestrasse 85, D-22603 Hamburg,  
Germany

Phone: +49-40-89902-126

Fax: +49-40-89902-149

Email: [wilmanns@embl-hamburg.de](mailto:wilmanns@embl-hamburg.de)

Running title: Identification of mycobacterial pupylation targets

Subject categories: Microbiology & Pathogens, Proteomics

# Supplement

## Results

### PUP is a partly intrinsically unstructured protein

To provide insight into the overall structural properties of PUP, we first expressed the *M. tuberculosis* protein (Rv2111c, *mtPUP*) in *Escherichia coli* and purified it to homogeneity (**Figure 1**). *mtPUP* elutes as a single peak on a gel filtration column, with an apparent molecular weight (MW) of about 30 kDa (**Supplement Figure 4A**), considerably exceeding its calculated MW of 6.9 kDa. However, static light scattering data revealed that *mtPUP* is a monomer in solution (**Supplement Figure 4A**). The circular dichroism spectrum of PUP showed a distinct molar ellipticity minimum around 200 nm, indicating that a substantial fraction of the protein exhibits a random coil conformation. In addition, *mtPUP* showed a minimum around 226 nm, indicating limited  $\alpha$ -helical content (**Supplement Figure 4B**). The data are supported by secondary structure analysis, which predicts the N-terminal part of *mtPUP* to be unstructured and the C-terminal part to be predominantly  $\alpha$ -helical (**Supplement Figure 5**). Taken together, the data indicate that *mtPUP* is likely to have an extended, non-globular conformation with a substantial fraction of the protein in an intrinsically unfolded conformation. Our data are in agreement with recent preliminary NMR analyses of PUP (Chen *et al*, 2009; Liao *et al*, 2009). These findings may explain why, in our experience, *mtPUP* could not be crystallized (data not shown). A comparative analysis with ubiquitin reveals that the structural organization of PUP is unrelated (**Supplement Figure 4**).

## **Materials and Methods**

### **Biophysical characterization of *mtPUP***

The apparent MW and absolute MW were measured by gel filtration and SLS using a Superdex 75-10/300 column (GE Healthcare), connected to a SLS detector (miniDAWN tristar, Wyatt Technology). The system was equilibrated with 50 mM Tris-HCl (pH 8.0) and 300 mM NaCl, before injection of 1 mg *mtPUP*. Due to the low extinction coefficient of *mtPUP* at 280 nm, the SLS calculation was based on the mass of eluted protein.

For circular dichroism measurements, gel filtration-purified *mtPUP* was exchanged into PBS (50 mM phosphate (pH 7.5), 150 mM NaCl), using a PD-10 desalting column (GE Healthcare). Lyophilized bovine ubiquitin (SIGMA) was reconstituted in PBS. All circular dichroism spectra from samples were recorded at a concentration of 5  $\mu$ M using a Jasco J-810 spectrophotometer. The background spectrum of PBS was subtracted before further data analysis.

## Supplement Table Legends

**Supplement Table 1:** A, complete list of putative pupylation substrates obtained by shotgun sequencing mass spectrometry analysis; B, complete list of pupylated peptides. Column annotation: ‘% Cov’, percent coverage of combined CID spectra that underlies individual protein identifications; ‘Uniprot ID’, Uniprot database identifier; ‘ Gene locus, *M. smegmatis*’, *M. smegmatis* gene identifier (<http://cmr.jcvi.org>), *mtPUP* is denoted with the gene identifier Rv2111c ; ‘Conf’, percent value indicating confidence of assignment of given CID spectrum to matched peptide sequence; ‘Cleavages’, unconventional or missed tryptic cleavages; ‘ $\Delta$ Mass’, deviation of observed mass from calculated mass; ‘Prec MW’, inferred mass of observed precursor peptide; ‘Prec m/z’, experimentally observed mass of precursor peptide depicted as mass over charge; ‘Calc. MW’, calculated mass of peptide; ‘Calc. m/z’, inferred calculate mass of peptide depicted as mass over charge; ‘Calc. z’, inferred charge state of peptide; ‘Area 115’, peak intensity of 115.11 reporter ion, calculated by integration of area covered by peak.

**Supplement Table 2:** A, complete peptide list of putative pupylation substrates, detected by 2D gel analyses; B, complete list of pupylated peptides. Column annotation: ‘Uniprot ID’, Uniprot database identifier; ‘ Gene locus, *M. smegmatis*’, *M. smegmatis* gene identifier (<http://cmr.jcvi.org>); ‘pI (seq.)’, Isoelectric point of target sequence; ‘MW [kDa]’, molecular mass; ‘MS Cov. [%]’, coverage of single mass spectrometry experiment; ‘MS/MS Cov. [%]’, tandem mass spectrometry experiment; ‘MS/MS Mascot Score’, as defined in Matrix Science, v.2.2.0; ‘z’, charge state.

**Supplement Table 3. Gene cluster (A) and functional cluster (B) analysis of the complete target list** (*cf.* Supplement Tables 1A and 2A). For annotation, see legend Table 1. The total number of *M. tuberculosis* targets analyzed is 217, since 26 *M. smegmatis* targets are without homologues in *M. tuberculosis*.

**Supplement Table 4. Identification of the differentially expressed pupylated targets using 2D-DIGE and mass spectroscopy.** Tandem mass spectrometry analyses of spots found under all three listed experimental conditions. The intensities under experimental conditions (*cf.* Supplement Figure 3) A (*mtPUP* expression, stationary phase), B (*mtPUP* expression, log phase) and C (*mtPUP* expression under oxidative stress) have been qualitatively estimated and indicated as “+”, “++” and “+++”. The column annotations have been adapted from Table 1 and Supplement Table 3A.

### **Supplement Figure Legends**

**Supplement Figure 1. Analysis of proteins expressed in *M. smegmatis*, prior and after NiNTA purification.** A, SDS-PAGE analysis of poly-histidine tagged proteins. Lanes 1 and 2, wild-type *mtPUP* (lane 1, crude extract; lane 2, NiNTA-purified sample); lanes 3 and 4: pupylation-incompetent *mtPUP(Q64A)* (lane 3, crude extract; lane 4, NiNTA-purified sample); lanes 5 and 6: control Rv3874 (lane 5, crude extract; lane 6, NiNTA-purified sample). B and C, NiNTA-affinity purified pupylation targets from cultures under different growth conditions, using SDS-PAGE stained with Coomassie blue (panel B) and immunoblots, using an HPR-conjugate anti-His antibody (Qiagen) (panel C). Lane 1, *mtPUP* expression induced at the start of cultivation; lane 2, expression induced at 2.0 OD<sup>600</sup>; lane 3, expression induced at 4.0 OD<sup>600</sup>; lane 4, expression induced at the start of cultivation and in presence of 2 mM H<sub>2</sub>O<sub>2</sub>; lane 5, *mtPUP(Q64A)*; lane 6, Rv3874 (control). All protein samples were poly-histidine tagged.

**Supplement Figure 2. Analysis of growth phenotypes in the presence / absence of *mtPUP(wt)* under different conditions.** Bacterial growth was monitored by measuring the optical densities at 600 nm (OD<sup>600</sup>), as a function of time. Cultures were prepared in triplicate for each time point, thereby ensuring that the growth of

bacteria was not disturbed until the time of measurement. When the cell density exceeded an OD<sup>600</sup> of 1.5, the culture was diluted to allow density measurements within the linear range of the detector. Specific stress conditions were generated, by adding 2 mM H<sub>2</sub>O<sub>2</sub>, 3 mM NaNO<sub>2</sub> (pH 5.5), or 20 mM epoxomicin (Enzo Life Sciences) to the growth medium prior to inoculation.

**Supplement Figure 3. Differential pupylome pattern analysis by 2D-DIGE.**

Approximately 50 µg of CyDye labeled polyhistidine-affinity captured protein samples were analyzed. The images of three spectral channels are shown separately: A, Cy2 labeled sample from culture grown under influence of over-expression of *mtPUP* induced at 2.0 OD<sup>600</sup>; B, Cy3 labeled sample with *mtPUP* expression induced at the start of culturing; C, Cy5 labeled sample purified from a bacterial culture, supplemented with 2 mM H<sub>2</sub>O<sub>2</sub> to the medium. Selected spots with apparent differential expression levels are encircled and numbered. Apparent variations of the level of found pupylated substrates are indicated in Supplement Table 4, suggesting dynamic pupylation of substrates under different growth conditions.

**Supplement Figure 4. Biophysical analysis of *mtPUP*.** A, *mtPUP* (thick line), monitored at OD280 (left axis), elutes at an apparent molecular weight of 30 kDa from an analytical gel filtration column, which substantially differs from its calculated MW (9.6 kDa). For comparison, ubiquitin (thick dashed line) elutes at an apparent molecular weight of 10 kDa, matching its calculated MW and indicating that it is monomeric and folded. The MW calibration profile of the column is shown as a dashed line. Static light scattering analysis, however, shows PUP to be a monomer (MW, right axis). B, structural analysis of *mtPUP* with CD spectroscopy. The corresponding spectrum (solid line) shows a distinct negative peak at 200 nm, indicating considerable content in random coil conformation. The presence of an additional minimum at 226 nm indicates  $\alpha$ -helical content of part of the PUP

sequence. For comparison, the CD spectrum for ubiquitin is also shown (dashed line), indicating that the complete protein is folded. Based on this comparison, it can safely be assumed that the 3D structures of ubiquitin and PUP are unrelated.

### **Supplement Figure 5. Multiple sequence alignment of mycobacterial PUP**

**sequences and secondary structure prediction.** A, multiple sequence alignment of PUP homologues, demonstrating little sequence conservation of the N-terminal part of the respective sequences and high sequence similarity for the C-terminal part of the respective sequences. The positions of two lysine residues, which could serve as pupylation sites in *mtPUP* are marked with asterisks (for details see text). B, secondary structure prediction of PUP indicates  $\alpha$ -helical content in the C-terminal half of the protein, indicated by high confidence levels (0=low, 9=high). In contrast, the N-terminal part of the protein is predicted to be unstructured. Positive and negatively charged residues are labeled in red and blue respectively, indicating an amphipathic helix topology.

### **References**

- Chen X, Solomon WC, Kang Y, Cerda-Maira F, Darwin KH, Walters KJ (2009) Prokaryotic ubiquitin-like protein Pup is intrinsically disordered. *J Mol Biol.* 392: 208-217.
- Liao S, Shang Q, Zhang X, Zhang J, Xu C, Tu X (2009) Pup, a prokaryotic ubiquitin-like protein, is an intrinsically disordered protein. *Biochem J.* 422: 207-215.

Supplement Table 1A

| Index | % Cov | Uniprot ID | Gene locus<br>(M. smegmatis) | Conf | Peptide Sequence             | Modifications                                                                               | Cleavages                               | ΔMass | Prec MW | Prec m/z | Calc. MW | Calc. m/z | Theor z | Area 115 |
|-------|-------|------------|------------------------------|------|------------------------------|---------------------------------------------------------------------------------------------|-----------------------------------------|-------|---------|----------|----------|-----------|---------|----------|
| 0     | 100.0 | B6DAC1     | (Rv2111c)                    | 99.0 | EKLTEETDDL                   | ITRAQ4plex@N-term; ITRAQ4plex(K)@2                                                          | cleaved L-L@C-term; missed K-L@2        | 0.07  | 1479.82 | 740.92   | 1479.75  | 740.88    | 2       | 1.864.0  |
|       | 100.0 | B6DAC1     | (Rv2111c)                    | 99.0 | EKLTEETDLDLLEI               | No ITRAQ4plex@N-term; ITRAQ4plex(K)@2                                                       | cleaved I-D@C-term; missed K-L@2        | 0.00  | 1805.89 | 903.95   | 1805.89  | 903.95    | 2       | 505.4    |
|       | 100.0 | B6DAC1     | (Rv2111c)                    | 99.0 | EKLTEETDLDLLEID              | ITRAQ4plex@N-term; ITRAQ4plex(K)@2                                                          | cleaved D-D@C-term; missed K-L@2        | -0.02 | 2065.00 | 689.34   | 2065.02  | 689.35    | 3       | 107.4    |
|       | 100.0 | B6DAC1     | (Rv2111c)                    | 99.0 | EKLTEETDLDLLEIDD             | ITRAQ4plex@N-term; ITRAQ4plex(K)@2                                                          | cleaved D-V@C-term; missed K-L@2        | 0.01  | 2180.05 | 727.69   | 2180.05  | 727.69    | 3       | 46.5     |
|       | 100.0 | B6DAC1     | (Rv2111c)                    | 99.0 | EKLTEETDLDLLEIDDDL           | ITRAQ4plex@N-term; ITRAQ4plex(K)@2                                                          | cleaved L-E@C-term; missed K-L@2        | 0.00  | 2392.20 | 798.41   | 2392.20  | 798.41    | 3       | 60.9     |
|       | 100.0 | B6DAC1     | (Rv2111c)                    | 99.0 | EKLTEETDLDLLEIDVLEENAE       | ITRAQ4plex@N-term; ITRAQ4plex(K)@2                                                          | cleaved E-D@C-term; missed K-L@2        | -0.05 | 2964.35 | 989.12   | 2964.41  | 989.14    | 3       | 32.6     |
|       | 100.0 | B6DAC1     | (Rv2111c)                    | 99.0 | EKLTEETDLDLLEIDVLEENAEFVFR   | No ITRAQ4plex@N-term; ITRAQ4plex(K)@2                                                       | missed K-L@2                            | 0.03  | 3337.60 | 1113.54  | 3337.57  | 1113.53   | 3       | 144.9    |
|       | 100.0 | B6DAC1     | (Rv2111c)                    | 99.0 | GGGGGEDDDLPGASAAAGQER        | ITRAQ4plex@N-term; Glu->Asp@6; Pro->Thr@11                                                  |                                         | 0.02  | 1948.87 | 650.63   | 1948.85  | 650.62    | 3       | 90.7     |
|       | 100.0 | B6DAC1     | (Rv2111c)                    | 99.0 | LTEETDLDLLEIDVLEENAEFVFR     | ITRAQ4plex@N-term                                                                           |                                         | 0.01  | 3080.44 | 1027.82  | 3080.43  | 1027.82   | 3       |          |
|       | 100.0 | B6DAC1     | (Rv2111c)                    | 99.0 | MAEQQTQK                     | ITRAQ4plex@N-term; ITRAQ4plex(K)@7                                                          |                                         | 0.02  | 1122.61 | 562.31   | 1122.59  | 562.30    | 2       | 142.2    |
|       | 100.0 | B6DAC1     | (Rv2111c)                    | 97.0 | GGGGGEDDDLPGASAAAGQERR       | ITRAQ4plex@N-term; Pro->Ser@11                                                              | missed R-R@20                           | 0.07  | 2105.02 | 702.68   | 2104.95  | 702.66    | 3       | 3.262.8  |
|       | 100.0 | B6DAC1     | (Rv2111c)                    | 96.0 | EKLTEETDLDLLE                | ITRAQ4plex@N-term; ITRAQ4plex(K)@2                                                          | cleaved D-E@C-term; missed K-L@2        | -0.01 | 1707.86 | 854.94   | 1707.87  | 854.94    | 2       | 1.352.4  |
|       | 100.0 | B6DAC1     | (Rv2111c)                    | 95.0 | EKLTEETDLDLLE                | ITRAQ4plex@N-term; ITRAQ4plex(K)@2                                                          | cleaved E-I@C-term; missed K-L@2        | 0.00  | 1836.91 | 613.31   | 1836.91  | 613.31    | 3       | 46.7     |
|       | 100.0 | B6DAC1     | (Rv2111c)                    | 91.0 | EKLTEETDLDLLEIDVLEEE         | ITRAQ4plex@N-term; ITRAQ4plex(K)@2                                                          | cleaved E-N@C-term; missed K-L@2        | 0.00  | 2650.28 | 884.43   | 2650.28  | 884.44    | 3       | 42.4     |
|       | 100.0 | B6DAC1     | (Rv2111c)                    | 85.0 | EKLTEETDLDLLEIDVLEEN         | ITRAQ4plex@N-term; ITRAQ4plex(K)@2                                                          | cleaved N-A@C-term; missed K-L@2        | 0.03  | 2764.36 | 922.46   | 2764.33  | 922.45    | 3       | 16.3     |
|       | 100.0 | B6DAC1     | (Rv2111c)                    | 81.0 | EKLTEETDLDLLE                | ITRAQ4plex@N-term; ITRAQ4plex(K)@2                                                          | cleaved L-D@C-term; missed K-L@2        | -0.03 | 1592.81 | 797.41   | 1592.84  | 797.43    | 2       | 857.8    |
|       | 100.0 | B6DAC1     | (Rv2111c)                    | 60.0 | EKLTEETDLDLLEIDVLE           | ITRAQ4plex@N-term; ITRAQ4plex(K)@2                                                          | cleaved E-E@C-term; missed K-L@2        | -0.01 | 2521.23 | 841.42   | 2521.24  | 841.42    | 3       | 14.1     |
|       | 100.0 | B6DAC1     | (Rv2111c)                    | 78.0 | AVVQK                        | ITRAQ4plex@N-term; ITRAQ4plex(K)@5                                                          |                                         | 0.01  | 895.55  | 448.78   | 895.54   | 448.78    | 2       | 16.3     |
|       | 100.0 | B6DAC1     | (Rv2111c)                    | 88.0 | EKLTEETDLDLLEIDVLEENAEFVFR   | No ITRAQ4plex@N-term; ITRAQ4plex(K)@2; Deamidated(N)@21; ITRAQ4plex(Y)@29; ITRAQ4plex(K)@32 | missed K-L@2; missed R-A@27; missed K-G | -0.27 | 4487.92 | 1122.99  | 4488.19  | 1123.06   | 4       | 1.675.9  |
|       | 100.0 | B6DAC1     | (Rv2111c)                    | 99.0 | AEDFVR                       | ITRAQ4plex@N-term                                                                           | cleaved N-A@N-term                      | 0.01  | 879.46  | 440.74   | 879.46   | 440.74    | 2       | 747.7    |
|       | 100.0 | B6DAC1     | (Rv2111c)                    | 99.0 | AOEQTK                       | ITRAQ4plex@N-term; Lys->Gln@6                                                               | cleaved M-A@N-term                      | 0.02  | 847.44  | 424.73   | 847.42   | 424.72    | 2       | 5.4      |
|       | 100.0 | B6DAC1     | (Rv2111c)                    | 99.0 | EKLTEETDDL                   | ITRAQ4plex@N-term; ITRAQ4plex(K)@2                                                          | cleaved L-L@C-term; missed K-L@2        | 0.03  | 1479.78 | 740.90   | 1479.75  | 740.88    | 2       | 2.331.7  |
|       | 100.0 | B6DAC1     | (Rv2111c)                    | 75.0 | EKLTEETDDL                   | No ITRAQ4plex@N-term; ITRAQ4plex(K)@2                                                       | cleaved L-L@C-term; missed K-L@2        | 0.01  | 1335.66 | 668.84   | 1335.65  | 668.83    | 2       | 472.2    |
|       | 100.0 | B6DAC1     | (Rv2111c)                    | 91.0 | EKLTEETDLDLLEID              | No ITRAQ4plex@N-term; ITRAQ4plex(K)@2                                                       | cleaved D-D@C-term; missed K-L@2        | 0.03  | 1920.95 | 961.48   | 1920.92  | 961.47    | 2       | 808.2    |
|       | 100.0 | B6DAC1     | (Rv2111c)                    | 97.0 | EKLTEETDLDLLEIDDDL           | ITRAQ4plex@N-term; ITRAQ4plex(K)@2                                                          | missed L-E@C-term; missed K-L@2         | -0.02 | 2392.18 | 798.40   | 2392.20  | 798.41    | 3       | 47.8     |
|       | 100.0 | B6DAC1     | (Rv2111c)                    | 99.0 | EKLTEETDLDLLEIDVLEENAEFVFR   | ITRAQ4plex@N-term; ITRAQ4plex(K)@2; Deamidated(N)@21                                        | cleaved K-L@2                           | -0.06 | 3482.59 | 871.66   | 3482.66  | 871.67    | 4       |          |
|       | 100.0 | B6DAC1     | (Rv2111c)                    | 99.0 | EKLTEETDLDLLEIDVLEENAEFVFR   | Glu->pyro-Glu@N-term; ITRAQ4plex(K)@2                                                       | missed K-L@2                            | 0.06  | 3319.62 | 1107.55  | 3319.56  | 1107.53   | 3       | 109.9    |
|       | 100.0 | B6DAC1     | (Rv2111c)                    | 99.0 | EKLTEETDLDLLEIDVLEENAEFVFR   | ITRAQ4plex@N-term; ITRAQ4plex(K)@2; Leu->His@18                                             | missed K-L@2                            | -0.01 | 3505.64 | 877.42   | 3505.65  | 877.42    | 4       | 258.7    |
|       | 100.0 | B6DAC1     | (Rv2111c)                    | 99.0 | EKLTEETDLDLLEIDVLEENAEFVFR   | No ITRAQ4plex@N-term; ITRAQ4plex(K)@2                                                       | missed K-L@2                            | -0.13 | 3337.44 | 1113.49  | 3337.57  | 1113.53   | 3       | 339.9    |
|       | 100.0 | B6DAC1     | (Rv2111c)                    | 99.0 | EKLTEETDLDLLEIDVLEENAEFVFR   | No ITRAQ4plex@N-term; ITRAQ4plex(K)@2; Dimethyl(R)@27                                       | missed K-L@2                            | -0.05 | 3365.56 | 842.40   | 3365.60  | 842.41    | 4       | 10.9     |
|       | 100.0 | B6DAC1     | (Rv2111c)                    | 99.0 | EKLTEETDLDLLEIDVLEENAEFVFR   | No ITRAQ4plex@N-term; Lys->Gln@2                                                            | missed K-L@2                            | 0.08  | 3193.51 | 1065.51  | 3193.43  | 1065.48   | 3       | 34.3     |
|       | 100.0 | B6DAC1     | (Rv2111c)                    | 99.0 | EKLTEETDLDLLEIDVLEENAEFVFR   | No ITRAQ4plex@N-term; Lys->Gln@2                                                            | missed K-L@2                            | 0.14  | 3193.57 | 1065.53  | 3193.43  | 1065.48   | 3       | 67.6     |
|       | 100.0 | B6DAC1     | (Rv2111c)                    | 99.0 | EKLTEETDLDLLEIDVLEENAEFVFR   | No ITRAQ4plex@N-term; Lys->Gln@2; Glu->Arg@23; Deamidated(R)@27                             | missed K-L@2                            | 0.04  | 3221.51 | 1074.84  | 3221.47  | 1074.83   | 3       | 23.7     |
|       | 100.0 | B6DAC1     | (Rv2111c)                    | 99.0 | EKLTEETDLDLLEIDVLEENAEFVFR   | ITRAQ4plex@N-term; ITRAQ4plex(K)@2; Leu->His@11                                             | missed K-L@2                            | 0.01  | 3505.66 | 877.42   | 3505.65  | 877.42    | 4       | 143.8    |
|       | 100.0 | B6DAC1     | (Rv2111c)                    | 99.0 | EKLTEETDLDLLEIDVLEENAEFVFR   | ITRAQ4plex@N-term; ITRAQ4plex(K)@2                                                          | missed K-L@2                            | 0.08  | 3481.75 | 871.44   | 3481.67  | 871.43    | 4       | 30.4     |
|       | 100.0 | B6DAC1     | (Rv2111c)                    | 99.0 | EKLTEETDLDLLEIDVLEENAEFVFR   | ITRAQ4plex@N-term; Lys->Arg@2; ITRAQ4plex(T)@4                                              | missed K-L@2                            | 0.06  | 3509.74 | 878.44   | 3509.68  | 878.43    | 4       | 23.6     |
|       | 100.0 | B6DAC1     | (Rv2111c)                    | 99.0 | EKLTEETDLDLLEIDVLEENAEFVFR   | ITRAQ4plex@N-term; ITRAQ4plex(K)@2                                                          | missed K-L@2                            | 0.04  | 3481.71 | 871.44   | 3481.67  | 871.43    | 4       | 21.6     |
|       | 100.0 | B6DAC1     | (Rv2111c)                    | 99.0 | EKLTEETDLDLLEIDVLEENAEFVFR   | No ITRAQ4plex@N-term; ITRAQ4plex(K)@2                                                       | missed K-L@2                            | -0.02 | 3337.55 | 1113.53  | 3337.57  | 1113.53   | 3       | 196.3    |
|       | 100.0 | B6DAC1     | (Rv2111c)                    | 99.0 | EKLTEETDLDLLEIDVLEENAEFVFR   | No ITRAQ4plex@N-term; ITRAQ4plex(K)@2; Asp->Asn@16; Deamidated(N)@21                        | missed K-L@2                            | 0.00  | 3337.57 | 835.40   | 3337.57  | 835.40    | 4       | 262.5    |
|       | 100.0 | B6DAC1     | (Rv2111c)                    | 99.0 | EKLTEETDLDLLEIDVLEENAEFVFR   | ITRAQ4plex@N-term; ITRAQ4plex(K)@2                                                          | missed K-L@2                            | -0.01 | 3481.66 | 871.42   | 3481.67  | 871.43    | 4       | 143.5    |
|       | 100.0 | B6DAC1     | (Rv2111c)                    | 99.0 | EKLTEETDLDLLEIDVLEENAEFVFR   | No ITRAQ4plex@N-term; ITRAQ4plex(K)@2                                                       | missed K-L@2                            | 0.07  | 3337.64 | 835.42   | 3337.57  | 835.40    | 4       | 112.4    |
|       | 100.0 | B6DAC1     | (Rv2111c)                    | 94.0 | EKLTEETDLDLLEIDVLEENAEFVFR   | ITRAQ4plex@N-term; ITRAQ4plex(K)@2; Deamidated(N)@21                                        | missed K-L@2                            | 0.07  | 3482.72 | 871.69   | 3482.66  | 871.67    | 4       |          |
|       | 100.0 | B6DAC1     | (Rv2111c)                    | 99.0 | GGGGGEDDDLPGASAAAGQER        | No ITRAQ4plex@N-term; Glu->Asp@6; Oxidation(P)@11; ITRAQ4plex(S)@14                         |                                         | 0.05  | 1960.89 | 654.64   | 1960.85  | 654.62    | 3       | 435.0    |
|       | 100.0 | B6DAC1     | (Rv2111c)                    | 99.0 | GGGGGEDDDLPGASAAAGQER        | No ITRAQ4plex@N-term; Glu->Asp@6; Oxidation(P)@11; ITRAQ4plex(S)@14                         |                                         | 0.05  | 1960.90 | 654.64   | 1960.85  | 654.62    | 3       | 772.6    |
|       | 100.0 | B6DAC1     | (Rv2111c)                    | 99.0 | GGGGGEDDDLPGASAAAGQER        | No ITRAQ4plex@N-term; Glu->Asp@6; Oxidation(P)@11; ITRAQ4plex(S)@14                         |                                         | 0.01  | 1960.85 | 654.63   | 1960.85  | 654.62    | 3       | 503.4    |
|       | 100.0 | B6DAC1     | (Rv2111c)                    | 99.0 | GGGGGEDDDLPGASAAAGQER        | No ITRAQ4plex@N-term; Glu->Asp@6; Oxidation(P)@11; ITRAQ4plex(S)@14                         |                                         | 0.04  | 1960.89 | 654.64   | 1960.85  | 654.62    | 3       | 231.1    |
|       | 100.0 | B6DAC1     | (Rv2111c)                    | 99.0 | GGGGGEDDDLPGASAAAGQER        | No ITRAQ4plex@N-term; Oxidation(P)@11; ITRAQ4plex(S)@14                                     |                                         | 0.00  | 1974.87 | 659.30   | 1974.86  | 659.30    | 3       | 33.7     |
|       | 100.0 | B6DAC1     | (Rv2111c)                    | 99.0 | GGGGGEDDDLPGASAAAGQER        | ITRAQ4plex@N-term; Glu->Asp@6; Pro->Thr@11                                                  |                                         | 0.01  | 1948.85 | 650.63   | 1948.85  | 650.62    | 3       | 1.246.8  |
|       | 100.0 | B6DAC1     | (Rv2111c)                    | 98.0 | GGGGGEDDDLPGASAAAGQER        | ITRAQ4plex@N-term; Glu->Asp@6; Ser->Glu@14                                                  |                                         | -0.05 | 1986.81 | 663.28   | 1986.86  | 663.30    | 3       | 8.7      |
|       | 100.0 | B6DAC1     | (Rv2111c)                    | 96.0 | GGGGGEDDDLPGASAAAGQER        | ITRAQ4plex@N-term; Carboxy(E)@6; Pro->Thr@11                                                |                                         | -0.01 | 2006.84 | 669.95   | 2006.85  | 669.96    | 3       | 58.7     |
|       | 100.0 | B6DAC1     | (Rv2111c)                    | 91.0 | GGGGGEDDDLPGASAAAGQER        | No ITRAQ4plex@N-term; Carboxy(E)@6; Oxidation(P)@11; ITRAQ4plex(S)@14                       |                                         | 0.01  | 2018.87 | 673.96   | 2018.85  | 673.96    | 3       | 81.3     |
|       | 100.0 | B6DAC1     | (Rv2111c)                    | 78.0 | GGGGGEDDDLPGASAAAGQER        | ITRAQ4plex@N-term; Pro->Gln@11; Deamidated(Q)@18                                            |                                         | 0.04  | 1990.90 | 664.64   | 1990.86  | 664.63    | 3       | 42.2     |
|       | 100.0 | B6DAC1     | (Rv2111c)                    | 91.0 | GGGGGEDDDLPGASAAAGQERR       | No ITRAQ4plex@N-term; Asp->Ser@9                                                            | missed R-R@20                           | -0.03 | 1942.85 | 648.62   | 1942.87  | 648.63    | 3       | 21.7     |
|       | 100.0 | B6DAC1     | (Rv2111c)                    | 99.0 | LTEETDLDLLEIDVLEENAEFVFR     | No ITRAQ4plex@N-term                                                                        |                                         | -0.05 | 2936.28 | 979.77   | 2936.33  | 979.78    | 3       |          |
|       | 100.0 | B6DAC1     | (Rv2111c)                    | 99.0 | LTEETDLDLLEIDVLEENAEFVFR     | ITRAQ4plex@N-term                                                                           |                                         | -0.04 | 3080.40 | 1027.81  | 3080.43  | 1027.82   | 3       | 33.7     |
|       | 100.0 | B6DAC1     | (Rv2111c)                    | 99.0 | LTEETDLDLLEIDVLEENAEFVFR     | ITRAQ4plex@N-term; Ala->Val@20                                                              |                                         | -0.06 | 3108.40 | 1037.14  | 3108.46  | 1037.16   | 3       | 15.0     |
|       | 100.0 | B6DAC1     | (Rv2111c)                    | 99.0 | LTEETDLDLLEIDVLEENAEFVFR     | ITRAQ4plex@N-term; Dimethyl(R)@25                                                           |                                         | -0.07 | 3108.53 | 778.14   | 3108.46  | 778.12    | 4       | 119.1    |
|       | 100.0 | B6DAC1     | (Rv2111c)                    | 99.0 | LTEETDLDLLEIDVLEENAEFVFR     | ITRAQ4plex@N-term; Leu->His@16                                                              |                                         | -0.10 | 3104.31 | 777.08   | 3104.41  | 777.11    | 4       | 53.3     |
|       | 100.0 | B6DAC1     | (Rv2111c)                    | 96.0 | LTEETDLDLLEIDVLEENAEFVFR     | ITRAQ4plex@N-term; Thr->Glu@5; Dimethyl(R)@25                                               |                                         | -0.10 | 3136.56 | 1046.53  | 3136.46  | 1046.49   | 3       | 8.6      |
|       | 100.0 | B6DAC1     | (Rv2111c)                    | 99.0 | REKLTTEETDLDLLEIDVLEENAEFVFR | No ITRAQ4plex@N-term; ITRAQ4plex(K)@3; Oxidation(D)@13                                      | missed R-E@1; missed K-L@3              | 0.00  | 3509.66 | 878.42   | 3509.67  | 878.42    | 4       | 10.9     |
|       | 100.0 | B6DAC1     | (Rv2111c)                    | 99.0 | RGGGGGEDDDLPGASAAAGQER       | No ITRAQ4plex@N-term; Ser->Asp@15                                                           | missed R-G@1                            | -0.03 | 1998.84 | 500.72   | 1998.86  | 500.72    | 4       | 15.2     |



Supplement Table 1A

| Index | % Cov  | Uniprot ID | Gene locus<br>(M. smegmatis) | Conf        | Peptide Sequence                   | Modifications                                                                | Cleavages          | ΔMass   | Prec MW | Prec m/z | Calc. MW | Calc. m/z | Theor z  | Area 115 |
|-------|--------|------------|------------------------------|-------------|------------------------------------|------------------------------------------------------------------------------|--------------------|---------|---------|----------|----------|-----------|----------|----------|
| 1     | 98.9   | A0R4D0     | MSMEG_5790                   | 99.0        | ALSSAGNIGNVTVAPTGAGIHEVDVK         | ITRAQ4plex@N-term; Deamidated(N)@7; ITRAQ4plex(H)@20; User modH on Lys(K)@25 | missed K-V@25      | -0.04   | 3065.57 | 767.40   | 3065.61  | 767.41    | 4        | 132.1    |
|       | 98.9   | A0R4D0     | MSMEG_5790                   | 99.0        | DGSGQAVGGAFVR                      | ITRAQ4plex@N-term                                                            | cleaved V-D@N-term | 0.04    | 1363.74 | 682.88   | 1363.70  | 682.86    | 2        | 505.8    |
|       | 98.9   | A0R4D0     | MSMEG_5790                   | 99.0        | FAAPGTWTVR                         | ITRAQ4plex@N-term                                                            | cleaved F-F@N-term | 0.01    | 1248.69 | 625.35   | 1248.67  | 625.34    | 2        | 4.376.8  |
|       | 98.9   | A0R4D0     | MSMEG_5790                   | 99.0        | FFAAPGTWTVR                        | ITRAQ4plex@N-term                                                            |                    | 0.03    | 1395.77 | 698.89   | 1395.74  | 698.88    | 2        | 1.642.5  |
|       | 98.9   | A0R4D0     | MSMEG_5790                   | 99.0        | LLDGSDEFTAEVVASATGDFR              | ITRAQ4plex@N-term                                                            |                    | 0.00    | 2343.14 | 782.05   | 2343.14  | 782.05    | 3        | 26.1     |
|       | 98.9   | A0R4D0     | MSMEG_5790                   | 99.0        | VDGSGQAVGGAFVR                     | ITRAQ4plex@N-term                                                            | cleaved V-V@N-term | 0.02    | 1462.78 | 488.60   | 1462.77  | 488.60    | 3        | 410.9    |
|       | 98.9   | A0R4D0     | MSMEG_5790                   | 99.0        | FAAPGTWTVR                         | ITRAQ4plex@N-term; Dimethyl(R)@10                                            | cleaved F-F@N-term | 0.00    | 1276.71 | 639.36   | 1276.70  | 639.36    | 2        | 1.892.2  |
|       | 98.9   | A0R4D0     | MSMEG_5790                   | 99.0        | FAAPGTWTVR                         | ITRAQ4plex@N-term                                                            | cleaved F-F@N-term | 0.01    | 1248.68 | 625.35   | 1248.67  | 625.34    | 2        | 7.522.6  |
|       | 98.9   | A0R4D0     | MSMEG_5790                   | 99.0        | FFAAPGTWTVR                        | ITRAQ4plex@N-term                                                            |                    | 0.04    | 1395.78 | 698.90   | 1395.74  | 698.88    | 2        | 4.656.4  |
|       | 98.9   | A0R4D0     | MSMEG_5790                   | 99.0        | FFAAPGTWTVR                        | ITRAQ4plex@N-term                                                            |                    | -0.01   | 1395.74 | 698.88   | 1395.74  | 698.88    | 2        | 11.648.9 |
|       | 98.9   | A0R4D0     | MSMEG_5790                   | 99.0        | FFAAPGTWTVR                        | ITRAQ4plex@N-term                                                            |                    | 0.03    | 1395.77 | 698.89   | 1395.74  | 698.88    | 2        | 8.399.6  |
|       | 98.9   | A0R4D0     | MSMEG_5790                   | 99.0        | LLDGSDEFTAEVVASATGDFR              | ITRAQ4plex@N-term                                                            |                    | 0.00    | 2343.13 | 782.05   | 2343.14  | 782.05    | 3        | 22.8     |
|       | 98.9   | A0R4D0     | MSMEG_5790                   | 99.0        | LLDGSDEFTAEVVASATGDFR              | ITRAQ4plex@N-term                                                            |                    | 0.00    | 2343.14 | 782.05   | 2343.14  | 782.05    | 3        | 35.9     |
|       | 98.9   | A0R4D0     | MSMEG_5790                   | 99.0        | LLDGSDEFTAEVVASATGDFR              | ITRAQ4plex@N-term                                                            |                    | -0.01   | 2343.13 | 782.05   | 2343.14  | 782.05    | 3        | 33.7     |
|       | 98.9   | A0R4D0     | MSMEG_5790                   | 99.0        | LLDGSDEFTAEVVASATGDFR              | ITRAQ4plex@N-term                                                            |                    | 0.00    | 2343.14 | 782.05   | 2343.14  | 782.05    | 3        | 264.4    |
|       | 98.9   | A0R4D0     | MSMEG_5790                   | 99.0        | LLDGSDEFTAEVVASATGDFR              | ITRAQ4plex@N-term                                                            |                    | 0.02    | 2343.15 | 782.06   | 2343.14  | 782.05    | 3        | 374.1    |
|       | 98.9   | A0R4D0     | MSMEG_5790                   | 99.0        | LLDGSDEFTAEVVASATGDFR              | ITRAQ4plex@N-term; Dimethyl(R)@21                                            |                    | 0.05    | 2371.21 | 791.41   | 2371.17  | 791.40    | 3        | 121.6    |
|       | 98.9   | A0R4D0     | MSMEG_5790                   | 99.0        | LLDGSDEFTAEVVASATGDFR              | ITRAQ4plex@N-term                                                            |                    | 0.00    | 2343.13 | 782.05   | 2343.14  | 782.05    | 3        | 19.6     |
|       | 98.9   | A0R4D0     | MSMEG_5790                   | 99.0        | LLDGSDEFTAEVVASATGDFR              | ITRAQ4plex@N-term                                                            |                    | 0.00    | 2343.14 | 782.05   | 2343.14  | 782.05    | 3        |          |
|       | 98.9   | A0R4D0     | MSMEG_5790                   | 99.0        | LLDGSDEFTAEVVASATGDFR              | ITRAQ4plex@N-term                                                            |                    | 0.02    | 2343.16 | 782.06   | 2343.14  | 782.05    | 3        |          |
|       | 98.9   | A0R4D0     | MSMEG_5790                   | 99.0        | LLDGSDEFTAEVVASATGDFR              | ITRAQ4plex@N-term                                                            |                    | -0.04   | 2343.10 | 782.04   | 2343.14  | 782.05    | 3        |          |
|       | 98.9   | A0R4D0     | MSMEG_5790                   | 99.0        | LLDGSDEFTAEVVASATGDFR              | ITRAQ4plex@N-term                                                            |                    | 0.02    | 2343.16 | 782.06   | 2343.14  | 782.05    | 3        |          |
|       | 98.9   | A0R4D0     | MSMEG_5790                   | 99.0        | LLDGSDEFTAEVVASATGDFR              | ITRAQ4plex@N-term                                                            |                    | 0.03    | 2343.17 | 782.06   | 2343.14  | 782.05    | 3        | 177.3    |
|       | 98.9   | A0R4D0     | MSMEG_5790                   | 99.0        | LLDGSDEFTAEVVASATGDFR              | ITRAQ4plex@N-term                                                            |                    | 0.03    | 2343.17 | 782.06   | 2343.14  | 782.05    | 3        | 9.8      |
|       | 98.9   | A0R4D0     | MSMEG_5790                   | 99.0        | LLDGSDEFTAEVVASATGDFR              | ITRAQ4plex@N-term                                                            |                    | -0.05   | 2343.08 | 782.03   | 2343.14  | 782.05    | 3        | 30.4     |
|       | 98.9   | A0R4D0     | MSMEG_5790                   | 99.0        | LLDGSDEFTAEVVASATGDFR              | ITRAQ4plex@N-term                                                            |                    | -0.01   | 2343.13 | 782.05   | 2343.14  | 782.05    | 3        |          |
|       | 98.9   | A0R4D0     | MSMEG_5790                   | 99.0        | LLDGSDEFTAEVVASATGDFR              | ITRAQ4plex@N-term; Methyl(E)@11                                              |                    | 0.01    | 2357.16 | 786.73   | 2357.15  | 786.72    | 3        |          |
|       | 98.9   | A0R4D0     | MSMEG_5790                   | 99.0        | LLDGSDEFTAEVVASATGDFR              | ITRAQ4plex@N-term; Dehydrated(E)@11                                          |                    | 0.04    | 2325.16 | 776.06   | 2325.12  | 776.05    | 3        | 17.4     |
|       | 98.9   | A0R4D0     | MSMEG_5790                   | 99.0        | LLDGSDEFTAEVVASATGDFR              | ITRAQ4plex@N-term; Ala->Val@16                                               |                    | -0.01   | 2371.16 | 791.39   | 2371.17  | 791.40    | 3        | 10.9     |
|       | 98.9   | A0R4D0     | MSMEG_5790                   | 99.0        | LLDGSDEFTAEVVASATGDFR              | ITRAQ4plex@N-term; Dehydrated(D)@19                                          |                    | 0.04    | 2325.16 | 776.06   | 2325.12  | 776.05    | 3        | 28.3     |
|       | 98.9   | A0R4D0     | MSMEG_5790                   | 99.0        | LLDGSDEFTAEVVASATGDFR              | ITRAQ4plex@N-term; Dimethyl(R)@21                                            |                    | 0.04    | 2371.21 | 791.41   | 2371.17  | 791.40    | 3        | 145.3    |
|       | 98.9   | A0R4D0     | MSMEG_5790                   | 99.0        | LLDGSDEFTAEVVASATGDFR              | ITRAQ4plex@N-term; Dimethyl(R)@21                                            |                    | 0.04    | 2371.20 | 791.41   | 2371.17  | 791.40    | 3        | 81.4     |
|       | 98.9   | A0R4D0     | MSMEG_5790                   | 99.0        | LLDGSDEFTAEVVASATGDFR              | ITRAQ4plex@N-term; Dimethyl(R)@21                                            |                    | -0.06   | 2371.11 | 791.38   | 2371.17  | 791.40    | 3        |          |
|       | 98.9   | A0R4D0     | MSMEG_5790                   | 99.0        | LLDGSDEFTAEVVASATGDFR              | ITRAQ4plex@N-term; Dimethyl(R)@21                                            |                    | -0.06   | 2371.11 | 791.38   | 2371.17  | 791.40    | 3        |          |
|       | 98.9   | A0R4D0     | MSMEG_5790                   | 99.0        | LLDGSDEFTAEVVASATGDFR              | ITRAQ4plex@N-term; Dimethyl(R)@21                                            |                    | -0.06   | 2371.10 | 791.38   | 2371.17  | 791.40    | 3        |          |
|       | 98.9   | A0R4D0     | MSMEG_5790                   | 99.0        | VVDGSGQAVGGAFVR                    | ITRAQ4plex@N-term                                                            |                    | -0.02   | 1561.82 | 781.92   | 1561.83  | 781.92    | 2        | 5.891.2  |
|       | 98.9   | A0R4D0     | MSMEG_5790                   | 99.0        | VVDGSGQAVGGAFVR                    | ITRAQ4plex@N-term                                                            |                    | -0.02   | 1561.81 | 781.91   | 1561.83  | 781.92    | 2        | 5.595.1  |
|       | 98.9   | A0R4D0     | MSMEG_5790                   | 99.0        | VVDGSGQAVGGAFVR                    | ITRAQ4plex@N-term                                                            |                    | -0.02   | 1561.82 | 781.92   | 1561.83  | 781.92    | 2        | 1.045.9  |
|       | 98.9   | A0R4D0     | MSMEG_5790                   | 99.0        | VVDGSGQAVGGAFVR                    | ITRAQ4plex@N-term                                                            |                    | -0.01   | 1561.82 | 781.92   | 1561.83  | 781.92    | 2        | 5.760.6  |
|       | 98.9   | A0R4D0     | MSMEG_5790                   | 99.0        | VVDGSGQAVGGAFVR                    | ITRAQ4plex@N-term                                                            |                    | -0.01   | 1561.82 | 781.92   | 1561.83  | 781.92    | 2        | 58.7     |
|       | 98.9   | A0R4D0     | MSMEG_5790                   | 99.0        | VVDGSGQAVGGAFVR                    | ITRAQ4plex@N-term; Dimethyl(R)@15                                            |                    | 0.00    | 1589.86 | 530.96   | 1589.86  | 530.96    | 3        | 792.3    |
|       | 98.9   | A0R4D0     | MSMEG_5790                   | 99.0        | VVDGSGQAVGGAFVR                    | ITRAQ4plex@N-term; Dimethyl(R)@15                                            |                    | -0.05   | 1589.82 | 530.95   | 1589.86  | 530.96    | 3        | 3.762.7  |
|       | 98.9   | A0R4D0     | MSMEG_5790                   | 98.0        | LLDGSDEFTAEVVASATGDFR              | ITRAQ4plex@N-term; Oxidation(F)@8                                            |                    | 0.06    | 2359.19 | 787.41   | 2359.13  | 787.38    | 3        | 33.7     |
|       | 98.9   | A0R4D0     | MSMEG_5790                   | 98.0        | LLDGSDEFTAEVVASATGDFR              | ITRAQ4plex@N-term; Glu->Arg@11                                               |                    | 0.01    | 2370.20 | 791.07   | 2370.19  | 791.07    | 3        | 30.3     |
|       | 98.9   | A0R4D0     | MSMEG_5790                   | 98.0        | LLDGSDEFTAEVVASATGDFR              | ITRAQ4plex@N-term; Dehydrated(D)@19                                          |                    | 0.01    | 2325.14 | 776.05   | 2325.12  | 776.05    | 3        | 17.4     |
|       | 98.9   | A0R4D0     | MSMEG_5790                   | 95.0        | ETVITGR                            | ITRAQ4plex@N-term                                                            |                    | 0.00    | 918.53  | 460.27   | 918.53   | 460.27    | 2        | 2.096.0  |
|       | 98.9   | A0R4D0     | MSMEG_5790                   | 94.0        | ETVITGR                            | ITRAQ4plex@N-term                                                            |                    | -0.02   | 918.51  | 460.26   | 918.53   | 460.27    | 2        | 15.924.5 |
| 98.9  | A0R4D0 | MSMEG_5790 | 94.0                         | ETVITGR     | ITRAQ4plex@N-term                  |                                                                              | -0.02              | 918.51  | 460.26  | 918.53   | 460.27   | 2         | 11.984.0 |          |
| 98.9  | A0R4D0 | MSMEG_5790 | 94.0                         | FFAAPGTWTVR | ITRAQ4plex@N-term; Dimethyl(R)@11  |                                                                              | 0.00               | 1423.77 | 712.89  | 1423.77  | 712.89   | 2         | 5.405.8  |          |
| 98.9  | A0R4D0 | MSMEG_5790 | 91.0                         | FFAAPGTWTVR | ITRAQ4plex@N-term; Oxidation(W)@8  |                                                                              | -0.01              | 1411.73 | 706.87  | 1411.74  | 706.88   | 2         | 1.042.7  |          |
| 98.9  | A0R4D0 | MSMEG_5790 | 87.0                         | FFAAPGTWTVR | ITRAQ4plex@N-term; Dehydrated(T)@7 |                                                                              | -0.05              | 1377.68 | 460.23  | 1377.73  | 460.25   | 3         | 109.3    |          |
| 98.9  | A0R4D0 | MSMEG_5790 | 82.0                         | FAAPGTWTVR  | ITRAQ4plex@N-term; Dehydrated(T)@6 |                                                                              | -0.06              | 1230.61 | 411.21  | 1230.66  | 411.23   | 3         | 47.7     |          |
| 98.9  | A0R4D0 | MSMEG_5790 | 79.0                         | FFAAPGTWTVR | ITRAQ4plex@N-term; Dimethyl(R)@11  |                                                                              | 0.00               | 1423.77 | 712.89  | 1423.77  | 712.89   | 2         | 1.024.1  |          |
| 2     | 84.6   | A0R1V9     | MSMEG_4891                   | 99.0        | ALLTIGDQFPEYDLTAVVGGDLISK          | ITRAQ4plex@N-term; Deamidated(Q)@8; ITRAQ4plex(S)@23; Lys->Gln@24            | cleaved M-A@N-term | 0.05    | 2810.50 | 937.84   | 2810.45  | 937.82    | 3        | 279.4    |
|       | 84.6   | A0R1V9     | MSMEG_4891                   | 99.0        | DFTFVCPTEIAAFGK                    | ITRAQ4plex@N-term; Pyridylethyl(C)@6; Lys->Gln@15                            |                    | 0.04    | 1893.95 | 632.32   | 1893.91  | 632.31    | 3        | 180.5    |
|       | 84.6   | A0R1V9     | MSMEG_4891                   | 99.0        | ELTAACGVLNADGVADR                  | ITRAQ4plex@N-term; Pyridylethyl(C)@6; Dimethyl(R)@17                         |                    | 0.02    | 1951.02 | 651.35   | 1951.00  | 651.34    | 3        | 166.3    |
|       | 84.6   | A0R1V9     | MSMEG_4891                   | 99.0        | KGDPTINAGELLAGAV                   | ITRAQ4plex@N-term; Lys->Trp@1; Dehydrated(D)@3                               | missed K-G@1       | 0.08    | 1708.97 | 855.49   | 1708.89  | 855.45    | 2        | 135.3    |
|       | 84.6   | A0R1V9     | MSMEG_4891                   | 99.0        | LNEFDNR                            | ITRAQ4plex@N-term                                                            |                    | 0.03    | 1180.57 | 591.29   | 1180.55  | 591.28    | 2        | 7.304.6  |
|       | 84.6   | A0R1V9     | MSMEG_4891                   | 99.0        | NEDFDR                             | ITRAQ4plex@N-term                                                            | cleaved L-N@N-term | 0.00    | 1067.47 | 534.74   | 1067.46  | 534.74    | 2        | 103.1    |
|       | 84.6   | A0R1V9     | MSMEG_4891                   | 99.0        | TLPFPMVSDLK                        | ITRAQ4plex@N-term; Lys->Gln@11                                               |                    | 0.03    | 1390.75 | 696.38   | 1390.73  | 696.37    | 2        | 688.8    |

Supplement Table 1A

| Index | % Cov  | Uniprot ID | Gene locus (M. smegmatis) | Conf                         | Peptide Sequence                                     | Modifications                    | Cleavages          | ΔMass              | Prec MW | Prec m/z | Calc. MW | Calc. m/z | Theor z | Area 115 |          |
|-------|--------|------------|---------------------------|------------------------------|------------------------------------------------------|----------------------------------|--------------------|--------------------|---------|----------|----------|-----------|---------|----------|----------|
| 84.6  | A0R1V9 | MSMEG_4891 | 99.0                      | ATFIVDPNNEVQFVSVTAGSVGR      | ITRAQ4plex@N-term; Val->Asn@11                       |                                  |                    | 0.00               | 2565.29 | 856.10   | 2565.29  | 856.11    | 3       | 36.9     |          |
| 84.6  | A0R1V9 | MSMEG_4891 | 99.0                      | ATFIVDPNNEVQFVSVTAGSVGR      | ITRAQ4plex@N-term                                    |                                  |                    | 0.05               | 2550.37 | 851.13   | 2550.32  | 851.11    | 3       | 10.9     |          |
| 84.6  | A0R1V9 | MSMEG_4891 | 99.0                      | ATFIVDPNNEVQFVSVTAGSVGR      | ITRAQ4plex@N-term                                    |                                  |                    | -0.02              | 2550.30 | 851.11   | 2550.32  | 851.11    | 3       | 22.7     |          |
| 84.6  | A0R1V9 | MSMEG_4891 | 99.0                      | DFTFVCPTEIAAFGK              | ITRAQ4plex@N-term; Pyridylethyl(C)@6; Lys->Gln@15    |                                  |                    | 0.05               | 1893.96 | 632.33   | 1893.91  | 632.31    | 3       | 130.9    |          |
| 84.6  | A0R1V9 | MSMEG_4891 | 99                        | KGDPTINAGELLAGAV             | ITRAQ4plex@N-term; User modH on Lys(K)@1             |                                  | missed K-G@1       | 0.05               | 1912.07 | 638.36   | 1912.02  | 638.34    | 3       |          |          |
| 84.6  | A0R1V9 | MSMEG_4891 | 95.0                      | TLPPFMVSDLK                  | ITRAQ4plex@N-term; Lys->Arg@11                       |                                  |                    | 0.03               | 1418.80 | 710.41   | 1418.77  | 710.39    | 2       | 753.8    |          |
| 84.6  | A0R1V9 | MSMEG_4891 | 93.0                      | QPDDYFTR                     | ITRAQ4plex@N-term                                    |                                  |                    | 0.02               | 1184.57 | 593.29   | 1184.56  | 593.29    | 2       | 6,007.4  |          |
| 84.6  | A0R1V9 | MSMEG_4891 | 93.0                      | TLPPFMVSDLKR                 | ITRAQ4plex@N-term; Lys->Gln@11                       |                                  | missed K-R@11      | 0.01               | 1546.84 | 516.62   | 1546.83  | 516.62    | 3       | 226.0    |          |
| 84.6  | A0R1V9 | MSMEG_4891 | 80.0                      | TLPPFMVSDLKR                 | ITRAQ4plex@N-term; Lys->Gln@11                       |                                  | missed K-R@11      | 0.01               | 1546.84 | 516.62   | 1546.83  | 516.62    | 3       | 47.8     |          |
| 84.6  | A0R1V9 | MSMEG_4891 | 76                        | TLPPFMVSDLKR                 | No ITRAQ4plex@N-term; User modH on Lys(K)@11         |                                  | missed K-R@11      | 0.03               | 1645.90 | 549.64   | 1645.87  | 549.63    | 3       | 52.1     |          |
| 3     | 83.7   | A0QYW6     | MSMEG_3811                | 99.0                         | AAGATDIEER                                           | ITRAQ4plex@N-term                |                    | cleaved R-P@C-term | 0.00    | 1175.59  | 588.80   | 1175.59   | 588.80  | 2        | 184.1    |
| 83.7  | A0QYW6 | MSMEG_3811 | 99.0                      | LIATAYFPQSEDSR               | ITRAQ4plex@N-term                                    |                                  |                    | -0.01              | 1853.96 | 618.99   | 1853.96  | 619.00    | 3       | 8.7      |          |
| 83.7  | A0QYW6 | MSMEG_3811 | 99.0                      | LLGSVPANVAR                  | ITRAQ4plex@N-term                                    |                                  |                    | -0.01              | 1239.73 | 620.87   | 1239.74  | 620.88    | 2       | 10,648.1 |          |
| 83.7  | A0QYW6 | MSMEG_3811 | 99.0                      | MAGNAPIYAILR                 | ITRAQ4plex@N-term                                    |                                  |                    | -0.01              | 1432.79 | 717.40   | 1432.80  | 717.41    | 2       | 3,074.5  |          |
| 83.7  | A0QYW6 | MSMEG_3811 | 99.0                      | AAGATDIEER                   | ITRAQ4plex@N-term                                    |                                  | cleaved R-P@C-term | 0.01               | 1175.60 | 588.81   | 1175.59  | 588.80    | 2       | 265.9    |          |
| 83.7  | A0QYW6 | MSMEG_3811 | 99.0                      | ADLLVGVNGLSTIAGR             | ITRAQ4plex@N-term                                    |                                  |                    | -0.01              | 1798.03 | 600.35   | 1798.04  | 600.36    | 3       | 13.0     |          |
| 83.7  | A0QYW6 | MSMEG_3811 | 99.0                      | LLGSVPANVAR                  | ITRAQ4plex@N-term; Ala->Val@10                       |                                  |                    | 0.00               | 1267.77 | 634.89   | 1267.77  | 634.89    | 2       | 1,968.1  |          |
| 83.7  | A0QYW6 | MSMEG_3811 | 99.0                      | MAGNAPIYAILR                 | ITRAQ4plex@N-term                                    |                                  |                    | -0.01              | 1432.79 | 717.40   | 1432.80  | 717.41    | 2       | 4,132.8  |          |
| 83.7  | A0QYW6 | MSMEG_3811 | 99.0                      | MAGNAPIYAILR                 | ITRAQ4plex@N-term; Dimethyl(R)@12                    |                                  |                    | 0.03               | 1460.86 | 731.44   | 1460.83  | 731.42    | 2       | 253.7    |          |
| 83.7  | A0QYW6 | MSMEG_3811 | 98.0                      | LIATAYFPQSEDSR               | ITRAQ4plex@N-term                                    |                                  | cleaved L-I@N-term | 0.00               | 1740.88 | 581.30   | 1740.88  | 581.30    | 3       | 39.1     |          |
| 83.7  | A0QYW6 | MSMEG_3811 | 97.0                      | AGQIAAASN                    | ITRAQ4plex@N-term                                    |                                  | cleaved N-A@C-term | 0.01               | 945.51  | 473.76   | 945.50   | 473.76    | 2       | 19.6     |          |
| 83.7  | A0QYW6 | MSMEG_3811 | 97.0                      | SKTDVLVHTS                   | ITRAQ4plex@N-term; Lys->Gln@2                        |                                  | missed K-T@2       | 0.05               | 1342.77 | 448.60   | 1342.72  | 448.58    | 3       | 289.2    |          |
| 4     | 79.1   | A0R6E3     | MSMEG_6518                | 99.0                         | AAVVLGSLR                                            | ITRAQ4plex@N-term                |                    |                    | 0.00    | 1028.65  | 515.33   | 1028.65   | 515.33  | 2        | 19,250.4 |
| 79.1  | A0R6E3 | MSMEG_6518 | 99.0                      | ATPSVIVALSQVR                | ITRAQ4plex@N-term                                    |                                  |                    | -0.05              | 1412.80 | 707.41   | 1412.85  | 707.43    | 2       | 3,145.3  |          |
| 79.1  | A0R6E3 | MSMEG_6518 | 99.0                      | DLIEAVEAEEPATEAETAIK         | ITRAQ4plex@N-term; ITRAQ4plex(T)@17; Lys->Gln@21     |                                  |                    | -0.01              | 2544.26 | 849.09   | 2544.27  | 849.10    | 3       | 266.3    |          |
| 79.1  | A0R6E3 | MSMEG_6518 | 99.0                      | LQGSLEAAASR                  | ITRAQ4plex@N-term; Ser->Asp@10                       |                                  |                    | 0.05               | 1273.72 | 637.87   | 1273.67  | 637.84    | 2       | 4,299.1  |          |
| 79.1  | A0R6E3 | MSMEG_6518 | 99.0                      | LTAEAAANGIGVR                | ITRAQ4plex@N-term; Deamidated(N)@8                   |                                  |                    | 0.03               | 1416.80 | 709.41   | 1416.77  | 709.39    | 2       | 6,203.2  |          |
| 79.1  | A0R6E3 | MSMEG_6518 | 99.0                      | TRYDELMTTAAEGPGATLGQR        | ITRAQ4plex@N-term; Gln->Arg@20                       |                                  | missed R-Y@2       | -0.03              | 2409.19 | 804.07   | 2409.22  | 804.08    | 3       | 122.2    |          |
| 79.1  | A0R6E3 | MSMEG_6518 | 99.0                      | ATPSVIVALSQVR                | ITRAQ4plex@N-term                                    |                                  |                    | -0.02              | 1412.83 | 707.42   | 1412.85  | 707.43    | 2       | 533.6    |          |
| 79.1  | A0R6E3 | MSMEG_6518 | 99.0                      | ATPSVIVALSQVR                | ITRAQ4plex@N-term; Dimethyl(R)@13                    |                                  |                    | 0.00               | 1440.88 | 721.45   | 1440.88  | 721.45    | 2       | 1,341.3  |          |
| 79.1  | A0R6E3 | MSMEG_6518 | 99.0                      | LQGSLEAAASR                  | ITRAQ4plex@N-term                                    |                                  |                    | 0.04               | 1245.72 | 623.87   | 1245.68  | 623.85    | 2       | 10,732.8 |          |
| 79.1  | A0R6E3 | MSMEG_6518 | 99.0                      | LTAEAAANGIGVR                | ITRAQ4plex@N-term; Deamidated(N)@8                   |                                  |                    | 0.03               | 1416.80 | 709.41   | 1416.77  | 709.39    | 2       | 5,261.9  |          |
| 79.1  | A0R6E3 | MSMEG_6518 | 99.0                      | TRYDELMTTAAEGPGATLGQR        | ITRAQ4plex@N-term                                    |                                  | missed R-Y@2       | 0.05               | 2381.22 | 794.75   | 2381.18  | 794.73    | 3       | 87.7     |          |
| 79.1  | A0R6E3 | MSMEG_6518 | 99.0                      | TRYDELMTTAAEGPGATLGQR        | ITRAQ4plex@N-term                                    |                                  | missed R-Y@2       | 0.05               | 2381.22 | 794.75   | 2381.18  | 794.73    | 3       | 590.5    |          |
| 79.1  | A0R6E3 | MSMEG_6518 | 99.0                      | TRYDELMTTAAEGPGATLGQR        | No ITRAQ4plex@N-term                                 |                                  | missed R-Y@2       | -0.02              | 2237.06 | 746.69   | 2237.07  | 746.70    | 3       | 89.7     |          |
| 79.1  | A0R6E3 | MSMEG_6518 | 97.0                      | KLQGSLEAAASR                 | ITRAQ4plex@N-term; Lys->Gln@1                        |                                  | missed K-L@1       | 0.04               | 1373.78 | 458.93   | 1373.74  | 458.92    | 3       | 384.3    |          |
| 79.1  | A0R6E3 | MSMEG_6518 | 87.0                      | KLQGSLEAAASR                 | ITRAQ4plex@N-term; User modH on Lys(K)@1             |                                  | missed K-L@1       | 0.04               | 1616.93 | 539.98   | 1616.88  | 539.97    | 3       |          |          |
| 5     | 79.0   | A0R2W6     | MSMEG_5258                | 99.0                         | IEPIEVMTFDGDGR                                       | ITRAQ4plex@N-term                |                    |                    | 0.03    | 1721.87  | 861.94   | 1721.84   | 861.93  | 2        | 3,686.7  |
| 79.0  | A0R2W6 | MSMEG_5258 | 99.0                      | SHDAALESFVK                  | ITRAQ4plex@N-term; Lys->Gln@12                       |                                  | cleaved M-S@N-term | 0.04               | 1417.74 | 473.59   | 1417.70  | 473.57    | 3       | 317.3    |          |
| 79.0  | A0R2W6 | MSMEG_5258 | 99.0                      | YLDTVAGGSAADIAALYADDATVEDPVG | ITRAQ4plex@N-term                                    |                                  |                    | -0.02              | 3718.79 | 930.71   | 3718.81  | 930.71    | 4       | 158.9    |          |
| 79.0  | A0R2W6 | MSMEG_5258 | 99.0                      | IEPIEVMTFDGDGR               | ITRAQ4plex@N-term; Dimethyl(R)@14                    |                                  |                    | 0.00               | 1749.87 | 875.94   | 1749.87  | 875.94    | 2       | 707.9    |          |
| 79.0  | A0R2W6 | MSMEG_5258 | 97.0                      | AYWSPADIK                    | ITRAQ4plex@N-term; Lys->Gln@9                        |                                  |                    | 0.04               | 1193.63 | 597.82   | 1193.58  | 597.80    | 2       | 270.3    |          |
| 6     | 79.0   | A0R647     | MSMEG_6422                | 99.0                         | AGSNLFHIEDFVAR                                       | No ITRAQ4plex@N-term; Gly->Pro@2 |                    |                    | -0.02   | 1614.79  | 539.27   | 1614.82   | 539.28  | 3        | 54.4     |
| 79.0  | A0R647 | MSMEG_6422 | 99.0                      | DALALALDQER                  | ITRAQ4plex@N-term; Gln->Arg@9                        |                                  |                    | -0.02              | 1385.75 | 693.88   | 1385.77  | 693.89    | 2       | 1,244.7  |          |
| 79.0  | A0R647 | MSMEG_6422 | 99.0                      | DEGDHLGEQFMQWF               | ITRAQ4plex@N-term                                    |                                  | cleaved F-L@C-term | 0.02               | 1881.83 | 941.92   | 1881.81  | 941.91    | 2       | 329.2    |          |
| 79.0  | A0R647 | MSMEG_6422 | 99.0                      | DEGDHLGEQFMQWFLK             | ITRAQ4plex@N-term; Lys->Gln@16                       |                                  |                    | 0.06               | 2123.02 | 708.68   | 2122.95  | 708.66    | 3       | 78.2     |          |
| 79.0  | A0R647 | MSMEG_6422 | 99.0                      | DVEVEIPIGIDPVCNNFTTPR        | ITRAQ4plex@N-term; Pyridylethyl(C)@13                |                                  |                    | 0.04               | 2463.26 | 822.09   | 2463.22  | 822.08    | 3       | 181.8    |          |
| 79.0  | A0R647 | MSMEG_6422 | 99.0                      | EMSAAGADPTAPR                | ITRAQ4plex@N-term                                    |                                  |                    | 0.03               | 1416.71 | 709.36   | 1416.68  | 709.35    | 2       | 803.2    |          |
| 79.0  | A0R647 | MSMEG_6422 | 99.0                      | EQVEEVAAMTTLVR               | ITRAQ4plex@N-term                                    |                                  |                    | 0.04               | 1718.94 | 860.48   | 1718.90  | 860.46    | 2       | 628.6    |          |
| 79.0  | A0R647 | MSMEG_6422 | 99.0                      | MLVQYLLDR                    | ITRAQ4plex@N-term                                    |                                  | cleaved M-M@N-term | 0.00               | 1293.72 | 647.87   | 1293.72  | 647.87    | 2       | 1,071.8  |          |
| 79.0  | A0R647 | MSMEG_6422 | 99.0                      | NHAMMLVQYLLDR                | ITRAQ4plex@N-term                                    |                                  |                    | 0.00               | 1746.90 | 583.31   | 1746.90  | 583.31    | 3       | 882.8    |          |
| 79.0  | A0R647 | MSMEG_6422 | 99.0                      | AGSNLFHIEDFVAR               | ITRAQ4plex@N-term                                    |                                  |                    | -0.02              | 1718.87 | 573.96   | 1718.89  | 573.97    | 3       | 254.8    |          |
| 79.0  | A0R647 | MSMEG_6422 | 99.0                      | AGSNLFHIEDFVAR               | ITRAQ4plex@N-term; Deamidated(N)@4; Deamidated(R)@14 |                                  |                    | 0.06               | 1720.92 | 574.65   | 1720.85  | 574.63    | 3       | 830.5    |          |
| 79.0  | A0R647 | MSMEG_6422 | 99.0                      | AGSNLFHIEDFVAR               | ITRAQ4plex@N-term; Ala->Val@13                       |                                  |                    | -0.01              | 1746.91 | 583.31   | 1746.92  | 583.31    | 3       | 242.4    |          |
| 79.0  | A0R647 | MSMEG_6422 | 99.0                      | AGSNLFHIEDFVAR               | ITRAQ4plex@N-term; Deamidated(N)@4                   |                                  |                    | 0.01               | 1719.88 | 574.30   | 1719.87  | 574.30    | 3       | 32.6     |          |
| 79.0  | A0R647 | MSMEG_6422 | 99.0                      | AGSNLFHIEDFVAR               | No ITRAQ4plex@N-term                                 |                                  |                    | 0.01               | 1574.79 | 525.94   | 1574.78  | 525.94    | 3       | 46.5     |          |
| 79.0  | A0R647 | MSMEG_6422 | 99.0                      | EQVEEVAAMTTLVR               | ITRAQ4plex@N-term                                    |                                  |                    | 0.00               | 1718.90 | 573.97   | 1718.90  | 573.97    | 3       |          |          |

Supplement Table 1A

| Index | % Cov | Uniprot ID | Gene locus (M. smegmatis) | Conf | Peptide Sequence      | Modifications                                                              | Cleavages                             | ΔMass | Prec MW | Prec m/z | Calc. MW | Calc. m/z | Theor z | Area 115 |
|-------|-------|------------|---------------------------|------|-----------------------|----------------------------------------------------------------------------|---------------------------------------|-------|---------|----------|----------|-----------|---------|----------|
|       | 79.0  | A0R647     | MSMEG_6422                | 99.0 | EQVEEVAAMTTLVR        | iTRAQ4plex@N-term; Dehydrated(T)@10                                        |                                       | 0.00  | 1700.89 | 567.97   | 1700.89  | 567.97    | 3       |          |
|       | 79.0  | A0R647     | MSMEG_6422                | 99.0 | EQVEEVAAMTTLVR        | iTRAQ4plex@N-term                                                          |                                       | 0.01  | 1718.91 | 573.98   | 1718.90  | 573.97    | 3       |          |
|       | 79.0  | A0R647     | MSMEG_6422                | 98.0 | MLVQYLLDR             | iTRAQ4plex@N-term                                                          | cleaved M-M@N-term                    | 0.00  | 1293.72 | 647.87   | 1293.72  | 647.87    | 2       | 173.3    |
|       | 79.0  | A0R647     | MSMEG_6422                | 98.0 | TVTEQISR              | iTRAQ4plex@N-term                                                          |                                       | -0.01 | 1076.58 | 539.30   | 1076.59  | 539.30    | 2       | 1,265.9  |
|       | 79.0  | A0R647     | MSMEG_6422                | 94.0 | EQVEEVAAMTTLVR        | iTRAQ4plex@N-term; Ala->Ser@7                                              |                                       | 0.01  | 1734.90 | 579.31   | 1734.89  | 579.31    | 3       | 32.6     |
|       | 79.0  | A0R647     | MSMEG_6422                | 77.0 | LVQYLLDR              | iTRAQ4plex@N-term                                                          | cleaved M-L@N-term                    | -0.02 | 1162.67 | 582.34   | 1162.68  | 582.35    | 2       | 410.0    |
| 7     | 74.6  | A0QSH8     | MSMEG_1484                | 99.0 | LSEKLGIPQISTGDLFR     | iTRAQ4plex@N-term; iTRAQ4plex(S)@2; User modH on Lys(K)@4                  | missed K-L@4                          | -0.03 | 2404.31 | 802.44   | 2404.34  | 802.46    | 3       | 997.1    |
|       | 74.6  | A0QSH8     | MSMEG_1484                | 99.0 | ADDTDEVIR             | iTRAQ4plex@N-term                                                          |                                       | 0.03  | 1176.60 | 589.31   | 1176.57  | 589.29    | 2       | 1,081.0  |
|       | 74.6  | A0QSH8     | MSMEG_1484                | 99.0 | IDQPDAAEGFILDGYPR     | iTRAQ4plex@N-term                                                          |                                       | -0.01 | 2020.00 | 674.34   | 2020.00  | 674.34    | 3       | 144.0    |
|       | 74.6  | A0QSH8     | MSMEG_1484                | 99.0 | LDVLEFQVSEDELLTR      | iTRAQ4plex@N-term                                                          |                                       | 0.01  | 2120.13 | 707.72   | 2120.11  | 707.71    | 3       |          |
|       | 74.6  | A0QSH8     | MSMEG_1484                | 99.0 | LGIPQISTGDLFR         | iTRAQ4plex@N-term                                                          |                                       | 0.00  | 1559.88 | 780.95   | 1559.88  | 780.95    | 2       | 382.1    |
|       | 74.6  | A0QSH8     | MSMEG_1484                | 99.0 | NIGDGTPLGLEAK         | iTRAQ4plex@N-term; Lys->Gln@13                                             |                                       | 0.04  | 1427.78 | 714.90   | 1427.74  | 714.88    | 2       | 1,245.2  |
|       | 74.6  | A0QSH8     | MSMEG_1484                | 99.0 | TVNAV GALDEVFAR       | iTRAQ4plex@N-term; Ala->Val@13                                             |                                       | -0.01 | 1632.89 | 817.45   | 1632.90  | 817.46    | 2       | 2,570.6  |
|       | 74.6  | A0QSH8     | MSMEG_1484                | 99.0 | VLLGPPGAGK            | iTRAQ4plex@N-term; Lys->Gln@11                                             |                                       | 0.03  | 1150.71 | 576.36   | 1150.68  | 576.35    | 2       | 684.4    |
|       | 74.6  | A0QSH8     | MSMEG_1484                | 99.0 | TVNAV GALDEVFAR       | iTRAQ4plex@N-term                                                          |                                       | -0.01 | 1604.85 | 803.43   | 1604.86  | 803.44    | 2       | 2,235.3  |
|       | 74.6  | A0QSH8     | MSMEG_1484                | 99.0 | TVNAV GALDEVFAR       | iTRAQ4plex@N-term                                                          |                                       | 0.03  | 1604.89 | 535.97   | 1604.86  | 535.96    | 3       | 8.7      |
|       | 74.6  | A0QSH8     | MSMEG_1484                | 98.0 | SVEQAGALK             | iTRAQ4plex@N-term; Lys->Gln@9                                              |                                       | 0.03  | 1045.59 | 523.80   | 1045.55  | 523.78    | 2       | 412.5    |
|       | 74.6  | A0QSH8     | MSMEG_1484                | 97.0 | ADDTDEVIR             | iTRAQ4plex@N-term; Dimethyl(R)@9                                           |                                       | 0.02  | 1204.63 | 603.32   | 1204.61  | 603.31    | 2       | 1,053.5  |
|       | 74.6  | A0QSH8     | MSMEG_1484                | 97.0 | IDQPDAAEGFILDGYPR     | iTRAQ4plex@N-term; Dimethyl(R)@17                                          |                                       | 0.00  | 2048.03 | 683.69   | 2048.03  | 683.69    | 3       | 36.9     |
|       | 74.6  | A0QSH8     | MSMEG_1484                | 96.0 | RYLDAGDLVPAELTNR      | iTRAQ4plex@N-term                                                          | missed R-Y@1                          | 0.00  | 1946.03 | 649.68   | 1946.03  | 649.69    | 3       | 22.8     |
|       | 74.6  | A0QSH8     | MSMEG_1484                | 95.0 | SVEQAGALK             | iTRAQ4plex@N-term; Lys->Gln@9                                              |                                       | 0.04  | 1045.59 | 523.80   | 1045.55  | 523.78    | 2       | 532.1    |
|       | 74.6  | A0QSH8     | MSMEG_1484                | 91.0 | LGIPQISTGDLFR         | iTRAQ4plex@N-term                                                          |                                       | -0.02 | 1559.88 | 780.94   | 1559.88  | 780.95    | 2       | 738.6    |
|       | 74.6  | A0QSH8     | MSMEG_1484                | 85.0 | NIGDGTPLGLEAKR        | iTRAQ4plex@N-term; Ala->Val@12; Lys->Ser@13; Deamidated(R)@14              | missed K-R@13                         | 0.04  | 1571.86 | 524.96   | 1571.83  | 524.95    | 3       | 636.2    |
| 8     | 74.2  | A0QVB9     | MSMEG_2520                | 99.0 | NALVEADGDFDKAVELLR    | iTRAQ4plex@N-term; User modH on Lys(K)@12                                  | missed K-A@12                         | -0.06 | 2361.16 | 788.06   | 2361.22  | 788.08    | 3       | 133.1    |
|       | 74.2  | A0QVB9     | MSMEG_2520                | 99.0 | AADLPPAVGVLVLEQAGDADK | iTRAQ4plex@N-term; Val->Leu@12; Deamidated(O)@15; Lys->Gln@21              |                                       | 0.03  | 2257.16 | 753.39   | 2257.12  | 753.38    | 3       | 17.4     |
|       | 74.2  | A0QVB9     | MSMEG_2520                | 99.0 | AAYFDGTVEAYLHK        | iTRAQ4plex@N-term; iTRAQ4plex(H)@13; Lys->Gln@14                           |                                       | 0.02  | 1871.95 | 624.99   | 1871.93  | 624.98    | 3       | 618.4    |
|       | 74.2  | A0QVB9     | MSMEG_2520                | 99.0 | ALLDEAGVTVTR          | iTRAQ4plex@N-term                                                          |                                       | -0.01 | 1387.77 | 694.89   | 1387.78  | 694.90    | 2       | 2,959.4  |
|       | 74.2  | A0QVB9     | MSMEG_2520                | 99.0 | ANYTAADVK             | iTRAQ4plex@N-term; Lys->Gln@9                                              | cleaved M-A@N-term                    | 0.02  | 1095.56 | 548.79   | 1095.53  | 548.77    | 2       | 121.6    |
|       | 74.2  | A0QVB9     | MSMEG_2520                | 99.0 | DEAGVTVTR             | iTRAQ4plex@N-term                                                          | cleaved L-D@N-term                    | 0.02  | 1090.60 | 546.30   | 1090.57  | 546.29    | 2       | 593.7    |
|       | 74.2  | A0QVB9     | MSMEG_2520                | 99.0 | DGALIELNSETDFVAK      | iTRAQ4plex@N-term; Lys->Gln@16                                             |                                       | 0.05  | 1864.97 | 622.66   | 1864.92  | 622.65    | 3       |          |
|       | 74.2  | A0QVB9     | MSMEG_2520                | 99.0 | EAAHAVALQIAALK        | iTRAQ4plex@N-term; Lys->Gln@14                                             |                                       | 0.00  | 1548.88 | 517.30   | 1548.87  | 517.30    | 3       | 149.3    |
|       | 74.2  | A0QVB9     | MSMEG_2520                | 99.0 | EDVPEDIVANER          | iTRAQ4plex@N-term                                                          |                                       | 0.01  | 1528.76 | 765.39   | 1528.75  | 765.38    | 2       | 4,928.2  |
|       | 74.2  | A0QVB9     | MSMEG_2520                | 99.0 | ELTGAGMLDSK           | iTRAQ4plex@N-term; Lys->Arg@11                                             |                                       | 0.04  | 1292.69 | 647.35   | 1292.65  | 647.33    | 2       | 488.5    |
|       | 74.2  | A0QVB9     | MSMEG_2520                | 99.0 | NAEFQALADQIVAAVAAK    | iTRAQ4plex@N-term; Lys->Gln@19                                             |                                       | 0.06  | 2044.13 | 682.38   | 2044.07  | 682.36    | 3       | 41.3     |
|       | 74.2  | A0QVB9     | MSMEG_2520                | 99.0 | NAEFQALADQIVAAVAAKAN  | iTRAQ4plex@N-term; Lys->Ser@19                                             | cleaved N-D@C-term; missed K-A@19     | 0.06  | 2188.18 | 730.40   | 2188.12  | 730.38    | 3       | 295.9    |
|       | 74.2  | A0QVB9     | MSMEG_2520                | 99.0 | NALVEADGDFDKAVELLR    | iTRAQ4plex@N-term; Lys->Gln@12                                             | missed K-A@12                         | -0.02 | 2118.06 | 707.03   | 2118.07  | 707.03    | 3       | 188.7    |
|       | 74.2  | A0QVB9     | MSMEG_2520                | 99.0 | TGDTTVEQAIADLSAK      | iTRAQ4plex@N-term; iTRAQ4plex(S)@14; Lys->Gln@16                           |                                       | -0.01 | 1906.97 | 636.66   | 1906.97  | 636.66    | 3       | 115.0    |
|       | 74.2  | A0QVB9     | MSMEG_2520                | 99.0 | AADLPPAVGVLVLEQAGDADK | iTRAQ4plex@N-term; Lys->Gln@21                                             |                                       | 0.03  | 2242.15 | 748.39   | 2242.12  | 748.38    | 3       | 27.2     |
|       | 74.2  | A0QVB9     | MSMEG_2520                | 99.0 | ALLDEAGVTVTR          | iTRAQ4plex@N-term; Thr->Glu@11                                             |                                       | 0.05  | 1415.82 | 708.92   | 1415.77  | 708.89    | 2       | 776.7    |
|       | 74.2  | A0QVB9     | MSMEG_2520                | 99.0 | DGALIELNSETDFVAK      | iTRAQ4plex@N-term; Lys->Gln@16                                             |                                       | 0.06  | 1864.98 | 622.67   | 1864.92  | 622.65    | 3       | 10.9     |
|       | 74.2  | A0QVB9     | MSMEG_2520                | 99.0 | EAAHAVALQIAALK        | iTRAQ4plex@N-term; Lys->Gln@14                                             |                                       | 0.00  | 1548.88 | 517.30   | 1548.87  | 517.30    | 3       | 584.1    |
|       | 74.2  | A0QVB9     | MSMEG_2520                | 99.0 | ELTGAGMLDSK           | iTRAQ4plex@N-term; Lys->Gln@11                                             |                                       | 0.04  | 1264.65 | 633.33   | 1264.61  | 633.31    | 2       | 1,301.2  |
|       | 74.2  | A0QVB9     | MSMEG_2520                | 98.0 | ANYTAADVK             | iTRAQ4plex@N-term; Lys->Gln@9                                              | cleaved M-A@N-term                    | 0.04  | 1095.57 | 548.79   | 1095.53  | 548.77    | 2       | 501.2    |
|       | 74.2  | A0QVB9     | MSMEG_2520                | 98.0 | DGALIELNSETDFVAK      | iTRAQ4plex@N-term; Lys->Gln@16                                             |                                       | 0.05  | 1864.96 | 622.66   | 1864.92  | 622.65    | 3       | 6.5      |
|       | 74.2  | A0QVB9     | MSMEG_2520                | 98.0 | EDVPEDIVANER          | iTRAQ4plex@N-term                                                          |                                       | -0.02 | 1528.73 | 765.37   | 1528.75  | 765.38    | 2       | 259.5    |
|       | 74.2  | A0QVB9     | MSMEG_2520                | 97.0 | AADLPPAVGVLVLEQAGDADK | iTRAQ4plex@N-term; iTRAQ4plex(Y)@14; Lys->Gln@21                           |                                       | -0.04 | 2386.19 | 796.40   | 2386.23  | 796.42    | 3       | 101.5    |
|       | 74.2  | A0QVB9     | MSMEG_2520                | 95.0 | NALVEADGDFDKAVELLRI   | iTRAQ4plex@N-term; User modH on Lys(K)@12; Glu->Gln@15; Dioxidation(R)@18  | cleaved I-K@C-term; missed K-A@12; mi | -0.02 | 2505.28 | 627.33   | 2505.31  | 627.33    | 4       | 101.9    |
|       | 74.2  | A0QVB9     | MSMEG_2520                | 95.0 | NALVEADGDFDKAVELLRI   | iTRAQ4plex@N-term; Oxidation(D)@11; User modH on Lys(K)@12; Carbamyl(R)@18 | cleaved I-K@C-term; missed K-A@12; mi | 0.04  | 2533.34 | 845.45   | 2533.30  | 845.44    | 3       | 1,315.0  |
|       | 74.2  | A0QVB9     | MSMEG_2520                | 87   | IGEKLELR              | iTRAQ4plex@N-term; User modH on Lys(K)@4                                   | missed K-L@4                          | -0.03 | 1343.74 | 448.92   | 1343.77  | 448.93    | 3       | 453.5    |
|       | 74.2  | A0QVB9     | MSMEG_2520                | 81.0 | NAEFQALADQIVAAVAAK    | iTRAQ4plex@N-term; Asp->Asn@9; Lys->Gln@19                                 |                                       | 0.07  | 2043.15 | 682.06   | 2043.09  | 682.04    | 3       | 82.9     |
|       | 74.2  | A0QVB9     | MSMEG_2520                | 78.0 | ATAEGLVAIK            | iTRAQ4plex@N-term; Lys->Arg@10                                             |                                       | 0.02  | 1101.64 | 551.83   | 1101.63  | 551.82    | 2       | 1,667.6  |
| 9     | 71.0  | A0QS98     | MSMEG_1401                | 99.0 | AFDQIDNAPEER          | iTRAQ4plex@N-term                                                          |                                       | 0.01  | 1547.75 | 774.88   | 1547.73  | 774.87    | 2       | 2,318.4  |
|       | 71.0  | A0QS98     | MSMEG_1401                | 99.0 | DQIDNAPEER            | iTRAQ4plex@N-term                                                          | cleaved F-D@N-term                    | 0.03  | 1329.66 | 665.84   | 1329.63  | 665.82    | 2       | 347.7    |
|       | 71.0  | A0QS98     | MSMEG_1401                | 99.0 | ELLAQAQDFDEEAPVVR     | iTRAQ4plex@N-term; Dimethyl(R)@16                                          |                                       | 0.02  | 1973.05 | 658.69   | 1973.02  | 658.68    | 3       | 206.8    |
|       | 71.0  | A0QS98     | MSMEG_1401                | 99.0 | ETDKPFLMPVEDVFTITGR   | iTRAQ4plex@N-term; Lys->Gln@4                                              |                                       | 0.04  | 2338.20 | 780.41   | 2338.16  | 780.40    | 3       | 60.8     |
|       | 71.0  | A0QS98     | MSMEG_1401                | 99.0 | FDQIDNAPEER           | iTRAQ4plex@N-term                                                          | cleaved A-F@N-term                    | 0.03  | 1476.73 | 739.37   | 1476.70  | 739.36    | 2       | 1,485.0  |
|       | 71.0  | A0QS98     | MSMEG_1401                | 99.0 | GITINISHVEYQTDKR      | iTRAQ4plex@N-term; Lys->Gln@15                                             | missed K-R@15                         | 0.05  | 2017.08 | 505.28   | 2017.04  | 505.27    | 4       | 220.4    |
|       | 71.0  | A0QS98     | MSMEG_1401                | 99.0 | GVINNVNEEIVGIRPETTK   | iTRAQ4plex@N-term; iTRAQ4plex(T)@19; Lys->Gln@20                           |                                       | 0.00  | 2483.34 | 828.79   | 2483.35  | 828.79    | 3       | 266.3    |

Supplement Table 1A

| Index | % Cov  | Uniprot ID | Gene locus<br>(M. smegmatis) | Conf                         | Peptide Sequence                                                                     | Modifications                                             | Cleavages          | ΔMass   | Prec MW | Prec m/z | Calc. MW | Calc. m/z | Theor z | Area 115 |
|-------|--------|------------|------------------------------|------------------------------|--------------------------------------------------------------------------------------|-----------------------------------------------------------|--------------------|---------|---------|----------|----------|-----------|---------|----------|
| 71.0  | A0QS98 | MSMEG_1401 | 99.0                         | LIQPVAMDEGLR                 | iTRAQ4plex@N-term; Oxidation(M)@7                                                    |                                                           |                    | 0.00    | 1500.81 | 751.41   | 1500.81  | 751.41    | 2       | 1.415.1  |
| 71.0  | A0QS98 | MSMEG_1401 | 99.0                         | LLDQGQAGDNVGLLLR             | iTRAQ4plex@N-term; Dimethyl(R)@16                                                    |                                                           |                    | -0.03   | 1853.02 | 618.68   | 1853.05  | 618.69    | 3       | 77.1     |
| 71.0  | A0QS98 | MSMEG_1401 | 99.0                         | LMPVEDVFTITGR                | iTRAQ4plex@N-term                                                                    |                                                           | cleaved F-L@N-term | 0.00    | 1620.86 | 811.44   | 1620.87  | 811.44    | 2       | 2.017.7  |
| 71.0  | A0QS98 | MSMEG_1401 | 99.0                         | NMITGAAQMDGAILVVAATDGPMPQTR  | iTRAQ4plex@N-term                                                                    |                                                           |                    | 0.00    | 2872.44 | 958.49   | 2872.44  | 958.49    | 3       | 19.4     |
| 71.0  | A0QS98 | MSMEG_1401 | 99.0                         | SVEELMEAVDASIPDPVR           | iTRAQ4plex@N-term                                                                    |                                                           |                    | 0.03    | 2100.08 | 701.04   | 2100.05  | 701.02    | 3       | 190.5    |
| 71.0  | A0QS98 | MSMEG_1401 | 99.0                         | TTLTAATK                     | iTRAQ4plex@N-term; Lys->Gln@9                                                        |                                                           |                    | 0.04    | 1062.64 | 532.33   | 1062.60  | 532.31    | 2       | 1.014.0  |
| 71.0  | A0QS98 | MSMEG_1401 | 99.0                         | TTVTGVEMFR                   | iTRAQ4plex@N-term                                                                    |                                                           |                    | 0.01    | 1283.68 | 642.85   | 1283.67  | 642.84    | 2       | 5.025.9  |
| 71.0  | A0QS98 | MSMEG_1401 | 99.0                         | VLHDKFPDLNESR                | No iTRAQ4plex@N-term; Lys->Gln@5                                                     |                                                           | missed K-F@5       | 0.05    | 1568.80 | 523.94   | 1568.76  | 523.93    | 3       | 194.5    |
| 71.0  | A0QS98 | MSMEG_1401 | 99.0                         | AFDQIDNAPEER                 | iTRAQ4plex@N-term                                                                    |                                                           |                    | 0.03    | 1547.76 | 774.89   | 1547.73  | 774.87    | 2       | 4.866.2  |
| 71.0  | A0QS98 | MSMEG_1401 | 99.0                         | AFDQIDNAPEER                 | iTRAQ4plex@N-term; Dimethyl(R)@12                                                    |                                                           |                    | 0.02    | 1575.78 | 788.90   | 1575.77  | 788.89    | 2       | 1.307.7  |
| 71.0  | A0QS98 | MSMEG_1401 | 99.0                         | AFDQIDNAPEER                 | iTRAQ4plex@N-term; Dimethyl(R)@12                                                    |                                                           |                    | 0.02    | 1575.78 | 788.90   | 1575.77  | 788.89    | 2       | 4.295.8  |
| 71.0  | A0QS98 | MSMEG_1401 | 99.0                         | ETDKPFLMPVEDVFTITGR          | iTRAQ4plex@N-term; iTRAQ4plex(T)@2; Lys->Gln@4; Oxidation(M)@8                       |                                                           |                    | 0.08    | 2498.34 | 833.79   | 2498.26  | 833.76    | 3       | 239.3    |
| 71.0  | A0QS98 | MSMEG_1401 | 99.0                         | ETDKPFLMPVEDVFTITGR          | iTRAQ4plex@N-term; iTRAQ4plex(T)@2; Lys->Gln@4                                       |                                                           |                    | 0.06    | 2482.32 | 828.45   | 2482.27  | 828.43    | 3       | 806.3    |
| 71.0  | A0QS98 | MSMEG_1401 | 99.0                         | ETDKPFLMPVEDVFTITGR          | iTRAQ4plex@N-term; Lys->Gln@4                                                        |                                                           |                    | 0.00    | 2338.16 | 780.39   | 2338.16  | 780.40    | 3       | 147.4    |
| 71.0  | A0QS98 | MSMEG_1401 | 99.0                         | GITINISHVEYQTDKR             | iTRAQ4plex@N-term; Lys->Gln@15                                                       |                                                           | missed K-R@15      | 0.05    | 2017.08 | 505.28   | 2017.04  | 505.27    | 4       | 348.7    |
| 71.0  | A0QS98 | MSMEG_1401 | 99.0                         | GVINVNEEIVGIRPETTK           | iTRAQ4plex@N-term; Ile->Asn@11; Lys->Gln@20                                          |                                                           |                    | 0.08    | 2340.29 | 781.10   | 2340.20  | 781.08    | 3       | 426.6    |
| 71.0  | A0QS98 | MSMEG_1401 | 99.0                         | LIQPVAMDEGLR                 | iTRAQ4plex@N-term                                                                    |                                                           |                    | 0.00    | 1484.82 | 743.42   | 1484.81  | 743.41    | 2       | 1.437.2  |
| 71.0  | A0QS98 | MSMEG_1401 | 99.0                         | LIQPVAMDEGLR                 | iTRAQ4plex@N-term; Dimethyl(R)@12                                                    |                                                           |                    | -0.03   | 1512.82 | 757.42   | 1512.85  | 757.43    | 2       | 1.853.1  |
| 71.0  | A0QS98 | MSMEG_1401 | 99.0                         | LLDQGQAGDNVGLLLR             | iTRAQ4plex@N-term                                                                    |                                                           |                    | 0.01    | 1825.03 | 913.52   | 1825.02  | 913.52    | 2       | 4.105.4  |
| 71.0  | A0QS98 | MSMEG_1401 | 99.0                         | LLDQGQAGDNVGLLLR             | iTRAQ4plex@N-term; Deamidated(Q)@4; Leu->Asn@13                                      |                                                           |                    | 0.12    | 1827.08 | 610.03   | 1828.96  | 609.99    | 3       | 1.231.6  |
| 71.0  | A0QS98 | MSMEG_1401 | 99.0                         | LLDQGQAGDNVGLLLR             | iTRAQ4plex@N-term; Dimethyl(R)@16                                                    |                                                           |                    | -0.01   | 1853.04 | 618.69   | 1853.05  | 618.69    | 3       | 87.7     |
| 71.0  | A0QS98 | MSMEG_1401 | 99.0                         | LLDQGQAGDNVGLLLR             | iTRAQ4plex@N-term                                                                    |                                                           |                    | -0.01   | 1825.01 | 609.34   | 1825.02  | 609.35    | 3       | 52.9     |
| 71.0  | A0QS98 | MSMEG_1401 | 99.0                         | NMITGAAQMDGAILVVAATDGPMPQTR  | iTRAQ4plex@N-term                                                                    |                                                           |                    | -0.05   | 2872.38 | 958.47   | 2872.44  | 958.49    | 3       | 32.1     |
| 71.0  | A0QS98 | MSMEG_1401 | 99.0                         | SVEELMEAVDASIPDPVR           | iTRAQ4plex@N-term                                                                    |                                                           |                    | 0.04    | 2100.09 | 701.04   | 2100.05  | 701.02    | 3       | 18.5     |
| 71.0  | A0QS98 | MSMEG_1401 | 99.0                         | TTVTGVEMFR                   | iTRAQ4plex@N-term; Dimethyl(R)@10                                                    |                                                           |                    | 0.00    | 1311.70 | 656.86   | 1311.70  | 656.86    | 2       | 4.030.4  |
| 71.0  | A0QS98 | MSMEG_1401 | 99.0                         | TTVTGVEMFR                   | iTRAQ4plex@N-term; Dimethyl(R)@10                                                    |                                                           |                    | -0.01   | 1311.69 | 656.85   | 1311.70  | 656.86    | 2       | 575.6    |
| 71.0  | A0QS98 | MSMEG_1401 | 97.0                         | ELLAAQDFDEEAPVVR             | iTRAQ4plex@N-term; Asp->Gln@7                                                        |                                                           |                    | -0.07   | 1957.95 | 653.66   | 1958.02  | 653.68    | 3       | 15.2     |
| 71.0  | A0QS98 | MSMEG_1401 | 97.0                         | ELLAAQDFDEEAPVVR             | iTRAQ4plex@N-term; Dimethyl(R)@16                                                    |                                                           |                    | 0.01    | 1973.04 | 658.69   | 1973.02  | 658.68    | 3       | 14.1     |
| 71.0  | A0QS98 | MSMEG_1401 | 95.0                         | TTLTAATK                     | iTRAQ4plex@N-term; iTRAQ4plex(T)@8; Lys->Gln@9                                       |                                                           |                    | 0.03    | 1206.74 | 604.38   | 1206.71  | 604.36    | 2       | 9.540.5  |
| 71.0  | A0QS98 | MSMEG_1401 | 94.0                         | WVKSVEELMEAVDASIPDPVR        | iTRAQ4plex@N-term; iTRAQ4plex(S)@4; Asp->Asn@18                                      |                                                           | missed K-S@3       | -0.07   | 2899.45 | 725.87   | 2899.52  | 725.89    | 4       | 5.4      |
| 71.0  | A0QS98 | MSMEG_1401 | 93.0                         | LIQPVAMDEGLR                 | iTRAQ4plex@N-term; Dimethyl(R)@12                                                    |                                                           |                    | 0.00    | 1512.85 | 757.43   | 1512.85  | 757.43    | 2       | 2.680.5  |
| 71.0  | A0QS98 | MSMEG_1401 | 92.0                         | TTDVTGVVTLPEGTEMVMPGNDTDSIVI | iTRAQ4plex@N-term; iTRAQ4plex(S)@26; Lys->Gln@28                                     |                                                           |                    | -0.06   | 3193.50 | 1065.51  | 3193.56  | 1065.53   | 3       | 164.0    |
| 71.0  | A0QS98 | MSMEG_1401 | 91.0                         | TTLTAATK                     | iTRAQ4plex@N-term; Lys->Arg@9                                                        |                                                           |                    | 0.01    | 1090.66 | 546.34   | 1090.65  | 546.33    | 2       | 391.9    |
| 71.0  | A0QS98 | MSMEG_1401 | 89.0                         | FPDLNESR                     | iTRAQ4plex@N-term                                                                    |                                                           |                    | 0.02    | 1120.58 | 561.30   | 1120.56  | 561.29    | 2       | 7.407.6  |
| 10    | 68.7   | A0R0B3     | MSMEG_4326                   | 99.0                         | YGVKIPDEDLAGLR                                                                       | iTRAQ4plex@N-term; iTRAQ4plex(Y)@1; User modH on Lys(K)@4 | missed K-I@4       | 0.01    | 2076.15 | 693.06   | 2076.13  | 693.05    | 3       | 789.5    |
| 68.7  | A0R0B3 | MSMEG_4326 | 99.0                         | TVGDVVAYIQKLEENPEAAAAALR     | No iTRAQ4plex@N-term; iTRAQ4plex(Y)@8; User modH on Lys(K)@11                        | missed K-L@11                                             | -0.02              | 2972.53 | 744.14  | 2972.55  | 744.14   | 4         | 89.6    |          |
| 68.7  | A0R0B3 | MSMEG_4326 | 99.0                         | TVGDVVAYIQKLEENPEAAAAALR     | iTRAQ4plex@N-term; iTRAQ4plex(Y)@8; Deamidated(Q)@10; User modH on Lys(K)@11; Dehydr | missed K-L@11                                             | 0.02               | 3099.64 | 775.92  | 3099.62  | 775.91   | 4         | 75.9    |          |
| 68.7  | A0R0B3 | MSMEG_4326 | 99.0                         | IPDEDLAGLR                   | iTRAQ4plex@N-term                                                                    |                                                           |                    | 0.01    | 1241.68 | 621.85   | 1241.67  | 621.84    | 2       | 7.244.4  |
| 68.7  | A0R0B3 | MSMEG_4326 | 99.0                         | LEENPEAAAAALR                | iTRAQ4plex@N-term                                                                    |                                                           |                    | 0.00    | 1555.79 | 778.90   | 1555.80  | 778.91    | 2       | 3.995.2  |
| 68.7  | A0R0B3 | MSMEG_4326 | 99.0                         | IPDEDLAGLR                   | iTRAQ4plex@N-term                                                                    |                                                           |                    | 0.00    | 1241.68 | 621.85   | 1241.67  | 621.84    | 2       | 1.246.9  |
| 68.7  | A0R0B3 | MSMEG_4326 | 99.0                         | IPDEDLAGLR                   | iTRAQ4plex@N-term                                                                    |                                                           |                    | 0.00    | 1241.67 | 621.84   | 1241.67  | 621.84    | 2       | 2.217.8  |
| 68.7  | A0R0B3 | MSMEG_4326 | 99.0                         | LEENPEAAAAALR                | iTRAQ4plex@N-term; Ala->Val@10                                                       |                                                           |                    | 0.00    | 1583.82 | 792.92   | 1583.83  | 792.92    | 2       | 1.494.1  |
| 68.7  | A0R0B3 | MSMEG_4326 | 84.0                         | IPDEDLAGLR                   | iTRAQ4plex@N-term; Dimethyl(R)@10                                                    |                                                           |                    | -0.02   | 1269.69 | 635.85   | 1269.71  | 635.86    | 2       | 1.462.4  |
| 11    | 66.4   | A0QYD4     | MSMEG_3619                   | 99.0                         | AALSDWTAGQADFFGTR                                                                    | iTRAQ4plex@N-term                                         |                    | -0.01   | 1956.93 | 653.32   | 1956.95  | 653.32    | 3       | 131.9    |
| 66.4  | A0QYD4 | MSMEG_3619 | 99.0                         | DAGHNVVIAGAR                 | iTRAQ4plex@N-term                                                                    |                                                           |                    | 0.02    | 1322.74 | 441.92   | 1322.72  | 441.91    | 3       | 427.3    |
| 66.4  | A0QYD4 | MSMEG_3619 | 99.0                         | GITINAVAAAGR                 | iTRAQ4plex@N-term                                                                    |                                                           |                    | 0.00    | 1185.69 | 593.85   | 1185.70  | 593.85    | 2       | 7.916.8  |
| 66.4  | A0QYD4 | MSMEG_3619 | 99.0                         | LALFLSTPAAR                  | iTRAQ4plex@N-term                                                                    |                                                           |                    | -0.03   | 1302.75 | 652.38   | 1302.78  | 652.40    | 2       | 725.9    |
| 66.4  | A0QYD4 | MSMEG_3619 | 99.0                         | SAEQAYDGLTR                  | iTRAQ4plex@N-term                                                                    |                                                           |                    | 0.01    | 1353.67 | 677.84   | 1353.66  | 677.84    | 2       | 424.1    |
| 66.4  | A0QYD4 | MSMEG_3619 | 99.0                         | SGGSIVNVLPESAK               | iTRAQ4plex@N-term; Lys->Gln@14                                                       |                                                           |                    | 0.03    | 1500.82 | 751.42   | 1500.79  | 751.40    | 2       | 1.560.8  |
| 66.4  | A0QYD4 | MSMEG_3619 | 99.0                         | TPPSVADEFTR                  | iTRAQ4plex@N-term                                                                    |                                                           |                    | -0.01   | 1362.68 | 682.35   | 1362.69  | 682.35    | 2       | 1.678.5  |
| 66.4  | A0QYD4 | MSMEG_3619 | 99.0                         | TYTLADLASAWR                 | iTRAQ4plex@N-term                                                                    |                                                           |                    | 0.00    | 1510.79 | 756.40   | 1510.79  | 756.40    | 2       | 2.561.5  |
| 66.4  | A0QYD4 | MSMEG_3619 | 99.0                         | TPPSVADEFTR                  | iTRAQ4plex@N-term                                                                    |                                                           |                    | 0.00    | 1362.69 | 682.35   | 1362.69  | 682.35    | 2       | 4.094.3  |
| 66.4  | A0QYD4 | MSMEG_3619 | 94.0                         | AIAGGFR                      | iTRAQ4plex@N-term                                                                    |                                                           |                    | 0.01    | 905.53  | 453.77   | 905.52   | 453.77    | 2       | 3.651.2  |
| 66.4  | A0QYD4 | MSMEG_3619 | 91.0                         | SGGSIVNVLPESAK               | iTRAQ4plex@N-term; iTRAQ4plex(S)@12; Lys->Gln@14                                     |                                                           |                    | 0.03    | 1644.92 | 549.32   | 1644.89  | 549.30    | 3       | 418.9    |
| 66.4  | A0QYD4 | MSMEG_3619 | 87.0                         | RDDLEVAEK                    | iTRAQ4plex@N-term; Lys->Gln@9                                                        |                                                           | missed R-D@1       | 0.04    | 1159.64 | 387.55   | 1159.60  | 387.54    | 3       | 18.3     |
| 66.4  | A0QYD4 | MSMEG_3619 | 79.0                         | TPPSVADEFTR                  | iTRAQ4plex@N-term; Thr->Glu@10                                                       |                                                           |                    | 0.05    | 1390.73 | 696.37   | 1390.69  | 696.35    | 2       | 1.329.4  |
| 12    | 65.0   | A0QSS4     | MSMEG_1583                   | 99.0                         | AADAVSEALLASATPVDDKK                                                                 | iTRAQ4plex@N-term; Lys->Gln@19; Lys->Arg@20               | missed K-K@19      | 0.05    | 2143.14 | 715.39   | 2143.09  | 715.37    | 3       | 270.5    |
| 65.0  | A0QSS4 | MSMEG_1583 | 99.0                         | AAVEEIVTGGGAALVQAR           | iTRAQ4plex@N-term                                                                    |                                                           |                    | -0.02   | 1912.03 | 638.35   | 1912.05  | 638.36    | 3       | 247.0    |

Supplement Table 1A

| Index | % Cov  | Uniprot ID | Gene locus<br>(M. smegmatis) | Conf                    | Peptide Sequence                                 | Modifications | Cleavages          | ΔMass | Prec MW | Prec m/z | Calc. MW | Calc. m/z | Theor z | Area 115 |
|-------|--------|------------|------------------------------|-------------------------|--------------------------------------------------|---------------|--------------------|-------|---------|----------|----------|-----------|---------|----------|
| 65.0  | A0QSS4 | MSMEG_1583 | 99.0                         | AFLDDLAIVTGGQVNPVGLLLR  | ITRAQ4plex@N-term                                |               |                    | 0.00  | 2638.48 | 880.50   | 2638.48  | 880.50    | 3       | 102.5    |
| 65.0  | A0QSS4 | MSMEG_1583 | 99.0                         | AIAQVATVSSR             | ITRAQ4plex@N-term                                |               |                    | 0.02  | 1245.74 | 623.88   | 1245.72  | 623.87    | 2       | 11,103.3 |
| 65.0  | A0QSS4 | MSMEG_1583 | 99.0                         | AMEAGVDK                | ITRAQ4plex@N-term; Lys->Gln@8                    |               |                    | 0.05  | 963.50  | 482.76   | 963.45   | 482.73    | 2       | 85.7     |
| 65.0  | A0QSS4 | MSMEG_1583 | 99.0                         | DEQVGLVGEAMTK           | ITRAQ4plex@N-term; Lys->Gln@14                   |               |                    | 0.06  | 1648.83 | 825.42   | 1648.77  | 825.39    | 2       | 1,278.8  |
| 65.0  | A0QSS4 | MSMEG_1583 | 99.0                         | DSTVIVDGGGTAEAIADR      | ITRAQ4plex@N-term                                |               |                    | -0.02 | 1889.92 | 630.98   | 1889.95  | 630.99    | 3       | 90.1     |
| 65.0  | A0QSS4 | MSMEG_1583 | 99.0                         | EAVEDAVAAAK             | ITRAQ4plex@N-term; Lys->Gln@11                   |               |                    | 0.04  | 1216.65 | 609.33   | 1216.61  | 609.31    | 2       | 1,145.9  |
| 65.0  | A0QSS4 | MSMEG_1583 | 99.0                         | EVGLEVLGSAR             | ITRAQ4plex@N-term                                |               |                    | 0.01  | 1272.73 | 637.37   | 1272.72  | 637.37    | 2       | 2,282.2  |
| 65.0  | A0QSS4 | MSMEG_1583 | 99.0                         | FVTFDFDSQEAILEDALVLLHR  | ITRAQ4plex@N-term                                |               | cleaved Y-F@N-term | 0.01  | 2560.34 | 854.45   | 2560.33  | 854.45    | 3       | 20.7     |
| 65.0  | A0QSS4 | MSMEG_1583 | 99.0                         | GGGAALVQAR              | ITRAQ4plex@N-term                                |               | cleaved T-G@N-term | 0.03  | 1042.63 | 522.32   | 1042.60  | 522.31    | 2       | 172.1    |
| 65.0  | A0QSS4 | MSMEG_1583 | 99.0                         | GQGFAATLEFGDLVSAGVVDPAK | ITRAQ4plex@N-term; Oxidation(D)@13; Lys->Arg@24  |               |                    | 0.03  | 2550.31 | 851.11   | 2550.28  | 851.10    | 3       | 8.7      |
| 65.0  | A0QSS4 | MSMEG_1583 | 99.0                         | IAQVATVSSR              | ITRAQ4plex@N-term                                |               | cleaved A-I@N-term | 0.03  | 1174.71 | 588.36   | 1174.68  | 588.35    | 2       | 3,472.8  |
| 65.0  | A0QSS4 | MSMEG_1583 | 99.0                         | ISSLPDLLPPLLEK          | ITRAQ4plex@N-term; Lys->Arg@13                   |               |                    | 0.03  | 1608.99 | 805.50   | 1608.96  | 805.49    | 2       | 1,498.6  |
| 65.0  | A0QSS4 | MSMEG_1583 | 99.0                         | NVAAGANPIALGSGISK       | ITRAQ4plex@N-term; ITRAQ4plex(S)@16; Lys->Gln@17 |               |                    | 0.03  | 1827.04 | 610.02   | 1827.01  | 610.01    | 3       | 1,396.4  |
| 65.0  | A0QSS4 | MSMEG_1583 | 99.0                         | QIEFNETAR               | ITRAQ4plex@N-term; Deamidated(N)@5               |               |                    | -0.01 | 1251.61 | 626.81   | 1251.62  | 626.82    | 2       | 1,405.4  |
| 65.0  | A0QSS4 | MSMEG_1583 | 99.0                         | SEIETTDSDWDR            | ITRAQ4plex@N-term                                |               |                    | 0.00  | 1596.70 | 799.36   | 1596.70  | 799.36    | 2       | 7,847.1  |
| 65.0  | A0QSS4 | MSMEG_1583 | 99.0                         | SEIETTDSDWDREK          | ITRAQ4plex@N-term; Lys->Arg@14                   |               | missed R-E@12      | 0.07  | 1881.91 | 628.31   | 1881.85  | 628.29    | 3       | 532.4    |
| 65.0  | A0QSS4 | MSMEG_1583 | 99.0                         | SFGGPQVNDGVTIAR         | ITRAQ4plex@N-term                                |               |                    | 0.02  | 1761.93 | 881.97   | 1761.91  | 881.96    | 2       | 606.5    |
| 65.0  | A0QSS4 | MSMEG_1583 | 99.0                         | VGAATETDLK              | ITRAQ4plex@N-term; Lys->Arg@10                   |               |                    | 0.04  | 1175.66 | 588.84   | 1175.63  | 588.82    | 2       | 2,050.6  |
| 65.0  | A0QSS4 | MSMEG_1583 | 99.0                         | VGLEVLGSAR              | ITRAQ4plex@N-term                                |               | cleaved E-V@N-term | 0.01  | 1143.68 | 572.85   | 1143.67  | 572.84    | 2       | 6,028.6  |
| 65.0  | A0QSS4 | MSMEG_1583 | 99.0                         | AADAVSEALLASATPVDDK     | ITRAQ4plex@N-term; Lys->Gln@19                   |               |                    | 0.03  | 1987.01 | 663.34   | 1986.99  | 663.34    | 3       |          |
| 65.0  | A0QSS4 | MSMEG_1583 | 99.0                         | AAVEEGIVTGGGAALVQAR     | ITRAQ4plex@N-term                                |               |                    | -0.03 | 1912.02 | 638.35   | 1912.05  | 638.36    | 3       | 67.2     |
| 65.0  | A0QSS4 | MSMEG_1583 | 99.0                         | AAVEEGIVTGGGAALVQAR     | ITRAQ4plex@N-term                                |               |                    | 0.04  | 1912.09 | 638.37   | 1912.05  | 638.36    | 3       | 8.7      |
| 65.0  | A0QSS4 | MSMEG_1583 | 99.0                         | AAVEEGIVTGGGAALVQAR     | ITRAQ4plex@N-term                                |               |                    | -0.02 | 1912.03 | 638.35   | 1912.05  | 638.36    | 3       | 9.2      |
| 65.0  | A0QSS4 | MSMEG_1583 | 99.0                         | AAVEEGIVTGGGAALVQAR     | ITRAQ4plex@N-term                                |               |                    | -0.04 | 1912.01 | 638.34   | 1912.05  | 638.36    | 3       | 6.5      |
| 65.0  | A0QSS4 | MSMEG_1583 | 99.0                         | AAVEEGIVTGGGAALVQAR     | ITRAQ4plex@N-term                                |               |                    | -0.02 | 1912.03 | 638.35   | 1912.05  | 638.36    | 3       | 16.0     |
| 65.0  | A0QSS4 | MSMEG_1583 | 99.0                         | AAVEEGIVTGGGAALVQAR     | ITRAQ4plex@N-term                                |               |                    | -0.02 | 1912.03 | 638.35   | 1912.05  | 638.36    | 3       | 9.5      |
| 65.0  | A0QSS4 | MSMEG_1583 | 99.0                         | AAVEEGIVTGGGAALVQAR     | ITRAQ4plex@N-term                                |               |                    | -0.02 | 1912.03 | 638.35   | 1912.05  | 638.36    | 3       | 7.4      |
| 65.0  | A0QSS4 | MSMEG_1583 | 99.0                         | AAVEEGIVTGGGAALVQAR     | ITRAQ4plex@N-term                                |               |                    | -0.02 | 1912.03 | 638.35   | 1912.05  | 638.36    | 3       | 7.2      |
| 65.0  | A0QSS4 | MSMEG_1583 | 99.0                         | AAVEEGIVTGGGAALVQAR     | ITRAQ4plex@N-term                                |               |                    | -0.03 | 1912.02 | 638.35   | 1912.05  | 638.36    | 3       | 17.2     |
| 65.0  | A0QSS4 | MSMEG_1583 | 99.0                         | AAVEEGIVTGGGAALVQAR     | ITRAQ4plex@N-term                                |               |                    | -0.02 | 1912.03 | 638.35   | 1912.05  | 638.36    | 3       | 28.3     |
| 65.0  | A0QSS4 | MSMEG_1583 | 99.0                         | AAVEEGIVTGGGAALVQAR     | ITRAQ4plex@N-term                                |               |                    | -0.02 | 1912.03 | 638.35   | 1912.05  | 638.36    | 3       | 12.0     |
| 65.0  | A0QSS4 | MSMEG_1583 | 99.0                         | AAVEEGIVTGGGAALVQAR     | ITRAQ4plex@N-term                                |               |                    | -0.02 | 1912.03 | 638.35   | 1912.05  | 638.36    | 3       | 10.9     |
| 65.0  | A0QSS4 | MSMEG_1583 | 99.0                         | AAVEEGIVTGGGAALVQAR     | ITRAQ4plex@N-term                                |               |                    | -0.03 | 1912.02 | 638.35   | 1912.05  | 638.36    | 3       | 10.9     |
| 65.0  | A0QSS4 | MSMEG_1583 | 99.0                         | AAVEEGIVTGGGAALVQAR     | ITRAQ4plex@N-term                                |               |                    | -0.02 | 1912.03 | 638.35   | 1912.05  | 638.36    | 3       | 6.3      |
| 65.0  | A0QSS4 | MSMEG_1583 | 99.0                         | AAVEEGIVTGGGAALVQAR     | ITRAQ4plex@N-term                                |               |                    | -0.03 | 1912.02 | 638.35   | 1912.05  | 638.36    | 3       | 13.0     |
| 65.0  | A0QSS4 | MSMEG_1583 | 99.0                         | AAVEEGIVTGGGAALVQAR     | ITRAQ4plex@N-term                                |               |                    | -0.02 | 1912.03 | 638.35   | 1912.05  | 638.36    | 3       | 5.4      |
| 65.0  | A0QSS4 | MSMEG_1583 | 99.0                         | AAVEEGIVTGGGAALVQAR     | ITRAQ4plex@N-term                                |               |                    | -0.02 | 1912.03 | 638.35   | 1912.05  | 638.36    | 3       | 4.4      |
| 65.0  | A0QSS4 | MSMEG_1583 | 99.0                         | AAVEEGIVTGGGAALVQAR     | ITRAQ4plex@N-term                                |               |                    | -0.03 | 1912.02 | 638.35   | 1912.05  | 638.36    | 3       | 6.5      |
| 65.0  | A0QSS4 | MSMEG_1583 | 99.0                         | AAVEEGIVTGGGAALVQAR     | ITRAQ4plex@N-term                                |               |                    | 0.04  | 1912.09 | 638.37   | 1912.05  | 638.36    | 3       | 21.2     |
| 65.0  | A0QSS4 | MSMEG_1583 | 99.0                         | AAVEEGIVTGGGAALVQAR     | ITRAQ4plex@N-term                                |               |                    | 0.03  | 1912.08 | 638.37   | 1912.05  | 638.36    | 3       | 784.0    |
| 65.0  | A0QSS4 | MSMEG_1583 | 99.0                         | AAVEEGIVTGGGAALVQAR     | ITRAQ4plex@N-term                                |               |                    | -0.01 | 1912.04 | 638.35   | 1912.05  | 638.36    | 3       | 223.8    |
| 65.0  | A0QSS4 | MSMEG_1583 | 99.0                         | AAVEEGIVTGGGAALVQAR     | ITRAQ4plex@N-term                                |               |                    | -0.01 | 1912.04 | 638.35   | 1912.05  | 638.36    | 3       | 95.8     |
| 65.0  | A0QSS4 | MSMEG_1583 | 99.0                         | AAVEEGIVTGGGAALVQAR     | ITRAQ4plex@N-term                                |               |                    | -0.04 | 1912.01 | 638.34   | 1912.05  | 638.36    | 3       | 505.8    |
| 65.0  | A0QSS4 | MSMEG_1583 | 99.0                         | AAVEEGIVTGGGAALVQAR     | ITRAQ4plex@N-term                                |               |                    | -0.01 | 1912.04 | 638.35   | 1912.05  | 638.36    | 3       | 167.2    |
| 65.0  | A0QSS4 | MSMEG_1583 | 99.0                         | AAVEEGIVTGGGAALVQAR     | ITRAQ4plex@N-term; Dimethyl(R)@19                |               |                    | -0.01 | 1940.07 | 647.70   | 1940.08  | 647.70    | 3       | 208.9    |
| 65.0  | A0QSS4 | MSMEG_1583 | 99.0                         | AAVEEGIVTGGGAALVQAR     | ITRAQ4plex@N-term                                |               |                    | -0.05 | 1912.00 | 638.34   | 1912.05  | 638.36    | 3       | 187.4    |
| 65.0  | A0QSS4 | MSMEG_1583 | 99.0                         | AAVEEGIVTGGGAALVQAR     | ITRAQ4plex@N-term; Gln->Arg@17                   |               |                    | -0.03 | 1940.06 | 647.69   | 1940.09  | 647.70    | 3       | 114.4    |
| 65.0  | A0QSS4 | MSMEG_1583 | 99.0                         | AAVEEGIVTGGGAALVQAR     | ITRAQ4plex@N-term                                |               |                    | -0.01 | 1912.04 | 638.35   | 1912.05  | 638.36    | 3       | 120.2    |
| 65.0  | A0QSS4 | MSMEG_1583 | 99.0                         | AAVEEGIVTGGGAALVQAR     | ITRAQ4plex@N-term                                |               |                    | -0.01 | 1912.04 | 638.35   | 1912.05  | 638.36    | 3       | 64.2     |
| 65.0  | A0QSS4 | MSMEG_1583 | 99.0                         | AAVEEGIVTGGGAALVQAR     | ITRAQ4plex@N-term                                |               |                    | -0.04 | 1912.01 | 638.34   | 1912.05  | 638.36    | 3       | 94.8     |
| 65.0  | A0QSS4 | MSMEG_1583 | 99.0                         | AAVEEGIVTGGGAALVQAR     | ITRAQ4plex@N-term                                |               |                    | -0.01 | 1912.04 | 638.36   | 1912.05  | 638.36    | 3       | 166.9    |
| 65.0  | A0QSS4 | MSMEG_1583 | 99.0                         | AAVEEGIVTGGGAALVQAR     | ITRAQ4plex@N-term                                |               |                    | -0.03 | 1912.03 | 638.35   | 1912.05  | 638.36    | 3       | 411.8    |
| 65.0  | A0QSS4 | MSMEG_1583 | 99.0                         | AAVEEGIVTGGGAALVQAR     | ITRAQ4plex@N-term                                |               |                    | -0.02 | 1912.03 | 638.35   | 1912.05  | 638.36    | 3       | 31.0     |
| 65.0  | A0QSS4 | MSMEG_1583 | 99.0                         | AAVEEGIVTGGGAALVQAR     | ITRAQ4plex@N-term                                |               |                    | -0.02 | 1912.03 | 638.35   | 1912.05  | 638.36    | 3       | 16.3     |
| 65.0  | A0QSS4 | MSMEG_1583 | 99.0                         | AAVEEGIVTGGGAALVQAR     | ITRAQ4plex@N-term                                |               |                    | -0.02 | 1912.03 | 638.35   | 1912.05  | 638.36    | 3       | 17.4     |
| 65.0  | A0QSS4 | MSMEG_1583 | 99.0                         | AAVEEGIVTGGGAALVQAR     | ITRAQ4plex@N-term                                |               |                    | -0.02 | 1912.03 | 638.35   | 1912.05  | 638.36    | 3       | 37.5     |
| 65.0  | A0QSS4 | MSMEG_1583 | 99.0                         | AAVEEGIVTGGGAALVQAR     | ITRAQ4plex@N-term                                |               |                    | 0.02  | 1912.07 | 957.04   | 1912.05  | 957.03    | 2       | 924.5    |
| 65.0  | A0QSS4 | MSMEG_1583 | 99.0                         | AAVEEGIVTGGGAALVQAR     | ITRAQ4plex@N-term; Ile->Gln@7                    |               |                    | 0.01  | 1927.03 | 643.35   | 1927.02  | 643.35    | 3       | 33.8     |
| 65.0  | A0QSS4 | MSMEG_1583 | 99.0                         | AAVEEGIVTGGGAALVQAR     | ITRAQ4plex@N-term; Val->Asn@8                    |               |                    | 0.03  | 1927.05 | 643.36   | 1927.02  | 643.35    | 3       | 10.5     |
| 65.0  | A0QSS4 | MSMEG_1583 | 99.0                         | AAVEEGIVTGGGAALVQAR     | ITRAQ4plex@N-term; Gly->Ser@10                   |               |                    | -0.05 | 1942.01 | 648.35   | 1942.06  | 648.36    | 3       | 17.4     |
| 65.0  | A0QSS4 | MSMEG_1583 | 99.0                         | AAVEEGIVTGGGAALVQAR     | ITRAQ4plex@N-term                                |               |                    | 0.03  | 1912.08 | 638.37   | 1912.05  | 638.36    | 3       |          |

Supplement Table 1A

| Index | % Cov  | Uniprot ID | Gene locus<br>(M. smegmatis) | Conf                     | Peptide Sequence                                                   | Modifications | Cleavages | ΔMass  | Prec MW | Prec m/z | Calc. MW | Calc. m/z | Theor z | Area 115 |
|-------|--------|------------|------------------------------|--------------------------|--------------------------------------------------------------------|---------------|-----------|--------|---------|----------|----------|-----------|---------|----------|
| 65.0  | A0QSS4 | MSMEG_1583 | 99.0                         | AAVEEGIVTGGGAALVQAR      | ITRAQ4plex@N-term                                                  | -0.02         | 1912.03   | 638.35 | 1912.05 | 638.36   | 3        | 8.7       |         |          |
| 65.0  | A0QSS4 | MSMEG_1583 | 99.0                         | AAVEEGIVTGGGAALVQAR      | ITRAQ4plex@N-term                                                  | -0.03         | 1912.02   | 638.35 | 1912.05 | 638.36   | 3        | 19.6      |         |          |
| 65.0  | A0QSS4 | MSMEG_1583 | 99.0                         | AAVEEGIVTGGGAALVQAR      | ITRAQ4plex@N-term                                                  | -0.04         | 1912.01   | 638.35 | 1912.05 | 638.36   | 3        |           |         |          |
| 65.0  | A0QSS4 | MSMEG_1583 | 99.0                         | AAVEEGIVTGGGAALVQAR      | ITRAQ4plex@N-term                                                  | 0.04          | 1912.09   | 638.37 | 1912.05 | 638.36   | 3        | 1.190.0   |         |          |
| 65.0  | A0QSS4 | MSMEG_1583 | 99.0                         | AFLDDLAIVTGGQVNPDPVGLLLR | ITRAQ4plex@N-term                                                  | 0.00          | 2638.48   | 880.50 | 2638.48 | 880.50   | 3        | 154.4     |         |          |
| 65.0  | A0QSS4 | MSMEG_1583 | 99.0                         | AFLDDLAIVTGGQVNPDPVGLLLR | ITRAQ4plex@N-term; Deamidated(Q)@13; Dimethyl(R)@24                | 0.03          | 2667.53   | 890.18 | 2667.50 | 890.17   | 3        | 300.7     |         |          |
| 65.0  | A0QSS4 | MSMEG_1583 | 99.0                         | AFLDDLAIVTGGQVNPDPVGLLLR | ITRAQ4plex@N-term; Deamidated(Q)@13; Dimethyl(R)@24                | 0.00          | 2667.49   | 890.17 | 2667.50 | 890.17   | 3        | 506.5     |         |          |
| 65.0  | A0QSS4 | MSMEG_1583 | 99.0                         | AFLDDLAIVTGGQVNPDPVGLLLR | ITRAQ4plex@N-term; Dimethyl(R)@24                                  | -0.01         | 2666.50   | 889.84 | 2666.51 | 889.84   | 3        | 14.1      |         |          |
| 65.0  | A0QSS4 | MSMEG_1583 | 99.0                         | AFLDDLAIVTGGQVNPDPVGLLLR | ITRAQ4plex@N-term; Dimethyl(R)@24                                  | 0.01          | 2666.53   | 889.85 | 2666.51 | 889.84   | 3        | 15.8      |         |          |
| 65.0  | A0QSS4 | MSMEG_1583 | 99.0                         | AFLDDLAIVTGGQVNPDPVGLLLR | ITRAQ4plex@N-term; Methyl(L)@21; Methyl(L)@23                      | 0.00          | 2666.51   | 889.84 | 2666.51 | 889.84   | 3        | 15.8      |         |          |
| 65.0  | A0QSS4 | MSMEG_1583 | 99.0                         | AFLDDLAIVTGGQVNPDPVGLLLR | ITRAQ4plex@N-term; Dimethyl(R)@24                                  | 0.06          | 2666.57   | 889.87 | 2666.51 | 889.84   | 3        | 68.7      |         |          |
| 65.0  | A0QSS4 | MSMEG_1583 | 99.0                         | AFLDDLAIVTGGQVNPDPVGLLLR | ITRAQ4plex@N-term                                                  | 0.07          | 2638.55   | 660.65 | 2638.48 | 660.63   | 4        | 105.1     |         |          |
| 65.0  | A0QSS4 | MSMEG_1583 | 99.0                         | AIAQVATVSSR              | ITRAQ4plex@N-term                                                  | 0.01          | 1245.73   | 623.87 | 1245.72 | 623.87   | 2        | 9.905.4   |         |          |
| 65.0  | A0QSS4 | MSMEG_1583 | 99.0                         | AIAQVATVSSR              | ITRAQ4plex@N-term; Ser->Asp@10                                     | 0.07          | 1273.78   | 637.90 | 1273.71 | 637.86   | 2        | 3.696.1   |         |          |
| 65.0  | A0QSS4 | MSMEG_1583 | 99.0                         | DEQVGEVLGEAMTK           | ITRAQ4plex@N-term; Oxidation(M)@12; ITRAQ4plex(T)@13; Lys->Gln@14  | 0.05          | 1808.92   | 603.98 | 1808.87 | 603.96   | 3        | 201.9     |         |          |
| 65.0  | A0QSS4 | MSMEG_1583 | 99.0                         | DEQVGEVLGEAMTK           | ITRAQ4plex@N-term; ITRAQ4plex(T)@13; Lys->Gln@14                   | -0.01         | 1792.86   | 598.63 | 1792.88 | 598.63   | 3        | 491.9     |         |          |
| 65.0  | A0QSS4 | MSMEG_1583 | 99.0                         | DSTVVDGGGTAEAIADR        | ITRAQ4plex@N-term                                                  | 0.06          | 1890.01   | 631.01 | 1889.95 | 630.99   | 3        | 5.4       |         |          |
| 65.0  | A0QSS4 | MSMEG_1583 | 99.0                         | DSTVVDGGGTAEAIADR        | ITRAQ4plex@N-term                                                  | -0.02         | 1889.92   | 630.98 | 1889.95 | 630.99   | 3        | 5.2       |         |          |
| 65.0  | A0QSS4 | MSMEG_1583 | 99.0                         | DSTVVDGGGTAEAIADR        | ITRAQ4plex@N-term                                                  | -0.02         | 1889.93   | 630.98 | 1889.95 | 630.99   | 3        | 4.4       |         |          |
| 65.0  | A0QSS4 | MSMEG_1583 | 99.0                         | DSTVVDGGGTAEAIADR        | ITRAQ4plex@N-term                                                  | 0.03          | 1889.98   | 630.99 | 1889.95 | 630.99   | 3        | 330.8     |         |          |
| 65.0  | A0QSS4 | MSMEG_1583 | 99.0                         | DSTVVDGGGTAEAIADR        | ITRAQ4plex@N-term; Dimethyl(R)@18                                  | -0.01         | 1917.97   | 959.99 | 1917.98 | 960.00   | 2        | 176.3     |         |          |
| 65.0  | A0QSS4 | MSMEG_1583 | 99.0                         | DSTVVDGGGTAEAIADR        | ITRAQ4plex@N-term                                                  | 0.02          | 1889.97   | 631.00 | 1889.95 | 630.99   | 3        | 9.6       |         |          |
| 65.0  | A0QSS4 | MSMEG_1583 | 99.0                         | DSTVVDGGGTAEAIADR        | ITRAQ4plex@N-term                                                  | 0.01          | 1889.96   | 630.99 | 1889.95 | 630.99   | 3        |           |         |          |
| 65.0  | A0QSS4 | MSMEG_1583 | 99.0                         | DSTVVDGGGTAEAIADR        | ITRAQ4plex@N-term                                                  | 0.01          | 1889.95   | 630.99 | 1889.95 | 630.99   | 3        |           |         |          |
| 65.0  | A0QSS4 | MSMEG_1583 | 99.0                         | DSTVVDGGGTAEAIADR        | ITRAQ4plex@N-term                                                  | -0.03         | 1889.91   | 630.98 | 1889.95 | 630.99   | 3        |           |         |          |
| 65.0  | A0QSS4 | MSMEG_1583 | 99.0                         | DSTVVDGGGTAEAIADR        | ITRAQ4plex@N-term; Dimethyl(R)@18                                  | -0.02         | 1917.96   | 640.33 | 1917.98 | 640.33   | 3        | 15.9      |         |          |
| 65.0  | A0QSS4 | MSMEG_1583 | 99.0                         | DSTVVDGGGTAEAIADR        | ITRAQ4plex@N-term                                                  | -0.02         | 1889.92   | 630.98 | 1889.95 | 630.99   | 3        | 13.0      |         |          |
| 65.0  | A0QSS4 | MSMEG_1583 | 99.0                         | DSTVVDGGGTAEAIADR        | ITRAQ4plex@N-term                                                  | -0.02         | 1889.92   | 630.98 | 1889.95 | 630.99   | 3        |           |         |          |
| 65.0  | A0QSS4 | MSMEG_1583 | 99.0                         | DSTVVDGGGTAEAIADR        | ITRAQ4plex@N-term                                                  | 0.01          | 1889.96   | 630.99 | 1889.95 | 630.99   | 3        | 24.6      |         |          |
| 65.0  | A0QSS4 | MSMEG_1583 | 99.0                         | DSTVVDGGGTAEAIADR        | ITRAQ4plex@N-term                                                  | 0.01          | 1889.96   | 630.99 | 1889.95 | 630.99   | 3        | 7.6       |         |          |
| 65.0  | A0QSS4 | MSMEG_1583 | 99.0                         | DSTVVDGGGTAEAIADR        | ITRAQ4plex@N-term                                                  | 0.01          | 1889.96   | 630.99 | 1889.95 | 630.99   | 3        |           |         |          |
| 65.0  | A0QSS4 | MSMEG_1583 | 99.0                         | DSTVVDGGGTAEAIADR        | ITRAQ4plex@N-term                                                  | -0.02         | 1889.93   | 630.98 | 1889.95 | 630.99   | 3        |           |         |          |
| 65.0  | A0QSS4 | MSMEG_1583 | 99.0                         | DSTVVDGGGTAEAIADR        | ITRAQ4plex@N-term                                                  | -0.04         | 1889.91   | 630.98 | 1889.95 | 630.99   | 3        |           |         |          |
| 65.0  | A0QSS4 | MSMEG_1583 | 99.0                         | DSTVVDGGGTAEAIADR        | ITRAQ4plex@N-term                                                  | 0.05          | 1889.99   | 631.00 | 1889.95 | 630.99   | 3        | 10.9      |         |          |
| 65.0  | A0QSS4 | MSMEG_1583 | 99.0                         | DSTVVDGGGTAEAIADR        | ITRAQ4plex@N-term                                                  | -0.03         | 1889.92   | 630.98 | 1889.95 | 630.99   | 3        | 9.6       |         |          |
| 65.0  | A0QSS4 | MSMEG_1583 | 99.0                         | EAVEDAVAAAK              | ITRAQ4plex@N-term; Lys->Gln@11                                     | 0.05          | 1216.66   | 609.34 | 1216.61 | 609.31   | 2        | 1.646.5   |         |          |
| 65.0  | A0QSS4 | MSMEG_1583 | 99.0                         | EAVEDAVAAAK              | ITRAQ4plex@N-term; Lys->Arg@11                                     | 0.05          | 1244.69   | 623.35 | 1244.65 | 623.33   | 2        | 378.9     |         |          |
| 65.0  | A0QSS4 | MSMEG_1583 | 99.0                         | EVGLEVLGSAR              | ITRAQ4plex@N-term                                                  | 0.00          | 1272.71   | 637.36 | 1272.72 | 637.37   | 2        | 2.433.9   |         |          |
| 65.0  | A0QSS4 | MSMEG_1583 | 99.0                         | EVGLEVLGSAR              | ITRAQ4plex@N-term                                                  | 0.02          | 1272.73   | 637.37 | 1272.72 | 637.37   | 2        | 628.5     |         |          |
| 65.0  | A0QSS4 | MSMEG_1583 | 99.0                         | EVGLEVLGSAR              | ITRAQ4plex@N-term; Ser->Asp@9                                      | 0.03          | 1300.74   | 651.38 | 1300.71 | 651.36   | 2        | 453.2     |         |          |
| 65.0  | A0QSS4 | MSMEG_1583 | 99.0                         | GQGFNAATLEFGDLVSAGVVDPAK | ITRAQ4plex@N-term; Lys->Gln@24                                     | 0.01          | 2506.25   | 836.42 | 2506.25 | 836.42   | 3        | 27.1      |         |          |
| 65.0  | A0QSS4 | MSMEG_1583 | 99.0                         | GQGFNAATLEFGDLVSAGVVDPAK | ITRAQ4plex@N-term; Methyl(D)@13; Lys->Gln@24                       | 0.01          | 2520.27   | 841.10 | 2520.26 | 841.09   | 3        | 18.5      |         |          |
| 65.0  | A0QSS4 | MSMEG_1583 | 99.0                         | GQGFNAATLEFGDLVSAGVVDPAK | ITRAQ4plex@N-term; Lys->Gln@24                                     | 0.03          | 2506.28   | 836.43 | 2506.25 | 836.42   | 3        | 20.7      |         |          |
| 65.0  | A0QSS4 | MSMEG_1583 | 99.0                         | GQGFNAATLEFGDLVSAGVVDPAK | ITRAQ4plex@N-term; Lys->Arg@24                                     | -0.01         | 2534.28   | 845.77 | 2534.29 | 845.77   | 3        |           |         |          |
| 65.0  | A0QSS4 | MSMEG_1583 | 99.0                         | GQGFNAATLEFGDLVSAGVVDPAK | ITRAQ4plex@N-term; Lys->Gln@24                                     | 0.01          | 2506.25   | 836.43 | 2506.25 | 836.42   | 3        |           |         |          |
| 65.0  | A0QSS4 | MSMEG_1583 | 99.0                         | GQGFNAATLEFGDLVSAGVVDPAK | ITRAQ4plex@N-term; Asp->Asn@13; Lys->Gln@24                        | -0.01         | 2505.25   | 836.09 | 2505.26 | 836.09   | 3        | 8.7       |         |          |
| 65.0  | A0QSS4 | MSMEG_1583 | 99.0                         | ISSLPDLLPLEK             | ITRAQ4plex@N-term; Lys->Gln@13                                     | 0.02          | 1580.94   | 791.48 | 1580.91 | 791.46   | 2        | 415.3     |         |          |
| 65.0  | A0QSS4 | MSMEG_1583 | 99.0                         | NVAAGANPIALGSGISK        | ITRAQ4plex@N-term; Lys->Gln@17                                     | 0.04          | 1682.95   | 842.48 | 1682.91 | 842.46   | 2        | 1.157.9   |         |          |
| 65.0  | A0QSS4 | MSMEG_1583 | 99.0                         | NVAAGANPIALGSGISK        | ITRAQ4plex@N-term; Lys->Arg@17                                     | 0.05          | 1711.00   | 856.51 | 1710.95 | 856.48   | 2        | 302.4     |         |          |
| 65.0  | A0QSS4 | MSMEG_1583 | 99.0                         | NVAAGANPIALGSGISK        | ITRAQ4plex@N-term; iTRAQ4plex(S)@16; Lys->Gln@17                   | 0.03          | 1827.04   | 610.02 | 1827.01 | 610.01   | 3        | 645.7     |         |          |
| 65.0  | A0QSS4 | MSMEG_1583 | 99.0                         | NVAAGANPIALGSGISK        | ITRAQ4plex@N-term; iTRAQ4plex(S)@16; Lys->Gln@17                   | 0.04          | 1827.05   | 610.02 | 1827.01 | 610.01   | 3        | 395.6     |         |          |
| 65.0  | A0QSS4 | MSMEG_1583 | 99.0                         | NVAAGANPIALGSGISK        | ITRAQ4plex@N-term; Dehydrated(S)@13; iTRAQ4plex(S)@16; Lys->Gln@17 | 0.05          | 1809.05   | 604.02 | 1809.00 | 604.01   | 3        | 131.0     |         |          |
| 65.0  | A0QSS4 | MSMEG_1583 | 99.0                         | NVAAGANPIALGSGISK        | ITRAQ4plex@N-term; iTRAQ4plex(S)@16; Lys->Arg@17                   | 0.01          | 1855.06   | 619.36 | 1855.05 | 619.36   | 3        | 462.6     |         |          |
| 65.0  | A0QSS4 | MSMEG_1583 | 99.0                         | QIEFNETAR                | ITRAQ4plex@N-term                                                  | -0.01         | 1250.62   | 626.32 | 1250.64 | 626.33   | 2        | 16.221.1  |         |          |
| 65.0  | A0QSS4 | MSMEG_1583 | 99.0                         | QIEFNETAR                | ITRAQ4plex@N-term                                                  | 0.02          | 1250.66   | 626.34 | 1250.64 | 626.33   | 2        | 6.002.4   |         |          |
| 65.0  | A0QSS4 | MSMEG_1583 | 99.0                         | QIEFNETAR                | ITRAQ4plex@N-term; Deamidated(Q)@11; Deamidated(N)@5               | 0.05          | 1252.66   | 627.34 | 1252.61 | 627.31   | 2        | 4.913.0   |         |          |
| 65.0  | A0QSS4 | MSMEG_1583 | 99.0                         | SAVLNAAASVAR             | ITRAQ4plex@N-term                                                  | 0.01          | 1201.70   | 601.86 | 1201.69 | 601.85   | 2        | 6.348.8   |         |          |
| 65.0  | A0QSS4 | MSMEG_1583 | 99.0                         | SAVLNAAASVAR             | ITRAQ4plex@N-term                                                  | 0.01          | 1201.70   | 601.86 | 1201.69 | 601.85   | 2        | 1.114.9   |         |          |
| 65.0  | A0QSS4 | MSMEG_1583 | 99.0                         | SAVLNAAASVAR             | ITRAQ4plex@N-term                                                  | 0.01          | 1201.70   | 601.86 | 1201.69 | 601.85   | 2        | 5.564.1   |         |          |
| 65.0  | A0QSS4 | MSMEG_1583 | 99.0                         | SAVLNAAASVAR             | ITRAQ4plex@N-term; Ala->Val@10                                     | 0.02          | 1229.74   | 615.88 | 1229.72 | 615.87   | 2        | 4.829.5   |         |          |
| 65.0  | A0QSS4 | MSMEG_1583 | 99.0                         | SEIETDSDWDR              | ITRAQ4plex@N-term                                                  | 0.01          | 1596.71   | 799.36 | 1596.70 | 799.36   | 2        | 1.991.8   |         |          |

Supplement Table 1A

| Index | % Cov  | Uniprot ID | Gene locus<br>(M. smegmatis) | Conf                        | Peptide Sequence                                                  | Modifications                                    | Cleavages          | ΔMass | Prec MW | Prec m/z | Calc. MW | Calc. m/z | Theor z | Area 115 |      |
|-------|--------|------------|------------------------------|-----------------------------|-------------------------------------------------------------------|--------------------------------------------------|--------------------|-------|---------|----------|----------|-----------|---------|----------|------|
| 65.0  | A0QSS4 | MSMEG_1583 | 99.0                         | SEIETDSDWDR                 | ITRAQ4plex@N-term; Dioxidation(W)@10                              |                                                  |                    | 0.02  | 1628.71 | 815.36   | 1628.69  | 815.35    | 2       | 752.7    |      |
| 65.0  | A0QSS4 | MSMEG_1583 | 99.0                         | SEIETDSDWDR                 | ITRAQ4plex@N-term; Dimethyl(R)@12                                 |                                                  |                    | 0.01  | 1624.75 | 813.38   | 1624.73  | 813.37    | 2       | 643.1    |      |
| 65.0  | A0QSS4 | MSMEG_1583 | 99.0                         | SEIETDSDWDREK               | ITRAQ4plex@N-term; Lys->Gln@14                                    |                                                  | missed R-E@12      | 0.10  | 1853.90 | 618.98   | 1853.80  | 618.94    | 3       | 758.2    |      |
| 65.0  | A0QSS4 | MSMEG_1583 | 99.0                         | SFGGPQVTNDGVTIAR            | ITRAQ4plex@N-term; Deamidated(N)@9                                |                                                  |                    | 0.01  | 1762.91 | 882.46   | 1762.90  | 882.46    | 2       | 1,136.3  |      |
| 65.0  | A0QSS4 | MSMEG_1583 | 99.0                         | SFGGPQVTNDGVTIAR            | ITRAQ4plex@N-term; Ala->Val@15                                    |                                                  |                    | -0.04 | 1789.90 | 597.64   | 1789.94  | 597.66    | 3       | 178.1    |      |
| 65.0  | A0QSS4 | MSMEG_1583 | 99.0                         | SFGGPQVTNDGVTIAR            | ITRAQ4plex@N-term                                                 |                                                  |                    | 0.01  | 1761.92 | 588.31   | 1761.91  | 588.31    | 3       | 654.0    |      |
| 65.0  | A0QSS4 | MSMEG_1583 | 99.0                         | TNDVAGDGTTTATVLAQALVR       | ITRAQ4plex@N-term                                                 |                                                  |                    | -0.01 | 2217.16 | 740.06   | 2217.17  | 740.06    | 3       | 69.6     |      |
| 65.0  | A0QSS4 | MSMEG_1583 | 99.0                         | TNDVAGDGTTTATVLAQALVR       | ITRAQ4plex@N-term; Dimethyl(R)@21                                 |                                                  |                    | 0.01  | 2245.21 | 749.41   | 2245.20  | 749.41    | 3       | 25.4     |      |
| 65.0  | A0QSS4 | MSMEG_1583 | 99.0                         | TNDVAGDGTTTATVLAQALVR       | ITRAQ4plex@N-term; Thr->Asn@11                                    |                                                  |                    | -0.02 | 2230.15 | 744.39   | 2230.17  | 744.40    | 3       | 14.7     |      |
| 65.0  | A0QSS4 | MSMEG_1583 | 99.0                         | TNDVAGDGTTTATVLAQALVR       | ITRAQ4plex@N-term; Dehydrated(T)@11                               |                                                  |                    | -0.06 | 2199.11 | 734.04   | 2199.16  | 734.06    | 3       | 17.2     |      |
| 65.0  | A0QSS4 | MSMEG_1583 | 99.0                         | TNDVAGDGTTTATVLAQALVR       | ITRAQ4plex@N-term                                                 |                                                  |                    | -0.03 | 2217.14 | 740.05   | 2217.17  | 740.06    | 3       | 15.2     |      |
| 65.0  | A0QSS4 | MSMEG_1583 | 99.0                         | TNDVAGDGTTTATVLAQALVR       | ITRAQ4plex@N-term                                                 |                                                  |                    | -0.01 | 2217.16 | 740.06   | 2217.17  | 740.06    | 3       | 20.7     |      |
| 65.0  | A0QSS4 | MSMEG_1583 | 99.0                         | TNDVAGDGTTTATVLAQALVR       | ITRAQ4plex@N-term; Dimethyl(R)@21                                 |                                                  |                    | -0.04 | 2245.16 | 749.39   | 2245.20  | 749.41    | 3       | 11.3     |      |
| 65.0  | A0QSS4 | MSMEG_1583 | 99.0                         | TNDVAGDGTTTATVLAQALVR       | ITRAQ4plex@N-term                                                 |                                                  |                    | -0.02 | 2217.15 | 740.06   | 2217.17  | 740.06    | 3       |          |      |
| 65.0  | A0QSS4 | MSMEG_1583 | 99.0                         | TNDVAGDGTTTATVLAQALVR       | ITRAQ4plex@N-term                                                 |                                                  |                    | -0.01 | 2217.16 | 740.06   | 2217.17  | 740.06    | 3       | 15.2     |      |
| 65.0  | A0QSS4 | MSMEG_1583 | 99.0                         | TNDVAGDGTTTATVLAQALVR       | ITRAQ4plex@N-term                                                 |                                                  |                    | 0.00  | 2217.17 | 740.06   | 2217.17  | 740.06    | 3       | 8.7      |      |
| 65.0  | A0QSS4 | MSMEG_1583 | 99.0                         | TNDVAGDGTTTATVLAQALVR       | ITRAQ4plex@N-term                                                 |                                                  |                    | 0.00  | 2217.17 | 740.06   | 2217.17  | 740.06    | 3       | 13.0     |      |
| 65.0  | A0QSS4 | MSMEG_1583 | 99.0                         | TNDVAGDGTTTATVLAQALVR       | ITRAQ4plex@N-term                                                 |                                                  |                    | -0.01 | 2217.16 | 740.06   | 2217.17  | 740.06    | 3       | 8.7      |      |
| 65.0  | A0QSS4 | MSMEG_1583 | 99.0                         | TNDVAGDGTTTATVLAQALVR       | ITRAQ4plex@N-term; Dimethyl(R)@21                                 |                                                  |                    | -0.02 | 2245.18 | 749.40   | 2245.20  | 749.41    | 3       | 137.0    |      |
| 65.0  | A0QSS4 | MSMEG_1583 | 99.0                         | VGAATETDLK                  | ITRAQ4plex@N-term; Lys->Arg@10                                    |                                                  |                    | 0.04  | 1175.67 | 588.84   | 1175.63  | 588.82    | 2       | 1,925.6  |      |
| 65.0  | A0QSS4 | MSMEG_1583 | 98.0                         | IEFNETAR                    | ITRAQ4plex@N-term                                                 |                                                  | cleaved Q-I@N-term | 0.01  | 1122.59 | 562.30   | 1122.58  | 562.30    | 2       | 6,889.9  |      |
| 65.0  | A0QSS4 | MSMEG_1583 | 98.0                         | LAGGVAIVK                   | ITRAQ4plex@N-term; Lys->Gln@9                                     |                                                  |                    | 0.02  | 970.61  | 486.31   | 970.59   | 486.30    | 2       | 6,055.9  |      |
| 65.0  | A0QSS4 | MSMEG_1583 | 98.0                         | DSTVIVDGGGTAEAIADR          | ITRAQ4plex@N-term; Ile->Asn@5; Dimethyl(R)@18                     |                                                  |                    | 0.04  | 1918.97 | 640.67   | 1918.94  | 640.65    | 3       | 74.4     |      |
| 65.0  | A0QSS4 | MSMEG_1583 | 98.0                         | VGAATETDLK                  | ITRAQ4plex@N-term; Lys->Gln@10                                    |                                                  |                    | 0.05  | 1147.64 | 574.83   | 1147.58  | 574.80    | 2       | 54.5     |      |
| 65.0  | A0QSS4 | MSMEG_1583 | 97.0                         | LAGGVAIVK                   | ITRAQ4plex@N-term; Lys->Gln@9                                     |                                                  |                    | 0.04  | 970.63  | 486.32   | 970.59   | 486.30    | 2       | 1,332.1  |      |
| 65.0  | A0QSS4 | MSMEG_1583 | 97.0                         | VGAATETDLK                  | ITRAQ4plex@N-term; Lys->Gln@10                                    |                                                  |                    | 0.04  | 1147.62 | 574.82   | 1147.58  | 574.80    | 2       | 122.7    |      |
| 65.0  | A0QSS4 | MSMEG_1583 | 96.0                         | AADAVSEALLASATPVDDK         | ITRAQ4plex@N-term; ITRAQ4plex(T)@14; Lys->Arg@19                  |                                                  |                    | -0.04 | 2159.09 | 720.71   | 2159.13  | 720.72    | 3       | 395.1    |      |
| 65.0  | A0QSS4 | MSMEG_1583 | 96.0                         | DSTVIVDGGGTAEAIADR          | ITRAQ4plex@N-term; Dimethyl(R)@18                                 |                                                  |                    | 0.04  | 1918.02 | 640.35   | 1917.98  | 640.33    | 3       |          |      |
| 65.0  | A0QSS4 | MSMEG_1583 | 96.0                         | DSTVIVDGGGTAEAIADR          | ITRAQ4plex@N-term                                                 |                                                  |                    | -0.03 | 1889.91 | 630.98   | 1889.95  | 630.99    | 3       | 8.7      |      |
| 65.0  | A0QSS4 | MSMEG_1583 | 96.0                         | EAVEDAVAAAK                 | ITRAQ4plex@N-term; Lys->Gln@11                                    |                                                  |                    | 0.05  | 1216.66 | 609.34   | 1216.61  | 609.31    | 2       | 258.5    |      |
| 65.0  | A0QSS4 | MSMEG_1583 | 96.0                         | NVAAGANPIALGSGISK           | ITRAQ4plex@N-term; Deamidated(N)@7; ITRAQ4plex(S)@16; Lys->Glu@17 |                                                  |                    | 0.07  | 1829.05 | 610.69   | 1828.98  | 610.67    | 3       | 1,587.7  |      |
| 65.0  | A0QSS4 | MSMEG_1583 | 95.0                         | DSTVIVDGGGTAEAIADR          | ITRAQ4plex@N-term                                                 |                                                  |                    | 0.02  | 1889.96 | 630.99   | 1889.95  | 630.99    | 3       | 45.1     |      |
| 65.0  | A0QSS4 | MSMEG_1583 | 95.0                         | DSTVIVDGGGTAEAIADR          | ITRAQ4plex@N-term                                                 |                                                  |                    | -0.04 | 1889.91 | 630.98   | 1889.95  | 630.99    | 3       | 12.8     |      |
| 65.0  | A0QSS4 | MSMEG_1583 | 93.0                         | APFFGDR                     | ITRAQ4plex@N-term                                                 |                                                  |                    | 0.01  | 952.49  | 477.25   | 952.49   | 477.25    | 2       | 1,416.7  |      |
| 65.0  | A0QSS4 | MSMEG_1583 | 93.0                         | AIAQVATVSSR                 | ITRAQ4plex@N-term; Dehydrated(T)@7                                |                                                  |                    | 0.00  | 1227.70 | 410.24   | 1227.71  | 410.24    | 3       | 16.3     |      |
| 65.0  | A0QSS4 | MSMEG_1583 | 91.0                         | DSTVIVDGGGTAEAIADR          | ITRAQ4plex@N-term; Dimethyl(R)@18                                 |                                                  |                    | 0.01  | 1917.99 | 640.34   | 1917.98  | 640.33    | 3       |          |      |
| 65.0  | A0QSS4 | MSMEG_1583 | 88.0                         | LAGGVAIVK                   | ITRAQ4plex@N-term; Lys->Arg@9                                     |                                                  |                    | 0.00  | 998.63  | 500.32   | 998.64   | 500.33    | 2       | 1,471.3  |      |
| 65.0  | A0QSS4 | MSMEG_1583 | 87.0                         | AMEAGVDK                    | ITRAQ4plex@N-term; Lys->Arg@8                                     |                                                  |                    | 0.04  | 991.53  | 496.77   | 991.49   | 496.75    | 2       | 233.6    |      |
| 65.0  | A0QSS4 | MSMEG_1583 | 87.0                         | GQGFFAATLEFGLDLSAGVVDPAK    | ITRAQ4plex@N-term; Lys->Arg@24                                    |                                                  |                    | 0.01  | 2534.30 | 845.77   | 2534.29  | 845.77    | 3       | 86.4     |      |
| 65.0  | A0QSS4 | MSMEG_1583 | 85.0                         | DLLP LLEK                   | ITRAQ4plex@N-term; Lys->Gln@8                                     |                                                  | cleaved P-D@N-term | 0.03  | 1083.66 | 542.84   | 1083.63  | 542.82    | 2       | 1,273.7  |      |
| 65.0  | A0QSS4 | MSMEG_1583 | 84.0                         | DEQV GELVGEAMTK             | ITRAQ4plex@N-term; Oxidation(M)@12; ITRAQ4plex(T)@13; Lys->Gln@14 |                                                  |                    | -0.01 | 1808.86 | 603.96   | 1808.87  | 603.96    | 3       | 130.8    |      |
| 65.0  | A0QSS4 | MSMEG_1583 | 84.0                         | DLLP LLEK                   | ITRAQ4plex@N-term; Lys->Arg@8                                     |                                                  | cleaved P-D@N-term | 0.02  | 1111.69 | 556.85   | 1111.67  | 556.84    | 2       | 502.6    |      |
| 65.0  | A0QSS4 | MSMEG_1583 | 82.0                         | DSTVIVDGGGTAEAIADR          | ITRAQ4plex@N-term; Dimethyl(R)@18                                 |                                                  |                    | -0.01 | 1917.96 | 640.33   | 1917.98  | 640.33    | 3       | 17.4     |      |
| 65.0  | A0QSS4 | MSMEG_1583 | 82.0                         | VGAATETDLK                  | No ITRAQ4plex@N-term; ITRAQ4plex(T)@7; Lys->Gln@10                |                                                  |                    | 0.05  | 1147.63 | 574.82   | 1147.58  | 574.80    | 2       | 909.9    |      |
| 65.0  | A0QSS4 | MSMEG_1583 | 80.0                         | AMEAGVDK                    | ITRAQ4plex@N-term; Lys->Arg@8                                     |                                                  |                    | 0.05  | 991.54  | 496.78   | 991.49   | 496.75    | 2       | 834.9    |      |
| 65.0  | A0QSS4 | MSMEG_1583 | 75.0                         | DSTVIVDGGGTAEAIADR          | ITRAQ4plex@N-term; Dehydrated(S)@2                                |                                                  |                    | -0.03 | 1871.90 | 624.98   | 1871.93  | 624.99    | 3       |          |      |
| 65.0  | A0QSS4 | MSMEG_1583 | 75.0                         | TNDVAGDGTTTATVLAQALVR       | ITRAQ4plex@N-term; Asn->Val@2                                     |                                                  |                    | -0.07 | 2202.13 | 735.05   | 2202.20  | 735.07    | 3       |          |      |
| 13    | 63.8   | A0R652     | MSMEG_6427                   | 99.0                        | AEYTLPLDLDYDGALEPHISGQINELHH                                      | ITRAQ4plex@N-term; Lys->Gln@30                   | cleaved M-A@N-term | 0.02  | 3568.71 | 714.75   | 3568.69  | 714.74    | 5       | 106.2    |      |
| 63.8  | A0R652 | MSMEG_6427 | 99.0                         | AFWNVNVNDDVQNR              | ITRAQ4plex@N-term                                                 |                                                  |                    | -0.03 | 1905.90 | 636.31   | 1905.92  | 636.32    | 3       | 17.4     |      |
| 63.8  | A0R652 | MSMEG_6427 | 99.0                         | ANGDHAIFLNK                 | ITRAQ4plex@N-term; Lys->Gln@13                                    |                                                  |                    | 0.05  | 1542.81 | 515.28   | 1542.75  | 515.26    | 3       | 348.2    |      |
| 63.8  | A0R652 | MSMEG_6427 | 99.0                         | FQAQFTAAANGLQGSGWAVLGYDSLGI | ITRAQ4plex@N-term; Deamidated(N)@10                               |                                                  |                    | 0.01  | 2986.48 | 996.50   | 2986.47  | 996.50    | 3       | 58.6     |      |
| 63.8  | A0R652 | MSMEG_6427 | 99.0                         | FQAQFTAAANGLQGSGWAVLGYDSLGI | ITRAQ4plex@N-term                                                 |                                                  |                    | -0.06 | 2985.43 | 996.15   | 2985.49  | 996.17    | 3       | 19.6     |      |
| 63.8  | A0R652 | MSMEG_6427 | 99.0                         | FQAQFTAAANGLQGSGWAVLGYDSLGI | ITRAQ4plex@N-term                                                 |                                                  |                    | 0.07  | 2985.55 | 747.40   | 2985.49  | 747.38    | 4       | 18.5     |      |
| 63.8  | A0R652 | MSMEG_6427 | 98.0                         | NLSPNNGDKPTGELAAIDDFGFSFDK  | ITRAQ4plex@N-term; Lys->Gln@9; ITRAQ4plex(T)@11; Lys->Arg@27      |                                                  |                    | 0.07  | 3079.54 | 770.89   | 3079.47  | 770.88    | 4       | 29.4     |      |
| 63.8  | A0R652 | MSMEG_6427 | 95.0                         | FWNVNVDVQNR                 | ITRAQ4plex@N-term                                                 |                                                  | cleaved A-F@N-term | -0.05 | 1834.84 | 612.62   | 1834.89  | 612.64    | 3       | 18.5     |      |
| 63.8  | A0R652 | MSMEG_6427 | 85.0                         | GVNDAIAK                    | ITRAQ4plex@N-term; Lys->Gln@8                                     |                                                  |                    | 0.05  | 930.54  | 466.28   | 930.49   | 466.25    | 2       | 104.1    |      |
| 14    | 63.4   | A0R5H1     | MSMEG_6189                   | 99.0                        | AGIFQGVPTVAALTK                                                   | ITRAQ4plex@N-term; ITRAQ4plex(T)@16; Lys->Gln@17 |                    |       | 0.03    | 1960.11  | 654.38   | 1960.09   | 654.37  | 3        | 88.7 |
| 63.4  | A0R5H1 | MSMEG_6189 | 99.0                         | AWIADRP EIAEQLLR            | ITRAQ4plex@N-term; Dimethyl(R)@15                                 |                                                  |                    | -0.02 | 1952.08 | 651.70   | 1952.10  | 651.71    | 3       | 541.7    |      |
| 63.4  | A0R5H1 | MSMEG_6189 | 99.0                         | FGTQEGGALR                  | ITRAQ4plex@N-term                                                 |                                                  |                    | 0.04  | 1178.66 | 590.34   | 1178.62  | 590.32    | 2       | 7,074.4  |      |

Supplement Table 1A

| Index | % Cov  | Uniprot ID | Gene locus<br>(M. smegmatis) | Conf                        | Peptide Sequence                                                                                  | Modifications                                                                                      | Cleavages    | ΔMass | Prec MW | Prec m/z | Calc. MW | Calc. m/z | Theor z | Area 115 |
|-------|--------|------------|------------------------------|-----------------------------|---------------------------------------------------------------------------------------------------|----------------------------------------------------------------------------------------------------|--------------|-------|---------|----------|----------|-----------|---------|----------|
| 63.4  | A0R5H1 | MSMEG_6189 | 99.0                         | QLLQLAQR                    | iTRAQ4plex@N-term                                                                                 |                                                                                                    |              | 0.01  | 1112.68 | 557.35   | 1112.68  | 557.35    | 2       | 5.245.4  |
| 63.4  | A0R5H1 | MSMEG_6189 | 99.0                         | RTNNNLADLIFTDVPGR           | iTRAQ4plex@N-term                                                                                 |                                                                                                    | missed R-T@1 | -0.01 | 2059.08 | 687.37   | 2059.09  | 687.37    | 3       | 31.5     |
| 63.4  | A0R5H1 | MSMEG_6189 | 99.0                         | SVLISDSER                   | iTRAQ4plex@N-term                                                                                 |                                                                                                    |              | 0.00  | 1148.61 | 575.31   | 1148.62  | 575.32    | 2       | 7.420.8  |
| 63.4  | A0R5H1 | MSMEG_6189 | 99.0                         | TSSATTITEVR                 | iTRAQ4plex@N-term                                                                                 |                                                                                                    |              | 0.00  | 1308.71 | 655.36   | 1308.70  | 655.36    | 2       | 624.9    |
| 63.4  | A0R5H1 | MSMEG_6189 | 99.0                         | VTHDLTQEEIAQLVGASR          | iTRAQ4plex@N-term                                                                                 |                                                                                                    |              | 0.03  | 2110.14 | 704.39   | 2110.11  | 704.38    | 3       | 114.4    |
| 63.4  | A0R5H1 | MSMEG_6189 | 99.0                         | AWIADRPEIAEQLLR             | iTRAQ4plex@N-term                                                                                 |                                                                                                    |              | 0.01  | 1924.08 | 642.37   | 1924.07  | 642.36    | 3       | 206.9    |
| 63.4  | A0R5H1 | MSMEG_6189 | 99.0                         | VTHDLTQEEIAQLVGASR          | No iTRAQ4plex@N-term                                                                              |                                                                                                    |              | -0.03 | 1965.99 | 656.34   | 1966.01  | 656.34    | 3       | 83.0     |
| 63.4  | A0R5H1 | MSMEG_6189 | 89.0                         | TNNNLADLIFTDVPGR            | iTRAQ4plex@N-term                                                                                 |                                                                                                    |              | -0.05 | 1902.95 | 635.32   | 1902.99  | 635.34    | 3       | 100.6    |
| 63.4  | A0R5H1 | MSMEG_6189 | 79.0                         | AWIADRPEIAEQLLR             | iTRAQ4plex@N-term                                                                                 |                                                                                                    |              | -0.04 | 1924.03 | 642.35   | 1924.07  | 642.36    | 3       | 184.2    |
| 63.4  | A0R5H1 | MSMEG_6189 | 76.0                         | QLQPVDFFPR                  | iTRAQ4plex@N-term                                                                                 |                                                                                                    |              | 0.02  | 1242.70 | 622.36   | 1242.68  | 622.35    | 2       | 5.075.1  |
| 15    | 62.9   | A0QWW2     | MSMEG_3084                   | 99.0                        | VPIPTGSVTDLTAELAKSASVEDINA/                                                                       | iTRAQ4plex@N-term; Glu->Gln@14; User modH on Lys(K)@17; iTRAQ4plex(S)@18; Lys->Gln@2 missed K-S@17 |              | -0.08 | 3457.73 | 865.44   | 3457.81  | 865.46    | 4       | 124.7    |
| 62.9  | A0QWW2 | MSMEG_3084 | 99.0                         | AAAEGPLK                    | iTRAQ4plex@N-term; Lys->Gln@8                                                                     |                                                                                                    |              | 0.04  | 899.52  | 450.77   | 899.48   | 450.75    | 2       | 47.5     |
| 62.9  | A0QWW2 | MSMEG_3084 | 99.0                         | AAALNIVPTSTGAAK             | iTRAQ4plex@N-term; Lys->Gln@15                                                                    |                                                                                                    |              | 0.06  | 1527.90 | 764.96   | 1527.84  | 764.93    | 2       | 1.511.5  |
| 62.9  | A0QWW2 | MSMEG_3084 | 99.0                         | AIGLVLPK                    | iTRAQ4plex@N-term; Lys->Arg@10                                                                    |                                                                                                    |              | 0.02  | 1223.79 | 612.90   | 1223.77  | 612.89    | 2       | 389.6    |
| 62.9  | A0QWW2 | MSMEG_3084 | 99.0                         | GLMTTIHAYTQDQNLQDGPBK       | iTRAQ4plex@N-term; Lys->Gln@21                                                                    |                                                                                                    |              | 0.04  | 2511.23 | 628.81   | 2511.19  | 628.81    | 4       | 204.8    |
| 62.9  | A0QWW2 | MSMEG_3084 | 99.0                         | LADLVALVGK                  | iTRAQ4plex@N-term; Lys->Gln@10                                                                    |                                                                                                    |              | 0.04  | 1141.72 | 571.87   | 1141.68  | 571.85    | 2       | 853.2    |
| 62.9  | A0QWW2 | MSMEG_3084 | 99.0                         | NTDIEIVAVNDLTNATLAHLK       | iTRAQ4plex@N-term; Lys->Gln@23                                                                    |                                                                                                    |              | -0.01 | 2636.37 | 879.80   | 2636.38  | 879.80    | 3       | 46.7     |
| 62.9  | A0QWW2 | MSMEG_3084 | 99.0                         | SASVEDINAAMK                | iTRAQ4plex@N-term; Lys->Gln@12                                                                    |                                                                                                    |              | 0.06  | 1378.71 | 690.36   | 1378.65  | 690.33    | 2       | 999.6    |
| 62.9  | A0QWW2 | MSMEG_3084 | 99.0                         | GVVNGFGR                    | iTRAQ4plex@N-term; Deamidated(N)@4                                                                |                                                                                                    |              | 0.00  | 949.52  | 475.76   | 949.51   | 475.76    | 2       | 9.888.8  |
| 62.9  | A0QWW2 | MSMEG_3084 | 99.0                         | VLNDFGIVK                   | iTRAQ4plex@N-term; Lys->Arg@10                                                                    |                                                                                                    |              | 0.02  | 1304.74 | 653.38   | 1304.72  | 653.37    | 2       | 833.1    |
| 62.9  | A0QWW2 | MSMEG_3084 | 99.0                         | VPIPTGSVTDLTAELAK           | iTRAQ4plex@N-term; Lys->Gln@17                                                                    |                                                                                                    |              | 0.07  | 1855.08 | 928.55   | 1855.01  | 928.51    | 2       | 2.346.7  |
| 62.9  | A0QWW2 | MSMEG_3084 | 99.0                         | VVSWYDNEWGYSNR              | iTRAQ4plex@N-term                                                                                 |                                                                                                    |              | -0.02 | 1917.86 | 640.29   | 1917.88  | 640.30    | 3       | 733.9    |
| 62.9  | A0QWW2 | MSMEG_3084 | 99.0                         | YYDAPIVSSDIVTDPHSSLYDAGLTK  | iTRAQ4plex@N-term; iTRAQ4plex(T)@25; Lys->Gln@26                                                  |                                                                                                    |              | 0.01  | 3114.54 | 779.64   | 3114.53  | 779.64    | 4       | 451.5    |
| 62.9  | A0QWW2 | MSMEG_3084 | 99.0                         | LADLVALVGK                  | iTRAQ4plex@N-term; Lys->Arg@10                                                                    |                                                                                                    |              | 0.03  | 1169.76 | 585.89   | 1169.73  | 585.87    | 2       | 33.7     |
| 62.9  | A0QWW2 | MSMEG_3084 | 99.0                         | VLNDFGIVK                   | iTRAQ4plex@N-term; Lys->Gln@10                                                                    |                                                                                                    |              | 0.04  | 1276.72 | 639.37   | 1276.68  | 639.35    | 2       | 2.972.7  |
| 62.9  | A0QWW2 | MSMEG_3084 | 99.0                         | VPIPTGSVTDLTAELAK           | iTRAQ4plex@N-term; Lys->Gln@17                                                                    |                                                                                                    |              | 0.00  | 1855.00 | 619.34   | 1855.01  | 619.34    | 3       | 15.2     |
| 62.9  | A0QWW2 | MSMEG_3084 | 99.0                         | VPIPTGSVTDLTAELAK           | iTRAQ4plex@N-term; Lys->Arg@17                                                                    |                                                                                                    |              | -0.02 | 1883.03 | 628.68   | 1883.05  | 628.69    | 3       | 32.6     |
| 62.9  | A0QWW2 | MSMEG_3084 | 98.0                         | AIGLVLPK                    | iTRAQ4plex@N-term; Lys->Gln@10                                                                    |                                                                                                    |              | 0.03  | 1195.76 | 598.89   | 1195.73  | 598.87    | 2       | 332.5    |
| 62.9  | A0QWW2 | MSMEG_3084 | 97.0                         | AAALNIVPTSTGAAK             | iTRAQ4plex@N-term; iTRAQ4plex(T)@11; Lys->Gln@15                                                  |                                                                                                    |              | 0.00  | 1671.94 | 558.32   | 1671.94  | 558.32    | 3       | 915.4    |
| 62.9  | A0QWW2 | MSMEG_3084 | 97.0                         | GVVNGFGR                    | iTRAQ4plex@N-term                                                                                 |                                                                                                    |              | 0.00  | 948.52  | 475.27   | 948.53   | 475.27    | 2       | 957.1    |
| 62.9  | A0QWW2 | MSMEG_3084 | 97.0                         | VPIPTGSVTDLTAELAK           | iTRAQ4plex@N-term; iTRAQ4plex(T)@12; Lys->Gln@17                                                  |                                                                                                    |              | -0.02 | 1999.08 | 667.37   | 1999.11  | 667.38    | 3       | 343.0    |
| 62.9  | A0QWW2 | MSMEG_3084 | 94.0                         | FDSILGR                     | iTRAQ4plex@N-term                                                                                 |                                                                                                    |              | -0.03 | 950.50  | 476.26   | 950.53   | 476.27    | 2       | 10.231.5 |
| 62.9  | A0QWW2 | MSMEG_3084 | 93.0                         | LDGYALR                     | iTRAQ4plex@N-term                                                                                 |                                                                                                    |              | -0.01 | 950.52  | 476.27   | 950.53   | 476.27    | 2       | 7.938.9  |
| 62.9  | A0QWW2 | MSMEG_3084 | 92.0                         | VPIPTGSVTDLTAELAKSASVEDINA/ | iTRAQ4plex@N-term; User modH on Lys(K)@17; Ser->Met@20; Deamidated(N)@25; User modH missed K-S@17 |                                                                                                    |              | 0.10  | 3602.93 | 901.74   | 3602.83  | 901.71    | 4       | 339.3    |
| 62.9  | A0QWW2 | MSMEG_3084 | 88.0                         | GVVNGFGR                    | iTRAQ4plex@N-term; Deamidated(N)@4                                                                |                                                                                                    |              | 0.01  | 949.52  | 475.77   | 949.51   | 475.76    | 2       | 4.651.7  |
| 62.9  | A0QWW2 | MSMEG_3084 | 86.0                         | YYDAPIVSSDIVTDPHSSLYDAGLTK  | iTRAQ4plex@N-term; Asp->Asn@14; iTRAQ4plex(T)@25; Lys->Gln@26                                     |                                                                                                    |              | 0.11  | 3113.65 | 779.42   | 3113.54  | 779.39    | 4       | 153.5    |
| 62.9  | A0QWW2 | MSMEG_3084 | 82.0                         | LADLVALVGK                  | iTRAQ4plex@N-term; Lys->Arg@10                                                                    |                                                                                                    |              | 0.00  | 1169.72 | 585.87   | 1169.73  | 585.87    | 2       | 168.1    |
| 62.9  | A0QWW2 | MSMEG_3084 | 77.0                         | SASVEDINAAMK                | iTRAQ4plex@N-term; Deamidated(N)@8; Lys->Arg@12                                                   |                                                                                                    |              | 0.03  | 1407.71 | 704.86   | 1407.68  | 704.85    | 2       | 599.8    |
| 16    | 61.8   | Q9AF15     | MSMEG_6896                   | 99.0                        | DGEALFLR                                                                                          | iTRAQ4plex@N-term                                                                                  |              | -0.01 | 1063.57 | 532.79   | 1063.58  | 532.80    | 2       | 1.728.3  |
| 61.8  | Q9AF15 | MSMEG_6896 | 99.0                         | EAAENVAESLTR                | iTRAQ4plex@N-term                                                                                 |                                                                                                    |              | 0.01  | 1432.74 | 717.38   | 1432.73  | 717.37    | 2       | 2.757.0  |
| 61.8  | Q9AF15 | MSMEG_6896 | 99.0                         | SGGGGGFGSGGGGSR             | No iTRAQ4plex@N-term; Gly->Pro@2                                                                  |                                                                                                    |              | 0.01  | 1249.55 | 625.78   | 1249.54  | 625.78    | 2       |          |
| 61.8  | Q9AF15 | MSMEG_6896 | 99.0                         | TVVEVEVDEIGPSLR             | iTRAQ4plex@N-term                                                                                 |                                                                                                    |              | -0.02 | 1784.95 | 595.99   | 1784.96  | 596.00    | 3       |          |
| 61.8  | Q9AF15 | MSMEG_6896 | 99.0                         | SGGGGGFGSGGGGSR             | iTRAQ4plex@N-term                                                                                 |                                                                                                    |              | 0.01  | 1353.63 | 452.22   | 1353.61  | 452.21    | 3       | 15.2     |
| 17    | 60.9   | A0QZA1     | MSMEG_3950                   | 99.0                        | TLIDASKAQMVVGNR                                                                                   | iTRAQ4plex@N-term; User modH on Lys(K)@7; iTRAQ4plex(S)@8                                          | missed K-S@7 | 0.02  | 2319.29 | 774.10   | 2319.27  | 774.10    | 3       | 749.1    |
| 60.9  | A0QZA1 | MSMEG_3950 | 99.0                         | AQPAYWLEEK                  | iTRAQ4plex@N-term; Lys->Gln@12                                                                    |                                                                                                    |              | 0.02  | 1561.81 | 781.91   | 1561.79  | 781.90    | 2       | 2.308.0  |
| 60.9  | A0QZA1 | MSMEG_3950 | 99.0                         | LPVLLGIDGSPASEVATSHAFDEASR  | iTRAQ4plex@N-term                                                                                 |                                                                                                    |              | 0.05  | 2782.47 | 928.50   | 2782.43  | 928.48    | 3       | 1.021.0  |
| 60.9  | A0QZA1 | MSMEG_3950 | 99.0                         | MATVLECCQENAR               | iTRAQ4plex@N-term; Pyridylethyl(C)@7                                                              | cleaved Y-M@N-term                                                                                 |              | 0.02  | 1741.84 | 581.62   | 1741.82  | 581.62    | 3       | 790.4    |
| 60.9  | A0QZA1 | MSMEG_3950 | 99.0                         | QAQLVVVSHGR                 | iTRAQ4plex@N-term                                                                                 |                                                                                                    |              | 0.01  | 1393.81 | 465.61   | 1393.79  | 465.60    | 3       | 530.3    |
| 60.9  | A0QZA1 | MSMEG_3950 | 99.0                         | SAQMVVVGNR                  | iTRAQ4plex@N-term                                                                                 |                                                                                                    |              | 0.03  | 1203.68 | 602.85   | 1203.65  | 602.83    | 2       | 2.574.1  |
| 60.9  | A0QZA1 | MSMEG_3950 | 99.0                         | VAQSATTPVMVVR               | iTRAQ4plex@N-term                                                                                 | cleaved R-P@C-term                                                                                 |              | 0.00  | 1501.84 | 751.93   | 1501.84  | 751.93    | 2       | 4.931.7  |
| 60.9  | A0QZA1 | MSMEG_3950 | 99.0                         | VAQSATTPVMVVR               | iTRAQ4plex@N-term                                                                                 |                                                                                                    |              | 0.03  | 1755.02 | 586.01   | 1754.99  | 586.01    | 3       | 3.593.7  |
| 60.9  | A0QZA1 | MSMEG_3950 | 99.0                         | LPVLLGIDGSPASEVATSHAFDEASR  | iTRAQ4plex@N-term                                                                                 |                                                                                                    |              | 0.00  | 2782.43 | 928.48   | 2782.43  | 928.48    | 3       | 142.2    |
| 60.9  | A0QZA1 | MSMEG_3950 | 99.0                         | LPVLLGIDGSPASEVATSHAFDEASR  | iTRAQ4plex@N-term; Dimethyl(R)@26                                                                 |                                                                                                    |              | 0.08  | 2810.54 | 937.85   | 2810.46  | 937.83    | 3       | 81.4     |
| 60.9  | A0QZA1 | MSMEG_3950 | 99.0                         | VQSATEYGLVGVDSAESDAVR       | iTRAQ4plex@N-term                                                                                 | cleaved M-V@N-term                                                                                 |              | -0.04 | 2567.24 | 856.76   | 2567.28  | 856.77    | 3       | 17.4     |
| 60.9  | A0QZA1 | MSMEG_3950 | 99.0                         | VQSATEYGLVGVDSAESDAVR       | iTRAQ4plex@N-term                                                                                 | cleaved M-V@N-term                                                                                 |              | -0.06 | 2567.23 | 856.75   | 2567.28  | 856.77    | 3       |          |
| 60.9  | A0QZA1 | MSMEG_3950 | 91.0                         | EASLHDAPITLM                | iTRAQ4plex@N-term                                                                                 | cleaved M-H@C-term                                                                                 |              | 0.02  | 1440.76 | 721.39   | 1440.74  | 721.38    | 2       | 125.1    |
| 60.9  | A0QZA1 | MSMEG_3950 | 75.0                         | GMGALGR                     | iTRAQ4plex@N-term                                                                                 |                                                                                                    |              | 0.01  | 804.45  | 403.23   | 804.44   | 403.23    | 2       | 6.225.7  |



Supplement Table 1A

| Index | % Cov  | Uniprot ID | Gene locus<br>(M. smegmatis) | Conf                   | Peptide Sequence                                 | Modifications                                                              | Cleavages                        | ΔMass   | Prec MW | Prec m/z | Calc. MW | Calc. m/z | Theor z  | Area 115 |
|-------|--------|------------|------------------------------|------------------------|--------------------------------------------------|----------------------------------------------------------------------------|----------------------------------|---------|---------|----------|----------|-----------|----------|----------|
| 18    | 59.9   | A0R4C9     | MSMEG_5789                   | 99.0                   | DFVDAQQFSKLLSER                                  | iTRAQ4plex@N-term; iTRAQ4plex(S)@9; User modH on Lys(K)@10                 | missed K-L@10                    | -0.04   | 2313.17 | 772.06   | 2313.21  | 772.08    | 3        | 771.4    |
|       | 59.9   | A0R4C9     | MSMEG_5789                   | 99.0                   | DFVDAQQFSK                                       | iTRAQ4plex@N-term; Lys->Gln@10                                             |                                  | 0.04    | 1327.66 | 664.83   | 1327.62  | 664.82    | 2        | 936.7    |
|       | 59.9   | A0R4C9     | MSMEG_5789                   | 99.0                   | ILAPAHLPQEQSQR                                   | iTRAQ4plex@N-term                                                          | cleaved R-P@C-term               | 0.00    | 1730.95 | 577.99   | 1730.95  | 577.99    | 3        | 1.091.5  |
|       | 59.9   | A0R4C9     | MSMEG_5789                   | 99.0                   | SSHTWFWLQELLGHK                                  | No iTRAQ4plex@N-term; Lys->Gln@15                                          |                                  | 0.02    | 1780.91 | 446.24   | 1780.89  | 446.23    | 4        |          |
|       | 59.9   | A0R4C9     | MSMEG_5789                   | 99.0                   | IDLQDPIR                                         | iTRAQ4plex@N-term                                                          |                                  | 0.01    | 1100.61 | 551.31   | 1100.59  | 551.30    | 2        | 8.822.7  |
|       | 59.9   | A0R4C9     | MSMEG_5789                   | 99.0                   | IDLQDPIRR                                        | iTRAQ4plex@N-term                                                          | missed R-R@8                     | 0.00    | 1256.69 | 419.90   | 1256.70  | 419.91    | 3        | 962.2    |
|       | 59.9   | A0R4C9     | MSMEG_5789                   | 98.0                   | DFVDAQQFSKLLSER                                  | iTRAQ4plex@N-term; iTRAQ4plex(S)@9; User modH on Lys(K)@10                 | missed K-L@10                    | -0.02   | 2313.19 | 579.30   | 2313.21  | 579.31    | 4        | 90.2     |
|       | 59.9   | A0R4C9     | MSMEG_5789                   | 97.0                   | NVKNYDGSWTEYGLVGAPELGS                           | iTRAQ4plex@N-term; Lys->Asn@3                                              | missed K-N@3                     | 0.04    | 2685.31 | 896.11   | 2685.27  | 896.10    | 3        | 87.7     |
|       | 59.9   | A0R4C9     | MSMEG_5789                   | 96.0                   | IDLQDPIR                                         | iTRAQ4plex@N-term; Dimethyl(R)@8                                           |                                  | -0.01   | 1128.62 | 565.32   | 1128.63  | 565.32    | 2        | 3.608.5  |
|       | 59.9   | A0R4C9     | MSMEG_5789                   | 92.0                   | DFVDAQQFSKLLSER                                  | iTRAQ4plex@N-term; iTRAQ4plex(S)@9; User modH on Lys(K)@10; Dimethyl(R)@15 | missed K-L@10                    | -0.03   | 2341.21 | 586.31   | 2341.24  | 586.32    | 4        | 209.5    |
| 19    | 58.4   | A0QVQ3     | MSMEG_2654                   | 99.0                   | GLLLLVR                                          | iTRAQ4plex@N-term                                                          |                                  | -0.04   | 983.62  | 492.82   | 983.66   | 492.84    | 2        | 1.062.7  |
|       | 58.4   | A0QVQ3     | MSMEG_2654                   | 99.0                   | YVAQDVVAR                                        | iTRAQ4plex@N-term                                                          |                                  | 0.00    | 1163.64 | 582.83   | 1163.64  | 582.83    | 2        | 2.251.9  |
|       | 58.4   | A0QVQ3     | MSMEG_2654                   | 99.0                   | EILGQYGLHDDTGTGSPAEQVALLTK                       | iTRAQ4plex@N-term; iTRAQ4plex(T)@24; Lys->Gln@25                           |                                  | -0.01   | 2943.49 | 736.88   | 2943.51  | 736.88    | 4        | 208.1    |
|       | 58.4   | A0QVQ3     | MSMEG_2654                   | 97.0                   | IQDLTEHLK                                        | iTRAQ4plex@N-term; Lys->Gln@9                                              |                                  | 0.03    | 1239.69 | 414.24   | 1239.66  | 414.23    | 3        | 638.1    |
|       | 58.4   | A0QVQ3     | MSMEG_2654                   | 84.0                   | GLLLLVR                                          | iTRAQ4plex@N-term; Dimethyl(R)@8                                           |                                  | 0.01    | 1011.70 | 506.86   | 1011.69  | 506.85    | 2        | 107.6    |
| 20    | 56.9   | A0QQU5     | MSMEG_0880                   | 99.0                   | AEIENSDDYDR                                      | iTRAQ4plex@N-term; Deamidated(N)@5                                         |                                  | 0.00    | 1557.65 | 779.83   | 1557.66  | 779.83    | 2        | 210.2    |
|       | 56.9   | A0QQU5     | MSMEG_0880                   | 99.0                   | AEIENSDDYDREK                                    | iTRAQ4plex@N-term; Lys->Arg@14                                             | missed R-E@12                    | 0.08    | 1841.89 | 614.97   | 1841.81  | 614.95    | 3        | 429.8    |
|       | 56.9   | A0QQU5     | MSMEG_0880                   | 99.0                   | AGAATEVELK                                       | iTRAQ4plex@N-term; Lys->Gln@10                                             |                                  | 0.05    | 1131.64 | 566.83   | 1131.59  | 566.80    | 2        | 941.3    |
|       | 56.9   | A0QQU5     | MSMEG_0880                   | 99.0                   | GLNSLADAVK                                       | iTRAQ4plex@N-term; Deamidated(N)@3; Lys->Arg@10                            |                                  | 0.01    | 1159.64 | 580.83   | 1159.63  | 580.82    | 2        | 1.420.5  |
|       | 56.9   | A0QQU5     | MSMEG_0880                   | 99.0                   | GYISGYFVDAER                                     | iTRAQ4plex@N-term                                                          |                                  | 0.01    | 1620.80 | 811.41   | 1620.79  | 811.40    | 2        | 1.535.8  |
|       | 56.9   | A0QQU5     | MSMEG_0880                   | 99.0                   | IAYDEEAR                                         | iTRAQ4plex@N-term                                                          | cleaved T-I@N-term; missed R-R@8 | 0.01    | 1265.66 | 422.89   | 1265.65  | 422.89    | 3        | 476.1    |
|       | 56.9   | A0QQU5     | MSMEG_0880                   | 99.0                   | ISGYFVDAER                                       | iTRAQ4plex@N-term                                                          | cleaved Y-I@N-term               | 0.00    | 1400.71 | 701.36   | 1400.71  | 701.36    | 2        | 634.8    |
|       | 56.9   | A0QQU5     | MSMEG_0880                   | 99.0                   | KTDDVAGDGTTTATVLAQALVR                           | iTRAQ4plex@N-term; Lys->Gln@1                                              | missed K-T@1                     | 0.02    | 2346.24 | 783.09   | 2346.21  | 783.08    | 3        | 565.7    |
|       | 56.9   | A0QQU5     | MSMEG_0880                   | 99.0                   | NVAAGANPLGK                                      | iTRAQ4plex@N-term; Lys->Arg@12                                             |                                  | 0.04    | 1295.78 | 648.90   | 1295.74  | 648.88    | 2        | 2.602.8  |
|       | 56.9   | A0QQU5     | MSMEG_0880                   | 99.0                   | QEAILEDYILLVSSK                                  | iTRAQ4plex@N-term; iTRAQ4plex(S)@15; Lys->Gln@16                           |                                  | 0.03    | 2091.16 | 698.06   | 2091.13  | 698.05    | 3        | 1.327.1  |
|       | 56.9   | A0QQU5     | MSMEG_0880                   | 99.0                   | SGYFVDAER                                        | iTRAQ4plex@N-term                                                          | cleaved I-S@N-term               | 0.02    | 1287.65 | 644.83   | 1287.62  | 644.82    | 2        | 1.986.9  |
|       | 56.9   | A0QQU5     | MSMEG_0880                   | 99.0                   | TIAYDEEAR                                        | iTRAQ4plex@N-term; Ala->Val@8                                              |                                  | 0.02    | 1238.65 | 620.33   | 1238.63  | 620.32    | 2        | 560.2    |
|       | 56.9   | A0QQU5     | MSMEG_0880                   | 99.0                   | TIAYDEEAR                                        | iTRAQ4plex@N-term                                                          | missed R-R@9                     | 0.00    | 1366.70 | 456.57   | 1366.70  | 456.57    | 3        | 4.093.0  |
|       | 56.9   | A0QQU5     | MSMEG_0880                   | 99.0                   | VGNEGVIIVVEESNTFGLQLELTEGMR                      | iTRAQ4plex@N-term                                                          |                                  | -0.08   | 2965.40 | 989.47   | 2965.48  | 989.50    | 3        | 9.8      |
|       | 56.9   | A0QQU5     | MSMEG_0880                   | 99.0                   | VSNLPAGHGLNAATGEYEDLLAAGVADI                     | iTRAQ4plex@N-term; Lys->Arg@30                                             |                                  | 0.10    | 3120.70 | 781.18   | 3120.60  | 781.16    | 4        | 28.0     |
|       | 56.9   | A0QQU5     | MSMEG_0880                   | 99.0                   | WGAPTITNDGVSIK                                   | iTRAQ4plex@N-term; Lys->Arg@15                                             |                                  | 0.01    | 1700.91 | 851.46   | 1700.90  | 851.46    | 2        | 1.239.2  |
|       | 56.9   | A0QQU5     | MSMEG_0880                   | 99.0                   | AEIENSDDYDR                                      | iTRAQ4plex@N-term                                                          |                                  | 0.03    | 1556.70 | 779.36   | 1556.67  | 779.34    | 2        | 1.113.1  |
|       | 56.9   | A0QQU5     | MSMEG_0880                   | 99.0                   | AEIENSDDYDR                                      | iTRAQ4plex@N-term; Dimethyl(R)@12                                          |                                  | 0.00    | 1584.70 | 793.36   | 1584.70  | 793.36    | 2        | 256.8    |
|       | 56.9   | A0QQU5     | MSMEG_0880                   | 99.0                   | AEIENSDDYDREK                                    | iTRAQ4plex@N-term; iTRAQ4plex(Y)@10; Lys->Gln@14                           | missed R-E@12                    | 0.07    | 1957.94 | 653.65   | 1957.87  | 653.63    | 3        | 1.917.0  |
|       | 56.9   | A0QQU5     | MSMEG_0880                   | 99.0                   | AEIENSDDYDREK                                    | iTRAQ4plex@N-term; Lys->Gln@14                                             | missed R-E@12                    | 0.08    | 1813.85 | 605.62   | 1813.77  | 605.60    | 3        | 609.1    |
|       | 56.9   | A0QQU5     | MSMEG_0880                   | 99.0                   | DETTIVEGAGDAEAIQGR                               | iTRAQ4plex@N-term                                                          |                                  | 0.01    | 1974.97 | 988.49   | 1974.96  | 988.49    | 2        | 450.1    |
|       | 56.9   | A0QQU5     | MSMEG_0880                   | 99.0                   | DETTIVEGAGDAEAIQGR                               | iTRAQ4plex@N-term; Gln->Arg@16                                             |                                  | -0.02   | 2002.98 | 668.67   | 2003.00  | 668.68    | 3        | 116.7    |
|       | 56.9   | A0QQU5     | MSMEG_0880                   | 99.0                   | DETTIVEGAGDAEAIQGR                               | iTRAQ4plex@N-term                                                          |                                  | -0.07   | 1974.89 | 659.30   | 1974.96  | 659.33    | 3        | 15.2     |
|       | 56.9   | A0QQU5     | MSMEG_0880                   | 99.0                   | GLNSLADAVK                                       | iTRAQ4plex@N-term; Lys->Gln@10                                             |                                  | 0.05    | 1130.65 | 566.33   | 1130.61  | 566.31    | 2        | 3.600.6  |
|       | 56.9   | A0QQU5     | MSMEG_0880                   | 99.0                   | GLNSLADAVK                                       | iTRAQ4plex@N-term; Lys->Arg@10                                             |                                  | 0.00    | 1158.65 | 580.33   | 1158.65  | 580.33    | 2        | 915.2    |
|       | 56.9   | A0QQU5     | MSMEG_0880                   | 99.0                   | GYISGYFVDAER                                     | iTRAQ4plex@N-term                                                          |                                  | -0.01   | 1620.78 | 811.40   | 1620.79  | 811.40    | 2        | 218.8    |
|       | 56.9   | A0QQU5     | MSMEG_0880                   | 99.0                   | GYISGYFVDAER                                     | iTRAQ4plex@N-term                                                          |                                  | 0.00    | 1620.80 | 811.41   | 1620.79  | 811.40    | 2        | 1.682.6  |
|       | 56.9   | A0QQU5     | MSMEG_0880                   | 99.0                   | GYISGYFVDAER                                     | iTRAQ4plex@N-term                                                          |                                  | -0.02   | 1620.77 | 811.39   | 1620.79  | 811.40    | 2        | 965.6    |
|       | 56.9   | A0QQU5     | MSMEG_0880                   | 99.0                   | GYISGYFVDAER                                     | iTRAQ4plex@N-term                                                          |                                  | 0.01    | 1620.80 | 811.41   | 1620.79  | 811.40    | 2        | 1.017.0  |
|       | 56.9   | A0QQU5     | MSMEG_0880                   | 99.0                   | GYISGYFVDAER                                     | iTRAQ4plex@N-term                                                          |                                  | -0.02   | 1620.77 | 811.39   | 1620.79  | 811.40    | 2        | 48.9     |
|       | 56.9   | A0QQU5     | MSMEG_0880                   | 99.0                   | GYISGYFVDAER                                     | iTRAQ4plex@N-term                                                          |                                  | 0.07    | 1620.86 | 811.44   | 1620.79  | 811.40    | 2        | 47.7     |
|       | 56.9   | A0QQU5     | MSMEG_0880                   | 99.0                   | GYISGYFVDAER                                     | iTRAQ4plex@N-term; Ala->Val@11                                             |                                  | 0.04    | 1648.86 | 550.63   | 1648.82  | 550.61    | 3        | 6.5      |
|       | 56.9   | A0QQU5     | MSMEG_0880                   | 99.0                   | GYISGYFVDAER                                     | iTRAQ4plex@N-term; Dimethyl(R)@13                                          |                                  | -0.02   | 1648.80 | 825.41   | 1648.82  | 825.42    | 2        | 2.556.1  |
|       | 56.9   | A0QQU5     | MSMEG_0880                   | 99.0                   | KTDDVAGDGTTTATVLAQALVR                           | iTRAQ4plex@N-term; Lys->Gln@1; iTRAQ4plex(T)@2                             | missed K-T@1                     | 0.06    | 2490.37 | 831.13   | 2490.32  | 831.11    | 3        | 226.4    |
|       | 56.9   | A0QQU5     | MSMEG_0880                   | 99.0                   | KTDDVAGDGTTTATVLAQALVR                           | iTRAQ4plex@N-term; Lys->Gln@1; iTRAQ4plex(T)@2; Ala->Val@19                | missed K-T@1                     | 0.00    | 2518.35 | 630.60   | 2518.35  | 630.59    | 4        | 22.7     |
|       | 56.9   | A0QQU5     | MSMEG_0880                   | 99.0                   | KTDDVAGDGTTTATVLAQALVR                           | iTRAQ4plex@N-term; Lys->Gln@1                                              | missed K-T@1                     | 0.01    | 2346.23 | 783.08   | 2346.21  | 783.08    | 3        | 109.2    |
| 56.9  | A0QQU5 | MSMEG_0880 | 99.0                         | KTDDVAGDGTTTATVLAQALVR | iTRAQ4plex@N-term; Lys->Gln@1; Dimethyl(R)@22    | missed K-T@1                                                               | 0.07                             | 2374.32 | 792.45  | 2374.25  | 792.42   | 3         | 175.1    |          |
| 56.9  | A0QQU5 | MSMEG_0880 | 99.0                         | NVAAGANPLGK            | iTRAQ4plex@N-term; Lys->Gln@12                   |                                                                            | 0.03                             | 1267.73 | 634.87  | 1267.70  | 634.86   | 2         | 12.518.6 |          |
| 56.9  | A0QQU5 | MSMEG_0880 | 99.0                         | QEAILEDYILLVSSK        | iTRAQ4plex@N-term; iTRAQ4plex(S)@15; Lys->Gln@16 |                                                                            | -0.03                            | 2091.10 | 698.04  | 2091.13  | 698.05   | 3         | 151.1    |          |
| 56.9  | A0QQU5 | MSMEG_0880 | 99.0                         | TDDVAGDGTTTATVLAQALVR  | iTRAQ4plex@N-term; Asp->Asn@7                    |                                                                            | 0.02                             | 2217.19 | 740.07  | 2217.17  | 740.06   | 3         | 17.1     |          |
| 56.9  | A0QQU5 | MSMEG_0880 | 99.0                         | TDDVAGDGTTTATVLAQALVR  | iTRAQ4plex@N-term; Asp->Asn@7; Dimethyl(R)@21    |                                                                            | -0.02                            | 2245.18 | 749.40  | 2245.20  | 749.41   | 3         | 18.3     |          |
| 56.9  | A0QQU5 | MSMEG_0880 | 99.0                         | TIAYDEEAR              | Carbamyl@N-term                                  |                                                                            | 0.05                             | 1109.55 | 555.78  | 1109.50  | 555.76   | 2         | 975.1    |          |
| 56.9  | A0QQU5 | MSMEG_0880 | 99.0                         | TIAYDEEAR              | iTRAQ4plex@N-term                                |                                                                            | 0.02                             | 1210.62 | 606.32  | 1210.60  | 606.30   | 2         | 376.9    |          |
| 56.9  | A0QQU5 | MSMEG_0880 | 99.0                         | TIAYDEEAR              | iTRAQ4plex@N-term                                |                                                                            | 0.00                             | 1210.59 | 606.30  | 1210.60  | 606.30   | 2         | 683.8    |          |

Supplement Table 1A

| Index | % Cov | Uniprot ID | Gene locus (M. smegmatis) | Conf | Peptide Sequence                 | Modifications                                                          | Cleavages          | ΔMass | Prec MW | Prec m/z | Calc. MW | Calc. m/z | Theor z | Area 115 |
|-------|-------|------------|---------------------------|------|----------------------------------|------------------------------------------------------------------------|--------------------|-------|---------|----------|----------|-----------|---------|----------|
|       | 56.9  | A0QQU5     | MSMEG_0880                | 99.0 | TIAYDEEAR                        | iTRAQ4plex@N-term; Ala->Val@8                                          |                    | 0.02  | 1238.64 | 620.33   | 1238.63  | 620.32    | 2       | 177.3    |
|       | 56.9  | A0QQU5     | MSMEG_0880                | 99.0 | VSNLPAGHGLNAATGEYEDLLAAGVADI     | iTRAQ4plex@N-term; Lys->Gln@30                                         |                    | 0.02  | 3092.57 | 1031.87  | 3092.55  | 1031.86   | 3       | 912.3    |
|       | 56.9  | A0QQU5     | MSMEG_0880                | 99.0 | VSNLPAGHGLNAATGEYEDLLAAGVADI     | iTRAQ4plex@N-term; Lys->Gln@30                                         |                    | 0.07  | 3092.63 | 1031.88  | 3092.55  | 1031.86   | 3       | 96.6     |
|       | 56.9  | A0QQU5     | MSMEG_0880                | 99.0 | VSNLPAGHGLNAATGEYEDLLAAGVADI     | No iTRAQ4plex@N-term; Lys->Gln@30                                      |                    | 0.00  | 2948.45 | 983.82   | 2948.45  | 983.82    | 3       | 21.7     |
|       | 56.9  | A0QQU5     | MSMEG_0880                | 99.0 | WGAPITITNDGVSIAK                 | iTRAQ4plex@N-term; Lys->Gln@15                                         |                    | 0.02  | 1672.87 | 837.44   | 1672.85  | 837.43    | 2       | 1.407.7  |
|       | 56.9  | A0QQU5     | MSMEG_0880                | 99.0 | WGAPITITNDGVSIAK                 | iTRAQ4plex@N-term; iTRAQ4plex(S)@12; Lys->Gln@15                       |                    | 0.04  | 1817.00 | 606.67   | 1816.96  | 606.66    | 3       | 819.9    |
|       | 56.9  | A0QQU5     | MSMEG_0880                | 99.0 | WGAPITITNDGVSIAK                 | iTRAQ4plex@N-term; iTRAQ4plex(S)@12; Lys->Gln@15                       |                    | 0.05  | 1817.01 | 606.68   | 1816.96  | 606.66    | 3       | 1.055.5  |
|       | 56.9  | A0QQU5     | MSMEG_0880                | 99.0 | WGAPITITNDGVSIAK                 | iTRAQ4plex@N-term; iTRAQ4plex(S)@12; Lys->Gln@15                       |                    | 0.05  | 1817.00 | 606.68   | 1816.96  | 606.66    | 3       | 1.282.1  |
|       | 56.9  | A0QQU5     | MSMEG_0880                | 98.0 | LAGGVAVIK                        | iTRAQ4plex@N-term; Lys->Gln@9                                          |                    | 0.02  | 970.61  | 486.31   | 970.59   | 486.30    | 2       | 6.055.9  |
|       | 56.9  | A0QQU5     | MSMEG_0880                | 97.0 | LAGGVAVIK                        | iTRAQ4plex@N-term; Lys->Gln@9                                          |                    | 0.04  | 970.63  | 486.32   | 970.59   | 486.30    | 2       | 1.332.1  |
|       | 56.9  | A0QQU5     | MSMEG_0880                | 96.0 | WGAPITITNDGVSIAK                 | iTRAQ4plex@N-term; iTRAQ4plex(S)@12; Lys->Gln@15                       |                    | 0.02  | 1816.97 | 606.67   | 1816.96  | 606.66    | 3       | 1.147.2  |
|       | 56.9  | A0QQU5     | MSMEG_0880                | 95.0 | GAPITITNDGVSIAK                  | iTRAQ4plex@N-term; iTRAQ4plex(S)@11; Lys->Gln@14                       | cleaved W-G@N-term | 0.03  | 1630.90 | 544.64   | 1630.88  | 544.63    | 3       | 535.4    |
|       | 56.9  | A0QQU5     | MSMEG_0880                | 94.0 | GLNSLADAVK                       | iTRAQ4plex@N-term; Deamidated(N)@3; Lys->Gln@10                        |                    | 0.05  | 1131.64 | 566.83   | 1131.59  | 566.80    | 2       | 6.042.0  |
|       | 56.9  | A0QQU5     | MSMEG_0880                | 94.0 | GLNSLADAVK                       | iTRAQ4plex@N-term; Lys->Gln@10                                         |                    | 0.04  | 1130.64 | 566.33   | 1130.61  | 566.31    | 2       | 1.262.3  |
|       | 56.9  | A0QQU5     | MSMEG_0880                | 94.0 | GYISGYFVTD AER                   | iTRAQ4plex@N-term; Dimethyl(R)@13                                      |                    | 0.05  | 1648.87 | 550.63   | 1648.82  | 550.61    | 3       |          |
|       | 56.9  | A0QQU5     | MSMEG_0880                | 93.0 | KVGA P TITNDGVSIAK               | iTRAQ4plex@N-term; Lys->Gln@1; Lys->Gln@16                             | missed K-W@1       | 0.07  | 1800.99 | 601.34   | 1800.91  | 601.31    | 3       | 196.8    |
|       | 56.9  | A0QQU5     | MSMEG_0880                | 93.0 | GYISGYFVTD AER                   | iTRAQ4plex@N-term; Oxidation(F)@7; Val->Asn@8                          |                    | 0.06  | 1651.82 | 551.61   | 1651.76  | 551.59    | 3       |          |
|       | 56.9  | A0QQU5     | MSMEG_0880                | 88.0 | NVAAGANPLGLKR                    | iTRAQ4plex@N-term; User modH on Lys(K)@12; Oxidation(R)@13             | missed K-R@12      | 0.00  | 1682.95 | 842.48   | 1682.94  | 842.48    | 2       | 1.157.9  |
|       | 56.9  | A0QQU5     | MSMEG_0880                | 88.0 | LAGGVAVIK                        | iTRAQ4plex@N-term; Lys->Arg@9                                          |                    | 0.00  | 998.63  | 500.32   | 998.64   | 500.33    | 2       | 1.471.3  |
|       | 56.9  | A0QQU5     | MSMEG_0880                | 85.0 | DLLP LLEK                        | iTRAQ4plex@N-term; Lys->Gln@8                                          |                    | 0.03  | 1083.66 | 542.84   | 1083.63  | 542.82    | 2       | 1.273.7  |
|       | 56.9  | A0QQU5     | MSMEG_0880                | 84.0 | DLLP LLEK                        | iTRAQ4plex@N-term; Lys->Arg@8                                          |                    | 0.02  | 1111.69 | 556.85   | 1111.67  | 556.84    | 2       | 502.6    |
|       | 56.9  | A0QQU5     | MSMEG_0880                | 84.0 | TIAYDEEAR                        | Carbamyl@N-term; Ala->Val@8                                            |                    | 0.05  | 1137.58 | 569.80   | 1137.53  | 569.77    | 2       | 3.220.9  |
|       | 56.9  | A0QQU5     | MSMEG_0880                | 75.0 | TDDVAGDGT TTTATVLAQALVR          | iTRAQ4plex@N-term; Asp->Val@2                                          |                    | -0.07 | 2202.13 | 735.05   | 2202.20  | 735.07    | 3       |          |
| 21    | 56.5  | A0QVZ3     | MSMEG_2750                | 99.0 | DGLLHVAGDR                       | iTRAQ4plex@N-term                                                      |                    | 0.00  | 1195.64 | 399.55   | 1195.64  | 399.55    | 3       | 144.7    |
|       | 56.5  | A0QVZ3     | MSMEG_2750                | 99.0 | EHVMS EEVER                      | iTRAQ4plex@N-term                                                      | cleaved W-E@N-term | 0.03  | 1387.68 | 463.57   | 1387.65  | 463.56    | 3       | 441.6    |
|       | 56.5  | A0QVZ3     | MSMEG_2750                | 99.0 | LDQSGPTV SQT VSR                 | iTRAQ4plex@N-term                                                      |                    | 0.04  | 1617.89 | 809.95   | 1617.84  | 809.93    | 2       | 377.0    |
|       | 56.5  | A0QVZ3     | MSMEG_2750                | 99.0 | LTEL P VGM P VAVV R              | iTRAQ4plex@N-term                                                      |                    | 0.01  | 1723.03 | 862.52   | 1723.02  | 862.52    | 2       | 2.109.4  |
|       | 56.5  | A0QVZ3     | MSMEG_2750                | 99.0 | MNDLVD TTEMYLR                   | iTRAQ4plex@N-term                                                      |                    | 0.03  | 1743.86 | 872.94   | 1743.83  | 872.92    | 2       | 1.904.5  |
|       | 56.5  | A0QVZ3     | MSMEG_2750                | 99.0 | QLTEHVQGD TDLIGR                 | iTRAQ4plex@N-term                                                      |                    | 0.04  | 1824.99 | 609.34   | 1824.95  | 609.32    | 3       | 1.004.0  |
|       | 56.5  | A0QVZ3     | MSMEG_2750                | 99.0 | WEHVMS EEVER                     | iTRAQ4plex@N-term                                                      |                    | 0.02  | 1573.75 | 525.59   | 1573.73  | 525.58    | 3       | 301.6    |
|       | 56.5  | A0QVZ3     | MSMEG_2750                | 99.0 | LDQSGPTV SQT VSR                 | iTRAQ4plex@N-term                                                      |                    | 0.02  | 1617.86 | 809.94   | 1617.84  | 809.93    | 2       | 680.9    |
|       | 56.5  | A0QVZ3     | MSMEG_2750                | 99.0 | MNDLVD TTEMYLR                   | iTRAQ4plex@N-term; Dimethyl(R)@13                                      |                    | -0.01 | 1771.85 | 886.93   | 1771.86  | 886.94    | 2       | 826.2    |
|       | 56.5  | A0QVZ3     | MSMEG_2750                | 99.0 | WEHVMS EEVER                     | iTRAQ4plex@N-term; Dioxidation(W)@1                                    |                    | 0.03  | 1605.75 | 536.26   | 1605.72  | 536.25    | 3       | 663.0    |
|       | 56.5  | A0QVZ3     | MSMEG_2750                | 99.0 | WEHVMS EEVER                     | iTRAQ4plex@N-term; Dimethyl(R)@11                                      |                    | -0.01 | 1601.75 | 534.92   | 1601.76  | 534.93    | 3       | 389.6    |
|       | 56.5  | A0QVZ3     | MSMEG_2750                | 98.0 | EAGVVPNAR                        | iTRAQ4plex@N-term; Deamidated(N)@7                                     |                    | 0.01  | 1056.58 | 529.30   | 1056.57  | 529.29    | 2       | 243.3    |
|       | 56.5  | A0QVZ3     | MSMEG_2750                | 97.0 | EAGVVPNAR                        | iTRAQ4plex@N-term                                                      |                    | 0.02  | 1055.60 | 528.81   | 1055.58  | 528.80    | 2       | 428.5    |
|       | 56.5  | A0QVZ3     | MSMEG_2750                | 94.0 | LTEL P VGM P VAVV R              | iTRAQ4plex@N-term; Dimethyl(R)@15                                      |                    | -0.03 | 1751.02 | 584.68   | 1751.05  | 584.69    | 3       | 26.1     |
|       | 56.5  | A0QVZ3     | MSMEG_2750                | 92.0 | DGLLHVAGDR                       | No iTRAQ4plex@N-term; Gly->Pro@2                                       |                    | 0.02  | 1091.59 | 546.80   | 1091.57  | 546.79    | 2       | 662.6    |
| 22    | 56.4  | A0R452     | MSMEG_5707                | 99.0 | MSLTALAR                         | iTRAQ4plex@N-term                                                      |                    | -0.02 | 1005.56 | 503.79   | 1005.58  | 503.80    | 2       | 4.337.2  |
|       | 56.4  | A0R452     | MSMEG_5707                | 81.0 | MSLTALAR                         | iTRAQ4plex@N-term; Ala->Val@7                                          |                    | -0.03 | 1033.58 | 517.80   | 1033.61  | 517.81    | 2       | 549.5    |
|       | 56.4  | A0R452     | MSMEG_5707                | 76   | VKLANSEASWEGSPG DLLV IPR         | iTRAQ4plex@N-term; User modH on Lys(K)@2; iTRAQ4plex(S)@6; Glu->Gln@11 | missed K-L@2       | -0.01 | 2867.54 | 717.89   | 2867.56  | 717.89    | 4       | 164.47   |
| 23    | 55.3  | A0QSX3     | MSMEG_1634                | 99.0 | ADIVLSGLR                        | iTRAQ4plex@N-term                                                      |                    | 0.00  | 1086.65 | 544.33   | 1086.65  | 544.33    | 2       | 3.395.8  |
|       | 55.3  | A0QSX3     | MSMEG_1634                | 99.0 | ETIAALGGLPGADHGEHEGR             | iTRAQ4plex@N-term                                                      |                    | 0.00  | 2130.06 | 533.52   | 2130.06  | 533.52    | 4       | 506.7    |
|       | 55.3  | A0QSX3     | MSMEG_1634                | 99.0 | LSAE E VANGA GLR PGLLDELEAGATPTI | iTRAQ4plex@N-term; Deamidated(N)@8                                     |                    | -0.02 | 3452.69 | 864.18   | 3452.70  | 864.18    | 4       | 123.5    |
|       | 55.3  | A0QSX3     | MSMEG_1634                | 99.0 | SALTEAASAQR                      | iTRAQ4plex@N-term                                                      | cleaved R-P@C-term | 0.04  | 1247.69 | 624.85   | 1247.66  | 624.84    | 2       | 3.914.7  |
|       | 55.3  | A0QSX3     | MSMEG_1634                | 99.0 | SALTEAASAQRPSPAVAALSGVR          | iTRAQ4plex@N-term                                                      |                    | -0.07 | 2424.25 | 809.09   | 2424.32  | 809.11    | 3       | 642.5    |
|       | 55.3  | A0QSX3     | MSMEG_1634                | 99.0 | YDSLMAHAAAAPGSSSLGQQIYVTR        | iTRAQ4plex@N-term                                                      |                    | -0.05 | 2650.28 | 884.43   | 2650.33  | 884.45    | 3       | 363.5    |
|       | 55.3  | A0QSX3     | MSMEG_1634                | 99.0 | ADIVLSGLR                        | iTRAQ4plex@N-term                                                      |                    | -0.01 | 1086.64 | 544.33   | 1086.65  | 544.33    | 2       | 1.184.0  |
|       | 55.3  | A0QSX3     | MSMEG_1634                | 99.0 | LSAE E VANGA GLR PGLLDELEAGATPTI | iTRAQ4plex@N-term                                                      |                    | 0.01  | 3451.73 | 863.94   | 3451.72  | 863.94    | 4       | 346.8    |
|       | 55.3  | A0QSX3     | MSMEG_1634                | 99.0 | LSAE E VANGA GLR PGLLDELEAGATPTI | iTRAQ4plex@N-term                                                      |                    | 0.02  | 3451.74 | 863.94   | 3451.72  | 863.94    | 4       | 597.8    |
|       | 55.3  | A0QSX3     | MSMEG_1634                | 99.0 | LSAE E VANGA GLR PGLLDELEAGATPTI | iTRAQ4plex@N-term; Deamidated(N)@8; Ala->Val@32                        |                    | -0.01 | 3480.72 | 871.19   | 3480.73  | 871.19    | 4       | 731.1    |
|       | 55.3  | A0QSX3     | MSMEG_1634                | 77.0 | ADIVLSGLR                        | iTRAQ4plex@N-term; Ser->Asp@6                                          |                    | 0.00  | 1114.65 | 558.33   | 1114.65  | 558.33    | 2       | 1.180.0  |
| 24    | 53.0  | A0RSR7     | MSMEG_6286                | 99.0 | DAGIAVTEAGSAFPYR                 | iTRAQ4plex@N-term                                                      |                    | -0.05 | 1767.84 | 590.29   | 1767.89  | 590.30    | 3       | 138.1    |
|       | 53.0  | A0RSR7     | MSMEG_6286                | 99.0 | DLLLAQHELQQR                     | iTRAQ4plex@N-term                                                      |                    | 0.02  | 1608.86 | 537.29   | 1608.83  | 537.29    | 3       | 873.8    |
|       | 53.0  | A0RSR7     | MSMEG_6286                | 99.0 | FALVAEILED R                     | iTRAQ4plex@N-term; Dimethyl(R)@11                                      |                    | 0.02  | 1446.84 | 724.43   | 1446.82  | 724.42    | 2       | 1.535.9  |
|       | 53.0  | A0RSR7     | MSMEG_6286                | 99.0 | FGDADGVR                         | iTRAQ4plex@N-term                                                      | cleaved F-F@N-term | 0.03  | 979.51  | 490.76   | 979.48   | 490.75    | 2       | 2.576.9  |
|       | 53.0  | A0RSR7     | MSMEG_6286                | 99.0 | GKPSPEQLDLSNGLLSLPGDGADAYR       | iTRAQ4plex@N-term; Lys->Gln@2                                          |                    | 0.04  | 2813.43 | 938.82   | 2813.40  | 938.81    | 3       | 36.8     |

Supplement Table 1A

| Index | % Cov | Uniprot ID | Gene locus<br>(M. smegmatis) | Conf | Peptide Sequence              | Modifications                                                  | Cleavages                                | ΔMass | Prec MW | Prec m/z | Calc. MW | Calc. m/z | Theor z | Area 115 |
|-------|-------|------------|------------------------------|------|-------------------------------|----------------------------------------------------------------|------------------------------------------|-------|---------|----------|----------|-----------|---------|----------|
|       | 53.0  | A0R5R7     | MSMEG_6286                   | 99.0 | IAPTFPSLPDVR                  | ITRAQ4plex@N-term                                              |                                          | 0.02  | 1455.85 | 728.93   | 1455.82  | 728.92    | 2       | 1.870.2  |
|       | 53.0  | A0R5R7     | MSMEG_6286                   | 99.0 | ITFAGAGVSFLGASADNIWYLYK       | ITRAQ4plex@N-term; Lys->Gln@23                                 |                                          | 0.04  | 2515.32 | 839.45   | 2515.29  | 839.44    | 3       | 78.3     |
|       | 53.0  | A0R5R7     | MSMEG_6286                   | 99.0 | DDLQAHELQQR                   | ITRAQ4plex@N-term; Dimethyl(R)@12                              |                                          | 0.01  | 1636.88 | 546.63   | 1636.87  | 546.63    | 3       | 650.1    |
|       | 53.0  | A0R5R7     | MSMEG_6286                   | 99.0 | FALVAEILEDK                   | ITRAQ4plex@N-term                                              |                                          | 0.01  | 1418.80 | 710.41   | 1418.79  | 710.40    | 2       | 1.178.4  |
|       | 53.0  | A0R5R7     | MSMEG_6286                   | 99.0 | NYGGVQGLPELKR                 | ITRAQ4plex@N-term; Dimethyl(R)@12                              |                                          | 0.01  | 1473.82 | 737.92   | 1473.81  | 737.91    | 2       | 988.0    |
|       | 53.0  | A0R5R7     | MSMEG_6286                   | 97.0 | NYAELQAK                      | ITRAQ4plex@N-term; Lys->Gln@8                                  |                                          | 0.05  | 1079.59 | 540.80   | 1079.54  | 540.78    | 2       | 895.8    |
|       | 53.0  | A0R5R7     | MSMEG_6286                   | 92.0 | PSLPDVR                       | No ITRAQ4plex@N-term                                           | cleaved F-P@N-term                       | -0.03 | 782.40  | 392.21   | 782.43   | 392.22    | 2       |          |
|       | 53.0  | A0R5R7     | MSMEG_6286                   | 88.0 | FGDADGVR                      | No ITRAQ4plex@N-term                                           | cleaved F-F@N-term                       | 0.02  | 835.40  | 418.71   | 835.38   | 418.70    | 2       |          |
|       | 53.0  | A0R5R7     | MSMEG_6286                   | 78.0 | GGYFVSLDVWPGTAK               | ITRAQ4plex@N-term; ITRAQ4plex(T)@13; Lys->Gln@15               |                                          | 0.00  | 1883.96 | 629.00   | 1883.97  | 629.00    | 3       | 213.6    |
| 25    | 51.0  | A0QZ83     | MSMEG_3932                   | 99.0 | AEPVPGIDPAKDIDITVR            | ITRAQ4plex@N-term; Lys->Gln@10; ITRAQ4plex(T)@15               |                                          | 0.02  | 2096.16 | 699.73   | 2096.14  | 699.72    | 3       | 412.6    |
|       | 51.0  | A0QZ83     | MSMEG_3932                   | 99.0 | SLFPFMSDFAGLPSWASIR           | ITRAQ4plex@N-term                                              | cleaved R-P@C-term                       | 0.03  | 2401.22 | 801.41   | 2401.19  | 801.40    | 3       | 85.7     |
| 26    | 50.7  | A0QWX9     | MSMEG_3102                   | 99.0 | EYEASDGVDR                    | ITRAQ4plex@N-term                                              |                                          | 0.01  | 1340.61 | 671.31   | 1340.60  | 671.31    | 2       | 290.1    |
|       | 50.7  | A0QWX9     | MSMEG_3102                   | 99.0 | GTAYDAQVNELAAR                | ITRAQ4plex@N-term                                              |                                          | 0.04  | 1621.86 | 811.94   | 1621.82  | 811.92    | 2       | 4.005.9  |
|       | 50.7  | A0QWX9     | MSMEG_3102                   | 99.0 | IGSDEALALR                    | ITRAQ4plex@N-term                                              |                                          | 0.02  | 1187.68 | 594.85   | 1187.66  | 594.84    | 2       | 1.474.4  |
|       | 50.7  | A0QWX9     | MSMEG_3102                   | 99.0 | LAYAAYEEVFGSDR                | ITRAQ4plex@N-term                                              |                                          | 0.00  | 1733.84 | 867.93   | 1733.84  | 867.93    | 2       | 2.917.6  |
|       | 50.7  | A0QWX9     | MSMEG_3102                   | 99.0 | LQTGNLTELINTR                 | ITRAQ4plex@N-term                                              |                                          | 0.02  | 1615.92 | 808.97   | 1615.90  | 808.96    | 2       | 3.786.5  |
|       | 50.7  | A0QWX9     | MSMEG_3102                   | 99.0 | LVMDDAYLEGLEK                 | ITRAQ4plex@N-term; Lys->Gln@12                                 |                                          | 0.02  | 1523.79 | 762.90   | 1523.77  | 762.89    | 2       | 57.6     |
|       | 50.7  | A0QWX9     | MSMEG_3102                   | 99.0 | SVVGVTTNPSIFQAALSK            | ITRAQ4plex@N-term; ITRAQ4plex(S)@17; Lys->Gln@18               |                                          | 0.03  | 2106.18 | 703.07   | 2106.16  | 703.06    | 3       | 139.9    |
|       | 50.7  | A0QWX9     | MSMEG_3102                   | 99.0 | SWQELLDATQGGQLDAAK            | ITRAQ4plex@N-term; Lys->Arg@17                                 |                                          | 0.00  | 2045.03 | 682.68   | 2045.03  | 682.68    | 3       | 21.7     |
|       | 50.7  | A0QWX9     | MSMEG_3102                   | 99.0 | TVTDDVR                       | ITRAQ4plex@N-term                                              |                                          | 0.01  | 1049.56 | 525.79   | 1049.55  | 525.78    | 2       | 140.0    |
|       | 50.7  | A0QWX9     | MSMEG_3102                   | 99.0 | EYEASDGVDR                    | ITRAQ4plex@N-term                                              |                                          | 0.01  | 1340.61 | 671.31   | 1340.60  | 671.31    | 2       | 178.8    |
|       | 50.7  | A0QWX9     | MSMEG_3102                   | 99.0 | GADVDTAIR                     | ITRAQ4plex@N-term                                              |                                          | 0.02  | 1060.59 | 531.30   | 1060.56  | 531.29    | 2       | 6.606.9  |
|       | 50.7  | A0QWX9     | MSMEG_3102                   | 99.0 | LQTGNLTELINTR                 | ITRAQ4plex@N-term; Dimethyl(R)@13                              |                                          | 0.01  | 1643.95 | 822.98   | 1643.93  | 822.97    | 2       | 831.3    |
|       | 50.7  | A0QWX9     | MSMEG_3102                   | 99.0 | SWQELLDATQGGQLDAAK            | ITRAQ4plex@N-term; Lys->Gln@17                                 |                                          | 0.04  | 2017.03 | 673.35   | 2016.99  | 673.34    | 3       | 206.9    |
|       | 50.7  | A0QWX9     | MSMEG_3102                   | 98.0 | TVTDDVR                       | ITRAQ4plex@N-term                                              |                                          | 0.01  | 1049.56 | 525.79   | 1049.55  | 525.78    | 2       | 41.2     |
|       | 50.7  | A0QWX9     | MSMEG_3102                   | 96.0 | GADVDTAIR                     | ITRAQ4plex@N-term                                              |                                          | 0.01  | 1060.58 | 531.30   | 1060.56  | 531.29    | 2       | 161.4    |
|       | 50.7  | A0QWX9     | MSMEG_3102                   | 94.0 | TLEAVADHGEITGNTIAGTAASSQETFDK | ITRAQ4plex@N-term; ITRAQ4plex(T)@26; Lys->Gln@29               |                                          | -0.01 | 3221.55 | 806.39   | 3221.56  | 806.40    | 4       | 94.2     |
|       | 50.7  | A0QWX9     | MSMEG_3102                   | 93.0 | AGVANAR                       | ITRAQ4plex@N-term                                              |                                          | 0.00  | 801.45  | 401.73   | 801.46   | 401.74    | 2       | 67.2     |
|       | 50.7  | A0QWX9     | MSMEG_3102                   | 91.0 | LEKIGSDEALALR                 | ITRAQ4plex@N-term; User modH on Lys(K)@3; ITRAQ4plex(S)@6      | missed K-I@3                             | -0.04 | 1945.06 | 649.36   | 1945.10  | 649.37    | 3       | 258.8    |
|       | 50.7  | A0QWX9     | MSMEG_3102                   | 91.0 | GADVDTAIR                     | ITRAQ4plex@N-term; Dimethyl(R)@9                               |                                          | 0.01  | 1088.61 | 545.31   | 1088.59  | 545.30    | 2       | 2.596.2  |
| 27    | 50.5  | A0QSD0     | MSMEG_1435                   | 99.0 | AYDHEAIDASAR                  | ITRAQ4plex@N-term                                              |                                          | 0.02  | 1461.72 | 488.25   | 1461.70  | 488.24    | 3       | 768.6    |
|       | 50.5  | A0QSD0     | MSMEG_1435                   | 99.0 | LIDILDPTPK                    | ITRAQ4plex@N-term; Lys->Gln@10                                 |                                          | 0.02  | 1267.73 | 634.87   | 1267.71  | 634.86    | 2       | 1.343.6  |
|       | 50.5  | A0QSD0     | MSMEG_1435                   | 99.0 | TGASVVGVPVLPTEK               | ITRAQ4plex@N-term; ITRAQ4plex(T)@13; Lys->Gln@15               |                                          | 0.05  | 1739.02 | 580.68   | 1738.97  | 580.66    | 3       | 604.6    |
|       | 50.5  | A0QSD0     | MSMEG_1435                   | 99.0 | TVDALMR                       | ITRAQ4plex@N-term                                              |                                          | 0.00  | 948.52  | 475.27   | 948.52   | 475.27    | 2       | 80.0     |
|       | 50.5  | A0QSD0     | MSMEG_1435                   | 99.0 | AYDHEAIDASAR                  | ITRAQ4plex@N-term; Ala->Val@11                                 |                                          | 0.02  | 1489.74 | 497.59   | 1489.73  | 497.58    | 3       | 239.7    |
|       | 50.5  | A0QSD0     | MSMEG_1435                   | 99.0 | AYDHEAIDASAR                  | No ITRAQ4plex@N-term                                           |                                          | 0.00  | 1317.60 | 440.21   | 1317.59  | 440.21    | 3       | 26.1     |
|       | 50.5  | A0QSD0     | MSMEG_1435                   | 99.0 | AYDHEAIDASAR                  | ITRAQ4plex@N-term                                              |                                          | 0.06  | 1461.76 | 488.26   | 1461.70  | 488.24    | 3       | 1.893.7  |
|       | 50.5  | A0QSD0     | MSMEG_1435                   | 96.0 | DHEAIDASAR                    | ITRAQ4plex@N-term                                              | cleaved Y-D@N-term                       | 0.04  | 1227.63 | 410.22   | 1227.60  | 410.21    | 3       | 70.3     |
| 28    | 49.9  | A0QWT3     | MSMEG_3055                   | 99.0 | AIGEVFDLR                     | ITRAQ4plex@N-term                                              | cleaved R-P@C-term                       | -0.01 | 1162.63 | 582.32   | 1162.65  | 582.33    | 2       | 491.0    |
|       | 49.9  | A0QWT3     | MSMEG_3055                   | 99.0 | AIGEVFDLRPAIVR                | ITRAQ4plex@N-term                                              |                                          | -0.04 | 1769.99 | 591.00   | 1770.03  | 591.02    | 3       | 394.2    |
|       | 49.9  | A0QWT3     | MSMEG_3055                   | 99.0 | DIREKVVNTVLADLGHETLDTSDYR     | ITRAQ4plex@N-term; Lys->Met@5                                  | cleaved P-D@N-term; missed R-E@3; missed | 0.06  | 3005.54 | 752.39   | 3005.49  | 752.38    | 4       | 667.3    |
|       | 49.9  | A0QWT3     | MSMEG_3055                   | 99.0 | DLDLLRPIYAPTAAYGHFGR          | ITRAQ4plex@N-term                                              |                                          | 0.06  | 2389.33 | 598.34   | 2389.27  | 598.32    | 4       | 322.7    |
|       | 49.9  | A0QWT3     | MSMEG_3055                   | 99.0 | FVLGGPMGDAGLTGR               | ITRAQ4plex@N-term                                              |                                          | 0.01  | 1590.84 | 796.43   | 1590.83  | 796.42    | 2       | 931.8    |
|       | 49.9  | A0QWT3     | MSMEG_3055                   | 99.0 | ICDAISDSVLDALLEQDPK           | ITRAQ4plex@N-term; Pyridylethyl(C)@2; Lys->Arg@19              |                                          | 0.03  | 2321.20 | 774.74   | 2321.17  | 774.73    | 3       | 60.9     |
|       | 49.9  | A0QWT3     | MSMEG_3055                   | 99.0 | IIVDTYGGWAR                   | ITRAQ4plex@N-term                                              |                                          | 0.01  | 1393.76 | 697.89   | 1393.75  | 697.88    | 2       | 2.350.2  |
|       | 49.9  | A0QWT3     | MSMEG_3055                   | 99.0 | LFTSESVTEGHPDK                | ITRAQ4plex@N-term; Lys->Gln@14                                 |                                          | 0.05  | 1689.85 | 564.29   | 1689.80  | 564.27    | 3       | 442.6    |
|       | 49.9  | A0QWT3     | MSMEG_3055                   | 99.0 | NVVAAGLAER                    | ITRAQ4plex@N-term                                              |                                          | -0.01 | 1142.64 | 572.33   | 1142.65  | 572.33    | 2       | 3.801.6  |
|       | 49.9  | A0QWT3     | MSMEG_3055                   | 99.0 | TQVTIQYDGTTPVR                | ITRAQ4plex@N-term                                              |                                          | 0.01  | 1721.92 | 861.97   | 1721.91  | 861.96    | 2       | 302.9    |
|       | 49.9  | A0QWT3     | MSMEG_3055                   | 99.0 | VVNTVLADLGHETLDTSDYR          | ITRAQ4plex@N-term                                              |                                          | -0.04 | 2361.16 | 788.06   | 2361.19  | 788.07    | 3       | 649.5    |
|       | 49.9  | A0QWT3     | MSMEG_3055                   | 99.0 | AIGEVFDLRPAIVR                | ITRAQ4plex@N-term                                              |                                          | -0.02 | 1770.01 | 591.01   | 1770.03  | 591.02    | 3       | 115.9    |
|       | 49.9  | A0QWT3     | MSMEG_3055                   | 99.0 | AIGEVFDLRPAIVR                | ITRAQ4plex@N-term; Dimethyl(R)@15                              |                                          | 0.02  | 1798.07 | 600.37   | 1798.06  | 600.36    | 3       | 613.9    |
|       | 49.9  | A0QWT3     | MSMEG_3055                   | 99.0 | FVLGGPMGDAGLTGR               | ITRAQ4plex@N-term                                              |                                          | 0.01  | 1590.84 | 796.43   | 1590.83  | 796.42    | 2       | 1.767.0  |
|       | 49.9  | A0QWT3     | MSMEG_3055                   | 99.0 | ICDAISDSVLDALLEQDPK           | ITRAQ4plex@N-term; Pyridylethyl(C)@2; Lys->Gln@19              |                                          | 0.05  | 2293.18 | 765.40   | 2293.13  | 765.38    | 3       | 80.2     |
|       | 49.9  | A0QWT3     | MSMEG_3055                   | 99.0 | ICDAISDSVLDALLEQDPK           | ITRAQ4plex@N-term; Pyridylethyl(C)@2; Asp->Asn@11; Lys->Gln@19 |                                          | 0.04  | 2292.18 | 765.07   | 2292.14  | 765.05    | 3       | 18.4     |
|       | 49.9  | A0QWT3     | MSMEG_3055                   | 99.0 | VVNTVLADLGHETLDTSDYR          | ITRAQ4plex@N-term                                              |                                          | -0.03 | 2361.16 | 788.06   | 2361.19  | 788.07    | 3       | 320.8    |
|       | 49.9  | A0QWT3     | MSMEG_3055                   | 99.0 | VVNTVLADLGHETLDTSDYR          | ITRAQ4plex@N-term; Dimethyl(R)@20                              |                                          | -0.04 | 2389.19 | 797.40   | 2389.22  | 797.42    | 3       | 160.0    |
|       | 49.9  | A0QWT3     | MSMEG_3055                   | 91.0 | NVVAAGLAER                    | ITRAQ4plex@N-term                                              |                                          | 0.03  | 1142.69 | 572.35   | 1142.65  | 572.33    | 2       | 2.755.8  |

Supplement Table 1A

| Index | % Cov  | Uniprot ID | Gene locus (M. smegmatis) | Conf                        | Peptide Sequence                                              | Modifications                                                            | Cleavages          | ΔMass         | Prec MW | Prec m/z | Calc. MW | Calc. m/z | Theor z | Area 115 |         |
|-------|--------|------------|---------------------------|-----------------------------|---------------------------------------------------------------|--------------------------------------------------------------------------|--------------------|---------------|---------|----------|----------|-----------|---------|----------|---------|
| 49.9  | A0QW3T | MSMEG_3055 | 96.0                      | SAAYAMR                     | iTRAQ4plex@N-term                                             |                                                                          |                    | 0.02          | 912.48  | 457.25   | 912.46   | 457.24    | 2       | 285.6    |         |
| 49.9  | A0QW3T | MSMEG_3055 | 96.0                      | ICDAISDSVLDALLEQDPK         | No iTRAQ4plex@N-term; Pyridylethyl(C)@2; Lys->Gln@19          |                                                                          |                    | 0.01          | 2149.03 | 717.35   | 2149.02  | 717.35    | 3       | 138.8    |         |
| 49.9  | A0QW3T | MSMEG_3055 | 82.0                      | TDIELPWEQTNK                | iTRAQ4plex@N-term; iTRAQ4plex(T)@10; Lys->Gln@12              |                                                                          |                    | 0.00          | 1760.88 | 587.97   | 1760.88  | 587.97    | 3       | 481.2    |         |
| 29    | 49.4   | A0QXA3     | MSMEG_3227                | 99.0                        | AASDVTGHAVGIMADLQGPK                                          | iTRAQ4plex@N-term; Lys->Gln@20                                           |                    |               | 0.02    | 2081.05  | 694.69   | 2081.03   | 694.69  | 3        | 127.0   |
| 49.4  | A0QXA3 | MSMEG_3227 | 99.0                      | ALVAFTQSGDTRV               | iTRAQ4plex@N-term                                             |                                                                          |                    | 0.03          | 1507.84 | 754.93   | 1507.81  | 754.91    | 2       | 1,605.0  |         |
| 49.4  | A0QXA3 | MSMEG_3227 | 99.0                      | ALVEAGMDVAR                 | iTRAQ4plex@N-term                                             |                                                                          |                    | 0.01          | 1274.69 | 638.35   | 1274.68  | 638.35    | 2       | 2,164.5  |         |
| 49.4  | A0QXA3 | MSMEG_3227 | 99.0                      | GDLGVELPLEEVPLVQKR          | iTRAQ4plex@N-term; Gln->Met@16; Lys->Leu@17                   |                                                                          | missed K-R@17      | -0.01         | 2122.17 | 708.40   | 2122.18  | 708.40    | 3       | 581.1    |         |
| 49.4  | A0QXA3 | MSMEG_3227 | 99.0                      | GVISYAAR                    | iTRAQ4plex@N-term                                             |                                                                          |                    | 0.00          | 979.55  | 490.78   | 979.56   | 490.79    | 2       | 2,184.9  |         |
| 49.4  | A0QXA3 | MSMEG_3227 | 99.0                      | IIQAVEDNSVVPLTHVPR          | iTRAQ4plex@N-term                                             |                                                                          |                    | -0.07         | 2326.25 | 776.42   | 2326.31  | 776.44    | 3       | 47.8     |         |
| 49.4  | A0QXA3 | MSMEG_3227 | 99.0                      | IVCTLGPATSTDETVR            | iTRAQ4plex@N-term; Pyridylethyl(C)@3                          |                                                                          |                    | 0.01          | 1911.00 | 638.01   | 1910.99  | 638.00    | 3       | 884.4    |         |
| 49.4  | A0QXA3 | MSMEG_3227 | 99.0                      | LHTPLPLVAFALPEVR            | iTRAQ4plex@N-term                                             |                                                                          |                    | 0.00          | 2017.18 | 673.40   | 2017.18  | 673.40    | 3       | 103.0    |         |
| 49.4  | A0QXA3 | MSMEG_3227 | 99.0                      | QLAQDAAR                    | iTRAQ4plex@N-term                                             |                                                                          |                    | 0.02          | 1015.58 | 508.80   | 1015.55  | 508.78    | 2       | 139.4    |         |
| 49.4  | A0QXA3 | MSMEG_3227 | 99.0                      | SPADIELVHEVMDR              | iTRAQ4plex@N-term                                             |                                                                          |                    | -0.08         | 1753.80 | 585.61   | 1753.88  | 585.63    | 3       | 708.2    |         |
| 49.4  | A0QXA3 | MSMEG_3227 | 99.0                      | GDLGVELPLEEVPLVQKR          | iTRAQ4plex@N-term; Gln->Pro@16; Lys->Phe@17                   |                                                                          | missed K-R@17      | -0.03         | 2122.15 | 708.39   | 2122.18  | 708.40    | 3       | 72.7     |         |
| 49.4  | A0QXA3 | MSMEG_3227 | 98.0                      | AEASDVANAVLDGADAVMLSGETSVGK | iTRAQ4plex@N-term; Asp->Asn@15; iTRAQ4plex(S)@24; Lys->Gln@27 |                                                                          |                    | 0.06          | 2863.47 | 955.50   | 2863.41  | 955.48    | 3       | 501.8    |         |
| 30    | 48.9   | A0QZ47     | MSMEG_3895                | 99.0                        | LYAVELEHYEK                                                   | iTRAQ4plex@N-term; Lys->Gln@11                                           |                    |               | -0.01   | 1536.75  | 513.26   | 1536.76   | 513.26  | 3        | 872.4   |
| 48.9  | A0QZ47 | MSMEG_3895 | 99.0                      | LYSQVSDADSALK               | iTRAQ4plex@N-term; Ala->Gly@11; Lys->Arg@13                   |                                                                          |                    | 0.03          | 1553.81 | 777.91   | 1553.78  | 777.90    | 2       | 8,868.3  |         |
| 48.9  | A0QZ47 | MSMEG_3895 | 99.0                      | STQGNMIAGR                  | iTRAQ4plex@N-term                                             |                                                                          |                    | 0.02          | 1177.62 | 589.82   | 1177.60  | 589.81    | 2       | 192.7    |         |
| 48.9  | A0QZ47 | MSMEG_3895 | 99.0                      | VAVEALYDAADDDSATGGPDLVR     | iTRAQ4plex@N-term; Dimethyl(R)@23                             |                                                                          |                    | -0.02         | 2491.20 | 831.41   | 2491.22  | 831.41    | 3       | 165.8    |         |
| 48.9  | A0QZ47 | MSMEG_3895 | 99.0                      | YPGSVLIAGDR                 | iTRAQ4plex@N-term                                             |                                                                          |                    | 0.00          | 1260.70 | 631.36   | 1260.69  | 631.35    | 2       | 3,128.2  |         |
| 48.9  | A0QZ47 | MSMEG_3895 | 99.0                      | LYAVELEHYEK                 | iTRAQ4plex@N-term; Lys->Arg@11                                |                                                                          |                    | 0.02          | 1564.82 | 522.61   | 1564.80  | 522.61    | 3       | 570.1    |         |
| 48.9  | A0QZ47 | MSMEG_3895 | 99.0                      | STQGNMIAGR                  | iTRAQ4plex@N-term; Oxidation(R)@10                            |                                                                          |                    | 0.02          | 1193.62 | 597.82   | 1193.59  | 597.80    | 2       | 359.9    |         |
| 48.9  | A0QZ47 | MSMEG_3895 | 99.0                      | VAVEALYDAADDDSATGGPDLVR     | iTRAQ4plex@N-term; Oxidation(D)@11; Asp->Asn@12               |                                                                          |                    | 0.03          | 2478.23 | 827.08   | 2478.20  | 827.07    | 3       | 70.5     |         |
| 48.9  | A0QZ47 | MSMEG_3895 | 99.0                      | VAVEALYDAADDDSATGGPDLVR     | iTRAQ4plex@N-term; Dimethyl(R)@23                             |                                                                          |                    | -0.02         | 2491.20 | 831.41   | 2491.22  | 831.41    | 3       |          |         |
| 48.9  | A0QZ47 | MSMEG_3895 | 99.0                      | VAVEALYDAADDDSATGGPDLVR     | iTRAQ4plex@N-term; AMP(Y)@7; Asp->Leu@8                       |                                                                          |                    | 0.04          | 2790.33 | 698.59   | 2790.30  | 698.58    | 4       | 197.3    |         |
| 48.9  | A0QZ47 | MSMEG_3895 | 98.0                      | VAVEALYDAADDDSATGGPDLVR     | iTRAQ4plex@N-term                                             |                                                                          |                    | -0.03         | 2463.16 | 822.06   | 2463.19  | 822.07    | 3       |          |         |
| 48.9  | A0QZ47 | MSMEG_3895 | 97.0                      | STQGNMIAGR                  | iTRAQ4plex@N-term; Oxidation(R)@10                            |                                                                          |                    | 0.02          | 1193.62 | 597.82   | 1193.59  | 597.80    | 2       | 507.8    |         |
| 31    | 48.7   | A0QS97     | MSMEG_1399                | 99.0                        | IVYGALEQAR                                                    | iTRAQ4plex@N-term                                                        |                    |               | 0.02    | 1262.73  | 632.37   | 1262.71   | 632.36  | 2        | 1,438.2 |
| 48.7  | A0QS97 | MSMEG_1399 | 99.0                      | VGGATYQVPVEVRPDR            | iTRAQ4plex@N-term                                             |                                                                          |                    | -0.03         | 1885.98 | 629.67   | 1886.01  | 629.68    | 3       | 1,556.9  |         |
| 48.7  | A0QS97 | MSMEG_1399 | 96.0                      | STTLALR                     | iTRAQ4plex@N-term                                             |                                                                          |                    | 0.00          | 904.54  | 453.28   | 904.55   | 453.28    | 2       | 1,692.5  |         |
| 48.7  | A0QS97 | MSMEG_1399 | 88.0                      | RPLVNDPVYGSQVLTQLVNK        | iTRAQ4plex@N-term; Lys->Gln@20                                |                                                                          |                    | 0.07          | 2383.37 | 795.46   | 2383.30  | 795.44    | 3       | 27.2     |         |
| 48.7  | A0QS97 | MSMEG_1399 | 83.0                      | LANEILDASNGLGASVK           | iTRAQ4plex@N-term; iTRAQ4plex(S)@15; Lys->Gln@17              |                                                                          |                    | 0.02          | 1959.07 | 654.03   | 1959.05  | 654.02    | 3       | 70.5     |         |
| 32    | 46.9   | A0QSE0     | MSMEG_1445                | 99.0                        | AHDENGEAGIGDR                                                 | iTRAQ4plex@N-term                                                        |                    |               | 0.01    | 1483.68  | 495.57   | 1483.68   | 495.57  | 3        | 25.0    |
| 46.9  | A0QSE0 | MSMEG_1445 | 99.0                      | AHDENGEAGIGDR               | iTRAQ4plex@N-term; Deamidated(N)@5                            |                                                                          |                    | 0.02          | 1484.68 | 495.90   | 1484.66  | 495.89    | 3       | 84.7     |         |
| 46.9  | A0QSE0 | MSMEG_1445 | 92.0                      | VSLMETR                     | iTRAQ4plex@N-term                                             |                                                                          | cleaved R-P@C-term | 0.00          | 978.53  | 490.27   | 978.53   | 490.27    | 2       | 2,420.9  |         |
| 33    | 46.9   | A0QNF6     | MSMEG_0024                | 99.0                        | HTIFGEVVDDEESQKVVDIAIAPTDF                                    | iTRAQ4plex@N-term; Glu->Gln@11; iTRAQ4plex(S)@12; User modH on Lys(K)@14 |                    | missed K-V@14 | -0.07   | 3372.66  | 844.17   | 3372.73   | 844.19  | 4        | 50.0    |
| 46.9  | A0QNF6 | MSMEG_0024 | 99.0                      | DYSTENASGTSQPFYDGAVFHR      | iTRAQ4plex@N-term                                             |                                                                          |                    | 0.03          | 2578.18 | 860.40   | 2578.15  | 860.39    | 3       | 104.9    |         |
| 46.9  | A0QNF6 | MSMEG_0024 | 99.0                      | TVNNFVGLAQGTK               | iTRAQ4plex@N-term; Lys->Gln@13                                |                                                                          |                    | 0.05          | 1491.83 | 746.92   | 1491.78  | 746.90    | 2       | 687.2    |         |
| 46.9  | A0QNF6 | MSMEG_0024 | 99.0                      | VIDFMIQGGDPTGTGR            | iTRAQ4plex@N-term                                             |                                                                          |                    | -0.04         | 1863.89 | 622.30   | 1863.93  | 622.32    | 3       | 445.3    |         |
| 46.9  | A0QNF6 | MSMEG_0024 | 99.0                      | VVDIAIAPTDR                 | iTRAQ4plex@N-term                                             |                                                                          |                    | 0.00          | 1387.75 | 694.88   | 1387.74  | 694.88    | 2       | 5,214.4  |         |
| 46.9  | A0QNF6 | MSMEG_0024 | 99.0                      | TVNNFVGLAQGTK               | iTRAQ4plex@N-term; iTRAQ4plex(T)@12; Lys->Gln@13              |                                                                          |                    | 0.05          | 1635.94 | 546.32   | 1635.88  | 546.30    | 3       | 1,273.9  |         |
| 46.9  | A0QNF6 | MSMEG_0024 | 95.0                      | HTIFGEVVDDEESQKVVDIAIAPTDF  | iTRAQ4plex@N-term; iTRAQ4plex(S)@12; User modH on Lys(K)@14   |                                                                          | missed K-V@14      | -0.05         | 3373.66 | 844.42   | 3373.71  | 844.44    | 4       | 87.8     |         |
| 34    | 46.7   | A0QUZ0     | MSMEG_2388                | 99.0                        | GSVLVAGPDFGTGSSR                                              | iTRAQ4plex@N-term                                                        |                    |               | 0.00    | 1649.85  | 825.93   | 1649.85   | 825.93  | 2        | 215.2   |
| 46.7  | A0QUZ0 | MSMEG_2388 | 99.0                      | LLEGLDDIGLTLR               | iTRAQ4plex@N-term                                             |                                                                          |                    | 0.02          | 1570.92 | 786.47   | 1570.91  | 786.46    | 2       | 1,467.6  |         |
| 46.7  | A0QUZ0 | MSMEG_2388 | 99.0                      | MEAFTHHTGIGVPLR             | iTRAQ4plex@N-term                                             |                                                                          |                    | 0.00          | 1772.94 | 591.99   | 1772.94  | 591.99    | 3       | 147.0    |         |
| 46.7  | A0QUZ0 | MSMEG_2388 | 99.0                      | LLEGLDDIGLTLR               | iTRAQ4plex@N-term                                             |                                                                          |                    | -0.01         | 1570.90 | 786.45   | 1570.91  | 786.46    | 2       | 209.1    |         |
| 46.7  | A0QUZ0 | MSMEG_2388 | 75.0                      | FADIFR                      | iTRAQ4plex@N-term                                             |                                                                          |                    | -0.01         | 911.49  | 456.75   | 911.50   | 456.76    | 2       | 431.9    |         |
| 35    | 46.7   | A0R7F9     | MSMEG_6897                | 99.0                        | AEPATVSELDR                                                   | iTRAQ4plex@N-term                                                        |                    |               | 0.01    | 1330.69  | 666.35   | 1330.69   | 666.35  | 2        | 2,687.9 |
| 46.7  | A0R7F9 | MSMEG_6897 | 99.0                      | QLNLNESVLR                  | iTRAQ4plex@N-term                                             |                                                                          |                    | 0.00          | 1328.75 | 665.38   | 1328.75  | 665.38    | 2       | 273.8    |         |
| 46.7  | A0R7F9 | MSMEG_6897 | 99.0                      | TVAPSLTEFLNVIR              | iTRAQ4plex@N-term                                             |                                                                          |                    | 0.01          | 1702.98 | 852.50   | 1702.97  | 852.49    | 2       | 500.6    |         |
| 46.7  | A0R7F9 | MSMEG_6897 | 99.0                      | QLNLNESVLR                  | iTRAQ4plex@N-term                                             |                                                                          |                    | -0.01         | 1328.75 | 665.38   | 1328.75  | 665.38    | 2       | 2,800.9  |         |
| 36    | 45.5   | A0QSG1     | MSMEG_1467                | 99.0                        | LINGAINDLALITGQKPEVR                                          | iTRAQ4plex@N-term; Deamidated(N)@3; iTRAQ4plex(T)@13; Lys->Gln@16        |                    |               | 0.03    | 2423.39  | 808.80   | 2423.36   | 808.79  | 3        | 1,110.7 |
| 45.5  | A0QSG1 | MSMEG_1467 | 99.0                      | LINGAINDLALITGQKPEVRR       | iTRAQ4plex@N-term; Lys->Gly@16; Pro->Arg@17                   |                                                                          | missed R-R@20      | -0.01         | 2422.38 | 808.80   | 2422.39  | 808.80    | 4       | 71.5     |         |

Supplement Table 1A

| Index | % Cov | Uniprot ID | Gene locus<br>(M. smegmatis) | Conf | Peptide Sequence            | Modifications                                                             | Cleavages                                | ΔMass | Prec MW | Prec m/z | Calc. MW | Calc. m/z | Theor z | Area 115 |
|-------|-------|------------|------------------------------|------|-----------------------------|---------------------------------------------------------------------------|------------------------------------------|-------|---------|----------|----------|-----------|---------|----------|
|       | 45.5  | A0QSG1     | MSMEG_1467                   | 99.0 | VVVMGVGDAAR                 | iTRAQ4plex@N-term                                                         |                                          | -0.01 | 1330.70 | 666.36   | 1330.71  | 666.36    | 2       | 3.338.8  |
|       | 45.5  | A0QSG1     | MSMEG_1467                   | 99.0 | LINGAINDLALITGQKPEVR        | iTRAQ4plex@N-term; Deamidated(N)@3; iTRAQ4plex(T)@13; Lys->Gln@16         |                                          | 0.02  | 2423.39 | 606.85   | 2423.36  | 606.85    | 4       | 64.1     |
|       | 45.5  | A0QSG1     | MSMEG_1467                   | 99.0 | LINGAINDLALITGQKPEVR        | iTRAQ4plex@N-term; Deamidated(N)@3; iTRAQ4plex(T)@13; Lys->Gln@16         |                                          | 0.04  | 2423.40 | 606.86   | 2423.36  | 606.85    | 4       | 597.5    |
|       | 45.5  | A0QSG1     | MSMEG_1467                   | 99.0 | LINGAINDLALITGQKPEVR        | iTRAQ4plex@N-term; Deamidated(N)@3; iTRAQ4plex(T)@13; Lys->Gln@16         |                                          | 0.02  | 2423.38 | 606.85   | 2423.36  | 606.85    | 4       | 18.5     |
|       | 45.5  | A0QSG1     | MSMEG_1467                   | 99.0 | LINGAINDLALITGQKPEVR        | iTRAQ4plex@N-term; Deamidated(N)@3; Lys->Gln@16                           |                                          | 0.05  | 2279.31 | 760.78   | 2279.26  | 760.76    | 3       | 47.8     |
|       | 45.5  | A0QSG1     | MSMEG_1467                   | 98.0 | LISIALPR                    | iTRAQ4plex@N-term                                                         |                                          | -0.04 | 1025.63 | 513.82   | 1025.67  | 513.84    | 2       | 1.234.1  |
| 37    | 44.9  | A0R5R5     | MSMEG_6284                   | 99.0 | EQATWAQKAIQAQEGLTDLAEVR     | iTRAQ4plex@N-term; iTRAQ4plex(T)@4; User modH on Lys(K)@8; Dimethyl(R)@22 | missed K-A@8                             | -0.03 | 2986.56 | 747.65   | 2986.58  | 747.65    | 4       | 68.5     |
|       | 44.9  | A0R5R5     | MSMEG_6284                   | 99.0 | AIAQEGLTDLAEVR              | iTRAQ4plex@N-term                                                         |                                          | -0.03 | 1628.86 | 815.44   | 1628.89  | 815.45    | 2       | 773.0    |
|       | 44.9  | A0R5R5     | MSMEG_6284                   | 99.0 | AYVSGDLEPHGVHPGDPYPLLR      | iTRAQ4plex@N-term                                                         |                                          | -0.02 | 2532.27 | 634.07   | 2532.29  | 634.08    | 4       | 366.7    |
|       | 44.9  | A0R5R5     | MSMEG_6284                   | 99.0 | IITEAQDVGLVHEENLR           | iTRAQ4plex@N-term                                                         |                                          | -0.04 | 2321.20 | 774.74   | 2321.23  | 774.75    | 3       | 525.3    |
|       | 44.9  | A0R5R5     | MSMEG_6284                   | 99.0 | NLVEHWDEAVEEVGLPTAK         | iTRAQ4plex@N-term; iTRAQ4plex(T)@17; Lys->Gln@19                          |                                          | 0.02  | 2423.24 | 606.82   | 2423.22  | 606.81    | 4       | 19.6     |
|       | 44.9  | A0R5R5     | MSMEG_6284                   | 99.0 | SAPSAGGFIDR                 | iTRAQ4plex@N-term                                                         |                                          | 0.01  | 1220.64 | 611.33   | 1220.63  | 611.32    | 2       | 2.726.0  |
|       | 44.9  | A0R5R5     | MSMEG_6284                   | 99.0 | VWGLYMAGSR                  | iTRAQ4plex@N-term                                                         |                                          | -0.03 | 1282.63 | 642.32   | 1282.66  | 642.34    | 2       | 587.4    |
|       | 44.9  | A0R5R5     | MSMEG_6284                   | 99.0 | YVFPDGELTGSGR               | iTRAQ4plex@N-term                                                         |                                          | 0.00  | 1540.76 | 771.39   | 1540.76  | 771.39    | 2       | 2.590.6  |
|       | 44.9  | A0R5R5     | MSMEG_6284                   | 99.0 | IITEAQDVGLVHEENLR           | iTRAQ4plex@N-term                                                         |                                          | -0.03 | 2321.20 | 774.74   | 2321.23  | 774.75    | 3       | 162.8    |
|       | 44.9  | A0R5R5     | MSMEG_6284                   | 99.0 | IITEAQDVGLVHEENLR           | iTRAQ4plex@N-term; Glu->Arg@16; Deamidated(N)@17                          |                                          | 0.02  | 2349.29 | 784.11   | 2349.28  | 784.10    | 3       | 26.0     |
|       | 44.9  | A0R5R5     | MSMEG_6284                   | 98.0 | DGGLPLRPVWSA                | iTRAQ4plex@N-term                                                         |                                          | 0.01  | 1497.79 | 749.90   | 1497.79  | 749.90    | 2       | 312.0    |
|       | 44.9  | A0R5R5     | MSMEG_6284                   | 98.0 | GTTYLATAPGDLGLAR            | iTRAQ4plex@N-term                                                         |                                          | -0.03 | 1719.90 | 574.31   | 1719.93  | 574.32    | 3       | 27.2     |
|       | 44.9  | A0R5R5     | MSMEG_6284                   | 98.0 | TEAQDVGLVHEENLR             | iTRAQ4plex@N-term; Phospho(T)@1; Deamidated(Q)@4                          | cleaved I-T@N-term                       | 0.20  | 2176.22 | 726.41   | 2176.02  | 726.35    | 3       |          |
|       | 44.9  | A0R5R5     | MSMEG_6284                   | 92.0 | EQATWAQKAIQAQEGLTDLAEVR     | No iTRAQ4plex@N-term; Deamidated(Q)@2; User modH on Lys(K)@8              | missed K-A@8                             | -0.01 | 2671.32 | 1336.67  | 2671.33  | 1336.67   | 2       | 1.022.9  |
| 38    | 44.8  | A0QSG0     | MSMEG_1466                   | 99.0 | GASSGGIVTQEAPIHVSVMVVDSDGK  | iTRAQ4plex@N-term; Lys->Gln@27; iTRAQ4plex(T)@29                          |                                          | 0.10  | 3295.77 | 824.95   | 3295.67  | 824.93    | 4       | 251.3    |
|       | 44.8  | A0QSG0     | MSMEG_1466                   | 99.0 | VLVEGVNR                    | iTRAQ4plex@N-term                                                         |                                          | 0.01  | 1028.62 | 515.31   | 1028.61  | 515.31    | 2       | 3.155.6  |
|       | 44.8  | A0QSG0     | MSMEG_1466                   | 99.0 | GASSGGIVTQEAPIHVSVMVVDSDGK  | iTRAQ4plex@N-term; Lys->Gln@27                                            |                                          | 0.11  | 3151.68 | 788.93   | 3151.57  | 788.90    | 4       | 70.5     |
| 39    | 44.7  | A0R3B8     | MSMEG_5415                   | 99.0 | AAAESAGLPLFR                | iTRAQ4plex@N-term                                                         |                                          | 0.03  | 1345.77 | 673.89   | 1345.75  | 673.88    | 2       | 308.3    |
|       | 44.7  | A0R3B8     | MSMEG_5415                   | 99.0 | AAVPSGASTGEHEAVELR          | iTRAQ4plex@N-term                                                         |                                          | 0.03  | 1924.01 | 642.34   | 1923.98  | 642.33    | 3       | 1.378.0  |
|       | 44.7  | A0R3B8     | MSMEG_5415                   | 99.0 | GNPTVEVEVALTDGTFAR          | iTRAQ4plex@N-term                                                         |                                          | -0.01 | 2019.03 | 674.02   | 2019.04  | 674.02    | 3       | 10.9     |
|       | 44.7  | A0R3B8     | MSMEG_5415                   | 99.0 | QLVGGDDLFTVNPFR             | iTRAQ4plex@N-term                                                         |                                          | -0.02 | 1858.97 | 930.49   | 1858.99  | 930.50    | 2       | 1.969.5  |
|       | 44.7  | A0R3B8     | MSMEG_5415                   | 99.0 | VNIQITLETDLAVSLAHNSGYR      | iTRAQ4plex@N-term                                                         |                                          | -0.03 | 2602.31 | 868.45   | 2602.35  | 868.46    | 3       | 75.9     |
|       | 44.7  | A0R3B8     | MSMEG_5415                   | 99.0 | YAGDLAFPR                   | iTRAQ4plex@N-term                                                         |                                          | -0.01 | 1152.60 | 577.31   | 1152.60  | 577.31    | 2       | 1.154.2  |
|       | 44.7  | A0R3B8     | MSMEG_5415                   | 99.0 | AAAESAGLPLFR                | iTRAQ4plex@N-term                                                         |                                          | 0.02  | 1345.77 | 673.89   | 1345.75  | 673.88    | 2       | 572.7    |
|       | 44.7  | A0R3B8     | MSMEG_5415                   | 99.0 | YAGDLAFPR                   | iTRAQ4plex@N-term                                                         |                                          | -0.02 | 1152.59 | 577.30   | 1152.60  | 577.31    | 2       | 2.896.5  |
| 40    | 44.5  | A0R1Y7     | MSMEG_4920                   | 99.0 | AGEFDVIVAGGQESMSQAPHLKPSR   | iTRAQ4plex@N-term; Lys->Ala@24; Arg->Orn(R)@26                            | missed K-S@24                            | -0.02 | 2768.37 | 693.10   | 2768.39  | 693.11    | 4       | 73.9     |
|       | 44.5  | A0R1Y7     | MSMEG_4920                   | 99.0 | DFSGTDLGAIAR                | iTRAQ4plex@N-term; Dimethyl(R)@13                                         |                                          | 0.00  | 1506.81 | 754.41   | 1506.82  | 754.42    | 2       | 2.102.6  |
|       | 44.5  | A0R1Y7     | MSMEG_4920                   | 99.0 | GDPIEFAEDEGIR               | iTRAQ4plex@N-term                                                         |                                          | 0.03  | 1590.80 | 796.40   | 1590.76  | 796.39    | 2       | 1.177.6  |
|       | 44.5  | A0R1Y7     | MSMEG_4920                   | 99.0 | IALLHALELAR                 | iTRAQ4plex@N-term                                                         |                                          | 0.00  | 1320.80 | 441.27   | 1320.80  | 441.27    | 3       | 84.7     |
|       | 44.5  | A0R1Y7     | MSMEG_4920                   | 99.0 | MCLSGIDAIADQLIR             | iTRAQ4plex@N-term; Pyridylethyl(C)@2                                      |                                          | -0.01 | 2051.09 | 684.70   | 2051.10  | 684.71    | 3       | 65.1     |
|       | 44.5  | A0R1Y7     | MSMEG_4920                   | 99.0 | RKGDPIEFAEDEGIR             | No iTRAQ4plex@N-term; Lys->Arg@2                                          | cleaved Q-R@N-term; missed R-K@1; missed | 0.04  | 1758.90 | 587.31   | 1758.86  | 587.30    | 3       | 129.8    |
|       | 44.5  | A0R1Y7     | MSMEG_4920                   | 99.0 | TTSVIVAGAR                  | iTRAQ4plex@N-term                                                         | cleaved M-T@N-term                       | -0.01 | 1117.65 | 559.83   | 1117.66  | 559.84    | 2       | 1.929.7  |
|       | 44.5  | A0R1Y7     | MSMEG_4920                   | 99.0 | VNVNGGAIAGHPIGMSGAR         | iTRAQ4plex@N-term                                                         |                                          | -0.01 | 2034.08 | 679.03   | 2034.09  | 679.04    | 3       | 719.2    |
|       | 44.5  | A0R1Y7     | MSMEG_4920                   | 99.0 | YGDATLVDHLAYDGLHDVFTDQPMGAL | iTRAQ4plex@N-term                                                         |                                          | 0.04  | 3591.75 | 898.94   | 3591.71  | 898.93    | 4       | 209.1    |
|       | 44.5  | A0R1Y7     | MSMEG_4920                   | 99.0 | DFSGTDLGAIAR                | iTRAQ4plex@N-term                                                         |                                          | -0.01 | 1478.77 | 740.39   | 1478.79  | 740.40    | 2       | 3.954.3  |
|       | 44.5  | A0R1Y7     | MSMEG_4920                   | 99.0 | GDPIEFAEDEGIR               | iTRAQ4plex@N-term; Dimethyl(R)@13                                         |                                          | 0.02  | 1618.82 | 810.42   | 1618.80  | 810.41    | 2       | 372.5    |
|       | 44.5  | A0R1Y7     | MSMEG_4920                   | 99.0 | VNVNGGAIAGHPIGMSGAR         | iTRAQ4plex@N-term; Deamidated(N)@4                                        |                                          | 0.02  | 2035.10 | 679.37   | 2035.08  | 679.37    | 3       | 1.979.3  |
|       | 44.5  | A0R1Y7     | MSMEG_4920                   | 99.0 | VNVNGGAIAGHPIGMSGAR         | iTRAQ4plex@N-term; Deamidated(N)@4                                        |                                          | 0.03  | 2035.10 | 679.38   | 2035.08  | 679.37    | 3       | 322.7    |
|       | 44.5  | A0R1Y7     | MSMEG_4920                   | 99.0 | YGDATLVDHLAYDGLHDVFTDQPMGAL | iTRAQ4plex@N-term                                                         |                                          | 0.08  | 3591.79 | 898.95   | 3591.71  | 898.93    | 4       | 49.9     |
|       | 44.5  | A0R1Y7     | MSMEG_4920                   | 97.0 | YGDATLVDHLAYDGLHDVFTDQPMGAL | No iTRAQ4plex@N-term                                                      |                                          | -0.05 | 3447.55 | 862.90   | 3447.60  | 862.91    | 4       | 44.6     |
|       | 44.5  | A0R1Y7     | MSMEG_4920                   | 95.0 | AEQDEYAAQSHQK               | iTRAQ4plex@N-term; Lys->Gln@13                                            |                                          | 0.06  | 1647.78 | 550.27   | 1647.72  | 550.25    | 3       |          |
|       | 44.5  | A0R1Y7     | MSMEG_4920                   | 81.0 | YGDATLVDHLAYDGLHDVFTDQPMGAL | No iTRAQ4plex@N-term                                                      |                                          | -0.06 | 3447.54 | 862.89   | 3447.60  | 862.91    | 4       | 34.6     |
| 41    | 44.2  | A0R200     | MSMEG_4936                   | 99.0 | DEQGQDVLFLIDNIFR            | iTRAQ4plex@N-term                                                         |                                          | 0.00  | 2065.06 | 689.36   | 2065.06  | 689.36    | 3       | 64.0     |
|       | 44.2  | A0R200     | MSMEG_4936                   | 99.0 | DTALVFGQMDPEPPGTR           | iTRAQ4plex@N-term                                                         |                                          | 0.00  | 1876.91 | 626.64   | 1876.91  | 626.64    | 3       | 79.0     |
|       | 44.2  | A0R200     | MSMEG_4936                   | 99.0 | GIFPAVDPLASSSTILDPAIVGDEHYR | iTRAQ4plex@N-term                                                         |                                          | -0.03 | 2983.51 | 746.89   | 2983.54  | 746.89    | 4       | 34.8     |
|       | 44.2  | A0R200     | MSMEG_4936                   | 99.0 | ITGPVVDFEFPFR               | iTRAQ4plex@N-term                                                         |                                          | 0.01  | 1471.82 | 736.92   | 1471.82  | 736.92    | 2       | 1.747.2  |
|       | 44.2  | A0R200     | MSMEG_4936                   | 99.0 | NFGGTSVFAGVGER              | iTRAQ4plex@N-term                                                         |                                          | 0.00  | 1540.77 | 771.39   | 1540.78  | 771.40    | 2       | 2.553.5  |
|       | 44.2  | A0R200     | MSMEG_4936                   | 99.0 | TLTLEVAQHLGDSLVR            | No iTRAQ4plex@N-term                                                      |                                          | -0.05 | 1750.91 | 584.64   | 1750.96  | 584.66    | 3       | 34.7     |
|       | 44.2  | A0R200     | MSMEG_4936                   | 99.0 | TVLIQEMINR                  | iTRAQ4plex@N-term                                                         |                                          | -0.01 | 1359.76 | 680.89   | 1359.77  | 680.89    | 2       | 2.237.6  |
|       | 44.2  | A0R200     | MSMEG_4936                   | 99.0 | VALSALTMAEFFR               | iTRAQ4plex@N-term                                                         |                                          | 0.01  | 1598.88 | 800.45   | 1598.86  | 800.44    | 2       | 1.306.6  |

Supplement Table 1A

| Index | % Cov | Uniprot ID | Gene locus<br>(M. smegmatis) | Conf | Peptide Sequence            | Modifications                                    | Cleavages          | ΔMass | Prec MW | Prec m/z | Calc. MW | Calc. m/z | Theor z | Area 115 |
|-------|-------|------------|------------------------------|------|-----------------------------|--------------------------------------------------|--------------------|-------|---------|----------|----------|-----------|---------|----------|
|       | 44.2  | A0R200     | MSMEG_4936                   | 99.0 | VVDLLTPYVR                  | ITRAQ4plex@N-term                                |                    | 0.00  | 1317.78 | 659.90   | 1317.78  | 659.90    | 2       | 3.596.8  |
|       | 44.2  | A0R200     | MSMEG_4936                   | 99.0 | GIFPAVDPLASSSTILDPAIVGDEHYR | ITRAQ4plex@N-term                                |                    | 0.00  | 2983.54 | 746.89   | 2983.54  | 746.89    | 4       |          |
|       | 44.2  | A0R200     | MSMEG_4936                   | 96.0 | GSPPELLFNALHAEITFGALAK      | ITRAQ4plex@N-term; ITRAQ4plex(T)@15; Lys->Gln@21 |                    | 0.06  | 2472.39 | 825.14   | 2472.33  | 825.12    | 3       | 252.5    |
|       | 44.2  | A0R200     | MSMEG_4936                   | 92.0 | VAQEVIR                     | ITRAQ4plex@N-term                                |                    | 0.02  | 957.59  | 479.80   | 957.57   | 479.79    | 2       | 1.985.1  |
|       | 44.2  | A0R200     | MSMEG_4936                   | 83.0 | TLTLEVAQHLGDSLVR            | ITRAQ4plex@N-term; Ser->Asn@13; Deamidated(R)@16 |                    | 0.06  | 1923.11 | 642.05   | 1923.05  | 642.03    | 3       | 28.2     |
| 42    | 44.2  | A0R566     | MSMEG_6082                   | 99.0 | ATLSALDEGEVPSGFVR           | ITRAQ4plex@N-term                                |                    | -0.03 | 1890.95 | 631.32   | 1890.98  | 631.33    | 3       | 73.3     |
|       | 44.2  | A0R566     | MSMEG_6082                   | 99.0 | STAIAQGLAAGTQAIVGTTYHLADGR  | ITRAQ4plex@N-term                                |                    | -0.05 | 2686.37 | 896.46   | 2686.42  | 896.48    | 3       | 95.4     |
| 43    | 44.1  | A0QUX7     | MSMEG_2373                   | 99.0 | EIAQSGVVSFSR                | ITRAQ4plex@N-term                                |                    | 0.00  | 1374.76 | 688.39   | 1374.76  | 688.39    | 2       | 339.0    |
|       | 44.1  | A0QUX7     | MSMEG_2373                   | 99.0 | IVEQEEDNSVSR                | ITRAQ4plex@N-term                                |                    | 0.00  | 1547.76 | 774.89   | 1547.75  | 774.88    | 2       | 3.759.4  |
|       | 44.1  | A0QUX7     | MSMEG_2373                   | 99.0 | VLEPYGIR                    | ITRAQ4plex@N-term                                |                    | 0.01  | 1089.64 | 545.83   | 1089.63  | 545.82    | 2       | 1.306.2  |
|       | 44.1  | A0QUX7     | MSMEG_2373                   | 99.0 | EIAQSGVVSFSR                | ITRAQ4plex@N-term                                |                    | 0.01  | 1374.76 | 688.39   | 1374.76  | 688.39    | 2       | 680.2    |
|       | 44.1  | A0QUX7     | MSMEG_2373                   | 99.0 | GQIIEAVNLFR                 | ITRAQ4plex@N-term                                |                    | 0.02  | 1402.82 | 702.42   | 1402.81  | 702.41    | 2       | 1.304.3  |
|       | 44.1  | A0QUX7     | MSMEG_2373                   | 94.0 | VSSLSFSR                    | ITRAQ4plex@N-term                                |                    | 0.00  | 938.53  | 470.27   | 938.53   | 470.27    | 2       | 3.301.2  |
| 44    | 43.6  | A0QRM0     | MSMEG_1165                   | 99.0 | ADSSFDVVS                   | ITRAQ4plex@N-term; ITRAQ4plex(S)@9; Lys->Gln@10  | cleaved M-A@N-term | 0.05  | 1341.72 | 671.87   | 1341.67  | 671.84    | 2       | 3.501.7  |
|       | 43.6  | A0QRM0     | MSMEG_1165                   | 99.0 | AQIQGDEIR                   | ITRAQ4plex@N-term                                |                    | 0.05  | 1172.67 | 587.34   | 1172.63  | 587.32    | 2       | 1.318.7  |
|       | 43.6  | A0QRM0     | MSMEG_1165                   | 99.0 | GADLDVALQFVNYR              | ITRAQ4plex@N-term                                |                    | 0.02  | 1723.92 | 575.65   | 1723.90  | 575.64    | 3       | 8.7      |
| 45    | 43.5  | A0R2V4     | MSMEG_5246                   | 99.0 | DFPVAPHSSR                  | ITRAQ4plex@N-term                                |                    | 0.00  | 1255.65 | 419.56   | 1255.64  | 419.55    | 3       | 183.2    |
|       | 43.5  | A0R2V4     | MSMEG_5246                   | 99.0 | IGLAPALDEVPPPTPR            | ITRAQ4plex@N-term                                |                    | -0.03 | 1785.98 | 596.34   | 1786.01  | 596.34    | 3       | 45.2     |
|       | 43.5  | A0R2V4     | MSMEG_5246                   | 99.0 | LDVATLANAVQLAAR             | ITRAQ4plex@N-term                                |                    | -0.03 | 1668.93 | 835.47   | 1668.96  | 835.49    | 2       | 695.5    |
|       | 43.5  | A0R2V4     | MSMEG_5246                   | 99.0 | LIAEDGELK                   | ITRAQ4plex@N-term; Lys->Gln@9                    |                    | 0.05  | 1130.65 | 566.33   | 1130.59  | 566.30    | 2       | 2.515.9  |
|       | 43.5  | A0R2V4     | MSMEG_5246                   | 99.0 | LPMSAYVDWDAFETLLR           | ITRAQ4plex@N-term; Dimethyl(R)@17                |                    | 0.05  | 2198.17 | 733.73   | 2198.12  | 733.71    | 3       | 59.4     |
|       | 43.5  | A0R2V4     | MSMEG_5246                   | 99.0 | RPALNNDAAITVVLSTDGYSR       | ITRAQ4plex@N-term                                |                    | -0.04 | 2376.21 | 793.08   | 2376.25  | 793.09    | 3       | 12.0     |
|       | 43.5  | A0R2V4     | MSMEG_5246                   | 99.0 | LDVATLANAVQLAAR             | ITRAQ4plex@N-term; Dimethyl(R)@15                |                    | 0.03  | 1697.02 | 849.52   | 1697.00  | 849.51    | 2       | 1.068.9  |
|       | 43.5  | A0R2V4     | MSMEG_5246                   | 99.0 | LIVDLTANAVQLAAR             | ITRAQ4plex@N-term                                |                    | 0.01  | 1668.98 | 557.33   | 1668.96  | 557.33    | 3       |          |
| 46    | 42.4  | A0R461     | MSMEG_5715                   | 99.0 | FGLFIPQGWR                  | ITRAQ4plex@N-term                                |                    | 0.01  | 1363.77 | 682.89   | 1363.75  | 682.88    | 2       | 98.8     |
|       | 42.4  | A0R461     | MSMEG_5715                   | 99.0 | LDEGVQIMR                   | ITRAQ4plex@N-term                                |                    | 0.00  | 1203.64 | 602.83   | 1203.64  | 602.83    | 2       | 1.585.3  |
|       | 42.4  | A0R461     | MSMEG_5715                   | 99.0 | TVGTFDAIVR                  | ITRAQ4plex@N-term                                |                    | 0.01  | 1336.72 | 669.37   | 1336.71  | 669.36    | 2       | 814.8    |
|       | 42.4  | A0R461     | MSMEG_5715                   | 99.0 | VAATDVISGGR                 | ITRAQ4plex@N-term                                |                    | 0.00  | 1289.70 | 645.86   | 1289.71  | 645.86    | 2       | 288.4    |
|       | 42.4  | A0R461     | MSMEG_5715                   | 96.0 | FGLFIPQGWR                  | ITRAQ4plex@N-term                                |                    | 0.01  | 1363.76 | 682.89   | 1363.75  | 682.88    | 2       | 176.6    |
| 47    | 42.1  | A0QUX8     | MSMEG_2374                   | 99.0 | ANAEHPIEVTGK                | ITRAQ4plex@N-term; Lys->Gln@12                   |                    | 0.04  | 1408.74 | 470.59   | 1408.71  | 470.58    | 3       | 59.8     |
|       | 42.1  | A0QUX8     | MSMEG_2374                   | 99.0 | APENVTVGMVAPK               | ITRAQ4plex@N-term; Lys->Gln@13                   |                    | 0.05  | 1455.80 | 728.91   | 1455.75  | 728.88    | 2       | 1.115.9  |
|       | 42.1  | A0QUX8     | MSMEG_2374                   | 99.0 | DLMSWVDRPITETA              | ITRAQ4plex@N-term                                |                    | 0.00  | 1776.88 | 889.45   | 1776.88  | 889.45    | 2       | 1.216.6  |
|       | 42.1  | A0QUX8     | MSMEG_2374                   | 99.0 | GEGQALALSAAAIGGAR           | ITRAQ4plex@N-term; Ala->Val@17                   |                    | 0.00  | 1847.00 | 616.67   | 1847.00  | 616.67    | 3       | 20.7     |
|       | 42.1  | A0QUX8     | MSMEG_2374                   | 99.0 | LIVDLIYEGGIAR               | ITRAQ4plex@N-term                                |                    | -0.01 | 1574.90 | 788.46   | 1574.92  | 788.46    | 2       | 125.7    |
|       | 42.1  | A0QUX8     | MSMEG_2374                   | 99.0 | LVANVEGGNK                  | ITRAQ4plex@N-term; Lys->Gln@10                   |                    | 0.05  | 1143.65 | 572.83   | 1143.60  | 572.81    | 2       | 1.088.1  |
|       | 42.1  | A0QUX8     | MSMEG_2374                   | 99.0 | VAVIGYGSQGHAAH              | ITRAQ4plex@N-term                                | cleaved H-S@C-term | 0.01  | 1438.75 | 480.59   | 1438.74  | 480.59    | 3       | 198.9    |
|       | 42.1  | A0QUX8     | MSMEG_2374                   | 99.0 | VAVIGYGSQGHAAHSLSLR         | No ITRAQ4plex@N-term                             |                    | -0.02 | 1850.96 | 463.75   | 1850.98  | 463.75    | 4       | 81.9     |
|       | 42.1  | A0QUX8     | MSMEG_2374                   | 99.0 | AVEMFYDDADLSIIQGR           | ITRAQ4plex@N-term                                | cleaved M-A@N-term | 0.03  | 2201.07 | 734.70   | 2201.04  | 734.69    | 3       | 44.6     |
|       | 42.1  | A0QUX8     | MSMEG_2374                   | 99.0 | LIVDLIYEGGIAR               | ITRAQ4plex@N-term                                |                    | 0.01  | 1574.92 | 788.47   | 1574.92  | 788.46    | 2       | 316.1    |
| 48    | 41.9  | A0R0S1     | MSMEG_4487                   | 99.0 | AAIADLLNETEGFR              | ITRAQ4plex@N-term                                |                    | -0.02 | 1662.85 | 832.43   | 1662.87  | 832.44    | 2       | 1.438.0  |
|       | 41.9  | A0R0S1     | MSMEG_4487                   | 99.0 | SAQELHDELRL                 | ITRAQ4plex@N-term                                |                    | 0.00  | 1340.68 | 447.90   | 1340.68  | 447.90    | 3       | 319.8    |
|       | 41.9  | A0R0S1     | MSMEG_4487                   | 99.0 | TDTGESVYR                   | ITRAQ4plex@N-term                                |                    | 0.01  | 1170.57 | 586.29   | 1170.56  | 586.29    | 2       | 88.3     |
|       | 41.9  | A0R0S1     | MSMEG_4487                   | 99.0 | AAIADLLNETEGFR              | ITRAQ4plex@N-term; Dimethyl(R)@14                |                    | -0.03 | 1690.87 | 846.44   | 1690.90  | 846.46    | 2       | 242.3    |
| 49    | 41.9  | A0QZ34     | MSMEG_3881                   | 99.0 | DVLAEEGLAEAFVHR             | ITRAQ4plex@N-term                                |                    | -0.01 | 1740.92 | 581.31   | 1740.93  | 581.32    | 3       | 233.7    |
|       | 41.9  | A0QZ34     | MSMEG_3881                   | 99.0 | GMAFSVPEPGVYFPGQWGAR        | ITRAQ4plex@N-term                                |                    | 0.06  | 2199.13 | 734.05   | 2199.07  | 734.03    | 3       | 123.2    |
|       | 41.9  | A0QZ34     | MSMEG_3881                   | 99.0 | TGHGIGLSVHEEPIVAGNNPLER     | ITRAQ4plex@N-term                                |                    | 0.02  | 2815.50 | 704.88   | 2815.47  | 704.88    | 4       | 30.4     |
|       | 41.9  | A0QZ34     | MSMEG_3881                   | 99.0 | YALLQQAAQAAVAARPGVTAEQVDAA  | ITRAQ4plex@N-term                                |                    | -0.03 | 3109.64 | 778.42   | 3109.68  | 778.43    | 4       | 251.2    |
|       | 41.9  | A0QZ34     | MSMEG_3881                   | 91.0 | AQTFER                      | ITRAQ4plex@N-term                                |                    | 0.00  | 894.47  | 448.24   | 894.47   | 448.24    | 2       | 135.4    |
| 50    | 41.6  | A0QQU1     | MSMEG_0877                   | 99.0 | AGADAVVATPPFYVAPHADDEVIR    | ITRAQ4plex@N-term                                |                    | 0.04  | 2509.35 | 837.46   | 2509.31  | 837.44    | 3       | 27.0     |
|       | 41.6  | A0QQU1     | MSMEG_0877                   | 99.0 | AHLAANADTGLR                | ITRAQ4plex@N-term                                |                    | -0.01 | 1352.72 | 451.91   | 1352.73  | 451.92    | 3       | 177.7    |
|       | 41.6  | A0QQU1     | MSMEG_0877                   | 99.0 | CADPLLPLESSEIDAVR           | ITRAQ4plex@N-term; Pyridylethyl(C)@1             |                    | 0.01  | 2076.08 | 693.03   | 2076.07  | 693.03    | 3       | 248.6    |
|       | 41.6  | A0QQU1     | MSMEG_0877                   | 99.0 | DSSGDLDGFR                  | ITRAQ4plex@N-term                                |                    | -0.01 | 1211.54 | 606.78   | 1211.55  | 606.78    | 2       | 567.0    |

Supplement Table 1A

| Index | % Cov | Uniprot ID | Gene locus<br>(M. smegmatis) | Conf | Peptide Sequence            | Modifications                                     | Cleavages          | ΔMass | Prec MW | Prec m/z | Calc. MW | Calc. m/z | Theor z | Area 115 |
|-------|-------|------------|------------------------------|------|-----------------------------|---------------------------------------------------|--------------------|-------|---------|----------|----------|-----------|---------|----------|
|       | 41.6  | A0QQU1     | MSMEG_0877                   | 99.0 | IFAIVDVADR                  | iTRAQ4plex@N-term                                 |                    | 0.02  | 1261.73 | 631.87   | 1261.72  | 631.86    | 2       | 1.530.4  |
|       | 41.6  | A0QQU1     | MSMEG_0877                   | 99.0 | LIAAAVDVPPVAYDIPSATHSPLTR   | iTRAQ4plex@N-term                                 |                    | -0.04 | 2719.46 | 680.87   | 2719.50  | 680.88    | 4       | 91.3     |
|       | 41.6  | A0QQU1     | MSMEG_0877                   | 99.0 | AIQVAAGAASQVPLVGGVIDTGAR    | iTRAQ4plex@N-term                                 |                    | 0.01  | 2522.40 | 841.81   | 2522.39  | 841.81    | 3       | 172.7    |
| 51    | 40.9  | A0QTK6     | MSMEG_1878                   | 99.0 | DPLAGLDVSR                  | iTRAQ4plex@N-term                                 |                    | -0.01 | 1185.63 | 593.82   | 1185.65  | 593.83    | 2       | 3.228.5  |
|       | 40.9  | A0QTK6     | MSMEG_1878                   | 99.0 | GEACADSFYAFESAVQK           | iTRAQ4plex@N-term; Pyridylethyl(C)@4; Lys->Gln@18 |                    | -0.01 | 2171.95 | 724.99   | 2171.96  | 724.99    | 3       | 694.7    |
|       | 40.9  | A0QTK6     | MSMEG_1878                   | 99.0 | NDGVAEHEPGR                 | iTRAQ4plex@N-term                                 | cleaved Y-N@N-term | 0.01  | 1323.64 | 442.22   | 1323.63  | 442.22    | 3       |          |
|       | 40.9  | A0QTK6     | MSMEG_1878                   | 99.0 | NVEVPDHR                    | iTRAQ4plex@N-term                                 |                    | 0.00  | 1255.64 | 419.56   | 1255.64  | 419.55    | 3       | 257.5    |
|       | 40.9  | A0QTK6     | MSMEG_1878                   | 99.0 | TIYLFVDVLDHER               | iTRAQ4plex@N-term                                 |                    | -0.04 | 1792.87 | 598.63   | 1792.91  | 598.64    | 3       | 176.8    |
|       | 40.9  | A0QTK6     | MSMEG_1878                   | 99.0 | TMVVEDDR                    | iTRAQ4plex@N-term                                 |                    | -0.01 | 1107.53 | 554.77   | 1107.54  | 554.77    | 2       | 380.9    |
|       | 40.9  | A0QTK6     | MSMEG_1878                   | 99.0 | TPVSLAEATAK                 | iTRAQ4plex@N-term; Lys->Gln@11                    |                    | 0.03  | 1230.69 | 616.35   | 1230.66  | 616.34    | 2       | 7.200.1  |
|       | 40.9  | A0QTK6     | MSMEG_1878                   | 99.0 | YNDGVAEHEPGR                | iTRAQ4plex@N-term                                 |                    | 0.01  | 1486.70 | 496.57   | 1486.69  | 496.57    | 3       | 789.9    |
|       | 40.9  | A0QTK6     | MSMEG_1878                   | 99.0 | DPLAGLDVSR                  | iTRAQ4plex@N-term                                 |                    | -0.01 | 1185.64 | 593.83   | 1185.65  | 593.83    | 2       | 1.424.3  |
|       | 40.9  | A0QTK6     | MSMEG_1878                   | 99.0 | DPLAGLDVSR                  | iTRAQ4plex@N-term; Ser->Asp@9                     |                    | 0.04  | 1213.68 | 607.85   | 1213.64  | 607.83    | 2       | 539.4    |
|       | 40.9  | A0QTK6     | MSMEG_1878                   | 99.0 | YNDGVAEHEPGR                | iTRAQ4plex@N-term                                 |                    | 0.03  | 1486.72 | 496.58   | 1486.69  | 496.57    | 3       | 70.5     |
|       | 40.9  | A0QTK6     | MSMEG_1878                   | 99.0 | YNDGVAEHEPGR                | iTRAQ4plex@N-term                                 |                    | 0.01  | 1486.70 | 496.57   | 1486.69  | 496.57    | 3       | 45.7     |
|       | 40.9  | A0QTK6     | MSMEG_1878                   | 86.0 | TIYLFVDVLDHER               | iTRAQ4plex@N-term; Dimethyl(R)@13                 |                    | -0.02 | 1820.92 | 607.98   | 1820.94  | 607.99    | 3       | 39.1     |
|       | 40.9  | A0QTK6     | MSMEG_1878                   | 76.0 | YNDGVAEHEPGR                | No iTRAQ4plex@N-term                              |                    | 0.01  | 1342.60 | 448.54   | 1342.59  | 448.54    | 3       | 10.9     |
| 52    | 40.8  | A0QZ58     | MSMEG_3906                   | 99.0 | AVGPEGSVTSYEVR              | iTRAQ4plex@N-term                                 |                    | -0.01 | 1593.80 | 797.91   | 1593.81  | 797.91    | 2       | 1.384.0  |
|       | 40.8  | A0QZ58     | MSMEG_3906                   | 99.0 | DAAQVHEGDIFPGAR             | iTRAQ4plex@N-term                                 |                    | -0.03 | 1838.91 | 613.98   | 1838.94  | 613.99    | 3       | 879.3    |
|       | 40.8  | A0QZ58     | MSMEG_3906                   | 99.0 | LAPGAVAMPPLR                | iTRAQ4plex@N-term                                 |                    | 0.02  | 1335.80 | 668.91   | 1335.78  | 668.90    | 2       | 1.916.3  |
|       | 40.8  | A0QZ58     | MSMEG_3906                   | 99.0 | NVVTFFGERPANWNLVIGDVSVDYGPE | iTRAQ4plex@N-term                                 |                    | -0.07 | 3555.62 | 889.91   | 3555.69  | 889.93    | 4       | 73.4     |
|       | 40.8  | A0QZ58     | MSMEG_3906                   | 99.0 | VLEAGAGSGALTCSLLR           | iTRAQ4plex@N-term; Pyridylethyl(C)@13             |                    | -0.02 | 1865.99 | 623.01   | 1866.02  | 623.01    | 3       | 355.1    |
|       | 40.8  | A0QZ58     | MSMEG_3906                   | 98.0 | NVVTFFGER                   | iTRAQ4plex@N-term                                 | cleaved R-P@C-term | -0.01 | 1211.63 | 606.82   | 1211.64  | 606.83    | 2       | 550.9    |
|       | 40.8  | A0QZ58     | MSMEG_3906                   | 88.0 | NVVTFFGER                   | iTRAQ4plex@N-term                                 | cleaved R-P@C-term | -0.02 | 1211.62 | 606.82   | 1211.64  | 606.83    | 2       | 1.560.8  |
| 53    | 40.8  | A0R6Q7     | MSMEG_6636                   | 99.0 | AIWNVVNWQDVQVR              | iTRAQ4plex@N-term                                 |                    | -0.03 | 1869.96 | 624.33   | 1870.00  | 624.34    | 3       | 100.4    |
|       | 40.8  | A0R6Q7     | MSMEG_6636                   | 85.0 | GVNDAIAK                    | iTRAQ4plex@N-term; Lys->Gln@8                     |                    | 0.05  | 930.54  | 466.28   | 930.49   | 466.25    | 2       | 104.1    |
| 54    | 39.7  | A0QY23     | MSMEG_3507                   | 99.0 | IITSPSFGGDR                 | iTRAQ4plex@N-term                                 |                    | 0.01  | 1292.70 | 647.36   | 1292.68  | 647.35    | 2       | 4.128.0  |
|       | 39.7  | A0QY23     | MSMEG_3507                   | 99.0 | LYGVEESAYSNEDEMFDLHQMR      | iTRAQ4plex@N-term                                 |                    | 0.00  | 2919.32 | 974.11   | 2919.32  | 974.11    | 3       | 230.7    |
|       | 39.7  | A0QY23     | MSMEG_3507                   | 99.0 | MTSGQGFIALDQSGGSTPK         | iTRAQ4plex@N-term; Lys->Gln@20                    |                    | 0.03  | 2096.03 | 699.68   | 2096.00  | 699.67    | 3       | 244.5    |
|       | 39.7  | A0QY23     | MSMEG_3507                   | 99.0 | VALSGGYSR                   | iTRAQ4plex@N-term                                 | cleaved V-V@N-term | 0.01  | 1052.58 | 527.30   | 1052.57  | 527.29    | 2       | 1.311.0  |
|       | 39.7  | A0QY23     | MSMEG_3507                   | 99.0 | VLAAILFEQTMDR               | iTRAQ4plex@N-term                                 |                    | -0.02 | 1649.87 | 825.94   | 1649.89  | 825.95    | 2       | 192.9    |
|       | 39.7  | A0QY23     | MSMEG_3507                   | 99.0 | VVALSGGYSR                  | iTRAQ4plex@N-term                                 |                    | 0.03  | 1151.68 | 576.85   | 1151.64  | 576.83    | 2       | 4.659.7  |
|       | 39.7  | A0QY23     | MSMEG_3507                   | 99.0 | MTSGQGFIALDQSGGSTPK         | iTRAQ4plex@N-term; iTRAQ4plex(T)@18; Lys->Gln@20  |                    | 0.04  | 2240.14 | 747.72   | 2240.10  | 747.71    | 3       | 217.2    |
| 55    | 39.7  | A0QSG6     | MSMEG_1472                   | 99.0 | ESEALAAAAAR                 | iTRAQ4plex@N-term                                 |                    | 0.01  | 1202.64 | 602.33   | 1202.64  | 602.33    | 2       | 3.420.1  |
|       | 39.7  | A0QSG6     | MSMEG_1472                   | 99.0 | LLQRPEEVAAR                 | iTRAQ4plex@N-term                                 |                    | 0.03  | 1424.85 | 475.96   | 1424.82  | 475.95    | 3       | 991.5    |
|       | 39.7  | A0QSG6     | MSMEG_1472                   | 99.0 | SLGSDNAINVVHATVAALK         | iTRAQ4plex@N-term; iTRAQ4plex(T)@14; Lys->Gln@19  |                    | 0.02  | 2167.20 | 723.41   | 2167.18  | 723.40    | 3       | 257.8    |
|       | 39.7  | A0QSG6     | MSMEG_1472                   | 99.0 | SLGSDNAINVVHATVAALK         | iTRAQ4plex@N-term; Lys->Gln@19                    |                    | -0.01 | 2023.07 | 675.37   | 2023.08  | 675.37    | 3       | 74.8     |
|       | 39.7  | A0QSG6     | MSMEG_1472                   | 96.0 | GLPIEDVAPAGMLKAR            | iTRAQ4plex@N-term; Lys->Ser@14; Arg->Om(R)@16     | missed K-A@14      | 0.05  | 1697.96 | 849.99   | 1697.91  | 849.96    | 2       | 230.6    |
| 56    | 39.5  | A0QSZ1     | MSMEG_1652                   | 99.0 | DLGSAAAPFNAFLIAQGLETLSLR    | iTRAQ4plex@N-term                                 |                    | -0.01 | 2618.41 | 873.81   | 2618.42  | 873.81    | 3       | 227.7    |
|       | 39.5  | A0QSZ1     | MSMEG_1652                   | 99.0 | LAVGLEGIDDIADLEQGFAAAR      | iTRAQ4plex@N-term                                 | cleaved R-P@C-term | 0.04  | 2500.37 | 834.47   | 2500.33  | 834.45    | 3       | 32.6     |
|       | 39.5  | A0QSZ1     | MSMEG_1652                   | 99.0 | SLVIHPASTTHQQLSPEEQLTGVTPGL | iTRAQ4plex@N-term                                 |                    | -0.05 | 3325.73 | 832.44   | 3325.78  | 832.45    | 4       | 106.8    |
| 57    | 39.4  | A0QSG5     | MSMEG_1471                   | 99.0 | AAGVETVVFDR                 | iTRAQ4plex@N-term                                 |                    | 0.01  | 1306.71 | 654.36   | 1306.70  | 654.36    | 2       | 1.155.1  |
| 58    | 39.2  | A0QQC8     | MSMEG_0709                   | 99.0 | ALEGTDISAIK                 | iTRAQ4plex@N-term; Lys->Gln@11                    |                    | 0.04  | 1260.71 | 631.36   | 1260.67  | 631.34    | 2       | 1.363.4  |
|       | 39.2  | A0QQC8     | MSMEG_0709                   | 99.0 | ATSGDNHLGGDDWDDR            | iTRAQ4plex@N-term                                 |                    | 0.03  | 1873.83 | 625.62   | 1873.79  | 625.61    | 3       | 394.0    |
|       | 39.2  | A0QQC8     | MSMEG_0709                   | 99.0 | DAEAHAEEDR                  | iTRAQ4plex@N-term                                 |                    | 0.02  | 1285.58 | 429.53   | 1285.57  | 429.53    | 3       | 71.3     |
|       | 39.2  | A0QQC8     | MSMEG_0709                   | 99.0 | DAGISVSDIDHVVLVGGSTR        | iTRAQ4plex@N-term                                 |                    | 0.00  | 2140.13 | 714.38   | 2140.12  | 714.38    | 3       | 130.2    |
|       | 39.2  | A0QQC8     | MSMEG_0709                   | 99.0 | EAGQIAGLNVLR                | iTRAQ4plex@N-term                                 |                    | 0.00  | 1383.79 | 692.90   | 1383.80  | 692.91    | 2       | 3.530.1  |
|       | 39.2  | A0QQC8     | MSMEG_0709                   | 99.0 | GVNPDEVAVGAALQAGVLK         | iTRAQ4plex@N-term; Lys->Gln@20                    |                    | 0.05  | 2050.17 | 684.40   | 2050.12  | 684.38    | 3       |          |
|       | 39.2  | A0QQC8     | MSMEG_0709                   | 99.0 | NQAVTNVDR                   | iTRAQ4plex@N-term                                 |                    | 0.05  | 1159.65 | 580.83   | 1159.61  | 580.81    | 2       | 224.1    |
|       | 39.2  | A0QQC8     | MSMEG_0709                   | 99.0 | YTPQESAR                    | iTRAQ4plex@N-term                                 |                    | 0.02  | 1207.65 | 604.83   | 1207.63  | 604.82    | 2       | 7.600.2  |
|       | 39.2  | A0QQC8     | MSMEG_0709                   | 99.0 | DAEAHAEEDR                  | iTRAQ4plex@N-term; Dimethyl(R)@10                 |                    | 0.02  | 1313.61 | 438.88   | 1313.60  | 438.87    | 3       | 20.7     |
|       | 39.2  | A0QQC8     | MSMEG_0709                   | 99.0 | DAGISVSDIDHVVLVGGSTR        | iTRAQ4plex@N-term                                 |                    | -0.05 | 2140.08 | 714.37   | 2140.12  | 714.38    | 3       | 179.9    |
|       | 39.2  | A0QQC8     | MSMEG_0709                   | 99.0 | DAGISVSDIDHVVLVGGSTR        | No iTRAQ4plex@N-term                              |                    | 0.01  | 1996.04 | 666.35   | 1996.02  | 666.35    | 3       |          |

Supplement Table 1A

| Index | % Cov | Uniprot ID | Gene locus<br>(M. smegmatis) | Conf | Peptide Sequence              | Modifications                                             | Cleavages                         | ΔMass | Prec MW | Prec m/z | Calc. MW | Calc. m/z | Theor z | Area 115 |
|-------|-------|------------|------------------------------|------|-------------------------------|-----------------------------------------------------------|-----------------------------------|-------|---------|----------|----------|-----------|---------|----------|
|       | 39.2  | A0QQC8     | MSMEG_0709                   | 99.0 | DAGISVSDIDHVVLVGGSTR          | ITRAQ4plex@N-term                                         |                                   | 0.06  | 2140.18 | 714.40   | 2140.12  | 714.38    | 3       | 103.0    |
|       | 39.2  | A0QQC8     | MSMEG_0709                   | 99.0 | GVNPDEVVAVGAALQAGVLK          | ITRAQ4plex@N-term; Lys->Arg@20                            |                                   | 0.03  | 2078.19 | 693.74   | 2078.16  | 693.73    | 3       |          |
|       | 39.2  | A0QQC8     | MSMEG_0709                   | 98.0 | GSSGIDLTK                     | ITRAQ4plex@N-term; Lys->Gln@9                             |                                   | 0.03  | 1020.55 | 511.28   | 1020.52  | 511.27    | 2       | 126.5    |
|       | 39.2  | A0QQC8     | MSMEG_0709                   | 98.0 | TTPSVVAFAR                    | ITRAQ4plex@N-term                                         |                                   | 0.02  | 1191.69 | 596.85   | 1191.67  | 596.84    | 2       | 3,262.6  |
|       | 39.2  | A0QQC8     | MSMEG_0709                   | 97.0 | ITQDLLDR                      | ITRAQ4plex@N-term; Dimethyl(R)@8                          |                                   | 0.00  | 1144.66 | 573.34   | 1144.66  | 573.34    | 2       | 934.9    |
|       | 39.2  | A0QQC8     | MSMEG_0709                   | 82.0 | IVNEPTAAALAYGLDK              | ITRAQ4plex@N-term; ITRAQ4plex(Y)@12; Lys->Gln@16          |                                   | 0.01  | 1933.05 | 645.36   | 1933.04  | 645.35    | 3       | 144.1    |
|       | 39.2  | A0QQC8     | MSMEG_0709                   | 79.0 | IVTWLVDK                      | ITRAQ4plex@N-term; Lys->Gln@8                             |                                   | 0.05  | 1116.68 | 559.35   | 1116.63  | 559.32    | 2       | 759.0    |
| 59    | 39.0  | A0QTE3     | MSMEG_1809                   | 99.0 | DTLLDVPTR                     | ITRAQ4plex@N-term                                         |                                   | 0.01  | 1160.62 | 581.32   | 1160.62  | 581.32    | 2       | 2,488.9  |
|       | 39.0  | A0QTE3     | MSMEG_1809                   | 99.0 | LVTADWLASNLGR                 | ITRAQ4plex@N-term                                         | cleaved R-P@C-term                | 0.00  | 1558.86 | 780.44   | 1558.86  | 780.44    | 2       | 2,952.3  |
|       | 39.0  | A0QTE3     | MSMEG_1809                   | 99.0 | NYDGSWTEWGNVAVR               | ITRAQ4plex@N-term                                         |                                   | 0.01  | 1797.82 | 600.28   | 1797.82  | 600.28    | 3       | 62.6     |
|       | 39.0  | A0QTE3     | MSMEG_1809                   | 99.0 | PGLAIVESDEDEVLlyDTGHIPGAVK    | No ITRAQ4plex@N-term; Lys->Gln@25                         | cleaved R-P@N-term                | 0.01  | 2607.31 | 870.11   | 2607.31  | 870.11    | 3       | 8.7      |
|       | 39.0  | A0QTE3     | MSMEG_1809                   | 99.0 | QSSGYPVVER                    | ITRAQ4plex@N-term                                         |                                   | 0.01  | 1264.67 | 633.34   | 1264.65  | 633.33    | 2       | 3,680.4  |
|       | 39.0  | A0QTE3     | MSMEG_1809                   | 99.0 | SLPADPSPTLAEYHPER             | ITRAQ4plex@N-term                                         | cleaved M-S@N-term                | 0.06  | 2094.11 | 699.04   | 2094.05  | 699.02    | 3       | 451.3    |
| 60    | 38.5  | A0R3E3     | MSMEG_5442                   | 99.0 | AVNAGGVATSALEMQQNASR          | ITRAQ4plex@N-term                                         |                                   | 0.02  | 2118.09 | 707.04   | 2118.06  | 707.03    | 3       | 210.0    |
|       | 38.5  | A0R3E3     | MSMEG_5442                   | 99.0 | DSWTFDDTEGR                   | ITRAQ4plex@N-term                                         |                                   | 0.02  | 1471.65 | 736.83   | 1471.63  | 736.82    | 2       | 578.1    |
|       | 38.5  | A0R3E3     | MSMEG_5442                   | 99.0 | HIGEYTDVPAGDIGVGR             | ITRAQ4plex@N-term                                         |                                   | 0.02  | 2000.03 | 667.68   | 2000.01  | 667.68    | 3       | 332.0    |
|       | 38.5  | A0R3E3     | MSMEG_5442                   | 99.0 | HPEYADNAIR                    | ITRAQ4plex@N-term                                         |                                   | 0.00  | 1441.74 | 481.59   | 1441.74  | 481.59    | 3       | 393.1    |
|       | 38.5  | A0R3E3     | MSMEG_5442                   | 99.0 | IDAYAEAR                      | ITRAQ4plex@N-term                                         |                                   | -0.01 | 1051.53 | 526.77   | 1051.54  | 526.78    | 2       | 1,576.6  |
|       | 38.5  | A0R3E3     | MSMEG_5442                   | 99.0 | LOAVFEEVSHR                   | ITRAQ4plex@N-term                                         |                                   | -0.02 | 1457.76 | 486.93   | 1457.77  | 486.93    | 3       | 313.0    |
|       | 38.5  | A0R3E3     | MSMEG_5442                   | 99.0 | VPWVDDTGHVQINR                | ITRAQ4plex@N-term                                         |                                   | 0.01  | 1778.93 | 593.98   | 1778.92  | 593.98    | 3       | 500.1    |
|       | 38.5  | A0R3E3     | MSMEG_5442                   | 99.0 | HIGEYTDVPAGDIGVGR             | ITRAQ4plex@N-term                                         |                                   | 0.00  | 2000.01 | 667.68   | 2000.01  | 667.68    | 3       | 356.5    |
|       | 38.5  | A0R3E3     | MSMEG_5442                   | 86.0 | SDAEIMR                       | ITRAQ4plex@N-term                                         |                                   | 0.00  | 964.47  | 483.24   | 964.48   | 483.25    | 2       | 98.6     |
| 61    | 38.3  | A0QUY2     | MSMEG_2378                   | 99.0 | ADFSVHLPK                     | ITRAQ4plex@N-term; Lys->Gln@10                            |                                   | 0.02  | 1269.71 | 424.24   | 1269.68  | 424.24    | 3       | 117.7    |
|       | 38.3  | A0QUY2     | MSMEG_2378                   | 99.0 | AGTDVAASVK                    | ITRAQ4plex@N-term; Lys->Gln@10                            |                                   | 0.03  | 1061.57 | 531.79   | 1061.55  | 531.78    | 2       | 123.3    |
|       | 38.3  | A0QUY2     | MSMEG_2378                   | 99.0 | GGLIDEQALADAITSGHVR           | ITRAQ4plex@N-term                                         |                                   | -0.07 | 2066.02 | 689.68   | 2066.09  | 689.70    | 3       | 88.6     |
|       | 38.3  | A0QUY2     | MSMEG_2378                   | 99.0 | GVLVNAPTSNIHSAEHAIALLLATAR    | ITRAQ4plex@N-term                                         |                                   | -0.06 | 2952.60 | 739.16   | 2952.66  | 739.17    | 4       | 34.4     |
|       | 38.3  | A0QUY2     | MSMEG_2378                   | 99.0 | GVTAESTATESPNHR               | ITRAQ4plex@N-term                                         |                                   | 0.03  | 1812.94 | 605.32   | 1812.91  | 605.31    | 3       | 198.4    |
|       | 38.3  | A0QUY2     | MSMEG_2378                   | 99.0 | IVAYDPYVQAR                   | ITRAQ4plex@N-term                                         | cleaved H-I@N-term                | 0.00  | 1524.80 | 763.41   | 1524.81  | 763.41    | 2       | 426.0    |
|       | 38.3  | A0QUY2     | MSMEG_2378                   | 99.0 | LAESTVAALGDEVEVR              | ITRAQ4plex@N-term                                         |                                   | 0.01  | 1801.96 | 601.66   | 1801.95  | 601.66    | 3       |          |
|       | 38.3  | A0QUY2     | MSMEG_2378                   | 99.0 | LLAAVPEADALLVR                | ITRAQ4plex@N-term                                         |                                   | 0.00  | 1593.95 | 797.98   | 1593.96  | 797.99    | 2       | 1,691.1  |
|       | 38.3  | A0QUY2     | MSMEG_2378                   | 99.0 | VDTVPDDVVR                    | ITRAQ4plex@N-term                                         |                                   | 0.01  | 1273.64 | 637.83   | 1273.63  | 637.82    | 2       | 2,093.1  |
|       | 38.3  | A0QUY2     | MSMEG_2378                   | 96.0 | GLFSAVVDEQVTFVNAPALAADR       | ITRAQ4plex@N-term                                         |                                   | 0.01  | 2533.34 | 845.45   | 2533.33  | 845.45    | 3       | 13.0     |
|       | 38.3  | A0QUY2     | MSMEG_2378                   | 93.0 | AGTDVAASVK                    | ITRAQ4plex@N-term; Lys->Gln@10                            |                                   | 0.03  | 1061.58 | 531.80   | 1061.55  | 531.78    | 2       | 152.3    |
| 62    | 38.2  | A0QQI6     | MSMEG_0768                   | 99.0 | FVGVPLDSSLQR                  | ITRAQ4plex@N-term                                         |                                   | 0.00  | 1460.81 | 731.41   | 1460.81  | 731.41    | 2       | 994.0    |
|       | 38.2  | A0QQI6     | MSMEG_0768                   | 99.0 | SIGAAEAATAAGIGPSYNILDGFEGHLDI | ITRAQ4plex@N-term                                         |                                   | 0.00  | 3259.58 | 815.90   | 3259.59  | 815.90    | 4       | 144.1    |
|       | 38.2  | A0QQI6     | MSMEG_0768                   | 99.0 | FVGVPLDSSLQR                  | ITRAQ4plex@N-term                                         |                                   | 0.02  | 1460.83 | 731.42   | 1460.81  | 731.41    | 2       | 621.9    |
|       | 38.2  | A0QQI6     | MSMEG_0768                   | 92.0 | DVVYIEWNR                     | ITRAQ4plex@N-term                                         |                                   | -0.01 | 1336.68 | 669.35   | 1336.69  | 669.35    | 2       | 343.0    |
| 63    | 38.0  | A0R0B4     | MSMEG_4327                   | 99.0 | DIDHVNHAHATATPIGDTAEANALR     | ITRAQ4plex@N-term                                         |                                   | 0.03  | 2616.33 | 655.09   | 2616.30  | 655.08    | 4       | 1,608.0  |
|       | 38.0  | A0R0B4     | MSMEG_4327                   | 99.0 | IGGHLVDNIDDMTR                | No ITRAQ4plex@N-term; Gly->Pro@2                          |                                   | 0.00  | 1731.84 | 578.29   | 1731.84  | 578.29    | 3       | 118.7    |
|       | 38.0  | A0R0B4     | MSMEG_4327                   | 99.0 | IVETYDAMNEGGPR                | ITRAQ4plex@N-term                                         |                                   | 0.01  | 1694.81 | 848.41   | 1694.81  | 848.41    | 2       | 2,313.5  |
|       | 38.0  | A0R0B4     | MSMEG_4327                   | 99.0 | LMGAGITSDAFHMVAPAADGLR        | ITRAQ4plex@N-term                                         |                                   | 0.02  | 2344.20 | 782.41   | 2344.18  | 782.40    | 3       | 173.4    |
|       | 38.0  | A0R0B4     | MSMEG_4327                   | 99.0 | QLWENAGAPEVDPDR               | ITRAQ4plex@N-term; Dimethyl(R)@15                         |                                   | -0.03 | 1867.89 | 623.64   | 1867.92  | 623.65    | 3       | 52.2     |
|       | 38.0  | A0R0B4     | MSMEG_4327                   | 99.0 | VAGVEHAAVYAPK                 | ITRAQ4plex@N-term; Lys->Gln@13                            |                                   | 0.03  | 1454.80 | 485.94   | 1454.76  | 485.93    | 3       | 1,622.5  |
|       | 38.0  | A0R0B4     | MSMEG_4327                   | 99.0 | VLEDEFVTK                     | ITRAQ4plex@N-term; Lys->Gln@9                             |                                   | 0.05  | 1222.67 | 612.34   | 1222.62  | 612.32    | 2       | 1,153.7  |
|       | 38.0  | A0R0B4     | MSMEG_4327                   | 99.0 | YAINNSFGFGGHNVALAFGR          | ITRAQ4plex@N-term                                         |                                   | 0.02  | 2255.16 | 752.73   | 2255.14  | 752.72    | 3       | 721.4    |
|       | 38.0  | A0R0B4     | MSMEG_4327                   | 99.0 | DIDHVNHAHATATPIGDTAEANALR     | ITRAQ4plex@N-term                                         |                                   | 0.04  | 2616.34 | 655.09   | 2616.30  | 655.08    | 4       | 515.2    |
|       | 38.0  | A0R0B4     | MSMEG_4327                   | 99.0 | DIDHVNHAHATATPIGDTAEANALR     | ITRAQ4plex@N-term; Dimethyl(R)@24                         |                                   | -0.04 | 2644.29 | 662.08   | 2644.33  | 662.09    | 4       | 236.7    |
|       | 38.0  | A0R0B4     | MSMEG_4327                   | 99.0 | LMGAGITSDAFHMVAPAADGLR        | No ITRAQ4plex@N-term                                      |                                   | -0.02 | 2200.06 | 734.36   | 2200.08  | 734.37    | 3       | 109.2    |
|       | 38.0  | A0R0B4     | MSMEG_4327                   | 99.0 | LMGAGITSDAFHMVAPAADGLR        | ITRAQ4plex@N-term; Oxidation(H)@12                        |                                   | 0.00  | 2360.17 | 787.73   | 2360.17  | 787.73    | 3       | 122.1    |
|       | 38.0  | A0R0B4     | MSMEG_4327                   | 99.0 | QLWENAGAPEVDPDR               | ITRAQ4plex@N-term                                         |                                   | -0.02 | 1839.87 | 614.30   | 1839.89  | 614.30    | 3       | 143.8    |
|       | 38.0  | A0R0B4     | MSMEG_4327                   | 99.0 | YAINNSFGFGGHNVALAFGR          | ITRAQ4plex@N-term                                         |                                   | -0.04 | 2255.10 | 752.71   | 2255.14  | 752.72    | 3       | 216.4    |
|       | 38.0  | A0R0B4     | MSMEG_4327                   | 96.0 | FAVVIGTGLGGGEKI               | ITRAQ4plex@N-term; Gly->Ser@12; Lys->Glu@14               | cleaved I-V@C-term; missed K-I@14 | 0.07  | 1591.93 | 796.97   | 1591.86  | 796.94    | 2       | 1,497.3  |
|       | 38.0  | A0R0B4     | MSMEG_4327                   | 94.0 | VAGVEHAAVYAPK                 | No ITRAQ4plex@N-term; ITRAQ4plex(Y)@10; Lys->Gln@13       |                                   | 0.03  | 1454.80 | 485.94   | 1454.76  | 485.93    | 3       | 442.4    |
|       | 38.0  | A0R0B4     | MSMEG_4327                   | 91.0 | VLEDEFVTKWDLVPR               | ITRAQ4plex@N-term; ITRAQ4plex(T)@8; User modH on Lys(K)@9 | missed K-W@9                      | -0.07 | 2376.21 | 793.08   | 2376.28  | 793.10    | 3       | 49.9     |
| 64    | 37.9  | A0QRA5     | MSMEG_1046                   | 99.0 | DLVVSAGYAVLGR                 | ITRAQ4plex@N-term                                         |                                   | 0.04  | 1462.86 | 488.63   | 1462.83  | 488.62    | 3       |          |



Supplement Table 1A

| Index | % Cov | Uniprot ID | Gene locus<br>(M. smegmatis) | Conf | Peptide Sequence              | Modifications                                             | Cleavages          | ΔMass | Prec MW | Prec m/z | Calc. MW | Calc. m/z | Theor z | Area 115 |
|-------|-------|------------|------------------------------|------|-------------------------------|-----------------------------------------------------------|--------------------|-------|---------|----------|----------|-----------|---------|----------|
|       | 37.9  | A0QRA5     | MSMEG_1046                   | 99.0 | EQYDDVDYEQAVNMLESVGAEHLAER    | iTRAQ4plex@N-term                                         |                    | -0.04 | 3153.39 | 789.35   | 3153.43  | 789.37    | 4       | 50.9     |
|       | 37.9  | A0QRA5     | MSMEG_1046                   | 99.0 | VVASGLLTDVLTSENLSK            | iTRAQ4plex@N-term; iTRAQ4plex(S)@17; Lys->Gln@18          |                    | -0.03 | 2133.15 | 712.06   | 2133.18  | 712.07    | 3       | 25.0     |
|       | 37.9  | A0QRA5     | MSMEG_1046                   | 80.0 | EDLVAR                        | iTRAQ4plex@N-term                                         |                    | 0.00  | 845.47  | 423.74   | 845.47   | 423.74    | 2       | 60.3     |
| 65    | 37.9  | A0R719     | MSMEG_6933                   | 99.0 | EGITGPELMDQMR                 | iTRAQ4plex@N-term                                         |                    | 0.01  | 1619.79 | 810.90   | 1619.78  | 810.90    | 2       | 874.2    |
|       | 37.9  | A0R719     | MSMEG_6933                   | 99.0 | ITFLTNTTEITQIEGDPK            | iTRAQ4plex@N-term; Lys->Gln@17                            |                    | 0.02  | 2063.07 | 688.70   | 2063.05  | 688.69    | 3       | 16.3     |
|       | 37.9  | A0R719     | MSMEG_6933                   | 99.0 | TTYTSLDGVFAAGDLVDHTYR         | iTRAQ4plex@N-term; Dimethyl(R)@21                         |                    | -0.05 | 2473.18 | 825.40   | 2473.22  | 825.42    | 3       | 190.6    |
|       | 37.9  | A0R719     | MSMEG_6933                   | 99.0 | TVVVGDETHQAR                  | iTRAQ4plex@N-term                                         |                    | 0.02  | 1454.78 | 485.93   | 1454.76  | 485.93    | 3       | 389.6    |
|       | 37.9  | A0R719     | MSMEG_6933                   | 99.0 | TTYTSLDGVFAAGDLVDHTYR         | iTRAQ4plex@N-term                                         |                    | 0.01  | 2445.20 | 816.07   | 2445.19  | 816.07    | 3       | 205.6    |
|       | 37.9  | A0R719     | MSMEG_6933                   | 98.0 | TVVVGDETHQAR                  | Carbamyl@N-term                                           |                    | 0.08  | 1353.74 | 452.25   | 1353.66  | 452.23    | 3       | 80.2     |
|       | 37.9  | A0R719     | MSMEG_6933                   | 96.0 | HLGVPGEALTGMGVSTCATCDGFFFR    | iTRAQ4plex@N-term; No Pyridylethyl(C)@18; Cys->Thr@21     |                    | -0.08 | 2943.32 | 736.84   | 2943.40  | 736.86    | 4       | 73.7     |
|       | 37.9  | A0R719     | MSMEG_6933                   | 88.0 | TTYTSLDGVFAAGDLVDHTYR         | No iTRAQ4plex@N-term                                      |                    | 0.03  | 2301.12 | 768.05   | 2301.09  | 768.04    | 3       | 10.7     |
| 66    | 37.7  | A0QSL8     | MSMEG_1524                   | 99.0 | EGVHTVGELVAR                  | iTRAQ4plex@N-term                                         |                    | 0.01  | 1409.79 | 470.94   | 1409.77  | 470.93    | 3       | 199.2    |
|       | 37.7  | A0QSL8     | MSMEG_1524                   | 99.0 | ELNADSEHIEIGPSPAEDHIASFALPIDI | iTRAQ4plex@N-term                                         |                    | -0.03 | 4013.97 | 1004.50  | 4014.00  | 1004.51   | 4       | 59.7     |
|       | 37.7  | A0QSL8     | MSMEG_1524                   | 99.0 | IDGVLHEFTTVPGVK               | iTRAQ4plex@N-term; Lys->Gln@15                            |                    | -0.08 | 1754.85 | 585.96   | 1754.93  | 585.98    | 3       | 92.2     |
|       | 37.7  | A0QSL8     | MSMEG_1524                   | 99.0 | MLISQRPTLSEETVAENR            | iTRAQ4plex@N-term                                         |                    | -0.01 | 2217.14 | 740.06   | 2217.15  | 740.06    | 3       | 1,246.9  |
|       | 37.7  | A0QSL8     | MSMEG_1524                   | 99.0 | TESDLLDIR                     | iTRAQ4plex@N-term                                         |                    | -0.02 | 1204.62 | 603.32   | 1204.64  | 603.33    | 2       | 675.7    |
|       | 37.7  | A0QSL8     | MSMEG_1524                   | 99.0 | TLLSSIPGAAVSIR                | iTRAQ4plex@N-term                                         |                    | 0.03  | 1628.98 | 815.50   | 1628.96  | 815.49    | 2       | 1,410.0  |
|       | 37.7  | A0QSL8     | MSMEG_1524                   | 99.0 | EGVHTVGELVAR                  | iTRAQ4plex@N-term                                         |                    | -0.03 | 1409.75 | 470.92   | 1409.77  | 470.93    | 3       | 275.5    |
|       | 37.7  | A0QSL8     | MSMEG_1524                   | 96.0 | ASGAEIGR                      | iTRAQ4plex@N-term                                         |                    | 0.00  | 903.49  | 452.75   | 903.49   | 452.75    | 2       | 71.6     |
|       | 37.7  | A0QSL8     | MSMEG_1524                   | 96.0 | TESDLLDIR                     | Carbamyl@N-term                                           |                    | 0.04  | 1103.58 | 552.80   | 1103.55  | 552.78    | 2       | 2,162.7  |
| 67    | 37.0  | A0QZ46     | MSMEG_3894                   | 99.0 | FNEFDNLR                      | iTRAQ4plex@N-term                                         |                    | 0.01  | 1197.60 | 599.80   | 1197.59  | 599.80    | 2       | 7,533.8  |
|       | 37.0  | A0QZ46     | MSMEG_3894                   | 99.0 | GGIQFADTR                     | iTRAQ4plex@N-term; Dimethyl(R)@9                          |                    | -0.01 | 1135.60 | 568.81   | 1135.61  | 568.81    | 2       | 805.3    |
|       | 37.0  | A0QZ46     | MSMEG_3894                   | 99.0 | SFPYFISPEQAMR                 | iTRAQ4plex@N-term                                         | cleaved M-S@N-term | 0.01  | 1715.86 | 858.94   | 1715.85  | 858.93    | 2       | 2,150.3  |
|       | 37.0  | A0QZ46     | MSMEG_3894                   | 99.0 | GGIQFADTR                     | iTRAQ4plex@N-term                                         |                    | -0.02 | 1107.55 | 554.78   | 1107.58  | 554.80    | 2       | 10,533.9 |
|       | 37.0  | A0QZ46     | MSMEG_3894                   | 99.0 | GGIQFADTR                     | iTRAQ4plex@N-term; Thr->Glu@8                             |                    | 0.05  | 1135.63 | 568.82   | 1135.57  | 568.79    | 2       | 2,775.8  |
|       | 37.0  | A0QZ46     | MSMEG_3894                   | 87.0 | ITYDGSIADEPHFVVMGGTTEPIAALN   | iTRAQ4plex@N-term; Methyl(N)@28                           | cleaved N-E@C-term | -0.05 | 3088.50 | 1030.51  | 3088.55  | 1030.53   | 3       | 321.7    |
| 68    | 36.6  | A0R079     | MSMEG_4290                   | 99.0 | DGQPLFHDESGYAGLSDIAR          | iTRAQ4plex@N-term                                         |                    | 0.04  | 2291.13 | 764.72   | 2291.09  | 764.71    | 3       | 306.9    |
|       | 36.6  | A0R079     | MSMEG_4290                   | 99.0 | DQMATNLQNAAGFTLER             | iTRAQ4plex@N-term                                         |                    | -0.02 | 1951.93 | 651.65   | 1951.95  | 651.66    | 3       | 270.1    |
|       | 36.6  | A0R079     | MSMEG_4290                   | 99.0 | FNTLLAAADDVLLFK               | iTRAQ4plex@N-term; Lys->Arg@15                            |                    | 0.06  | 1822.07 | 912.04   | 1822.01  | 912.01    | 2       | 314.4    |
|       | 36.6  | A0R079     | MSMEG_4290                   | 99.0 | GFQSIHESDMMLLPDPNTAR          | iTRAQ4plex@N-term                                         |                    | 0.01  | 2402.16 | 801.73   | 2402.15  | 801.72    | 3       | 149.5    |
|       | 36.6  | A0R079     | MSMEG_4290                   | 99.0 | GGYFPVAPYDHYVDLR              | iTRAQ4plex@N-term                                         |                    | -0.03 | 2011.96 | 671.66   | 2011.99  | 671.67    | 3       | 132.1    |
|       | 36.6  | A0R079     | MSMEG_4290                   | 99.0 | LVPGYEAPINLVYSQR              | iTRAQ4plex@N-term                                         |                    | -0.01 | 1962.06 | 655.03   | 1962.07  | 655.03    | 3       | 286.0    |
|       | 36.6  | A0R079     | MSMEG_4290                   | 99.0 | SIPASAFDESDFEDGLAFDGGSSVR     | iTRAQ4plex@N-term                                         | cleaved F-S@N-term | -0.04 | 2646.21 | 883.08   | 2646.26  | 883.09    | 3       | 9.8      |
|       | 36.6  | A0R079     | MSMEG_4290                   | 97.0 | GFQSIHESDMMLLPDPNTAR          | iTRAQ4plex@N-term; Dimethyl(R)@20                         |                    | -0.03 | 2430.15 | 811.06   | 2430.18  | 811.07    | 3       | 20.5     |
|       | 36.6  | A0R079     | MSMEG_4290                   | 79.0 | TLMNMFVHDPFTR                 | iTRAQ4plex@N-term; Deamidated(N)@3                        |                    | 0.00  | 1882.92 | 628.65   | 1882.92  | 628.65    | 3       | 41.3     |
| 69    | 36.6  | A0R2E9     | MSMEG_5087                   | 99.0 | GLVPTGYVSQR                   | iTRAQ4plex@N-term                                         |                    | 0.01  | 1319.74 | 660.88   | 1319.73  | 660.87    | 2       | 1,074.7  |
|       | 36.6  | A0R2E9     | MSMEG_5087                   | 99.0 | GWTLVSGGGNVSAMGAVAQAAR        | iTRAQ4plex@N-term                                         |                    | -0.01 | 2203.12 | 735.38   | 2203.13  | 735.38    | 3       | 133.5    |
|       | 36.6  | A0R2E9     | MSMEG_5087                   | 99.0 | GLVPTGYVSQR                   | iTRAQ4plex@N-term                                         |                    | 0.01  | 1319.74 | 660.88   | 1319.73  | 660.87    | 2       | 817.1    |
| 70    | 36.4  | A0R061     | MSMEG_4272                   | 92.0 | YNLFFDDR                      | iTRAQ4plex@N-term                                         |                    | 0.02  | 1232.61 | 617.31   | 1232.59  | 617.30    | 2       | 956.0    |
| 71    | 36.4  | A0R729     | MSMEG_6759                   | 99.0 | ATLESICYQSR                   | iTRAQ4plex@N-term; Pyridylethyl(C)@7                      |                    | -0.01 | 1518.75 | 507.26   | 1518.76  | 507.26    | 3       | 966.4    |
|       | 36.4  | A0R729     | MSMEG_6759                   | 99.0 | DQMHWIDSAESESRLAR             | iTRAQ4plex@N-term                                         |                    | 0.00  | 2001.95 | 668.32   | 2001.95  | 668.33    | 3       | 286.4    |
|       | 36.4  | A0R729     | MSMEG_6759                   | 99.0 | DVAEAMEADSGVHLDVLK            | iTRAQ4plex@N-term; Lys->Gln@18                            |                    | 0.00  | 2041.98 | 681.67   | 2041.97  | 681.67    | 3       | 354.7    |
|       | 36.4  | A0R729     | MSMEG_6759                   | 99.0 | FMIFDHAGNEVAR                 | iTRAQ4plex@N-term                                         |                    | -0.01 | 1649.80 | 550.94   | 1649.81  | 550.94    | 3       | 449.4    |
|       | 36.4  | A0R729     | MSMEG_6759                   | 99.0 | GAIVGLSR                      | iTRAQ4plex@N-term                                         |                    | -0.01 | 915.55  | 458.78   | 915.56   | 458.79    | 2       | 4,524.5  |
|       | 36.4  | A0R729     | MSMEG_6759                   | 99.0 | IQWILENVPGVR                  | iTRAQ4plex@N-term                                         |                    | -0.06 | 1566.84 | 523.29   | 1566.90  | 523.31    | 3       | 54.0     |
|       | 36.4  | A0R729     | MSMEG_6759                   | 99.0 | LQPSDLAALGVNTQR               | iTRAQ4plex@N-term                                         |                    | -0.03 | 1725.92 | 576.32   | 1725.95  | 576.32    | 3       | 67.3     |
|       | 36.4  | A0R729     | MSMEG_6759                   | 99.0 | NTYGTGNLFLNTGTTTPVR           | iTRAQ4plex@N-term                                         |                    | -0.02 | 2182.13 | 728.38   | 2182.15  | 728.39    | 3       | 14.1     |
|       | 36.4  | A0R729     | MSMEG_6759                   | 99.0 | PGWVEHNPEIWER                 | No iTRAQ4plex@N-term                                      | cleaved R-P@N-term | -0.04 | 1746.80 | 583.28   | 1746.85  | 583.29    | 3       | 32.5     |
|       | 36.4  | A0R729     | MSMEG_6759                   | 99.0 | SSSAVQSALNAAK                 | iTRAQ4plex@N-term; Lys->Gln@13                            |                    | 0.05  | 1376.75 | 689.38   | 1376.70  | 689.36    | 2       | 1,684.8  |
|       | 36.4  | A0R729     | MSMEG_6759                   | 99.0 | TDSIAAALDR                    | iTRAQ4plex@N-term; Dimethyl(R)@10                         |                    | -0.01 | 1203.65 | 602.83   | 1203.66  | 602.84    | 2       | 457.5    |
|       | 36.4  | A0R729     | MSMEG_6759                   | 99.0 | YNTNAHLAR                     | iTRAQ4plex@N-term                                         |                    | 0.00  | 1202.63 | 401.88   | 1202.63  | 401.88    | 3       | 108.4    |
|       | 36.4  | A0R729     | MSMEG_6759                   | 89.0 | YNTNAHLAR                     | iTRAQ4plex@N-term                                         |                    | 0.00  | 1202.63 | 401.88   | 1202.63  | 401.88    | 3       | 327.1    |
| 72    | 36.4  | A0QUV7     | MSMEG_2352                   | 99.0 | GVGSAENFKIVEELADSLGGAVGAS     | iTRAQ4plex@N-term; iTRAQ4plex(S)@4; User modH on Lys(K)@9 | missed K-I@9       | 0.01  | 3063.60 | 766.91   | 3063.60  | 766.91    | 4       | 80.4     |

Supplement Table 1A

| Index | % Cov  | Uniprot ID | Gene locus<br>(M. smegmatis) | Conf                          | Peptide Sequence                                                       | Modifications                                    | Cleavages          | ΔMass              | Prec MW | Prec m/z | Calc. MW | Calc. m/z | Theor z | Area 115 |         |
|-------|--------|------------|------------------------------|-------------------------------|------------------------------------------------------------------------|--------------------------------------------------|--------------------|--------------------|---------|----------|----------|-----------|---------|----------|---------|
| 36.4  | A0QUV7 | MSMEG_2352 | 99.0                         | AAVDSGYYPGQFVQGQTGK           | ITRAQ4plex@N-term; Lys->Gln@19                                         |                                                  |                    | 0.03               | 2116.03 | 706.35   | 2116.00  | 706.34    | 3       | 83.6     |         |
| 36.4  | A0QUV7 | MSMEG_2352 | 99.0                         | ALGEPASVVVVGK                 | ITRAQ4plex@N-term; Lys->Gln@12                                         |                                                  | cleaved K-P@C-term | 0.04               | 1269.75 | 635.88   | 1269.71  | 635.86    | 2       | 927.2    |         |
| 36.4  | A0QUV7 | MSMEG_2352 | 99.0                         | EPAVAGDRPELTEASVVAGGR         | ITRAQ4plex@N-term                                                      |                                                  |                    | 0.02               | 2323.25 | 775.42   | 2323.23  | 775.42    | 3       | 739.7    |         |
| 36.4  | A0QUV7 | MSMEG_2352 | 99.0                         | IVEELADSLGGAVGASR             | ITRAQ4plex@N-term; Ser->Asp@16                                         |                                                  |                    | 0.04               | 1814.99 | 606.00   | 1814.95  | 605.99    | 3       | 82.6     |         |
| 36.4  | A0QUV7 | MSMEG_2352 | 99.0                         | REPAVAGDRPELTEASVVAGGR        | ITRAQ4plex@N-term                                                      |                                                  | missed R-E@1       | 0.02               | 2479.35 | 620.85   | 2479.33  | 620.84    | 4       | 79.8     |         |
| 36.4  | A0QUV7 | MSMEG_2352 | 99.0                         | VSAELLTAAR                    | ITRAQ4plex@N-term                                                      |                                                  |                    | 0.00               | 1173.69 | 587.85   | 1173.68  | 587.85    | 2       | 11.685.5 |         |
| 36.4  | A0QUV7 | MSMEG_2352 | 99.0                         | AAVDSGYYPGQFVQGQTGK           | ITRAQ4plex@N-term; ITRAQ4plex(T)@17; Lys->Gln@19                       |                                                  |                    | 0.07               | 2260.17 | 754.40   | 2260.10  | 754.37    | 3       | 724.6    |         |
| 36.4  | A0QUV7 | MSMEG_2352 | 99.0                         | IVEELADSLGGAVGASR             | ITRAQ4plex@N-term                                                      |                                                  |                    | 0.00               | 1786.95 | 894.48   | 1786.95  | 894.48    | 2       | 1.597.9  |         |
| 36.4  | A0QUV7 | MSMEG_2352 | 98.0                         | VSAELLTAAR                    | ITRAQ4plex@N-term; Ala->Val@9                                          |                                                  |                    | -0.02              | 1201.70 | 601.86   | 1201.72  | 601.86    | 2       | 1.013.8  |         |
| 36.4  | A0QUV7 | MSMEG_2352 | 96.0                         | GVGSAENFKIVEELADSLGGAVGAS     | ITRAQ4plex@N-term; ITRAQ4plex(S)@4; User modH on Lys(K)@9; Glu->Gln@13 |                                                  | missed K-I@9       | -0.11              | 3062.50 | 766.63   | 3062.61  | 766.66    | 4       | 8.7      |         |
| 36.4  | A0QUV7 | MSMEG_2352 | 90.0                         | GVGSAENFK                     | ITRAQ4plex@N-term; Lys->Gln@9                                          |                                                  |                    | 0.07               | 1051.58 | 526.80   | 1051.51  | 526.76    | 2       | 823.9    |         |
| 36.4  | A0QUV7 | MSMEG_2352 | 81.0                         | VSPQLTEAVKAR                  | No ITRAQ4plex@N-term; Lys->Ser@10; Arg->Orn(R)@12                      |                                                  | missed K-A@10      | 0.05               | 1214.71 | 608.36   | 1214.65  | 608.33    | 2       | 440.8    |         |
| 73    | 36.3   | A0QTE1     | MSMEG_1807                   | 99.0                          | AASGDAVTAPMGQTVVK                                                      | ITRAQ4plex@N-term; ITRAQ4plex(T)@14; Lys->Gln@17 |                    |                    | 0.08    | 1890.05  | 631.02   | 1889.98   | 631.00  | 3        | 406.9   |
| 36.3  | A0QTE1 | MSMEG_1807 | 99.0                         | AVVSDPAFIGDGEK                | ITRAQ4plex@N-term; Lys->Gln@14                                         |                                                  |                    | 0.05               | 1547.81 | 774.91   | 1547.76  | 774.89    | 2       | 764.4    |         |
| 36.3  | A0QTE1 | MSMEG_1807 | 99.0                         | AVVSDPAFIGDGEKFDVHTR          | ITRAQ4plex@N-term; Lys->Gln@14                                         |                                                  | missed K-F@14      | 0.04               | 2303.17 | 576.80   | 2303.13  | 576.79    | 4       | 223.5    |         |
| 36.3  | A0QTE1 | MSMEG_1807 | 99.0                         | EAJAAFGR                      | ITRAQ4plex@N-term                                                      |                                                  |                    | -0.02              | 977.52  | 489.77   | 977.54   | 489.78    | 2       | 3.270.3  |         |
| 36.3  | A0QTE1 | MSMEG_1807 | 99.0                         | FVAFTPGGVR                    | ITRAQ4plex@N-term                                                      |                                                  |                    | 0.00               | 1143.65 | 572.83   | 1143.65  | 572.83    | 2       | 9.342.2  |         |
| 36.3  | A0QTE1 | MSMEG_1807 | 99.0                         | LIVTGATR                      | ITRAQ4plex@N-term                                                      |                                                  |                    | -0.02              | 973.58  | 487.80   | 973.60   | 487.81    | 2       | 9.426.7  |         |
| 36.3  | A0QTE1 | MSMEG_1807 | 99.0                         | LQVEHPVTEETSGLDLVR            | ITRAQ4plex@N-term; Dimethyl(R)@18                                      |                                                  |                    | 0.01               | 2193.19 | 732.07   | 2193.18  | 732.07    | 3       | 82.1     |         |
| 36.3  | A0QTE1 | MSMEG_1807 | 99.0                         | LVEEAPAPFLTDAQR               | ITRAQ4plex@N-term                                                      |                                                  |                    | 0.01               | 1799.97 | 601.00   | 1799.95  | 600.99    | 3       | 228.1    |         |
| 36.3  | A0QTE1 | MSMEG_1807 | 99.0                         | MDSGVETGSVGGQFDSMLAK          | ITRAQ4plex@N-term; Lys->Gln@21                                         |                                                  |                    | -0.01              | 2272.04 | 758.35   | 2272.05  | 758.36    | 3       | 12.0     |         |
| 36.3  | A0QTE1 | MSMEG_1807 | 99.0                         | QTVVVEVGGR                    | ITRAQ4plex@N-term                                                      |                                                  |                    | 0.00               | 1186.67 | 594.34   | 1186.68  | 594.35    | 2       | 4.256.4  |         |
| 36.3  | A0QTE1 | MSMEG_1807 | 99.0                         | RLEVSLPGDLAIGGGGAAAPGVVR      | ITRAQ4plex@N-term                                                      |                                                  | missed R-L@1       | 0.01               | 2432.37 | 811.80   | 2432.36  | 811.79    | 3       | 261.4    |         |
| 36.3  | A0QTE1 | MSMEG_1807 | 99.0                         | LQVEHPVTEETSGLDLVR            | ITRAQ4plex@N-term                                                      |                                                  |                    | -0.02              | 2165.12 | 722.71   | 2165.14  | 722.72    | 3       | 417.1    |         |
| 36.3  | A0QTE1 | MSMEG_1807 | 99.0                         | LVEEAPAPFLTDAQR               | ITRAQ4plex@N-term; Gln->Arg@14                                         |                                                  |                    | 0.00               | 1827.99 | 610.34   | 1828.00  | 610.34    | 3       | 333.4    |         |
| 36.3  | A0QTE1 | MSMEG_1807 | 84.0                         | GEIAVR                        | ITRAQ4plex@N-term                                                      |                                                  |                    | -0.01              | 787.46  | 394.74   | 787.47   | 394.74    | 2       | 92.0     |         |
| 74    | 36.3   | A0QZ96     | MSMEG_3945                   | 99.0                          | ALEFAFDAASR                                                            | ITRAQ4plex@N-term                                |                    |                    | -0.02   | 1340.66  | 671.34   | 1340.68   | 671.35  | 2        | 437.5   |
| 36.3  | A0QZ96 | MSMEG_3945 | 99.0                         | ASAIATTAPVVVGVGSPASEK         | ITRAQ4plex@N-term; ITRAQ4plex(S)@20; Lys->Gln@22                       |                                                  |                    | 0.06               | 2314.29 | 772.44   | 2314.23  | 772.42    | 3       | 1.363.3  |         |
| 36.3  | A0QZ96 | MSMEG_3945 | 99.0                         | GAPLLAVHAWSDANVAGYPGVR        | ITRAQ4plex@N-term                                                      |                                                  |                    | -0.02              | 2364.23 | 789.08   | 2364.25  | 789.09    | 3       | 95.5     |         |
| 36.3  | A0QZ96 | MSMEG_3945 | 99.0                         | LLGSVTAGLIR                   | ITRAQ4plex@N-term                                                      |                                                  |                    | -0.02              | 1242.76 | 622.39   | 1242.78  | 622.40    | 2       | 848.9    |         |
| 36.3  | A0QZ96 | MSMEG_3945 | 99.0                         | SEIAQLTVVGSNGR                | ITRAQ4plex@N-term                                                      |                                                  |                    | -0.01              | 1596.86 | 533.29   | 1596.87  | 533.30    | 3       | 609.5    |         |
| 36.3  | A0QZ96 | MSMEG_3945 | 99.0                         | VQAEELSER                     | ITRAQ4plex@N-term                                                      |                                                  |                    | 0.00               | 1290.65 | 646.33   | 1290.65  | 646.33    | 2       | 1.113.7  |         |
| 75    | 36.0   | A0QVL0     | MSMEG_2611                   | 99.0                          | DWDDTASLVASDHR                                                         | ITRAQ4plex@N-term                                |                    |                    | 0.01    | 1730.81  | 577.94   | 1730.80   | 577.94  | 3        | 699.1   |
| 36.0  | A0QVL0 | MSMEG_2611 | 99.0                         | IDPIAAGGEDYRR                 | ITRAQ4plex@N-term                                                      |                                                  | missed R-R@12      | 0.03               | 1575.84 | 526.29   | 1575.81  | 526.28    | 3       | 1.349.5  |         |
| 36.0  | A0QVL0 | MSMEG_2611 | 99.0                         | SDPNITVYSSHTR                 | ITRAQ4plex@N-term                                                      |                                                  |                    | 0.04               | 1619.85 | 540.96   | 1619.80  | 540.94    | 3       | 1.269.9  |         |
| 36.0  | A0QVL0 | MSMEG_2611 | 99.0                         | SLGQTAQEIAR                   | ITRAQ4plex@N-term                                                      |                                                  | cleaved M-S@N-term | 0.01               | 1316.73 | 659.37   | 1316.72  | 659.37    | 2       | 2.947.9  |         |
| 36.0  | A0QVL0 | MSMEG_2611 | 99.0                         | THENVIGSHQDGR                 | No ITRAQ4plex@N-term                                                   |                                                  |                    | 0.05               | 1563.75 | 522.26   | 1563.70  | 522.24    | 3       |          |         |
| 36.0  | A0QVL0 | MSMEG_2611 | 99.0                         | VPNGDLLDAELAGVEVDEDGR         | ITRAQ4plex@N-term; Deamidated(N)@3; Glu->Gln@10                        |                                                  |                    | 0.05               | 2326.19 | 776.40   | 2326.14  | 776.39    | 3       | 10.9     |         |
| 36.0  | A0QVL0 | MSMEG_2611 | 97.0                         | LLGAHILGHQASSIIQPLIQAM        | ITRAQ4plex@N-term                                                      |                                                  | cleaved M-S@C-term | -0.01              | 2454.38 | 819.14   | 2454.39  | 819.14    | 3       | 41.3     |         |
| 36.0  | A0QVL0 | MSMEG_2611 | 94.0                         | GVFALGDVSSDYQLK               | ITRAQ4plex@N-term; Lys->Gln@15                                         |                                                  |                    | 0.06               | 1741.93 | 581.65   | 1741.86  | 581.63    | 3       | 21.7     |         |
| 36.0  | A0QVL0 | MSMEG_2611 | 94.0                         | VIVDQYQR                      | ITRAQ4plex@N-term                                                      |                                                  |                    | 0.00               | 1163.64 | 582.83   | 1163.64  | 582.83    | 2       | 1.652.9  |         |
| 36.0  | A0QVL0 | MSMEG_2611 | 81.0                         | GVFALGDVSSDYQLK               | ITRAQ4plex@N-term; ITRAQ4plex(Y)@12; Lys->Gln@15                       |                                                  |                    | 0.00               | 1885.97 | 629.66   | 1885.97  | 629.66    | 3       | 120.3    |         |
| 76    | 35.0   | A0QX83     | MSMEG_3207                   | 99.0                          | FGDAFIPMDES LAHAADVSGR                                                 | ITRAQ4plex@N-term                                |                    | cleaved R-P@C-term | 0.00    | 2448.18  | 817.07   | 2448.19   | 817.07  | 3        | 567.4   |
| 35.0  | A0QX83 | MSMEG_3207 | 99.0                         | QAVEYDAR                      | ITRAQ4plex@N-term                                                      |                                                  |                    | 0.00               | 1094.54 | 548.28   | 1094.55  | 548.28    | 2       | 692.0    |         |
| 35.0  | A0QX83 | MSMEG_3207 | 99.0                         | FGDAFIPMDES LAHAADVSGR        | ITRAQ4plex@N-term                                                      |                                                  | cleaved R-P@C-term | 0.05               | 2448.23 | 817.09   | 2448.19  | 817.07    | 3       | 247.0    |         |
| 35.0  | A0QX83 | MSMEG_3207 | 97.0                         | GDIEIEGHHTVEDTAIVLGGALGQALGDI | ITRAQ4plex@N-term; Lys->Gln@29                                         |                                                  |                    | 0.10               | 3129.67 | 783.43   | 3129.57  | 783.40    | 4       | 7.6      |         |
| 77    | 34.6   | A0R5C5     | MSMEG_6142                   | 99.0                          | FNVGTGVETSTR                                                           | ITRAQ4plex@N-term                                |                    |                    | -0.01   | 1410.71  | 706.36   | 1410.72   | 706.37  | 2        | 2.164.3 |
| 34.6  | A0R5C5 | MSMEG_6142 | 99.0                         | LLADGHGVVGLDDLSSGR            | ITRAQ4plex@N-term                                                      |                                                  |                    | -0.02              | 1923.99 | 642.34   | 1924.01  | 642.35    | 3       | 232.5    |         |
| 34.6  | A0R5C5 | MSMEG_6142 | 99.0                         | SVDDPPFDATVNVVGTVR            | ITRAQ4plex@N-term                                                      |                                                  |                    | 0.04               | 2031.08 | 678.04   | 2031.04  | 678.02    | 3       |          |         |
| 34.6  | A0R5C5 | MSMEG_6142 | 97.0                         | SVDDPPFDATVNVVGTVR            | ITRAQ4plex@N-term                                                      |                                                  |                    | 0.07               | 2031.11 | 678.04   | 2031.04  | 678.02    | 3       |          |         |
| 78    | 34.6   | A0QVE0     | MSMEG_2541                   | 99.0                          | NSDLGVNPSNDGNIR                                                        | ITRAQ4plex@N-term                                |                    |                    | 0.04    | 1827.96  | 914.99   | 1827.92   | 914.97  | 2        | 582.8   |
| 34.6  | A0QVE0 | MSMEG_2541 | 99.0                         | VAIPQLTEER                    | ITRAQ4plex@N-term                                                      |                                                  |                    | 0.00               | 1298.73 | 650.37   | 1298.73  | 650.37    | 2       | 1.900.4  |         |
| 34.6  | A0QVE0 | MSMEG_2541 | 80.0                         | DELGSIR                       | ITRAQ4plex@N-term                                                      |                                                  |                    | 0.01               | 932.52  | 467.27   | 932.50   | 467.26    | 2       | 2.063.5  |         |
| 79    | 34.5   | A0R342     | MSMEG_5335                   | 99.0                          | ALIATDPPDR                                                             | ITRAQ4plex@N-term                                |                    |                    | 0.01    | 1114.62  | 558.32   | 1114.61   | 558.31  | 2        | 5.219.0 |

Supplement Table 1A

| Index | % Cov | Uniprot ID | Gene locus<br>(M. smegmatis) | Conf | Peptide Sequence           | Modifications                                                     | Cleavages          | ΔMass | Prec MW | Prec m/z | Calc. MW | Calc. m/z | Theor z | Area 115 |
|-------|-------|------------|------------------------------|------|----------------------------|-------------------------------------------------------------------|--------------------|-------|---------|----------|----------|-----------|---------|----------|
|       | 34.5  | A0R342     | MSMEG_5335                   | 99.0 | AYMDATMAYR                 | iTRAQ4plex@N-term                                                 | cleaved N-A@N-term | 0.01  | 1335.62 | 668.82   | 1335.61  | 668.81    | 2       | 965.3    |
|       | 34.5  | A0R342     | MSMEG_5335                   | 99.0 | EWTGQIGNNSANDVR            | iTRAQ4plex@N-term                                                 |                    | 0.01  | 2033.92 | 678.98   | 2033.92  | 678.98    | 3       | 412.0    |
|       | 34.5  | A0R342     | MSMEG_5335                   | 99.0 | GGMETYGVTTNPIFMPGR         | iTRAQ4plex@N-term; Dimethyl(R)@18                                 |                    | 0.05  | 2099.08 | 700.70   | 2099.03  | 700.68    | 3       | 74.5     |
|       | 34.5  | A0R342     | MSMEG_5335                   | 99.0 | NACLNIAEYLK                | iTRAQ4plex@N-term; Pyridylethyl(C)@3; Lys->Gln@11                 |                    | 0.01  | 1499.77 | 500.93   | 1499.76  | 500.93    | 3       | 429.6    |
|       | 34.5  | A0R342     | MSMEG_5335                   | 99.0 | NAYMDATMAYR                | iTRAQ4plex@N-term                                                 |                    | 0.00  | 1449.65 | 725.83   | 1449.65  | 725.83    | 2       | 9.520.8  |
|       | 34.5  | A0R342     | MSMEG_5335                   | 99.0 | PEVVSVDHDK                 | No iTRAQ4plex@N-term; iTRAQ4plex(S)@10; Lys->Gln@11               | cleaved M-P@N-term | 0.03  | 1386.72 | 463.25   | 1386.69  | 463.24    | 3       | 456.5    |
|       | 34.5  | A0R342     | MSMEG_5335                   | 99.0 | VNGGGFLTDYYPDAYK           | iTRAQ4plex@N-term; iTRAQ4plex(Y)@15; Lys->Gln@16                  |                    | 0.06  | 2067.04 | 690.02   | 2066.98  | 690.00    | 3       | 222.3    |
|       | 34.5  | A0R342     | MSMEG_5335                   | 99.0 | WGYTGEQAYLILGTSPIEGR       | iTRAQ4plex@N-term                                                 |                    | 0.01  | 2354.21 | 785.74   | 2354.20  | 785.74    | 3       | 22.8     |
|       | 34.5  | A0R342     | MSMEG_5335                   | 99.0 | YTGITHPGLFGTAPSPDLLAK      | iTRAQ4plex@N-term; iTRAQ4plex(S)@15; Lys->Gln@21                  |                    | 0.05  | 2443.35 | 815.46   | 2443.30  | 815.44    | 3       | 572.0    |
|       | 34.5  | A0R342     | MSMEG_5335                   | 99.0 | EWTGQIGNNSANDVR            | iTRAQ4plex@N-term; Dimethyl(R)@17                                 |                    | -0.01 | 2061.93 | 688.32   | 2061.95  | 688.32    | 3       | 493.8    |
|       | 34.5  | A0R342     | MSMEG_5335                   | 99.0 | GGMETYGVTTNPIFMPGR         | iTRAQ4plex@N-term                                                 |                    | -0.01 | 2070.99 | 691.34   | 2071.00  | 691.34    | 3       | 204.3    |
|       | 34.5  | A0R342     | MSMEG_5335                   | 99.0 | NAYMDATMAYR                | iTRAQ4plex@N-term                                                 |                    | 0.00  | 1449.65 | 725.83   | 1449.65  | 725.83    | 2       | 995.2    |
|       | 34.5  | A0R342     | MSMEG_5335                   | 99.0 | NAYMDATMAYR                | iTRAQ4plex@N-term; Dimethyl(R)@11                                 |                    | 0.02  | 1477.70 | 739.86   | 1477.68  | 739.85    | 2       | 1.482.5  |
|       | 34.5  | A0R342     | MSMEG_5335                   | 99.0 | PEVVSVDHDK                 | No iTRAQ4plex@N-term; iTRAQ4plex(S)@10; Lys->Gln@11               | cleaved M-P@N-term | 0.02  | 1386.71 | 463.24   | 1386.69  | 463.24    | 3       | 192.1    |
|       | 34.5  | A0R342     | MSMEG_5335                   | 99.0 | WGYTGEQAYLILGTSPIEGR       | iTRAQ4plex@N-term; Amino(Y)@9                                     |                    | -0.09 | 2369.13 | 790.72   | 2369.21  | 790.75    | 3       | 20.7     |
|       | 34.5  | A0R342     | MSMEG_5335                   | 99.0 | YTGITHPGLFGTAPSPDLLAK      | iTRAQ4plex@N-term; Lys->Gln@21                                    |                    | 0.00  | 2299.19 | 767.40   | 2299.20  | 767.41    | 3       | 414.6    |
|       | 34.5  | A0R342     | MSMEG_5335                   | 98.0 | PEVVSVDHDK                 | No iTRAQ4plex@N-term; Lys->Gln@11                                 | cleaved M-P@N-term | 0.02  | 1242.61 | 415.21   | 1242.59  | 415.20    | 3       | 52.2     |
|       | 34.5  | A0R342     | MSMEG_5335                   | 96.0 | VNGGGFLTDYYPDAYK           | iTRAQ4plex@N-term; Deamidated(N)@2; iTRAQ4plex(Y)@15; Lys->Gln@16 |                    | 0.00  | 2067.97 | 690.33   | 2067.97  | 690.33    | 3       | 213.1    |
|       | 34.5  | A0R342     | MSMEG_5335                   | 85.0 | PEVVSVDHDK                 | iTRAQ4plex@N-term; Lys->Gln@11                                    | cleaved M-P@N-term | 0.03  | 1386.72 | 463.25   | 1386.69  | 463.24    | 3       | 277.0    |
| 80    | 34.3  | A0QVB8     | MSMEG_2519                   | 99.0 | EHIAVGEAR                  | iTRAQ4plex@N-term                                                 |                    | 0.01  | 1124.62 | 375.88   | 1124.61  | 375.88    | 3       | 27.2     |
|       | 34.3  | A0QVB8     | MSMEG_2519                   | 99.0 | ETVAHGGTVLFGVTK            | iTRAQ4plex@N-term; iTRAQ4plex(T)@14; Lys->Gln@15                  |                    | 0.07  | 1803.04 | 602.02   | 1802.98  | 602.00    | 3       | 174.8    |
|       | 34.3  | A0QVB8     | MSMEG_2519                   | 99.0 | QAESIAEEATR                | iTRAQ4plex@N-term                                                 |                    | 0.03  | 1475.76 | 738.89   | 1475.73  | 738.87    | 2       | 1.953.7  |
|       | 34.3  | A0QVB8     | MSMEG_2519                   | 99.0 | VIASAVAEGQLAR              | iTRAQ4plex@N-term                                                 |                    | 0.00  | 1427.82 | 714.92   | 1427.82  | 714.92    | 2       | 3.470.1  |
|       | 34.3  | A0QVB8     | MSMEG_2519                   | 99.0 | VPSAVVVDTNK                | iTRAQ4plex@N-term; Lys->Gln@12                                    |                    | 0.03  | 1457.79 | 729.90   | 1457.76  | 729.89    | 2       | 1.110.7  |
|       | 34.3  | A0QVB8     | MSMEG_2519                   | 99.0 | WLGGMILNFSVHK              | iTRAQ4plex@N-term; Lys->Gln@14                                    |                    | 0.02  | 1733.89 | 578.97   | 1733.87  | 578.96    | 3       | 75.6     |
|       | 34.3  | A0QVB8     | MSMEG_2519                   | 94.0 | EILMLTR                    | iTRAQ4plex@N-term                                                 |                    | 0.01  | 1018.60 | 510.31   | 1018.60  | 510.31    | 2       | 4.883.7  |
| 81    | 34.3  | A0QWS8     | MSMEG_3050                   | 99.0 | AQEIMTELEIAPTR             | iTRAQ4plex@N-term                                                 |                    | 0.01  | 1744.92 | 873.47   | 1744.92  | 873.46    | 2       | 2.041.1  |
|       | 34.3  | A0QWS8     | MSMEG_3050                   | 99.0 | AQEIMTELEIAPTR             | iTRAQ4plex@N-term; Dimethyl(R)@14                                 |                    | -0.01 | 1772.93 | 591.99   | 1772.95  | 591.99    | 3       |          |
| 82    | 33.4  | A0QYY6     | MSMEG_3833                   | 99.0 | ATQEDPWR                   | iTRAQ4plex@N-term                                                 |                    | 0.01  | 1145.57 | 573.79   | 1145.56  | 573.79    | 2       | 1.861.7  |
|       | 33.4  | A0QYY6     | MSMEG_3833                   | 99.0 | FAAAEAEANAPVSNVSSR         | iTRAQ4plex@N-term; Deamidated(N)@15                               |                    | -0.01 | 1963.93 | 655.65   | 1963.94  | 655.65    | 3       | 1.396.0  |
|       | 33.4  | A0QYY6     | MSMEG_3833                   | 99.0 | GFLPASLVEMR                | iTRAQ4plex@N-term                                                 |                    | 0.00  | 1362.74 | 682.38   | 1362.75  | 682.38    | 2       | 1.007.2  |
|       | 33.4  | A0QYY6     | MSMEG_3833                   | 99.0 | LVPFGAFVR                  | iTRAQ4plex@N-term                                                 |                    | -0.02 | 1148.66 | 575.34   | 1148.68  | 575.35    | 2       | 4.469.4  |
|       | 33.4  | A0QYY6     | MSMEG_3833                   | 99.0 | VEEGIEGLVHISELSER          | iTRAQ4plex@N-term                                                 |                    | -0.05 | 2039.02 | 680.68   | 2039.07  | 680.70    | 3       | 169.8    |
|       | 33.4  | A0QYY6     | MSMEG_3833                   | 99.0 | FAAAEAEANAPVSNVSSR         | iTRAQ4plex@N-term                                                 |                    | 0.01  | 1962.96 | 655.33   | 1962.95  | 655.32    | 3       | 1.586.3  |
|       | 33.4  | A0QYY6     | MSMEG_3833                   | 99.0 | GFLPASLVEMR                | iTRAQ4plex@N-term                                                 |                    | -0.01 | 1362.74 | 682.38   | 1362.75  | 682.38    | 2       | 448.3    |
|       | 33.4  | A0QYY6     | MSMEG_3833                   | 99.0 | VEEGIEGLVHISELSER          | iTRAQ4plex@N-term; Dimethyl(R)@17                                 |                    | -0.05 | 2067.05 | 690.02   | 2067.10  | 690.04    | 3       | 120.0    |
|       | 33.4  | A0QYY6     | MSMEG_3833                   | 98.0 | GGILDIGLR                  | iTRAQ4plex@N-term                                                 |                    | 0.01  | 1169.73 | 585.87   | 1169.73  | 585.87    | 2       | 126.7    |
|       | 33.4  | A0QYY6     | MSMEG_3833                   | 98.0 | GFLPASLVEMR                | iTRAQ4plex@N-term; Dimethyl(R)@11                                 |                    | -0.02 | 1390.76 | 696.39   | 1390.78  | 696.40    | 2       | 147.1    |
|       | 33.4  | A0QYY6     | MSMEG_3833                   | 98.0 | LVPFGAFVR                  | iTRAQ4plex@N-term                                                 |                    | -0.03 | 1148.65 | 575.33   | 1148.68  | 575.35    | 2       | 1.285.1  |
|       | 33.4  | A0QYY6     | MSMEG_3833                   | 97.0 | DLQPYIGK                   | iTRAQ4plex@N-term; Lys->Gln@8                                     |                    | 0.02  | 1076.58 | 539.30   | 1076.56  | 539.29    | 2       | 1.505.8  |
|       | 33.4  | A0QYY6     | MSMEG_3833                   | 93.0 | TEGVIPSR                   | iTRAQ4plex@N-term                                                 |                    | 0.01  | 1001.57 | 501.79   | 1001.56  | 501.79    | 2       | 2.980.1  |
|       | 33.4  | A0QYY6     | MSMEG_3833                   | 91.0 | SEESSGGTLASDAQLAALR        | iTRAQ4plex@N-term                                                 |                    | 0.03  | 2006.03 | 669.68   | 2006.00  | 669.68    | 3       |          |
|       | 33.4  | A0QYY6     | MSMEG_3833                   | 88.0 | VIDIDLER                   | iTRAQ4plex@N-term                                                 |                    | -0.01 | 1115.62 | 558.82   | 1115.63  | 558.82    | 2       | 1.567.2  |
|       | 33.4  | A0QYY6     | MSMEG_3833                   | 84.0 | YFNDGDIVETIVK              | iTRAQ4plex@N-term; iTRAQ4plex(T)@11; Lys->Gln@14                  |                    | -0.01 | 1856.93 | 619.98   | 1856.94  | 619.99    | 3       | 202.3    |
| 83    | 32.6  | A0QSD8     | MSMEG_1443                   | 98.0 | GIASGGTSVSFGDYGIALEHAYITNR | iTRAQ4plex@N-term                                                 |                    | -0.02 | 2927.43 | 732.87   | 2927.45  | 732.87    | 4       | 91.9     |
|       | 32.6  | A0QSD8     | MSMEG_1443                   | 96.0 | VWINIFDRPLTK               | iTRAQ4plex@N-term; Lys->Gln@13                                    |                    | 0.01  | 1741.97 | 581.66   | 1741.96  | 581.66    | 3       | 33.5     |
| 84    | 31.9  | A0QQC1     | MSMEG_0702                   | 99.0 | LGMTVTSATFR                | iTRAQ4plex@N-term                                                 |                    | 0.00  | 1326.71 | 664.36   | 1326.71  | 664.36    | 2       | 2.996.0  |
|       | 31.9  | A0QQC1     | MSMEG_0702                   | 99.0 | LGYSAFFR                   | iTRAQ4plex@N-term                                                 |                    | -0.02 | 1103.56 | 552.79   | 1103.59  | 552.80    | 2       | 2.088.5  |
|       | 31.9  | A0QQC1     | MSMEG_0702                   | 99.0 | MAGDGLPGPTDSWVTLGAIAR      | iTRAQ4plex@N-term                                                 |                    | -0.02 | 2228.12 | 743.71   | 2228.14  | 743.72    | 3       | 231.3    |
|       | 31.9  | A0QQC1     | MSMEG_0702                   | 99.0 | VAAAVEGAGR                 | iTRAQ4plex@N-term                                                 |                    | 0.03  | 1043.61 | 522.81   | 1043.58  | 522.80    | 2       | 2.360.4  |
|       | 31.9  | A0QQC1     | MSMEG_0702                   | 99.0 | YGPPLAISVAQVDEMSGGR        | iTRAQ4plex@N-term                                                 |                    | -0.02 | 2090.04 | 697.69   | 2090.06  | 697.69    | 3       | 164.6    |
|       | 31.9  | A0QQC1     | MSMEG_0702                   | 91.0 | LGPFFIEAGVQR               | iTRAQ4plex@N-term                                                 |                    | 0.01  | 1329.76 | 665.89   | 1329.75  | 665.88    | 2       | 405.6    |
| 85    | 31.8  | A0QSG4     | MSMEG_1470                   | 99.0 | AEDGAIIVTRPDDER            | iTRAQ4plex@N-term                                                 |                    | 0.07  | 1785.97 | 596.33   | 1785.90  | 596.31    | 3       | 1.324.4  |
|       | 31.8  | A0QSG4     | MSMEG_1470                   | 99.0 | AEDGAIIVTRPDDERR           | iTRAQ4plex@N-term                                                 | missed R-R@15      | 0.02  | 1942.02 | 486.51   | 1942.00  | 486.51    | 4       | 135.2    |
|       | 31.8  | A0QSG4     | MSMEG_1470                   | 99.0 | TLIANLVTVTEGYTQK           | iTRAQ4plex@N-term; Lys->Gln@17                                    |                    | 0.03  | 1951.07 | 651.36   | 1951.04  | 651.35    | 3       |          |

Supplement Table 1A

| Index | % Cov | Uniprot ID | Gene locus<br>(M. smegmatis) | Conf       | Peptide Sequence             | Modifications                                                | Cleavages          | ΔMass             | Prec MW       | Prec m/z | Calc. MW | Calc. m/z | Theor z | Area 115 |
|-------|-------|------------|------------------------------|------------|------------------------------|--------------------------------------------------------------|--------------------|-------------------|---------------|----------|----------|-----------|---------|----------|
|       | 31.8  | A0QSG4     | MSMEG_1470                   | 98.0       | VQISAVIR                     | ITRAQ4plex@N-term                                            | cleaved M-E@N-term | 0.01              | 1085.67       | 543.84   | 1085.67  | 543.84    | 2       | 1,315.8  |
|       | 31.8  | A0QSG4     | MSMEG_1470                   | 96.0       | EIFGVGYR                     | ITRAQ4plex@N-term                                            |                    | -0.02             | 1083.56       | 542.79   | 1083.58  | 542.80    | 2       | 2,555.5  |
| 86    | 31.2  | A0R3L1     | MSMEG_5512                   | 99.0       | AADSGDDLPEVWR                | ITRAQ4plex@N-term                                            | cleaved V-V@N-term | 0.01              | 1573.76       | 787.89   | 1573.75  | 787.88    | 2       | 132.5    |
|       | 31.2  | A0R3L1     | MSMEG_5512                   | 99.0       | ALIAGHDVLLGER                | ITRAQ4plex@N-term                                            |                    | 0.00              | 1605.94       | 536.32   | 1605.93  | 536.32    | 3       | 554.2    |
|       | 31.2  | A0R3L1     | MSMEG_5512                   | 99.0       | ENLLAALAER                   | ITRAQ4plex@N-term                                            |                    | 0.00              | 1242.71       | 622.36   | 1242.71  | 622.36    | 2       | 875.6    |
|       | 31.2  | A0R3L1     | MSMEG_5512                   | 99.0       | EQAVLEHLR                    | ITRAQ4plex@N-term; Dimethyl(R)@10                            |                    | -0.02             | 1378.78       | 460.60   | 1378.81  | 460.61    | 3       | 47.7     |
|       | 31.2  | A0R3L1     | MSMEG_5512                   | 99.0       | VDLGTVIDVLR                  | ITRAQ4plex@N-term                                            |                    | -0.01             | 1342.78       | 672.40   | 1342.79  | 672.40    | 2       | 171.2    |
|       | 31.2  | A0R3L1     | MSMEG_5512                   | 99.0       | VVDLGTVIDVLR                 | ITRAQ4plex@N-term                                            |                    | -0.02             | 1441.84       | 721.93   | 1441.86  | 721.94    | 2       | 361.6    |
|       | 31.2  | A0R3L1     | MSMEG_5512                   | 99.0       | EQAVLEHLR                    | ITRAQ4plex@N-term                                            |                    | -0.03             | 1350.74       | 451.25   | 1350.77  | 451.27    | 3       | 111.3    |
|       | 31.2  | A0R3L1     | MSMEG_5512                   | 87.0       | ENLLAALAER                   | ITRAQ4plex@N-term; Dimethyl(R)@10                            |                    | -0.01             | 1270.73       | 636.37   | 1270.74  | 636.38    | 2       | 653.1    |
| 87    | 30.9  | A0QXX7     | MSMEG_3461                   | 99.0       | DGAGAGTIPDFGGPGR             | ITRAQ4plex@N-term                                            | missed K-A@15      | -0.04             | 1684.79       | 562.60   | 1684.83  | 562.62    | 3       | 170.6    |
|       | 30.9  | A0QXX7     | MSMEG_3461                   | 99.0       | NPTMLVTDISMR                 | ITRAQ4plex@N-term                                            |                    | 0.02              | 1520.80       | 761.41   | 1520.78  | 761.40    | 2       | 1,012.8  |
|       | 30.9  | A0QXX7     | MSMEG_3461                   | 99.0       | TAWASAASYR                   | ITRAQ4plex@N-term                                            |                    | 0.00              | 1226.61       | 614.31   | 1226.62  | 614.32    | 2       | 5,826.7  |
|       | 30.9  | A0QXX7     | MSMEG_3461                   | 99.0       | WLDHPEELSEAFK                | ITRAQ4plex@N-term; Lys->Gln@14                               |                    | -0.01             | 1814.85       | 605.96   | 1814.86  | 605.96    | 3       | 239.8    |
|       | 30.9  | A0QXX7     | MSMEG_3461                   | 99.0       | WTATANDLVFGSHSVLR            | ITRAQ4plex@N-term                                            |                    | -0.02             | 2017.03       | 673.35   | 2017.05  | 673.36    | 3       | 336.9    |
|       | 30.9  | A0QXX7     | MSMEG_3461                   | 99.0       | WLDHPEELSEAFK                | ITRAQ4plex@N-term; Lys->Arg@14                               |                    | 0.00              | 1842.90       | 615.31   | 1842.90  | 615.31    | 3       | 33.7     |
|       | 30.9  | A0QXX7     | MSMEG_3461                   | 99.0       | WTATANDLVFGSHSVLR            | ITRAQ4plex@N-term; Dimethyl(R)@17                            |                    | 0.00              | 2045.08       | 682.70   | 2045.08  | 682.70    | 3       | 183.0    |
|       | 30.9  | A0QXX7     | MSMEG_3461                   | 99.0       | FAPINSWPDNVSLDKAR            | ITRAQ4plex@N-term; Deamidated(N)@10; User modH on Lys(K)@15  |                    | 0.04              | 2317.21       | 773.41   | 2317.17  | 773.40    | 3       | 19.6     |
|       | 30.9  | A0QXX7     | MSMEG_3461                   | 98.0       | VSLADLVLAGSAAIEK             | ITRAQ4plex@N-term; Lys->Gln@17                               |                    | 0.08              | 1813.12       | 605.38   | 1813.03  | 605.35    | 3       | 69.2     |
|       | 30.9  | A0QXX7     | MSMEG_3461                   | 96.0       | FAPINSWPDNVSLDKAR            | ITRAQ4plex@N-term; Lys->Ser@15; Arg->Om(R)@17                |                    | 0.04              | 1990.03       | 664.35   | 1989.99  | 664.34    | 3       | 500.7    |
|       | 30.9  | A0QXX7     | MSMEG_3461                   | 95.0       | TFGFGFGR                     | ITRAQ4plex@N-term                                            |                    | 0.00              | 1031.53       | 516.77   | 1031.53  | 516.77    | 2       | 1,498.0  |
|       | 30.9  | A0QXX7     | MSMEG_3461                   | 89.0       | ALDVNHGGTK                   | ITRAQ4plex@N-term; Lys->Gln@10                               |                    | 0.03              | 1154.61       | 385.88   | 1154.58  | 385.87    | 3       | 13.0     |
|       | 88    | 29.8       | A0R4H0                       | MSMEG_5830 | 99.0                         | EIPDVIAQALSELR                                               |                    | ITRAQ4plex@N-term | missed K-A@15 | 0.02     | 1696.97  | 849.49    | 1696.95 | 849.48   |
| 29.8  |       | A0R4H0     | MSMEG_5830                   | 99.0       | SSSSPALALPDDAR               | ITRAQ4plex@N-term                                            | 0.01               | 1643.83           |               | 822.92   | 1643.82  | 822.92    | 2       | 327.4    |
| 29.8  |       | A0R4H0     | MSMEG_5830                   | 99.0       | VSETTAHGYPPIR                | ITRAQ4plex@N-term                                            | 0.03               | 1473.80           |               | 492.27   | 1473.77  | 492.26    | 3       | 211.8    |
| 29.8  |       | A0R4H0     | MSMEG_5830                   | 99.0       | EIPDVIAQALSELR               | ITRAQ4plex@N-term; Dimethyl(R)@14                            | 0.04               | 1725.02           |               | 863.52   | 1724.98  | 863.50    | 2       | 69.3     |
| 29.8  |       | A0R4H0     | MSMEG_5830                   | 99.0       | EIPDVIAQALSELR               | ITRAQ4plex@N-term; Dimethyl(R)@14                            | 0.00               | 1724.98           |               | 863.50   | 1724.98  | 863.50    | 2       | 169.3    |
| 29.8  |       | A0R4H0     | MSMEG_5830                   | 94.0       | LAFVEDR                      | ITRAQ4plex@N-term                                            | -0.01              | 992.53            |               | 497.27   | 992.54   | 497.28    | 2       | 306.1    |
| 29.8  |       | A0R4H0     | MSMEG_5830                   | 91.0       | DIDDVER                      | ITRAQ4plex@N-term                                            | 0.00               | 1004.49           |               | 503.25   | 1004.49  | 503.25    | 2       | 92.7     |
| 89    | 29.1  | A0QV10     | MSMEG_2408                   | 99.0       | AIANSVPR                     | ITRAQ4plex@N-term                                            | missed K-K@23      | 0.01              | 1027.60       | 514.81   | 1027.59  | 514.80    | 2       | 1,459.4  |
|       | 29.1  | A0QV10     | MSMEG_2408                   | 99.0       | AVAAALQAGYR                  | ITRAQ4plex@N-term                                            |                    | 0.00              | 1233.69       | 617.85   | 1233.70  | 617.85    | 2       | 5,254.7  |
|       | 29.1  | A0QV10     | MSMEG_2408                   | 99.0       | LGIATEAWSPGQGSLLADPVITGIAEQH | ITRAQ4plex@N-term; ITRAQ4plex(H)@29; Lys->Gln@31             |                    | 0.05              | 3416.87       | 855.23   | 3416.82  | 855.21    | 4       | 200.8    |
|       | 29.1  | A0QV10     | MSMEG_2408                   | 99.0       | LWNSDQGYDATLAAFASVQR         | ITRAQ4plex@N-term                                            |                    | -0.02             | 2471.16       | 824.73   | 2471.18  | 824.74    | 3       | 104.1    |
|       | 29.1  | A0QV10     | MSMEG_2408                   | 85.0       | LWNSDQGYDATLAAFASVQR         | ITRAQ4plex@N-term; Gln->Arg@20                               |                    | -0.06             | 2499.17       | 834.06   | 2499.23  | 834.08    | 3       | 18.5     |
|       | 29.1  | A0QV10     | MSMEG_2408                   | 76.0       | TPAQVLIIR                    | ITRAQ4plex@N-term                                            |                    | 0.00              | 1040.64       | 521.33   | 1040.65  | 521.33    | 2       | 4,599.3  |
|       | 29.1  | A0QV10     | MSMEG_2408                   | 76.0       | TPAQVLIIR                    | ITRAQ4plex@N-term                                            |                    | 0.00              | 1040.64       | 521.33   | 1040.65  | 521.33    | 2       | 4,599.3  |
| 90    | 29.0  | A0R0B2     | MSMEG_4325                   | 99.0       | ACAVEPTGMAAVLGGDEAEVLR       | ITRAQ4plex@N-term; Pyridylethyl(C)@2                         | missed K-K@23      | 0.06              | 2478.29       | 827.11   | 2478.24  | 827.09    | 3       | 111.1    |
|       | 29.0  | A0R0B2     | MSMEG_4325                   | 99.0       | LEALDLVPAIR                  | ITRAQ4plex@N-term                                            |                    | -0.03             | 1353.74       | 677.88   | 1353.77  | 677.89    | 2       | 1,990.3  |
| 91    | 28.9  | A0R2Y1     | MSMEG_5273                   | 99.0       | AEAAINSGFFER                 | ITRAQ4plex@N-term                                            | missed K-K@23      | 0.02              | 1512.75       | 757.38   | 1512.73  | 757.37    | 2       | 2,908.5  |
|       | 28.9  | A0R2Y1     | MSMEG_5273                   | 99.0       | AVAVQLGYDFLPGTTVNR           | ITRAQ4plex@N-term                                            |                    | -0.05             | 2064.06       | 689.03   | 2064.11  | 689.04    | 3       | 26.1     |
|       | 28.9  | A0R2Y1     | MSMEG_5273                   | 99.0       | ITATLLNNLQTHDK               | ITRAQ4plex@N-term; Lys->Gln@14                               |                    | 0.02              | 1724.94       | 575.99   | 1724.92  | 575.98    | 3       | 127.7    |
|       | 28.9  | A0R2Y1     | MSMEG_5273                   | 99.0       | GSLVEMRPDLAAQMVK             | ITRAQ4plex@N-term; Lys->Gln@17                               |                    | 0.03              | 2003.02       | 668.68   | 2002.99  | 668.67    | 3       | 70.6     |
|       | 28.9  | A0R2Y1     | MSMEG_5273                   | 97.0       | EDQDHGVR                     | ITRAQ4plex@N-term                                            |                    | 0.04              | 1284.64       | 429.22   | 1284.60  | 429.21    | 3       | 126.7    |
|       | 28.9  | A0R2Y1     | MSMEG_5273                   | 93.0       | IVSTGVSLGSLPEIMGLPIEAVKK     | ITRAQ4plex@N-term; Oxidation(P)@18; Lys->Gln@23; Lys->Gln@24 |                    | 0.11              | 2541.45       | 848.16   | 2541.35  | 848.12    | 3       | 56.5     |
| 92    | 28.4  | A0QT04     | MSMEG_1665                   | 99.0       | ATAEYSGDHTSSIR               | ITRAQ4plex@N-term                                            | missed K-K@23      | 0.01              | 1637.79       | 546.94   | 1637.78  | 546.93    | 3       | 894.1    |
|       | 28.4  | A0QT04     | MSMEG_1665                   | 99.0       | IVVGDPHDPDLDGLPLISYHR        | ITRAQ4plex@N-term                                            |                    | 0.03              | 2530.32       | 633.59   | 2530.29  | 633.58    | 4       | 319.1    |
|       | 28.4  | A0QT04     | MSMEG_1665                   | 99.0       | LASEAGLPDGVFNVTGSGAEVGTALA   | ITRAQ4plex@N-term                                            |                    | 0.00              | 2995.55       | 749.89   | 2995.55  | 749.89    | 4       | 67.0     |
|       | 28.4  | A0QT04     | MSMEG_1665                   | 99.0       | LATEFDVPGSVDNIDFAGAAR        | ITRAQ4plex@N-term                                            |                    | -0.03             | 2455.19       | 819.40   | 2455.21  | 819.41    | 3       | 15.2     |
|       | 28.4  | A0QT04     | MSMEG_1665                   | 99.0       | SFTDDDDALR                   | ITRAQ4plex@N-term                                            |                    | 0.02              | 1297.61       | 649.81   | 1297.59  | 649.80    | 2       | 3,811.3  |
|       | 28.4  | A0QT04     | MSMEG_1665                   | 99.0       | SVSEYNLATAADVDTAVAAAR        | ITRAQ4plex@N-term; Ala->Val@20                               |                    | 0.04              | 2266.20       | 756.41   | 2266.16  | 756.39    | 3       |          |
| 93    | 28.4  | A0R4B7     | MSMEG_5776                   | 99.0       | IQEEDDAMDDLHGLHFTVLMDR       | ITRAQ4plex@N-term                                            | missed K-K@23      | -0.05             | 2743.22       | 686.81   | 2743.27  | 686.82    | 4       | 31.5     |
|       | 28.4  | A0R4B7     | MSMEG_5776                   | 99.0       | TVVSAIQIADVDR                | ITRAQ4plex@N-term                                            |                    | 0.03              | 1642.97       | 548.66   | 1642.94  | 548.65    | 3       |          |
| 94    | 27.8  | A0QPE8     | MSMEG_0373                   | 99.0       | LNVNGSSLAAGHPFAATGGR         | ITRAQ4plex@N-term                                            | missed K-K@23      | 0.04              | 2040.11       | 681.04   | 2040.06  | 681.03    | 3       | 320.0    |

Supplement Table 1A

| Index | % Cov | Uniprot ID | Gene locus<br>(M. smegmatis) | Conf | Peptide Sequence         | Modifications                                                              | Cleavages                            | ΔMass | Prec MW | Prec m/z | Calc. MW | Calc. m/z | Theor z | Area 115 |
|-------|-------|------------|------------------------------|------|--------------------------|----------------------------------------------------------------------------|--------------------------------------|-------|---------|----------|----------|-----------|---------|----------|
|       | 27.8  | A0QPE8     | MSMEG_0373                   | 99.0 | LPASLGVEIPVNSEPR         | iTRAQ4plex@N-term                                                          |                                      | -0.01 | 1821.00 | 608.01   | 1821.01  | 608.01    | 3       | 85.3     |
|       | 27.8  | A0QPE8     | MSMEG_0373                   | 99.0 | NMAAAYDAGFFDDLVTPLGVYR   | iTRAQ4plex@N-term                                                          |                                      | 0.06  | 2696.37 | 899.80   | 2696.31  | 899.78    | 3       | 116.1    |
|       | 27.8  | A0QPE8     | MSMEG_0373                   | 99.0 | VAVLGGNR                 | iTRAQ4plex@N-term                                                          |                                      | -0.01 | 928.55  | 465.28   | 928.56   | 465.29    | 2       | 1.633.0  |
|       | 27.8  | A0QPE8     | MSMEG_0373                   | 99.0 | LNVNGSSLAAGHPFAATGGR     | iTRAQ4plex@N-term; Deamidated(N)@4                                         |                                      | 0.00  | 2041.04 | 681.35   | 2041.05  | 681.36    | 3       | 126.0    |
| 95    | 27.8  | A0R2V7     | MSMEG_5249                   | 99.0 | QPAFQYQAQQVADNAQALADGFVK | iTRAQ4plex@N-term; Deamidated(Q)@9; User modH on Lys(K)@24; Arg->Orn(R)@25 | cleaved A-G@C-term; missed K-R@24; n | 0.06  | 3295.67 | 824.93   | 3295.61  | 824.91    | 4       | 923.9    |
|       | 27.8  | A0R2V7     | MSMEG_5249                   | 99.0 | HINDLSEADWETLR           | iTRAQ4plex@N-term                                                          |                                      | 0.00  | 1841.90 | 614.97   | 1841.90  | 614.97    | 3       | 311.8    |
|       | 27.8  | A0R2V7     | MSMEG_5249                   | 99.0 | LGTPALTSR                | iTRAQ4plex@N-term                                                          |                                      | 0.02  | 1058.64 | 530.33   | 1058.62  | 530.32    | 2       | 3.027.9  |
|       | 27.8  | A0R2V7     | MSMEG_5249                   | 99.0 | QAESALLDAGIVTNR          | iTRAQ4plex@N-term                                                          |                                      | 0.00  | 1700.92 | 851.47   | 1700.92  | 851.47    | 2       | 1.682.3  |
|       | 27.8  | A0R2V7     | MSMEG_5249                   | 99.0 | VAEIVLVAANTQPEGTSK       | iTRAQ4plex@N-term; Lys->Gln@19                                             |                                      | 0.03  | 2141.17 | 714.73   | 2141.13  | 714.72    | 3       | 29.4     |
|       | 27.8  | A0R2V7     | MSMEG_5249                   | 97.0 | AVALAEAR                 | iTRAQ4plex@N-term                                                          |                                      | 0.02  | 943.58  | 472.80   | 943.56   | 472.79    | 2       | 1.789.2  |
|       | 27.8  | A0R2V7     | MSMEG_5249                   | 92.0 | YAEGTIGHR                | iTRAQ4plex@N-term                                                          |                                      | -0.01 | 1146.58 | 383.20   | 1146.59  | 383.20    | 3       | 100.4    |
|       | 27.8  | A0R2V7     | MSMEG_5249                   | 91.0 | GADDFDR                  | iTRAQ4plex@N-term                                                          | cleaved F-G@N-term                   | 0.01  | 938.43  | 470.22   | 938.42   | 470.22    | 2       | 53.1     |
|       | 27.8  | A0R2V7     | MSMEG_5249                   | 89.0 | LADGTAER                 | iTRAQ4plex@N-term                                                          |                                      | 0.02  | 975.53  | 488.77   | 975.51   | 488.76    | 2       | 149.3    |
| 96    | 27.5  | A0R5N7     | MSMEG_6256                   | 99.0 | FAEAGVIVDNNSAFR          | iTRAQ4plex@N-term                                                          |                                      | 0.00  | 1824.95 | 609.32   | 1824.95  | 609.32    | 3       |          |
|       | 27.5  | A0R5N7     | MSMEG_6256                   | 99.0 | ILGIFELLVSGTCVR          | iTRAQ4plex@N-term; Pyridylethyl(C)@13                                      |                                      | 0.00  | 1818.06 | 607.03   | 1818.06  | 607.03    | 3       | 38.1     |
|       | 27.5  | A0R5N7     | MSMEG_6256                   | 99.0 | VNIGVVGATGQVGVQVMR       | iTRAQ4plex@N-term                                                          | cleaved M-V@N-term                   | 0.02  | 1828.03 | 610.35   | 1828.01  | 610.34    | 3       | 74.8     |
| 97    | 27.4  | A0R3V8     | MSMEG_5612                   | 99.0 | AADDGLSFVVR              | iTRAQ4plex@N-term                                                          |                                      | 0.01  | 1292.70 | 647.36   | 1292.68  | 647.35    | 2       | 1.831.0  |
|       | 27.4  | A0R3V8     | MSMEG_5612                   | 99.0 | LEIGHTWYTAAR             | iTRAQ4plex@N-term                                                          |                                      | 0.02  | 1631.87 | 544.96   | 1631.85  | 544.96    | 3       | 571.7    |
|       | 27.4  | A0R3V8     | MSMEG_5612                   | 94.0 | GTGVNAEAK                | iTRAQ4plex@N-term; Lys->Gln@9                                              |                                      | 0.04  | 989.53  | 495.77   | 989.49   | 495.75    | 2       | 243.4    |
|       | 27.4  | A0R3V8     | MSMEG_5612                   | 84.0 | WVQLEPLTR                | iTRAQ4plex@N-term                                                          |                                      | 0.00  | 1284.73 | 643.37   | 1284.73  | 643.37    | 2       | 1.443.9  |
| 98    | 27.3  | A0QYF5     | MSMEG_3640                   | 99.0 | FALNAANAR                | iTRAQ4plex@N-term                                                          |                                      | 0.03  | 1090.63 | 546.32   | 1090.60  | 546.31    | 2       | 5.183.8  |
|       | 27.3  | A0QYF5     | MSMEG_3640                   | 99.0 | GFLDEVVPLAEGSWSEATGLK    | iTRAQ4plex@N-term; iTRAQ4plex(T)@18; Lys->Gln@21                           |                                      | 0.02  | 2492.29 | 831.77   | 2492.27  | 831.76    | 3       | 88.5     |
|       | 27.3  | A0QYF5     | MSMEG_3640                   | 99.0 | RDELQAQIDK               | iTRAQ4plex@N-term; Lys->Gln@10                                             | missed R-D@1                         | 0.05  | 1358.74 | 453.92   | 1358.69  | 453.90    | 3       | 79.8     |
|       | 27.3  | A0QYF5     | MSMEG_3640                   | 99.0 | TGDEIHTSMEAGPMVR         | iTRAQ4plex@N-term                                                          |                                      | 0.05  | 1873.93 | 625.65   | 1873.88  | 625.63    | 3       | 456.3    |
|       | 27.3  | A0QYF5     | MSMEG_3640                   | 99.0 | TPDGEGELTLPR             | iTRAQ4plex@N-term                                                          |                                      | 0.00  | 1484.76 | 743.39   | 1484.76  | 743.39    | 2       | 707.2    |
|       | 27.3  | A0QYF5     | MSMEG_3640                   | 99.0 | VPDIHDVALMEDR            | iTRAQ4plex@N-term; Dimethyl(R)@13                                          |                                      | 0.00  | 1680.86 | 561.29   | 1680.86  | 561.29    | 3       | 102.6    |
|       | 27.3  | A0QYF5     | MSMEG_3640                   | 99.0 | VVFINTGFLDR              | iTRAQ4plex@N-term                                                          |                                      | -0.02 | 1423.78 | 712.90   | 1423.79  | 712.90    | 2       | 920.8    |
|       | 27.3  | A0QYF5     | MSMEG_3640                   | 99.0 | VPDIHDVALMEDR            | iTRAQ4plex@N-term                                                          |                                      | 0.00  | 1652.83 | 551.95   | 1652.83  | 551.95    | 3       | 351.3    |
|       | 27.3  | A0QYF5     | MSMEG_3640                   | 99.0 | VPDIHDVALMEDR            | iTRAQ4plex@N-term                                                          |                                      | -0.03 | 1652.80 | 551.94   | 1652.83  | 551.95    | 3       | 64.1     |
|       | 27.3  | A0QYF5     | MSMEG_3640                   | 92.0 | NWLGLNR                  | iTRAQ4plex@N-term                                                          |                                      | -0.01 | 1015.56 | 508.79   | 1015.57  | 508.79    | 2       | 2.989.5  |
|       | 27.3  | A0QYF5     | MSMEG_3640                   | 91.0 | NQELLAR                  | iTRAQ4plex@N-term                                                          |                                      | 0.02  | 986.58  | 494.30   | 986.56   | 494.29    | 2       | 1.190.2  |
| 99    | 27.3  | A0R095     | MSMEG_4306                   | 99.0 | QASLEEQLLEVMER           | iTRAQ4plex@N-term                                                          |                                      | -0.02 | 1817.91 | 606.98   | 1817.93  | 606.98    | 3       | 10.9     |
|       | 27.3  | A0R095     | MSMEG_4306                   | 99.0 | QVTEIQHELETLQR           | iTRAQ4plex@N-term                                                          |                                      | -0.05 | 1866.94 | 623.32   | 1866.99  | 623.34    | 3       | 162.3    |
| 100   | 27.2  | A0R0W7     | MSMEG_4533                   | 99.0 | AVVDGKPADIVNFSVEPDVTR    | iTRAQ4plex@N-term; Lys->Gln@6                                              |                                      | 0.00  | 2371.21 | 791.41   | 2371.21  | 791.41    | 3       | 268.5    |
|       | 27.2  | A0R0W7     | MSMEG_4533                   | 99.0 | GIPFGSVSLVVR             | iTRAQ4plex@N-term                                                          |                                      | -0.03 | 1472.86 | 737.43   | 1472.88  | 737.45    | 2       | 238.9    |
|       | 27.2  | A0R0W7     | MSMEG_4533                   | 99.0 | TSFGASGDQSR              | iTRAQ4plex@N-term                                                          |                                      | 0.02  | 1255.61 | 628.81   | 1255.59  | 628.80    | 2       | 225.3    |
|       | 27.2  | A0R0W7     | MSMEG_4533                   | 96.0 | IENPVAVNNTTSHSEAAANLAK   | iTRAQ4plex@N-term; iTRAQ4plex(S)@14; Lys->Gln@21                           |                                      | 0.02  | 2452.30 | 614.08   | 2452.28  | 614.08    | 4       | 392.0    |
|       | 27.2  | A0R0W7     | MSMEG_4533                   | 95.0 | IIPAFATADGK              | iTRAQ4plex@N-term; Lys->Gln@12                                             |                                      | 0.02  | 1405.74 | 703.88   | 1405.72  | 703.87    | 2       | 599.3    |
| 101   | 26.4  | A0R066     | MSMEG_4276                   | 99.0 | DSLQLLATDAGFAVEER        | iTRAQ4plex@N-term                                                          |                                      | 0.01  | 1978.02 | 660.35   | 1978.01  | 660.34    | 3       | 19.6     |
|       | 26.4  | A0R066     | MSMEG_4276                   | 99.0 | LVTPELSGSLLPGITR         | iTRAQ4plex@N-term                                                          |                                      | 0.00  | 1796.05 | 899.03   | 1796.05  | 899.03    | 2       | 3.177.2  |
|       | 26.4  | A0R066     | MSMEG_4276                   | 99.0 | VIATEPGLGVRPSNEYR        | iTRAQ4plex@N-term                                                          | cleaved F-V@N-term                   | 0.02  | 2001.09 | 668.04   | 2001.08  | 668.03    | 3       | 1.896.8  |
|       | 26.4  | A0R066     | MSMEG_4276                   | 99.0 | WADGSIVSFRPEAN           | iTRAQ4plex@N-term                                                          | cleaved N-A@C-term                   | 0.01  | 1691.85 | 846.93   | 1691.84  | 846.93    | 2       | 2.490.8  |
|       | 26.4  | A0R066     | MSMEG_4276                   | 99.0 | WADGSIVSFRPEANAAR        | iTRAQ4plex@N-term                                                          |                                      | 0.01  | 1990.03 | 664.35   | 1990.01  | 664.35    | 3       | 771.5    |
|       | 26.4  | A0R066     | MSMEG_4276                   | 99.0 | DSLQLLATDAGFAVEER        | iTRAQ4plex@N-term                                                          |                                      | 0.00  | 1978.01 | 660.34   | 1978.01  | 660.34    | 3       |          |
|       | 26.4  | A0R066     | MSMEG_4276                   | 99.0 | DSLQLLATDAGFAVEER        | iTRAQ4plex@N-term; Thr->Asn@8                                              |                                      | 0.02  | 1991.02 | 664.68   | 1991.01  | 664.68    | 3       | 21.7     |
|       | 26.4  | A0R066     | MSMEG_4276                   | 99.0 | DSLQLLATDAGFAVEER        | iTRAQ4plex@N-term                                                          |                                      | 0.04  | 1978.05 | 660.36   | 1978.01  | 660.34    | 3       | 30.4     |
|       | 26.4  | A0R066     | MSMEG_4276                   | 99.0 | DSLQLLATDAGFAVEER        | iTRAQ4plex@N-term; Dimethyl(R)@17                                          |                                      | 0.03  | 2006.08 | 669.70   | 2006.04  | 669.69    | 3       | 17.2     |
|       | 26.4  | A0R066     | MSMEG_4276                   | 99.0 | WADGSIVSFRPEANAAR        | iTRAQ4plex@N-term                                                          |                                      | 0.00  | 1990.02 | 664.35   | 1990.01  | 664.35    | 3       | 598.1    |
|       | 26.4  | A0R066     | MSMEG_4276                   | 97.0 | YLLIASPAGYFK             | iTRAQ4plex@N-term; iTRAQ4plex(Y)@11; Lys->Gln@13                           |                                      | 0.02  | 1700.96 | 567.99   | 1700.94  | 567.99    | 3       | 95.4     |
|       | 26.4  | A0R066     | MSMEG_4276                   | 95.0 | DSLQLLATDAGFAVEER        | iTRAQ4plex@N-term                                                          |                                      | 0.01  | 1978.02 | 660.35   | 1978.01  | 660.34    | 3       | 6.5      |
|       | 26.4  | A0R066     | MSMEG_4276                   | 83.0 | DSLQLLATDAGFAVEER        | iTRAQ4plex@N-term; Oxidation(D)@9; Oxidation(F)@12                         |                                      | 0.05  | 2010.05 | 671.02   | 2010.00  | 671.01    | 3       | 6.5      |
| 102   | 26.3  | A0R623     | MSMEG_6398                   | 99.0 | ANDPTENVATIANNGTR        | iTRAQ4plex@N-term; Deamidated(N)@14                                        |                                      | 0.03  | 1901.95 | 951.98   | 1901.92  | 951.97    | 2       | 895.6    |
|       | 26.3  | A0R623     | MSMEG_6398                   | 99.0 | VEFQSGGPGAPALYLLDGMIR    | iTRAQ4plex@N-term                                                          |                                      | -0.04 | 2221.09 | 741.37   | 2221.13  | 741.38    | 3       | 73.6     |

Supplement Table 1A

| Index | % Cov | Uniprot ID | Gene locus<br>(M. smegmatis) | Conf | Peptide Sequence            | Modifications                                              | Cleavages                   | ΔMass | Prec MW | Prec m/z | Calc. MW | Calc. m/z | Theor z | Area 115 |
|-------|-------|------------|------------------------------|------|-----------------------------|------------------------------------------------------------|-----------------------------|-------|---------|----------|----------|-----------|---------|----------|
| 103   | 26.3  | A0R623     | MSMEG_6398                   | 99.0 | WSRPLGPEYLEVPAAAMGR         | iTRAQ4plex@N-term                                          | cleaved A-W@N-term          | -0.01 | 2358.21 | 787.08   | 2358.23  | 787.08    | 3       | 165.8    |
|       | 25.9  | A0R278     | MSMEG_5015                   | 99.0 | DDLTYGQHLHPALDATGTSVPLDVPTI | iTRAQ4plex@N-term; iTRAQ4plex(T)@27; Lys->Gln@30           |                             | 0.00  | 3448.71 | 863.18   | 3448.71  | 863.19    | 4       | 122.4    |
|       | 25.9  | A0R278     | MSMEG_5015                   | 99.0 | DGKPADLQPYLGAYGHLVALR       | iTRAQ4plex@N-term; Lys->Gln@3                              |                             | 0.07  | 2397.33 | 600.34   | 2397.26  | 600.32    | 4       | 67.9     |
|       | 25.9  | A0R278     | MSMEG_5015                   | 99.0 | VFADFVPAGASGVVAEADLR        | iTRAQ4plex@N-term                                          |                             | 0.00  | 2134.11 | 712.38   | 2134.12  | 712.38    | 3       | 18.5     |
|       | 25.9  | A0R278     | MSMEG_5015                   | 99.0 | DGKPADLQPYLGAYGHLVALR       | iTRAQ4plex@N-term; Asp->Trp@1; Lys->Pro@3                  |                             | 0.00  | 2437.31 | 610.33   | 2437.30  | 610.33    | 4       | 121.7    |
|       | 25.9  | A0R278     | MSMEG_5015                   | 99.0 | VFADFVPAGASGVVAEADLR        | iTRAQ4plex@N-term; Ala->Val@17                             |                             | -0.02 | 2162.13 | 721.72   | 2162.15  | 721.72    | 3       | 26.8     |
| 104   | 25.6  | A0QV37     | MSMEG_2435                   | 96.0 | LDLFNAALAEAESGTTAAATTPK     | iTRAQ4plex@N-term; iTRAQ4plex(T)@21; Lys->Gln@23           |                             | 0.02  | 2550.33 | 851.12   | 2550.31  | 851.11    | 3       | 29.4     |
|       | 25.6  | A0QV37     | MSMEG_2435                   | 91.0 | IIVADAR                     | iTRAQ4plex@N-term                                          |                             | 0.00  | 900.55  | 451.28   | 900.55   | 451.28    | 2       | 1.282.8  |
| 105   | 25.5  | A0R3C8     | MSMEG_5427                   | 99.0 | DVIAATHGVLSDPAPQR           | iTRAQ4plex@N-term                                          |                             | -0.07 | 2003.02 | 668.68   | 2003.09  | 668.70    | 3       | 370.9    |
|       | 25.5  | A0R3C8     | MSMEG_5427                   | 99.0 | ITAILPFYPYAR                | iTRAQ4plex@N-term                                          |                             | 0.03  | 1567.92 | 784.97   | 1567.89  | 784.95    | 2       | 1.867.3  |
|       | 25.5  | A0R3C8     | MSMEG_5427                   | 99.0 | IVSVDLHTDQIQGFFDGPVDHMR     | iTRAQ4plex@N-term                                          |                             | 0.01  | 2769.38 | 693.35   | 2769.37  | 693.35    | 4       | 218.2    |
|       | 25.5  | A0R3C8     | MSMEG_5427                   | 99.0 | NLMLFAGR                    | iTRAQ4plex@N-term                                          |                             | -0.03 | 1064.56 | 533.29   | 1064.59  | 533.30    | 2       | 2.307.8  |
|       | 25.5  | A0R3C8     | MSMEG_5427                   | 94.0 | IVSVDLHTDQIQGFFDGPVDHMR     | iTRAQ4plex@N-term                                          |                             | 0.00  | 2769.37 | 693.35   | 2769.37  | 693.35    | 4       | 78.3     |
|       | 25.5  | A0R3C8     | MSMEG_5427                   | 93.0 | WADSLGGVPLAFIHK             | iTRAQ4plex@N-term; Lys->Gln@15                             |                             | -0.01 | 1753.92 | 585.65   | 1753.93  | 585.65    | 3       | 192.8    |
| 106   | 25.3  | A0R1H2     | MSMEG_4752                   | 99.0 | AAVVG FIR                   | iTRAQ4plex@N-term                                          |                             | -0.02 | 975.58  | 488.80   | 975.60   | 488.81    | 2       | 2.066.3  |
|       | 25.3  | A0R1H2     | MSMEG_4752                   | 99.0 | LALTVDSLAEER                | iTRAQ4plex@N-term                                          |                             | -0.02 | 1330.74 | 666.38   | 1330.76  | 666.39    | 2       | 828.0    |
| 107   | 25.1  | A0R198     | MSMEG_4673                   | 99.0 | GTGQGLNLVDVSYER             | iTRAQ4plex@N-term                                          |                             | -0.01 | 1750.89 | 876.45   | 1750.90  | 876.46    | 2       | 1.390.7  |
|       | 25.1  | A0R198     | MSMEG_4673                   | 99.0 | IEADSDRDR                   | iTRAQ4plex@N-term                                          | missed R-D@7                | 0.00  | 1219.59 | 407.54   | 1219.59  | 407.54    | 3       | 15.2     |
|       | 25.1  | A0R198     | MSMEG_4673                   | 99.0 | IIFLGSQVDDDIANR             | iTRAQ4plex@N-term                                          |                             | -0.04 | 1818.92 | 607.31   | 1818.96  | 607.33    | 3       | 168.7    |
|       | 25.1  | A0R198     | MSMEG_4673                   | 99.0 | LNAEFTGQPIER                | iTRAQ4plex@N-term                                          |                             | 0.01  | 1517.80 | 759.91   | 1517.80  | 759.91    | 2       | 2.223.1  |
| 108   | 25.1  | A0QXZ4     | MSMEG_3478                   | 99.0 | APTLADTAMFAR                | iTRAQ4plex@N-term                                          |                             | 0.01  | 1407.74 | 704.88   | 1407.73  | 704.87    | 2       | 2.103.6  |
|       | 25.1  | A0QXZ4     | MSMEG_3478                   | 99.0 | EWMFFDAHR                   | iTRAQ4plex@N-term                                          | cleaved Y-E@N-term          | -0.01 | 1452.67 | 485.23   | 1452.67  | 485.23    | 3       | 110.4    |
|       | 25.1  | A0QXZ4     | MSMEG_3478                   | 99.0 | LGATLGETEQATAQR             | iTRAQ4plex@N-term                                          |                             | 0.04  | 1688.93 | 845.47   | 1688.88  | 845.45    | 2       | 2.392.4  |
|       | 25.1  | A0QXZ4     | MSMEG_3478                   | 99.0 | VGAELMQR                    | iTRAQ4plex@N-term                                          |                             | -0.01 | 1046.56 | 524.29   | 1046.57  | 524.29    | 2       | 7.273.4  |
|       | 25.1  | A0QXZ4     | MSMEG_3478                   | 99.0 | APTLADTAMFAR                | iTRAQ4plex@N-term                                          |                             | 0.01  | 1407.74 | 704.88   | 1407.73  | 704.87    | 2       | 2.288.0  |
|       | 25.1  | A0QXZ4     | MSMEG_3478                   | 90.0 | YEWFFDAHR                   | iTRAQ4plex@N-term                                          |                             | 0.00  | 1615.74 | 539.59   | 1615.74  | 539.59    | 3       | 81.1     |
| 109   | 24.8  | A0QSU4     | MSMEG_1603                   | 99.0 | FEIPVIAHPTDALVSPEFAIEMGR    | iTRAQ4plex@N-term                                          |                             | 0.00  | 2782.45 | 928.49   | 2782.45  | 928.49    | 3       | 141.0    |
|       | 24.8  | A0QSU4     | MSMEG_1603                   | 99.0 | TFISELDVPPVAGGLDHR          | iTRAQ4plex@N-term                                          |                             | -0.03 | 2167.14 | 723.39   | 2167.18  | 723.40    | 3       | 376.4    |
| 110   | 24.7  | A0R0B5     | MSMEG_4328                   | 99.0 | IEAVPIAGFAQMR               | iTRAQ4plex@N-term                                          |                             | 0.00  | 1545.84 | 773.93   | 1545.85  | 773.93    | 2       | 1.023.2  |
|       | 24.7  | A0R0B5     | MSMEG_4328                   | 99.0 | IGGHILLEEFDSLTR             | iTRAQ4plex@N-term                                          |                             | 0.02  | 1858.97 | 620.67   | 1858.95  | 620.66    | 3       | 241.2    |
|       | 24.7  | A0R0B5     | MSMEG_4328                   | 99.0 | LSYLQKMATVLRGR              | iTRAQ4plex@N-term; User modH on Lys(K)@6; Deamidated(R)@13 | missed K-M@6; missed R-R@13 | -0.01 | 2023.12 | 675.38   | 2023.12  | 675.38    | 3       | 95.7     |
|       | 24.7  | A0R0B5     | MSMEG_4328                   | 97.0 | AGVCTSISACASGSEAIANAWR      | iTRAQ4plex@N-term; No Pyridylethyl(C)@4; Cys->Thr@10       |                             | -0.08 | 2266.04 | 756.35   | 2266.11  | 756.38    | 3       | 59.4     |
| 111   | 24.5  | A0QVY9     | MSMEG_2744                   | 99.0 | EDEATGAAAVR                 | iTRAQ4plex@N-term                                          |                             | 0.01  | 1232.62 | 617.32   | 1232.61  | 617.31    | 2       | 31.5     |
|       | 24.5  | A0QVY9     | MSMEG_2744                   | 99.0 | FGNPLGVVDNSTVDPADR          | iTRAQ4plex@N-term                                          |                             | 0.02  | 2016.02 | 673.02   | 2016.00  | 673.01    | 3       | 436.2    |
|       | 24.5  | A0QVY9     | MSMEG_2744                   | 99.0 | MFATNLGIR                   | iTRAQ4plex@N-term                                          |                             | -0.03 | 1165.61 | 583.81   | 1165.64  | 583.83    | 2       | 5.509.9  |
|       | 24.5  | A0QVY9     | MSMEG_2744                   | 99.0 | EDEATGAAAVR                 | iTRAQ4plex@N-term                                          |                             | 0.02  | 1232.63 | 617.32   | 1232.61  | 617.31    | 2       | 2.539.5  |
|       | 24.5  | A0QVY9     | MSMEG_2744                   | 93.0 | ITDYLSR                     | iTRAQ4plex@N-term                                          |                             | -0.01 | 1010.54 | 506.28   | 1010.55  | 506.28    | 2       | 3.469.4  |
| 112   | 24.0  | A0QVT1     | MSMEG_2684                   | 99.0 | DMLTAFNSGDVATAR             | iTRAQ4plex@N-term; Ala->Val@14                             |                             | 0.02  | 1739.88 | 580.97   | 1739.86  | 580.96    | 3       | 222.1    |
|       | 24.0  | A0QVT1     | MSMEG_2684                   | 99.0 | LPQIPATTEEVEALAADMRR        | iTRAQ4plex@N-term                                          |                             | -0.02 | 2198.11 | 733.71   | 2198.14  | 733.72    | 3       |          |
|       | 24.0  | A0QVT1     | MSMEG_2684                   | 99.0 | SVVPIAWDTLR                 | iTRAQ4plex@N-term                                          |                             | 0.01  | 1399.80 | 700.91   | 1399.79  | 700.90    | 2       | 1.653.2  |
|       | 24.0  | A0QVT1     | MSMEG_2684                   | 99.0 | TVVDVAGDR                   | iTRAQ4plex@N-term                                          |                             | 0.00  | 1074.58 | 538.30   | 1074.58  | 538.30    | 2       | 9.724.5  |
|       | 24.0  | A0QVT1     | MSMEG_2684                   | 99.0 | VIAGAGSYDTAHSVHLAK          | iTRAQ4plex@N-term; Lys->Gln@18                             |                             | 0.05  | 1940.03 | 486.02   | 1939.99  | 486.00    | 4       | 746.5    |
|       | 24.0  | A0QVT1     | MSMEG_2684                   | 99.0 | LPQIPATTEEVEALAADMRR        | iTRAQ4plex@N-term                                          |                             | -0.02 | 2198.12 | 733.71   | 2198.14  | 733.72    | 3       | 23.9     |
| 113   | 24.0  | A0QZR5     | MSMEG_4121                   | 98.0 | SSAELATLADIVQR              | iTRAQ4plex@N-term                                          |                             | 0.04  | 1616.93 | 539.98   | 1616.89  | 539.97    | 3       |          |
| 114   | 23.8  | A0R2V1     | MSMEG_5243                   | 99.0 | VLPTQITGR                   | iTRAQ4plex@N-term                                          |                             | 0.00  | 1127.68 | 564.85   | 1127.68  | 564.85    | 2       | 4.284.0  |
| 115   | 23.7  | A0QVR8     | MSMEG_2669                   | 99.0 | IPNWGPINLNTVFSQDQDER        | iTRAQ4plex@N-term                                          |                             | -0.03 | 2358.14 | 787.05   | 2358.17  | 787.06    | 3       | 57.4     |

Supplement Table 1A

| Index | % Cov | Uniprot ID | Gene locus<br>(M. smegmatis) | Conf | Peptide Sequence         | Modifications                                    | Cleavages                        | ΔMass | Prec MW | Prec m/z | Calc. MW | Calc. m/z | Theor z | Area 115 |
|-------|-------|------------|------------------------------|------|--------------------------|--------------------------------------------------|----------------------------------|-------|---------|----------|----------|-----------|---------|----------|
|       | 23.7  | A0QVR8     | MSMEG_2669                   | 85.0 | IAVEDDPDPSHLLADK         | ITRAQ4plex@N-term; ITRAQ4plex(H)@11; Lys->Gln@16 | cleaved F-A@C-term; missed R-L@1 | 0.05  | 2022.06 | 675.03   | 2022.01  | 675.01    | 3       | 943.8    |
|       | 23.7  | A0QVR8     | MSMEG_2669                   | 85.0 | RLEDALSGASVEHTIEFYPAHGFG | ITRAQ4plex@N-term                                |                                  | -0.02 | 2746.33 | 687.59   | 2746.35  | 687.59    | 4       |          |
| 116   | 23.5  | A0R2U8     | MSMEG_5240                   | 99.0 | ADTDVEYR                 | ITRAQ4plex@N-term                                | cleaved M-A@N-term               | 0.00  | 1111.52 | 556.77   | 1111.53  | 556.77    | 2       | 158.2    |
|       | 23.5  | A0R2U8     | MSMEG_5240                   | 99.0 | AVENFPISFR               | ITRAQ4plex@N-term                                |                                  | 0.01  | 1322.72 | 662.37   | 1322.71  | 662.36    | 2       | 732.4    |
|       | 23.5  | A0R2U8     | MSMEG_5240                   | 99.0 | NLLESFTLLSNVSR           | ITRAQ4plex@N-term                                |                                  | 0.00  | 1735.96 | 868.99   | 1735.96  | 868.99    | 2       | 514.1    |
|       | 23.5  | A0R2U8     | MSMEG_5240                   | 99.0 | VVEVLVNETGLAELR          | ITRAQ4plex@N-term                                |                                  | 0.00  | 1784.02 | 595.68   | 1784.02  | 595.68    | 3       |          |
|       | 23.5  | A0R2U8     | MSMEG_5240                   | 97.0 | QIEAGIER                 | ITRAQ4plex@N-term                                |                                  | 0.02  | 1058.60 | 530.31   | 1058.58  | 530.30    | 2       | 1,365.1  |
| 117   | 23.5  | A0QQF0     | MSMEG_0732                   | 99.0 | AIDLVEAASR               | ITRAQ4plex@N-term                                |                                  | 0.02  | 1302.71 | 652.36   | 1302.69  | 652.35    | 2       | 1,602.0  |
|       | 23.5  | A0QQF0     | MSMEG_0732                   | 99.0 | ALAEFLFDDER              | ITRAQ4plex@N-term                                |                                  | 0.00  | 1468.73 | 735.37   | 1468.73  | 735.37    | 2       | 1,479.0  |
|       | 23.5  | A0QQF0     | MSMEG_0732                   | 99.0 | ITDSALVAAATLSDR          | ITRAQ4plex@N-term                                |                                  | 0.02  | 1646.92 | 824.47   | 1646.90  | 824.46    | 2       | 422.4    |
|       | 23.5  | A0QQF0     | MSMEG_0732                   | 99.0 | IVAGDVPESLR              | ITRAQ4plex@N-term                                |                                  | 0.00  | 1298.74 | 650.38   | 1298.73  | 650.37    | 2       | 2,009.6  |
|       | 23.5  | A0QQF0     | MSMEG_0732                   | 99.0 | MEIDSRPVEIDEVER          | ITRAQ4plex@N-term                                |                                  | 0.07  | 1960.03 | 654.35   | 1959.97  | 654.33    | 3       | 506.6    |
|       | 23.5  | A0QQF0     | MSMEG_0732                   | 99.0 | TAIVEGLAQR               | ITRAQ4plex@N-term                                |                                  | -0.02 | 1200.68 | 601.35   | 1200.69  | 601.35    | 2       | 3,605.9  |
|       | 23.5  | A0QQF0     | MSMEG_0732                   | 99.0 | ITDSALVAAATLSDR          | ITRAQ4plex@N-term                                |                                  | 0.03  | 1646.93 | 549.98   | 1646.90  | 549.97    | 3       |          |
|       | 23.5  | A0QQF0     | MSMEG_0732                   | 97.0 | TVIALDLGSMVAGAK          | ITRAQ4plex@N-term; Lys->Gln@15                   |                                  | 0.04  | 1588.91 | 530.64   | 1588.86  | 530.63    | 3       |          |
|       | 23.5  | A0QQF0     | MSMEG_0732                   | 80.0 | YSTDLTAR                 | ITRAQ4plex@N-term                                |                                  | -0.01 | 1069.54 | 535.78   | 1069.55  | 535.78    | 2       | 12,437.7 |
| 118   | 23.5  | A0R3Y5     | MSMEG_5639                   | 99.0 | EAVENAASEDIR             | ITRAQ4plex@N-term                                |                                  | -0.01 | 1446.70 | 724.35   | 1446.71  | 724.36    | 2       | 1,802.8  |
|       | 23.5  | A0R3Y5     | MSMEG_5639                   | 99.0 | LDAETALQTGMANR           | ITRAQ4plex@N-term                                |                                  | 0.02  | 1633.84 | 817.93   | 1633.82  | 817.92    | 2       | 939.2    |
|       | 23.5  | A0R3Y5     | MSMEG_5639                   | 99.0 | LTSLVGYGR                | ITRAQ4plex@N-term                                |                                  | 0.00  | 1108.64 | 555.33   | 1108.64  | 555.33    | 2       | 1,725.1  |
|       | 23.5  | A0R3Y5     | MSMEG_5639                   | 99.0 | SPDVIEAQR                | ITRAQ4plex@N-term                                |                                  | 0.00  | 1327.72 | 664.87   | 1327.72  | 664.87    | 2       | 2,495.2  |
|       | 23.5  | A0R3Y5     | MSMEG_5639                   | 99.0 | YGLALDNWSIR              | ITRAQ4plex@N-term                                |                                  | -0.01 | 1450.76 | 726.39   | 1450.77  | 726.39    | 2       | 2,670.9  |
| 119   | 23.3  | A0R574     | MSMEG_6091                   | 99.0 | AHQEIYNSLLQVLEDGR        | ITRAQ4plex@N-term                                | cleaved F-S@N-term               | -0.01 | 2128.09 | 710.37   | 2128.10  | 710.38    | 3       | 128.8    |
|       | 23.3  | A0R574     | MSMEG_6091                   | 99.0 | AIDLIDEAGAR              | ITRAQ4plex@N-term                                |                                  | 0.02  | 1286.72 | 644.37   | 1286.70  | 644.35    | 2       | 705.6    |
|       | 23.3  | A0R574     | MSMEG_6091                   | 99.0 | EALQLGHNYIGTEHILLGLIR    | ITRAQ4plex@N-term                                |                                  | -0.05 | 2503.36 | 626.85   | 2503.40  | 626.86    | 4       | 32.6     |
|       | 23.3  | A0R574     | MSMEG_6091                   | 99.0 | LTEEETTR                 | ITRAQ4plex@N-term                                |                                  | 0.02  | 1121.59 | 561.80   | 1121.57  | 561.79    | 2       | 440.2    |
|       | 23.3  | A0R574     | MSMEG_6091                   | 99.0 | SOQGSSENNYER             | ITRAQ4plex@N-term; Deamidated(Q)@2; Methyl(S)@5  |                                  | 0.05  | 1398.66 | 700.34   | 1398.61  | 700.31    | 2       | 1,832.6  |
|       | 23.3  | A0R574     | MSMEG_6091                   | 99.0 | VSITDSAMVAAATLADR        | ITRAQ4plex@N-term                                |                                  | 0.04  | 1834.99 | 612.67   | 1834.96  | 612.66    | 3       | 13.0     |
| 120   | 23.2  | A0QWV0     | MSMEG_3072                   | 99.0 | GEISGPGSDGDDVLR          | ITRAQ4plex@N-term                                |                                  | 0.02  | 1715.86 | 858.94   | 1715.84  | 858.93    | 2       | 195.2    |
|       | 23.2  | A0QWV0     | MSMEG_3072                   | 99.0 | VGLDGYGLHIIR             | ITRAQ4plex@N-term                                |                                  | 0.00  | 1584.87 | 529.30   | 1584.87  | 529.30    | 3       | 27.1     |
|       | 23.2  | A0QWV0     | MSMEG_3072                   | 98.0 | HGTAYTVTVDAK             | ITRAQ4plex@N-term; Lys->Gln@12                   |                                  | 0.04  | 1405.73 | 469.58   | 1405.70  | 469.57    | 3       | 109.0    |
| 121   | 23.0  | A0QSD1     | MSMEG_1436                   | 99.0 | DGYSAVQLAYGEISPR         | ITRAQ4plex@N-term                                |                                  | -0.06 | 1868.88 | 623.97   | 1868.94  | 623.99    | 3       |          |
|       | 23.0  | A0QSD1     | MSMEG_1436                   | 98.0 | AGPNVVTR                 | ITRAQ4plex@N-term                                |                                  | 0.00  | 956.55  | 479.28   | 956.55   | 479.28    | 2       | 182.9    |
|       | 23.0  | A0QSD1     | MSMEG_1436                   | 88.0 | AGPNVVTR                 | No ITRAQ4plex@N-term; Gly->Pro@2                 |                                  | 0.02  | 852.51  | 427.26   | 852.48   | 427.25    | 2       | 5.4      |
| 122   | 23.0  | A0QSZ3     | MSMEG_1654                   | 99.0 | GISNFHSPSDVIVDASMPAMIR   | ITRAQ4plex@N-term                                |                                  | 0.02  | 2487.26 | 830.09   | 2487.24  | 830.09    | 3       | 75.7     |
|       | 23.0  | A0QSZ3     | MSMEG_1654                   | 99.0 | ILAEFGDHLTEEQR           | ITRAQ4plex@N-term                                |                                  | -0.01 | 1800.90 | 601.31   | 1800.91  | 601.31    | 3       | 99.6     |
|       | 23.0  | A0QSZ3     | MSMEG_1654                   | 99.0 | ILGSAVNPVLR              | ITRAQ4plex@N-term                                |                                  | -0.01 | 1281.78 | 641.90   | 1281.79  | 641.90    | 2       | 1,847.1  |
|       | 23.0  | A0QSZ3     | MSMEG_1654                   | 98.0 | TSDISVAAR                | ITRAQ4plex@N-term                                |                                  | 0.00  | 1062.57 | 532.29   | 1062.58  | 532.30    | 2       | 273.2    |
|       | 23.0  | A0QSZ3     | MSMEG_1654                   | 77.0 | VPDNLGELGALTQDPSANIIK    | ITRAQ4plex@N-term; ITRAQ4plex(S)@16; Lys->Gln@21 |                                  | 0.00  | 2452.30 | 818.44   | 2452.31  | 818.44    | 3       | 27.1     |
| 123   | 23.0  | A0R5L6     | MSMEG_6235                   | 99.0 | FSTVIDSTLFHSLPVEGR       | ITRAQ4plex@N-term                                | missed R-D@12                    | -0.05 | 2148.09 | 717.04   | 2148.13  | 717.05    | 3       | 79.3     |
|       | 23.0  | A0R5L6     | MSMEG_6235                   | 99.0 | IMFPAPLLEAHRD            | ITRAQ4plex@N-term                                |                                  | -0.02 | 1702.87 | 568.63   | 1702.90  | 568.64    | 3       | 82.4     |
|       | 23.0  | A0R5L6     | MSMEG_6235                   | 99.0 | NLATASFVQGDITSFTGYDGR    | ITRAQ4plex@N-term                                |                                  | -0.03 | 2363.12 | 788.71   | 2363.15  | 788.72    | 3       | 16.3     |
| 124   | 22.8  | A0R597     | MSMEG_6114                   | 99.0 | WDHIQDVGDISQFELDAIK      | ITRAQ4plex@N-term; Lys->Gln@19                   |                                  | 0.07  | 2372.21 | 791.74   | 2372.14  | 791.72    | 3       | 51.7     |
| 125   | 22.8  | A0QS07     | MSMEG_1305                   | 99.0 | LAHAVPLTPELAHDLGEFSGR    | ITRAQ4plex@N-term                                | missed R-N@9                     | -0.03 | 2307.21 | 770.08   | 2307.23  | 770.09    | 3       | 151.6    |
|       | 22.8  | A0QS07     | MSMEG_1305                   | 99.0 | LLLWEGLDRNPLDGNPPAAR     | ITRAQ4plex@N-term                                |                                  | -0.02 | 2360.25 | 787.76   | 2360.27  | 787.76    | 3       | 221.2    |
| 126   | 22.8  | A0R4B3     | MSMEG_5773                   | 99.0 | DVSAAGLDIAPNQAMASLHR     | ITRAQ4plex@N-term                                |                                  | -0.08 | 2180.03 | 727.69   | 2180.11  | 727.71    | 3       | 47.8     |
|       | 22.8  | A0R4B3     | MSMEG_5773                   | 99.0 | EDFTGEGAR                | ITRAQ4plex@N-term                                |                                  | 0.00  | 1124.53 | 563.27   | 1124.52  | 563.27    | 2       | 143.8    |
|       | 22.8  | A0R4B3     | MSMEG_5773                   | 99.0 | IHLDDVMPVLR              | ITRAQ4plex@N-term                                |                                  | -0.01 | 1549.86 | 517.63   | 1549.88  | 517.63    | 3       | 171.2    |
|       | 22.8  | A0R4B3     | MSMEG_5773                   | 99.0 | TAMVQNLLTEDNLPYSYHR      | ITRAQ4plex@N-term                                |                                  | -0.02 | 2245.11 | 749.38   | 2245.13  | 749.38    | 3       | 115.7    |
|       | 22.8  | A0R4B3     | MSMEG_5773                   | 91.0 | MPGYTVPDFR               | ITRAQ4plex@N-term                                |                                  | 0.01  | 1325.66 | 663.84   | 1325.66  | 663.84    | 2       | 929.4    |

Supplement Table 1A

| Index | % Cov | Uniprot ID | Gene locus<br>(M. smegmatis) | Conf | Peptide Sequence            | Modifications                               | Cleavages                         | ΔMass | Prec MW | Prec m/z | Calc. MW | Calc. m/z | Theor z | Area 115 |
|-------|-------|------------|------------------------------|------|-----------------------------|---------------------------------------------|-----------------------------------|-------|---------|----------|----------|-----------|---------|----------|
| 127   | 22.6  | A0QQL0     | MSMEG_0793                   | 99.0 | ASDPPTMAAAMASAVTAGHLAR      | iTRAQ4plex@N-term                           |                                   | 0.02  | 2240.14 | 747.72   | 2240.12  | 747.71    | 3       | 85.5     |
|       | 22.6  | A0QQL0     | MSMEG_0793                   | 99.0 | RFWAQASSPAL                 | iTRAQ4plex@N-term                           | missed R-F@1                      | 0.02  | 1376.75 | 689.38   | 1376.73  | 689.37    | 2       | 437.6    |
|       | 22.6  | A0QQL0     | MSMEG_0793                   | 99.0 | RVDAETGTGVLDLLNR            | iTRAQ4plex@N-term                           | missed R-V@1                      | -0.02 | 1872.00 | 625.01   | 1872.02  | 625.01    | 3       | 154.9    |
|       | 22.6  | A0QQL0     | MSMEG_0793                   | 99.0 | RVDAETGTGVLDLLNR            | iTRAQ4plex@N-term                           | missed R-V@1                      | -0.01 | 1872.01 | 625.01   | 1872.02  | 625.01    | 3       | 110.7    |
|       | 22.6  | A0QQL0     | MSMEG_0793                   | 93.0 | LEVIADER                    | iTRAQ4plex@N-term                           |                                   | 0.00  | 1087.60 | 544.81   | 1087.60  | 544.81    | 2       | 4786.3   |
|       | 22.6  | A0QQL0     | MSMEG_0793                   | 92.0 | RVDAETGTGVLDLLNR            | iTRAQ4plex@N-term; Dimethyl(R)@16           | missed R-V@1                      | -0.02 | 1900.03 | 634.35   | 1900.05  | 634.36    | 3       | 28.3     |
| 128   | 22.6  | A0QX01     | MSMEG_3124                   | 99.0 | IAILDETDSDLVDALR            | iTRAQ4plex@N-term                           |                                   | 0.02  | 1959.05 | 654.02   | 1959.03  | 654.02    | 3       |          |
|       | 22.6  | A0QX01     | MSMEG_3124                   | 99.0 | YIQPFVHVVFVGR               | iTRAQ4plex@N-term                           |                                   | 0.00  | 1789.97 | 597.66   | 1789.97  | 597.67    | 3       | 263.3    |
| 129   | 22.4  | A0QS81     | MSMEG_1383                   | 99.0 | AADAPVICETAEAGR             | iTRAQ4plex@N-term; Pyridylethyl(C)@8        |                                   | 0.04  | 1721.90 | 574.97   | 1721.85  | 574.96    | 3       | 1.838.1  |
|       | 22.4  | A0QS81     | MSMEG_1383                   | 99.0 | ALDALDTPVYLENTAGGDHAMAR     | iTRAQ4plex@N-term                           |                                   | -0.02 | 2758.31 | 920.44   | 2758.34  | 920.45    | 3       | 352.7    |
|       | 22.4  | A0QS81     | MSMEG_1383                   | 85.0 | DDIAFLR                     | iTRAQ4plex@N-term                           |                                   | 0.00  | 992.54  | 497.28   | 992.54   | 497.28    | 2       | 229.9    |
| 130   | 22.2  | A0QWW4     | MSMEG_3086                   | 99.0 | EAGNHVEFNVNSLR              | iTRAQ4plex@N-term                           |                                   | 0.00  | 1728.87 | 577.30   | 1728.87  | 577.30    | 3       | 564.6    |
|       | 22.2  | A0QWW4     | MSMEG_3086                   | 99.0 | GELANLSSSEIAAGVR            | iTRAQ4plex@N-term                           |                                   | 0.00  | 1716.91 | 859.46   | 1716.91  | 859.46    | 2       | 1,008.7  |
|       | 22.2  | A0QWW4     | MSMEG_3086                   | 87.0 | LTYGAQDLSQHDGAYTGEISGAFKAKL | iTRAQ4plex@N-term; Ala->Thr@26; Lys->Glu@27 | cleaved L-G@C-term; missed K-L@27 | 0.10  | 3087.58 | 772.90   | 3087.48  | 772.88    | 4       | 198.2    |
| 131   | 22.1  | A0QWV9     | MSMEG_3081                   | 99.0 | GLPAQVVGGSVGDAAEAWR         | iTRAQ4plex@N-term                           |                                   | -0.03 | 1983.00 | 662.01   | 1983.03  | 662.02    | 3       | 62.9     |
|       | 22.1  | A0QWV9     | MSMEG_3081                   | 99.0 | LGVSAAKAR                   | iTRAQ4plex@N-term; User modH on Lys(K)@6    | missed K-A@6                      | 0.05  | 1187.75 | 594.88   | 1187.70  | 594.86    | 2       | 622.9    |
|       | 22.1  | A0QWV9     | MSMEG_3081                   | 89.0 | AAVAAAAR                    | iTRAQ4plex@N-term                           |                                   | -0.03 | 843.48  | 422.75   | 843.50   | 422.76    | 2       | 223.6    |
|       | 22.1  | A0QWV9     | MSMEG_3081                   | 77.0 | LGVSAAKAR                   | iTRAQ4plex@N-term; User modH on Lys(K)@6    | missed K-A@6                      | -0.06 | 1187.64 | 396.89   | 1187.70  | 396.91    | 3       | 41.3     |
| 132   | 22.0  | A0QSP9     | MSMEG_1557                   | 99.0 | EPVIIDRPIQTVGR              | iTRAQ4plex@N-term                           |                                   | 0.01  | 1736.01 | 579.68   | 1736.01  | 579.68    | 3       | 1,122.6  |
|       | 22.0  | A0QSP9     | MSMEG_1557                   | 99.0 | LVPGTGQFNLDGR               | iTRAQ4plex@N-term                           |                                   | 0.02  | 1516.84 | 759.43   | 1516.81  | 759.41    | 2       | 1,011.8  |
| 133   | 22.0  | A0R2J4     | MSMEG_5136                   | 99.0 | LVFTEDALPAVQPVNFR           | iTRAQ4plex@N-term                           |                                   | 0.03  | 2059.15 | 687.39   | 2059.12  | 687.38    | 3       | 228.1    |
|       | 22.0  | A0R2J4     | MSMEG_5136                   | 95.0 | NQVVAFEADELDPDLR            | iTRAQ4plex@N-term                           |                                   | 0.04  | 1974.02 | 659.01   | 1973.98  | 659.00    | 3       | 8.7      |
| 134   | 21.9  | A0R3D2     | MSMEG_5431                   | 99.0 | NIQHADLLVQQR                | iTRAQ4plex@N-term                           |                                   | 0.00  | 1548.89 | 517.30   | 1548.89  | 517.30    | 3       | 528.4    |
|       | 21.9  | A0R3D2     | MSMEG_5431                   | 99.0 | VPVAVLYGHGTDPPQHLELNAR      | iTRAQ4plex@N-term                           |                                   | -0.03 | 2330.20 | 583.56   | 2330.23  | 583.56    | 4       | 310.8    |
|       | 21.9  | A0R3D2     | MSMEG_5431                   | 82.0 | TRTGGKASR                   | iTRAQ4plex@N-term; User modH on Lys(K)@5    | missed R-T@2; missed K-G@5        | 0.01  | 1319.74 | 660.88   | 1319.73  | 660.87    | 2       | 817.1    |
| 135   | 21.8  | A0QSD7     | MSMEG_1442                   | 99.0 | RSGSAGTTATSTEAGR            | iTRAQ4plex@N-term                           | missed R-S@1                      | 0.01  | 1652.83 | 551.95   | 1652.82  | 551.95    | 3       |          |
| 136   | 21.8  | A0R7G6     | MSMEG_6904                   | 99.0 | AFGDVPLNLEYK                | iTRAQ4plex@N-term; Lys->Gln@12              |                                   | 0.05  | 1508.82 | 755.42   | 1508.76  | 755.39    | 2       | 523.3    |
|       | 21.8  | A0R7G6     | MSMEG_6904                   | 99.0 | TYQLNVGGNMFNMLER            | iTRAQ4plex@N-term                           |                                   | -0.02 | 2258.07 | 753.70   | 2258.09  | 753.71    | 3       | 32.6     |
|       | 21.8  | A0R7G6     | MSMEG_6904                   | 99.0 | SQVGATITHR                  | iTRAQ4plex@N-term                           |                                   | 0.00  | 1212.67 | 405.23   | 1212.67  | 405.23    | 3       | 103.8    |
|       | 21.8  | A0R7G6     | MSMEG_6904                   | 95.0 | SQVGATITHR                  | No iTRAQ4plex@N-term                        |                                   | 0.00  | 1068.57 | 535.29   | 1068.57  | 535.29    | 2       |          |
| 137   | 21.6  | A0QXH9     | MSMEG_3308                   | 99.0 | DVAYAAGAR                   | iTRAQ4plex@N-term                           |                                   | 0.01  | 1036.55 | 519.28   | 1036.54  | 519.28    | 2       | 1,135.4  |
|       | 21.6  | A0QXH9     | MSMEG_3308                   | 99.0 | DVAYAAGAR                   | iTRAQ4plex@N-term                           |                                   | 0.00  | 1036.54 | 519.28   | 1036.54  | 519.28    | 2       | 849.8    |
| 138   | 21.6  | A0QP01     | MSMEG_0224                   | 99.0 | LLSLLAGISGAR                | iTRAQ4plex@N-term                           |                                   | 0.01  | 1313.83 | 657.92   | 1313.82  | 657.91    | 2       | 182.9    |
| 139   | 21.5  | A0QSD5     | MSMEG_1440                   | 99.0 | STIIPDFIGHTF                | iTRAQ4plex@N-term                           | cleaved F-A@C-term                | 0.00  | 1490.79 | 746.40   | 1490.79  | 746.40    | 2       | 1,272.7  |
|       | 21.5  | A0QSD5     | MSMEG_1440                   | 93.0 | LGEFAPTR                    | iTRAQ4plex@N-term                           |                                   | 0.00  | 1033.57 | 517.79   | 1033.57  | 517.79    | 2       | 2,451.8  |
| 140   | 21.5  | A0R1Z9     | MSMEG_4935                   | 98.0 | TTAGEIGILPR                 | iTRAQ4plex@N-term                           |                                   | -0.05 | 1270.69 | 636.35   | 1270.74  | 636.38    | 2       | 436.3    |
| 141   | 21.4  | A0R0W1     | MSMEG_4527                   | 99.0 | TLGGISTEFAR                 | iTRAQ4plex@N-term                           |                                   | 0.01  | 1294.71 | 648.36   | 1294.70  | 648.36    | 2       | 870.5    |
|       | 21.4  | A0R0W1     | MSMEG_4527                   | 99.0 | VLSSELGDYIER                | iTRAQ4plex@N-term                           |                                   | 0.01  | 1523.80 | 762.91   | 1523.80  | 762.90    | 2       | 2,152.2  |
|       | 21.4  | A0R0W1     | MSMEG_4527                   | 92.0 | FAQWAVR                     | iTRAQ4plex@N-term                           |                                   | -0.01 | 1020.55 | 511.28   | 1020.56  | 511.29    | 2       | 3,313.1  |
|       | 21.4  | A0R0W1     | MSMEG_4527                   | 82.0 | RAQVLVPELEKR                | iTRAQ4plex@N-term; User modH on Lys(K)@11   | missed R-A@1; missed K-R@11       | -0.02 | 1824.04 | 609.02   | 1824.06  | 609.03    | 3       | 20.7     |
|       | 21.4  | A0R0W1     | MSMEG_4527                   | 77.0 | RAQVLVPELEKR                | iTRAQ4plex@N-term; User modH on Lys(K)@11   | missed R-A@1; missed K-R@11       | 0.01  | 1824.07 | 609.03   | 1824.06  | 609.03    | 3       | 10.9     |
| 142   | 21.0  | A0R1Y8     | MSMEG_4921                   | 99.0 | GPLGQQLAYR                  | iTRAQ4plex@N-term                           |                                   | 0.03  | 1245.72 | 623.87   | 1245.70  | 623.85    | 2       | 2,265.2  |
|       | 21.0  | A0R1Y8     | MSMEG_4921                   | 99.0 | TSIDALSDR                   | iTRAQ4plex@N-term                           |                                   | 0.02  | 1235.63 | 618.82   | 1235.61  | 618.81    | 2       | 1,456.7  |
| 143   | 20.9  | A0QZ33     | MSMEG_3880                   | 99.0 | LTTDALAFLTER                | iTRAQ4plex@N-term; Dimethyl(R)@12           |                                   | -0.01 | 1521.84 | 761.93   | 1521.85  | 761.93    | 2       | 218.8    |
|       | 20.9  | A0QZ33     | MSMEG_3880                   | 99.0 | LTTDALAFLTER                | iTRAQ4plex@N-term                           |                                   | 0.02  | 1493.84 | 747.93   | 1493.82  | 747.92    | 2       | 689.9    |



Supplement Table 1A

| Index | % Cov | Uniprot ID | Gene locus<br>(M. smegmatis) | Conf       | Peptide Sequence            | Modifications                                               | Cleavages                                | ΔMass        | Prec MW | Prec m/z | Calc. MW | Calc. m/z | Theor z | Area 115 |
|-------|-------|------------|------------------------------|------------|-----------------------------|-------------------------------------------------------------|------------------------------------------|--------------|---------|----------|----------|-----------|---------|----------|
| 144   | 20.7  | A0R4H2     | MSMEG_5832                   | 99.0       | AEILDPOGQAIVGALGR           | iTRAQ4plex@N-term                                           |                                          | -0.02        | 1851.01 | 618.01   | 1851.03  | 618.02    | 3       | 213.6    |
| 145   | 20.5  | A0QU93     | MSMEG_2123                   | 99.0       | DSTFTAGR                    | iTRAQ4plex@N-term                                           |                                          | 0.01         | 997.51  | 499.76   | 997.50   | 499.75    | 2       | 97.6     |
|       | 20.5  | A0QU93     | MSMEG_2123                   | 99.0       | IAGAAAEQGR                  | iTRAQ4plex@N-term                                           |                                          | 0.01         | 1086.61 | 544.31   | 1086.59  | 544.30    | 2       | 105.2    |
|       | 20.5  | A0QU93     | MSMEG_2123                   | 99.0       | LINDPADVIADALR              | iTRAQ4plex@N-term                                           |                                          | -0.02        | 1638.89 | 820.45   | 1638.91  | 820.46    | 2       | 290.8    |
|       | 20.5  | A0QU93     | MSMEG_2123                   | 99.0       | SVTEVADVAR                  | iTRAQ4plex@N-term                                           |                                          | 0.00         | 1189.64 | 595.83   | 1189.64  | 595.83    | 2       | 411.7    |
|       | 20.5  | A0QU93     | MSMEG_2123                   | 78.0       | IAGAAAEQGR                  | No iTRAQ4plex@N-term                                        |                                          | 0.02         | 942.51  | 472.26   | 942.49   | 472.25    | 2       | 17.3     |
| 146   | 20.2  | A0QQF9     | MSMEG_0741                   | 99.0       | FVLGLGVSHGPLVER             | iTRAQ4plex@N-term                                           |                                          | 0.01         | 1723.00 | 575.34   | 1722.99  | 575.34    | 3       | 397.0    |
|       | 20.2  | A0QQF9     | MSMEG_0741                   | 99.0       | LVIGTGIANIHVR               | iTRAQ4plex@N-term                                           |                                          | -0.01        | 1505.91 | 502.98   | 1505.92  | 502.98    | 3       | 210.9    |
|       | 20.2  | A0QQF9     | MSMEG_0741                   | 99.0       | MIELSGTHADGAHPYLVLPQTR      | iTRAQ4plex@N-term                                           |                                          | 0.04         | 2678.40 | 670.61   | 2678.36  | 670.60    | 4       | 58.6     |
| 147   | 20.1  | A0QX20     | MSMEG_3143                   | 99.0       | AINDNDLAVTAVLSGNR           | iTRAQ4plex@N-term                                           |                                          | -0.03        | 1885.97 | 629.66   | 1886.00  | 629.67    | 3       | 132.8    |
|       | 20.1  | A0QX20     | MSMEG_3143                   | 99.0       | AVITESFER                   | iTRAQ4plex@N-term                                           |                                          | 0.02         | 1194.66 | 598.34   | 1194.64  | 598.33    | 2       | 4.383.1  |
|       | 20.1  | A0QX20     | MSMEG_3143                   | 99.0       | IDTPGEADYYR                 | iTRAQ4plex@N-term                                           |                                          | -0.01        | 1442.67 | 722.34   | 1442.68  | 722.35    | 2       | 2.452.5  |
|       | 20.1  | A0QX20     | MSMEG_3143                   | 99.0       | NGGILQYVLR                  | iTRAQ4plex@N-term; Deamidated(N)@1                          |                                          | -0.01        | 1276.72 | 639.37   | 1276.73  | 639.37    | 2       | 274.8    |
|       | 20.1  | A0QX20     | MSMEG_3143                   | 99.0       | NQLLDDVSGGYTR               | iTRAQ4plex@N-term                                           |                                          | 0.01         | 1580.80 | 791.41   | 1580.79  | 791.40    | 2       | 2.476.0  |
|       | 20.1  | A0QX20     | MSMEG_3143                   | 99.0       | TNMAPGGSQVVTDYNNK           | iTRAQ4plex@N-term; iTRAQ4plex(Y)@14; Lys->Gln@16            |                                          | 0.01         | 2075.00 | 692.67   | 2074.99  | 692.67    | 3       | 572.1    |
|       | 20.1  | A0QX20     | MSMEG_3143                   | 99.0       | VLAENLLR                    | iTRAQ4plex@N-term                                           |                                          | -0.02        | 1070.63 | 536.32   | 1070.66  | 536.34    | 2       | 1.989.8  |
|       | 20.1  | A0QX20     | MSMEG_3143                   | 98.0       | AGIPLVLGGK                  | iTRAQ4plex@N-term; Lys->Gln@11                              |                                          | 0.02         | 1166.73 | 584.37   | 1166.71  | 584.36    | 2       | 110.2    |
|       | 20.1  | A0QX20     | MSMEG_3143                   | 95.0       | GTFANIR                     | iTRAQ4plex@N-term                                           |                                          | 0.00         | 921.51  | 461.76   | 921.52   | 461.76    | 2       | 3.297.7  |
|       | 148   | 20.0       | A0QUY3                       | MSMEG_2379 | 11.0                        | VDKAVSEHLATR                                                | iTRAQ4plex@N-term; User modH on Lys(K)@3 | missed K-A@3 | -0.02   | 1711.89  | 428.98   | 1711.92   | 428.98  | 4        |
| 20.0  |       | A0QUY3     | MSMEG_2379                   | 99.0       | AVSEHLATR                   | iTRAQ4plex@N-term                                           |                                          | -0.01        | 1126.61 | 376.54   | 1126.62  | 376.55    | 3       | 73.8     |
| 20.0  |       | A0QUY3     | MSMEG_2379                   | 99.0       | EGTEGPPYTGNGGALR            | iTRAQ4plex@N-term; Deamidated(N)@10                         |                                          | -0.02        | 1622.75 | 812.38   | 1622.77  | 812.39    | 2       | 344.3    |
| 20.0  |       | A0QUY3     | MSMEG_2379                   | 99.0       | TNVLAFAGSLWSR               | iTRAQ4plex@N-term                                           |                                          | -0.02        | 1564.83 | 783.42   | 1564.85  | 783.43    | 2       | 414.8    |
| 149   | 20.0  | A0QX81     | MSMEG_3205                   | 99.0       | ELLSQALENLADAVR             | iTRAQ4plex@N-term                                           |                                          | -0.04        | 1828.92 | 610.65   | 1828.97  | 610.66    | 3       |          |
|       | 20.0  | A0QX81     | MSMEG_3205                   | 99.0       | HSSGLSVQTFRLR               | iTRAQ4plex@N-term                                           |                                          | 0.02         | 1474.82 | 492.61   | 1474.80  | 492.61    | 3       | 340.3    |
|       | 20.0  | A0QX81     | MSMEG_3205                   | 99.0       | GGVDVDAVVPKVRPIVDAVAQR      | iTRAQ4plex@N-term; User modH on Lys(K)@11; Deamidated(Q)@21 | missed K-V@11                            | 0.01         | 2647.47 | 662.88   | 2647.47  | 662.87    | 4       | 126.8    |
|       | 20.0  | A0QX81     | MSMEG_3205                   | 99.0       | AALQVSIQR                   | iTRAQ4plex@N-term                                           |                                          | -0.05        | 1115.59 | 558.80   | 1115.64  | 558.83    | 2       | 1.696.3  |
| 150   | 19.9  | A0R170     | MSMEG_4645                   | 99.0       | LINLTHGEPITFGADGEYAVVK      | iTRAQ4plex@N-term; iTRAQ4plex(Y)@18; Lys->Gln@22            |                                          | 0.07         | 2631.45 | 878.16   | 2631.38  | 878.13    | 3       | 84.8     |
|       | 19.9  | A0R170     | MSMEG_4645                   | 99.0       | LSEQNLDHMVMGIFR             | iTRAQ4plex@N-term                                           |                                          | 0.00         | 1932.97 | 645.33   | 1932.97  | 645.33    | 3       | 506.5    |
|       | 19.9  | A0R170     | MSMEG_4645                   | 99.0       | QQVATAIESRPHDTAALQSLLR      | iTRAQ4plex@N-term                                           |                                          | -0.02        | 2548.37 | 638.10   | 2548.38  | 638.10    | 4       | 154.7    |
|       | 19.9  | A0R170     | MSMEG_4645                   | 99.0       | LSEQNLDHMVMGIFR             | iTRAQ4plex@N-term; Oxidation(M)@11                          |                                          | -0.03        | 1948.94 | 650.65   | 1948.96  | 650.66    | 3       | 126.7    |
|       | 19.9  | A0R170     | MSMEG_4645                   | 99.0       | LSEQNLDHMVMGIFR             | iTRAQ4plex@N-term; Dimethyl(R)@15                           |                                          | -0.03        | 1960.97 | 654.66   | 1961.00  | 654.67    | 3       | 130.2    |
|       | 19.9  | A0R170     | MSMEG_4645                   | 98.0       | LSEQNLDHMVMGIFR             | iTRAQ4plex@N-term                                           |                                          | 0.01         | 1932.97 | 645.33   | 1932.97  | 645.33    | 3       | 71.3     |
|       | 19.9  | A0R170     | MSMEG_4645                   | 92.0       | PHDTAALQSLLR                | No iTRAQ4plex@N-term                                        | cleaved R-P@N-term                       | -0.03        | 1320.68 | 441.24   | 1320.71  | 441.25    | 3       | 83.6     |
|       | 19.9  | A0R170     | MSMEG_4645                   | 77.0       | DFTSDQEVRR                  | iTRAQ4plex@N-term                                           |                                          | -0.01        | 1239.57 | 620.79   | 1239.59  | 620.80    | 2       | 80.3     |
|       | 151   | 19.6       | A0QS46                       | MSMEG_1347 | 99.0                        | LAENYGAALDEVLR                                              | iTRAQ4plex@N-term                        |              | 0.02    | 1676.91  | 839.46   | 1676.89   | 839.45  | 2        |
| 19.6  |       | A0QS46     | MSMEG_1347                   | 99.0       | LAENYGAALDEVLR              | iTRAQ4plex@N-term; Dimethyl(R)@14                           |                                          | -0.01        | 1704.91 | 569.31   | 1704.92  | 569.31    | 3       | 105.3    |
| 19.6  |       | A0QS46     | MSMEG_1347                   | 98.0       | TGTVTPDVAK                  | iTRAQ4plex@N-term; Lys->Gln@10                              |                                          | 0.04         | 1131.63 | 566.82   | 1131.59  | 566.80    | 2       | 298.6    |
| 19.6  |       | A0QS46     | MSMEG_1347                   | 98.0       | VAVFAVGEK                   | iTRAQ4plex@N-term; Lys->Gln@9                               |                                          | 0.03         | 1062.61 | 532.31   | 1062.58  | 532.30    | 2       | 364.3    |
| 152   | 19.5  | A0R478     | MSMEG_5733                   | 99.0       | GEHLEPGDGPIVGGIDSPAAEHALAAA | iTRAQ4plex@N-term; iTRAQ4plex(H)@23; Lys->Gln@34            |                                          | 0.02         | 3664.87 | 917.22   | 3664.85  | 917.22    | 4       | 198.4    |
|       | 19.5  | A0R478     | MSMEG_5733                   | 99.0       | HAGDAQLLVVGTR               | iTRAQ4plex@N-term                                           |                                          | -0.01        | 1479.82 | 494.28   | 1479.83  | 494.28    | 3       | 384.6    |
| 153   | 19.2  | A0QR08     | MSMEG_0943                   | 99.0       | ATVTSAPAGTAAGLR             | iTRAQ4plex@N-term                                           |                                          | 0.03         | 1516.86 | 759.44   | 1516.83  | 759.42    | 2       | 324.6    |
|       | 19.2  | A0QR08     | MSMEG_0943                   | 99.0       | LDQVNAAGGAALDTTTPAQLR       | iTRAQ4plex@N-term                                           |                                          | 0.02         | 2125.14 | 709.39   | 2125.12  | 709.38    | 3       | 116.0    |
| 154   | 19.2  | A0R012     | MSMEG_4222                   | 99.0       | GADMVFVTAGEGGGTGTGGAPVVASIA | iTRAQ4plex@N-term                                           |                                          | 0.00         | 2648.34 | 883.79   | 2648.33  | 883.79    | 3       |          |
|       | 19.2  | A0R012     | MSMEG_4222                   | 99.0       | GLGAGADPEVGR                | iTRAQ4plex@N-term                                           |                                          | 0.02         | 1241.67 | 621.84   | 1241.65  | 621.83    | 2       | 797.9    |
|       | 19.2  | A0R012     | MSMEG_4222                   | 99.0       | GVMGAGTALMGIGSAR            | iTRAQ4plex@N-term                                           |                                          | -0.02        | 1678.84 | 560.62   | 1678.86  | 560.63    | 3       | 38.9     |
| 155   | 19.0  | A0R072     | MSMEG_4283                   | 99.0       | AIADIAAR                    | iTRAQ4plex@N-term                                           |                                          | -0.01        | 943.55  | 472.78   | 943.56   | 472.79    | 2       | 6.125.2  |
|       | 19.0  | A0R072     | MSMEG_4283                   | 99.0       | EGVNLTFLPFIAR               | iTRAQ4plex@N-term                                           |                                          | 0.01         | 1619.92 | 810.97   | 1619.92  | 810.97    | 2       | 301.8    |
|       | 19.0  | A0R072     | MSMEG_4283                   | 99.0       | IHPNVNASYNEDTK              | iTRAQ4plex@N-term; Lys->Gln@14                              |                                          | 0.05         | 1744.86 | 582.63   | 1744.81  | 582.61    | 3       | 1.030.8  |
|       | 19.0  | A0R072     | MSMEG_4283                   | 99.0       | QAPAASPAAPAAASATPAPALAH     | iTRAQ4plex@N-term                                           |                                          | 0.03         | 2803.55 | 701.89   | 2803.52  | 701.89    | 4       | 112.6    |

Supplement Table 1A

| Index | % Cov | Uniprot ID | Gene locus<br>(M. smegmatis) | Conf | Peptide Sequence              | Modifications                                               | Cleavages                    | ΔMass | Prec MW | Prec m/z | Calc. MW | Calc. m/z | Theor z | Area 115 |
|-------|-------|------------|------------------------------|------|-------------------------------|-------------------------------------------------------------|------------------------------|-------|---------|----------|----------|-----------|---------|----------|
|       | 19.0  | A0R072     | MSMEG_4283                   | 99.0 | RLEEGAFEADLGL                 | iTRAQ4plex@N-term                                           | missed R-L@1                 | -0.01 | 1562.80 | 782.41   | 1562.81  | 782.41    | 2       | 26.1     |
|       | 19.0  | A0R072     | MSMEG_4283                   | 91.0 | AEFAER                        | iTRAQ4plex@N-term                                           |                              | 0.02  | 865.46  | 433.74   | 865.44   | 433.73    | 2       | 85.4     |
| 156   | 19.0  | A0QVB1     | MSMEG_2511                   | 99.0 | ADLVPEDR                      | iTRAQ4plex@N-term                                           |                              | 0.01  | 1057.57 | 529.79   | 1057.55  | 529.78    | 2       | 983.9    |
|       | 19.0  | A0QVB1     | MSMEG_2511                   | 95.0 | LVIVPEGV DVSSLPQPLTLDSFQGLPEA | iTRAQ4plex@N-term                                           |                              | -0.03 | 3801.05 | 951.27   | 3801.08  | 951.28    | 4       | 15.2     |
| 157   | 18.8  | A0R716     | MSMEG_6746                   | 99.0 | ATARPTFDDDLVTDQVR             | iTRAQ4plex@N-term                                           |                              | 0.00  | 2063.04 | 688.69   | 2063.04  | 688.69    | 3       | 286.3    |
|       | 18.8  | A0R716     | MSMEG_6746                   | 99.0 | DSGIDLWR                      | iTRAQ4plex@N-term                                           |                              | -0.01 | 1104.56 | 553.29   | 1104.57  | 553.29    | 2       | 1,056.3  |
|       | 18.8  | A0R716     | MSMEG_6746                   | 99.0 | LGTPLVHQPSYSLLNR              | iTRAQ4plex@N-term                                           |                              | -0.04 | 2051.13 | 684.72   | 2051.16  | 684.73    | 3       | 259.6    |
| 158   | 18.8  | A0QWG8     | MSMEG_2937                   | 99.0 | ATTFYDDPDVLAKVSR              | iTRAQ4plex@N-term; User modH on Lys(K)@13; iTRAQ4plex(S)@15 | missed K-V@13                | 0.02  | 2328.23 | 777.08   | 2328.21  | 777.08    | 3       | 343.5    |
|       | 18.8  | A0QWG8     | MSMEG_2937                   | 99.0 | FTVPFVCGATNLGEALR             | iTRAQ4plex@N-term; Pyridylethyl(C)@7                        |                              | -0.01 | 2043.06 | 682.03   | 2043.07  | 682.03    | 3       | 328.1    |
|       | 18.8  | A0QWG8     | MSMEG_2937                   | 99.0 | ITEGAAMIR                     | iTRAQ4plex@N-term                                           |                              | 0.01  | 1104.62 | 553.32   | 1104.61  | 553.31    | 2       | 2,909.7  |
| 159   | 18.6  | A0QR00     | MSMEG_0935                   | 99.0 | TVLIAAHGNSLR                  | iTRAQ4plex@N-term                                           | cleaved N-S@C-term           | -0.01 | 1394.80 | 465.94   | 1394.81  | 465.94    | 3       | 365.3    |
|       | 18.6  | A0QR00     | MSMEG_0935                   | 98.0 | TVLIAAHGN                     | iTRAQ4plex@N-term                                           |                              | 0.01  | 1038.61 | 520.31   | 1038.59  | 520.30    | 2       | 237.1    |
| 160   | 18.6  | P42829     | MSMEG_3151                   | 99.0 | AVLPIMNPGGGIVGMDFPTR          | iTRAQ4plex@N-term                                           | cleaved K-P@N-term           | -0.01 | 2300.17 | 767.73   | 2300.18  | 767.73    | 3       | 80.4     |
|       | 18.6  | P42829     | MSMEG_3151                   | 99.0 | SALESVNR                      | iTRAQ4plex@N-term                                           |                              | 0.01  | 1018.56 | 510.29   | 1018.55  | 510.28    | 2       | 596.7    |
|       | 18.6  | P42829     | MSMEG_3151                   | 97.0 | PAPLLELDVQNEEHLSTLADR         | No iTRAQ4plex@N-term                                        |                              | -0.02 | 2359.18 | 787.40   | 2359.20  | 787.41    | 3       |          |
| 161   | 18.5  | A0R2G5     | MSMEG_5104                   | 99.0 | AIELSGASNLLFR                 | iTRAQ4plex@N-term                                           | missed K-R@11; missed R-D@12 | 0.00  | 1533.87 | 767.94   | 1533.86  | 767.94    | 2       | 717.3    |
|       | 18.5  | A0R2G5     | MSMEG_5104                   | 99.0 | MVDYVTPSGVVR                  | iTRAQ4plex@N-term                                           |                              | 0.02  | 1366.72 | 684.37   | 1366.70  | 684.36    | 2       | 1,597.8  |
|       | 18.5  | A0R2G5     | MSMEG_5104                   | 99.0 | NSLSGAVEVVKRDGTGITLNEALHAI    | iTRAQ4plex@N-term; User modH on Lys(K)@11; Deamidated(N)@20 |                              | -0.09 | 3052.49 | 764.13   | 3052.58  | 764.15    | 4       | 83.7     |
| 162   | 18.3  | A0QRA6     | MSMEG_1047                   | 99.0 | AALANHLSFADFLR                | iTRAQ4plex@N-term                                           |                              | -0.05 | 1775.90 | 592.97   | 1775.94  | 592.99    | 3       | 217.6    |
|       | 18.3  | A0QRA6     | MSMEG_1047                   | 99.0 | LGVDEGLAEALVCAAAR             | No iTRAQ4plex@N-term; Gly->Pro@2; Pyridylethyl(C)@13        |                              | -0.02 | 1801.92 | 601.65   | 1801.94  | 601.65    | 3       | 15.2     |
| 163   | 18.0  | A0QS36     | MSMEG_1334                   | 99.0 | DFAGADPIAQQMR                 | iTRAQ4plex@N-term                                           |                              | 0.06  | 1562.82 | 782.42   | 1562.76  | 782.39    | 2       | 287.5    |
|       | 18.0  | A0QS36     | MSMEG_1334                   | 99.0 | GVAELLEHR                     | iTRAQ4plex@N-term                                           |                              | -0.03 | 1166.63 | 389.88   | 1166.65  | 389.89    | 3       | 112.6    |
|       | 18.0  | A0QS36     | MSMEG_1334                   | 99.0 | SVPVHVNSHEADWVSQVTGIAR        | iTRAQ4plex@N-term                                           |                              | -0.01 | 2531.29 | 633.83   | 2531.30  | 633.83    | 4       | 64.4     |
| 164   | 17.9  | A0R0R1     | MSMEG_4476                   | 99.0 | QALQAANPLVEALAQAAR            | iTRAQ4plex@N-term                                           | 3                            | -0.02 | 2049.13 | 684.05   | 2049.15  | 684.06    | 3       | 16.3     |
|       | 17.9  | A0R0R1     | MSMEG_4476                   | 99.0 | QALQAANPLVEALAQAAR            | iTRAQ4plex@N-term; Ala->Val@18                              |                              | -0.05 | 2077.12 | 693.38   | 2077.18  | 693.40    | 3       |          |
| 165   | 17.9  | A0R7G8     | MSMEG_6907                   | 99.0 | LDDLAAALPR                    | iTRAQ4plex@N-term                                           |                              | 0.00  | 1197.68 | 599.85   | 1197.68  | 599.85    | 2       | 701.7    |
|       | 17.9  | A0R7G8     | MSMEG_6907                   | 92.0 | TVDHISDGR                     | iTRAQ4plex@N-term                                           |                              | 0.00  | 1142.58 | 381.87   | 1142.58  | 381.87    | 3       | 54.7     |
| 166   | 17.8  | A0QQ65     | MSMEG_0643                   | 99.0 | ASDFYAIQR                     | iTRAQ4plex@N-term                                           | missed K-A@8<br>missed K-A@8 | 0.01  | 1314.67 | 658.34   | 1314.67  | 658.34    | 2       | 1,528.5  |
|       | 17.8  | A0QQ65     | MSMEG_0643                   | 99.0 | DAGADEVADAHVDK                | iTRAQ4plex@N-term; iTRAQ4plex(H)@11; Lys->Gln@14            |                              | 0.04  | 1699.83 | 567.62   | 1699.79  | 567.60    | 3       | 840.8    |
|       | 17.8  | A0QQ65     | MSMEG_0643                   | 99.0 | QAVNYAIDPEALNR                | iTRAQ4plex@N-term                                           |                              | 0.04  | 1716.93 | 573.32   | 1716.89  | 573.30    | 3       | 326.9    |
|       | 17.8  | A0QQ65     | MSMEG_0643                   | 99.0 | QLIAEANPADR                   | iTRAQ4plex@N-term                                           |                              | 0.01  | 1340.72 | 671.37   | 1340.72  | 671.37    | 2       | 204.0    |
|       | 17.8  | A0QQ65     | MSMEG_0643                   | 82.0 | YADGTPIKASDFYAIQR             | iTRAQ4plex@N-term; User modH on Lys(K)@8                    |                              | -0.01 | 2403.20 | 802.07   | 2403.21  | 802.08    | 3       | 400.4    |
|       | 17.8  | A0QQ65     | MSMEG_0643                   | 76.0 | YADGTPIKASDFYAIQR             | iTRAQ4plex@N-term; User modH on Lys(K)@8; iTRAQ4plex(Y)@14  |                              | 0.04  | 2547.35 | 850.12   | 2547.31  | 850.11    | 3       | 56.4     |
| 167   | 17.8  | A0R203     | MSMEG_4939                   | 99.0 | ADEAVIDLAELAVSR               | iTRAQ4plex@N-term                                           |                              | 0.02  | 1714.94 | 572.66   | 1714.92  | 572.65    | 3       |          |
|       | 17.8  | A0R203     | MSMEG_4939                   | 99.0 | VSATTLDLLLR                   | iTRAQ4plex@N-term                                           |                              | 0.01  | 1231.73 | 616.87   | 1231.73  | 616.87    | 2       | 526.1    |
|       | 17.8  | A0R203     | MSMEG_4939                   | 99.0 | WSTESNLIDAVEHTAR              | iTRAQ4plex@N-term                                           |                              | -0.04 | 1971.94 | 658.32   | 1971.98  | 658.33    | 3       | 80.2     |
| 168   | 17.7  | A0R3M3     | MSMEG_5524                   | 99.0 | AGTQIVGGVNR                   | iTRAQ4plex@N-term                                           |                              | 0.03  | 1285.75 | 643.88   | 1285.72  | 643.87    | 2       | 2,341.2  |
|       | 17.7  | A0R3M3     | MSMEG_5524                   | 99.0 | ANVTKPVVGYVAGFTAPEGK          | iTRAQ4plex@N-term; iTRAQ4plex(T)@4; Lys->Gln@5; Lys->Gln@20 |                              | 0.10  | 2292.30 | 765.11   | 2292.20  | 765.07    | 3       | 534.0    |
|       | 17.7  | A0R3M3     | MSMEG_5524                   | 99.0 | VIVMIGEIGGDAEER               | iTRAQ4plex@N-term                                           |                              | 0.02  | 1730.92 | 577.98   | 1730.90  | 577.97    | 3       |          |
| 169   | 17.5  | A0QQJ4     | MSMEG_0777                   | 99.0 | ASAEQFAPR                     | iTRAQ4plex@N-term                                           |                              | 0.03  | 1119.61 | 560.81   | 1119.58  | 560.80    | 2       | 1,835.6  |
|       | 17.5  | A0QQJ4     | MSMEG_0777                   | 99.0 | NLVLTGTSVLTPTFR               | iTRAQ4plex@N-term                                           |                              | -0.01 | 1660.95 | 831.48   | 1660.96  | 831.49    | 2       | 1,254.8  |
| 170   | 17.5  | A0R0Q9     | MSMEG_4474                   | 99.0 | AANTWHASTAIQEAR               | iTRAQ4plex@N-term                                           |                              | 0.04  | 1769.94 | 590.99   | 1769.89  | 590.97    | 3       | 219.3    |
|       | 17.5  | A0R0Q9     | MSMEG_4474                   | 99.0 | ENLSNEVFRPHYTPNTAIAR          | iTRAQ4plex@N-term                                           |                              | 0.00  | 2472.26 | 619.07   | 2472.26  | 619.07    | 4       | 159.0    |
|       | 17.5  | A0R0Q9     | MSMEG_4474                   | 99.0 | GMSPVVEWVR                    | iTRAQ4plex@N-term                                           |                              | -0.01 | 1203.61 | 602.81   | 1203.62  | 602.82    | 2       | 1,036.2  |
|       | 17.5  | A0R0Q9     | MSMEG_4474                   | 99.0 | IMAAAGAAEDGFR                 | iTRAQ4plex@N-term                                           |                              | -0.02 | 1422.68 | 712.35   | 1422.70  | 712.36    | 2       | 1,077.1  |
|       | 17.5  | A0R0Q9     | MSMEG_4474                   | 99.0 | TAAQTIIQTILDTR                | iTRAQ4plex@N-term                                           |                              | 0.01  | 1687.96 | 844.99   | 1687.96  | 844.99    | 2       | 769.9    |

Supplement Table 1A

| Index | % Cov | Uniprot ID | Gene locus<br>(M. smegmatis) | Conf | Peptide Sequence        | Modifications                                              | Cleavages                                 | ΔMass | Prec MW | Prec m/z | Calc. MW | Calc. m/z | Theor z | Area 115 |
|-------|-------|------------|------------------------------|------|-------------------------|------------------------------------------------------------|-------------------------------------------|-------|---------|----------|----------|-----------|---------|----------|
| 171   | 17.5  | A0R0Q9     | MSMEG_4474                   | 99.0 | ENLSNEVFRPHYPNTAIAR     | iTRAQ4plex@N-term                                          |                                           | -0.10 | 2472.16 | 619.05   | 2472.26  | 619.07    | 4       | 561.3    |
|       | 17.3  | A0QPE7     | MSMEG_0372                   | 99.0 | ELYTFFTPLLR             | iTRAQ4plex@N-term                                          |                                           | 0.00  | 1542.86 | 772.44   | 1542.86  | 772.44    | 2       | 655.9    |
|       | 17.3  | A0QPE7     | MSMEG_0372                   | 99.0 | GIGATIAEVFAR            | iTRAQ4plex@N-term                                          |                                           | -0.01 | 1347.75 | 674.88   | 1347.76  | 674.89    | 2       | 813.6    |
|       | 17.3  | A0QPE7     | MSMEG_0372                   | 99.0 | SAYVDGQVFR              | iTRAQ4plex@N-term                                          |                                           | 0.01  | 1284.67 | 643.34   | 1284.66  | 643.34    | 2       | 2,324.4  |
|       | 17.3  | A0QPE7     | MSMEG_0372                   | 99.0 | VDILVNNAGITR            | iTRAQ4plex@N-term                                          |                                           | -0.01 | 1427.81 | 714.91   | 1427.82  | 714.92    | 2       | 639.7    |
|       | 17.3  | A0QPE7     | MSMEG_0372                   | 99.0 | GIGATIAEVFAR            | iTRAQ4plex@N-term                                          |                                           | 0.00  | 1347.76 | 674.89   | 1347.76  | 674.89    | 2       | 293.2    |
|       | 17.3  | A0QPE7     | MSMEG_0372                   | 97.0 | MTEAIPLATR              | iTRAQ4plex@N-term                                          |                                           | 0.00  | 1245.69 | 623.85   | 1245.69  | 623.85    | 2       | 1,439.1  |
| 172   | 17.1  | A0QNZ7     | MSMEG_0220                   | 99.0 | DLSEFVEDFR              | iTRAQ4plex@N-term                                          |                                           | 0.03  | 1399.71 | 700.86   | 1399.67  | 700.84    | 2       | 261.6    |
|       | 17.1  | A0QNZ7     | MSMEG_0220                   | 99.0 | FGAAGLLVYALDHR          | iTRAQ4plex@N-term                                          |                                           | 0.00  | 1645.91 | 549.64   | 1645.91  | 549.64    | 3       | 52.2     |
| 173   | 17.1  | A0QT08     | MSMEG_1670                   | 99.0 | YAPTIVDLAPR             | iTRAQ4plex@N-term                                          |                                           | 0.01  | 1358.78 | 680.40   | 1358.77  | 680.39    | 2       | 386.3    |
|       | 17.1  | A0QT08     | MSMEG_1670                   | 98.0 | SMVLEVLGR               | iTRAQ4plex@N-term                                          |                                           | -0.01 | 1275.69 | 638.85   | 1275.70  | 638.86    | 2       | 932.4    |
|       | 17.1  | A0QT08     | MSMEG_1670                   | 97.0 | AAVEAGPR                | iTRAQ4plex@N-term                                          |                                           | 0.00  | 913.51  | 457.76   | 913.51   | 457.76    | 2       | 42.3     |
| 174   | 17.0  | A0R3N8     | MSMEG_5538                   | 99.0 | GEVAYGAFFR              | iTRAQ4plex@N-term                                          |                                           | 0.01  | 1388.69 | 695.35   | 1388.68  | 695.35    | 2       | 1,315.4  |
|       | 17.0  | A0R3N8     | MSMEG_5538                   | 99.0 | VAETIQSGMVGINR          | iTRAQ4plex@N-term                                          |                                           | 0.00  | 1617.86 | 809.94   | 1617.86  | 809.94    | 2       | 463.2    |
|       | 17.0  | A0R3N8     | MSMEG_5538                   | 97.0 | GLDPSSTLGPLNSK          | iTRAQ4plex@N-term; iTRAQ4plex(S)@14; Lys->Gln@15           |                                           | 0.03  | 1786.00 | 596.34   | 1785.97  | 596.33    | 3       | 142.6    |
| 175   | 17.0  | A0QR89     | MSMEG_1028                   | 99.0 | HAESAGAEVR              | iTRAQ4plex@N-term                                          |                                           | 0.00  | 1169.59 | 390.87   | 1169.59  | 390.87    | 3       | 51.1     |
|       | 17.0  | A0QR89     | MSMEG_1028                   | 99.0 | MGLADEVATYHR            | iTRAQ4plex@N-term                                          |                                           | 0.00  | 1505.74 | 502.92   | 1505.74  | 502.92    | 3       | 341.5    |
|       | 17.0  | A0QR89     | MSMEG_1028                   | 99.0 | VTVFSPSEWELSFPR         | iTRAQ4plex@N-term                                          |                                           | -0.01 | 1923.98 | 642.33   | 1923.99  | 642.34    | 3       | 27.2     |
|       | 17.0  | A0QR89     | MSMEG_1028                   | 91.0 | AESAGAEVR               | iTRAQ4plex@N-term                                          | cleaved H-A@N-term                        | 0.02  | 1032.55 | 517.28   | 1032.53  | 517.27    | 2       | 46.7     |
| 176   | 16.8  | A0R609     | MSMEG_6384                   | 99.0 | ANLLGLSAPEMTTLVGGLR     | iTRAQ4plex@N-term                                          |                                           | -0.01 | 2056.13 | 686.39   | 2056.15  | 686.39    | 3       |          |
|       | 16.8  | A0R609     | MSMEG_6384                   | 99.0 | LQPQLGWEANEPDELAQVVR    | iTRAQ4plex@N-term                                          |                                           | -0.06 | 2435.20 | 812.74   | 2435.26  | 812.76    | 3       | 147.3    |
|       | 16.8  | A0R609     | MSMEG_6384                   | 99.0 | THPSMLTSDLALR           | iTRAQ4plex@N-term                                          |                                           | -0.01 | 1584.83 | 529.28   | 1584.84  | 529.29    | 3       | 484.0    |
|       | 16.8  | A0R609     | MSMEG_6384                   | 99.0 | VDPIYEQITR              | iTRAQ4plex@N-term                                          |                                           | 0.00  | 1376.74 | 689.38   | 1376.74  | 689.38    | 2       | 805.9    |
|       | 16.8  | A0R609     | MSMEG_6384                   | 80.0 | DMGPVTR                 | iTRAQ4plex@N-term                                          |                                           | -0.01 | 918.46  | 460.24   | 918.47   | 460.24    | 2       | 116.8    |
|       | 16.7  | A0QSL6     | MSMEG_1522                   | 99.0 | STPFAAQLAAENAAR         | iTRAQ4plex@N-term                                          |                                           | 0.00  | 1660.86 | 831.44   | 1660.87  | 831.44    | 2       | 1,141.9  |
| 177   | 16.7  | A0QSL6     | MSMEG_1522                   | 99.0 | STPFAAQLAAENAAR         | iTRAQ4plex@N-term                                          |                                           | 0.00  | 1660.87 | 831.44   | 1660.87  | 831.44    | 3       | 418.9    |
|       | 16.7  | A0QSL6     | MSMEG_1522                   | 99.0 | GSRKSTPFAAQLAAENAAR     | No iTRAQ4plex@N-term; User modH on Lys(K)@4                | missed R-K@3; missed K-S@4                | 0.06  | 2188.18 | 730.40   | 2188.12  | 730.38    | 3       | 295.9    |
|       | 16.7  | A0QSL6     | MSMEG_1522                   | 99.0 | GSRKSTPFAAQLAAENAAR     | No iTRAQ4plex@N-term; User modH on Lys(K)@4                |                                           | 0.06  | 2188.18 | 730.40   | 2188.12  | 730.38    | 3       | 295.9    |
| 178   | 16.7  | A0QTD7     | MSMEG_1803                   | 99.0 | SAVPDATLVLR             | iTRAQ4plex@N-term                                          |                                           | 0.01  | 1284.76 | 643.39   | 1284.75  | 643.38    | 2       | 1,678.0  |
|       | 16.7  | A0QTD7     | MSMEG_1803                   | 99.0 | VAAMLENLAVVR            | iTRAQ4plex@N-term                                          |                                           | -0.01 | 1428.82 | 715.42   | 1428.82  | 715.42    | 2       | 831.0    |
| 179   | 16.7  | A0R0A1     | MSMEG_4313                   | 99.0 | LDELGIAHGGIVDAPYSGLSFR  | iTRAQ4plex@N-term                                          |                                           | 0.05  | 2487.34 | 830.12   | 2487.29  | 830.10    | 3       | 134.0    |
| 180   | 16.5  | A0QXC8     | MSMEG_3255                   | 99.0 | GAELAETAR               | iTRAQ4plex@N-term                                          |                                           | -0.01 | 1060.55 | 531.28   | 1060.56  | 531.29    | 2       | 121.9    |
| 181   | 16.3  | A0QU45     | MSMEG_2072                   | 99.0 | AVGHDLPSALLR            | iTRAQ4plex@N-term                                          |                                           | -0.01 | 1391.79 | 464.94   | 1391.80  | 464.94    | 3       | 81.3     |
|       | 16.3  | A0QU45     | MSMEG_2072                   | 99.0 | MDLPTHVDIR              | iTRAQ4plex@N-term                                          |                                           | 0.00  | 1339.70 | 447.57   | 1339.70  | 447.58    | 3       | 187.1    |
|       | 16.3  | A0QU45     | MSMEG_2072                   | 99.0 | VLDIVSAAVEYGADR         | iTRAQ4plex@N-term                                          |                                           | 0.01  | 1720.92 | 574.65   | 1720.91  | 574.64    | 3       |          |
| 182   | 16.3  | A0QYS6     | MSMEG_3770                   | 99.0 | ALESFVAHTQEHVSGEIR      | iTRAQ4plex@N-term                                          |                                           | 0.00  | 2153.10 | 539.28   | 2153.10  | 539.28    | 4       | 108.1    |
|       | 16.3  | A0QYS6     | MSMEG_3770                   | 99.0 | GVPVSDGRPVSVLQAIIEELNR  | iTRAQ4plex@N-term                                          |                                           | -0.03 | 2491.36 | 831.46   | 2491.39  | 831.47    | 3       | 139.6    |
|       | 16.3  | A0QYS6     | MSMEG_3770                   | 99.0 | GVPVSDGRPVSVLQAIIEELNRR | iTRAQ4plex@N-term                                          | missed R-R@22                             | -0.02 | 2647.47 | 662.88   | 2647.49  | 662.88    | 4       | 126.8    |
|       | 16.3  | A0QYS6     | MSMEG_3770                   | 96.0 | AIAFAEENAIPIVTK         | iTRAQ4plex@N-term; iTRAQ4plex(T)@15; Lys->Gln@16           |                                           | 0.02  | 1988.10 | 663.71   | 1988.08  | 663.70    | 3       | 93.5     |
| 183   | 16.3  | A0QSD2     | MSMEG_1437                   | 99.0 | IHAVTELVEGQTPSTK        | iTRAQ4plex@N-term; Lys->Gln@16                             |                                           | 0.04  | 1853.01 | 618.68   | 1852.97  | 618.66    | 3       | 808.9    |
|       | 16.3  | A0QSD2     | MSMEG_1437                   | 99.0 | IHAVTELVEGQTPSTK        | No iTRAQ4plex@N-term; iTRAQ4plex(T)@15; Lys->Gln@16        |                                           | 0.05  | 1853.02 | 618.68   | 1852.97  | 618.66    | 3       | 337.5    |
|       | 16.3  | A0QSD2     | MSMEG_1437                   | 95.0 | GALSDR                  | iTRAQ4plex@N-term                                          |                                           | 0.00  | 761.42  | 381.72   | 761.42   | 381.71    | 2       | 44.3     |
| 184   | 16.2  | A0R0I8     | MSMEG_4401                   | 99.0 | AAYAHPVPLPGVDAIR        | iTRAQ4plex@N-term                                          |                                           | -0.02 | 2113.13 | 705.38   | 2113.14  | 705.39    | 3       | 310.0    |
|       | 16.2  | A0R0I8     | MSMEG_4401                   | 99.0 | AMEHSGVQDISR            | iTRAQ4plex@N-term                                          |                                           | -0.02 | 1472.70 | 491.91   | 1472.72  | 491.91    | 3       | 200.9    |
| 185   | 16.1  | A0QUY9     | MSMEG_2387                   | 99.0 | AQAESGLDQIFTAAGAQRW     | iTRAQ4plex@N-term                                          |                                           | -0.05 | 2292.07 | 765.03   | 2292.13  | 765.05    | 3       | 272.7    |
|       | 16.1  | A0QUY9     | MSMEG_2387                   | 76.0 | VVADVLRGRKVDGVR         | iTRAQ4plex@N-term; User modH on Lys(K)@10; Oxidation(D)@13 | missed R-G@7; missed R-K@9; missed R-K@10 | 0.12  | 2112.33 | 705.12   | 2112.21  | 705.08    | 3       | 67.7     |
|       | 16.1  | A0QUY9     | MSMEG_2387                   | 76.0 | VVADVLRGRKVDGVR         | iTRAQ4plex@N-term; Deamidated(R)@9; User modH on Lys(K)@10 | missed R-G@7; missed R-K@9; missed R-K@10 | 0.02  | 2097.22 | 525.31   | 2097.20  | 525.31    | 4       | 2,108.0  |

Supplement Table 1A

| Index | % Cov | Uniprot ID | Gene locus<br>(M. smegmatis) | Conf | Peptide Sequence          | Modifications                                    | Cleavages                    | ΔMass | Prec MW | Prec m/z | Calc. MW | Calc. m/z | Theor z | Area 115 |
|-------|-------|------------|------------------------------|------|---------------------------|--------------------------------------------------|------------------------------|-------|---------|----------|----------|-----------|---------|----------|
| 186   | 16.1  | A0R2U7     | MSMEG_5239                   | 99.0 | GAMFDPSAVFYMNK            | iTRAQ4plex@N-term; iTRAQ4plex(Y)@11; Lys->Gln@14 |                              | 0.01  | 1864.89 | 622.64   | 1864.87  | 622.63    | 3       | 194.8    |
|       | 16.1  | A0R2U7     | MSMEG_5239                   | 98.0 | NLALELVR                  | iTRAQ4plex@N-term                                |                              | 0.01  | 1070.67 | 536.34   | 1070.66  | 536.34    | 2       | 567.2    |
| 187   | 16.0  | A0QS62     | MSMEG_1364                   | 99.0 | ASTATVVTEYR               | iTRAQ4plex@N-term                                |                              | 0.02  | 1340.73 | 671.37   | 1340.71  | 671.36    | 2       | 1.880.6  |
| 188   | 15.8  | A0QUY6     | MSMEG_2382                   | 99.0 | EIAEHPFGNPNFTGR           | iTRAQ4plex@N-term                                |                              | 0.06  | 1828.95 | 610.66   | 1828.90  | 610.64    | 3       | 372.2    |
|       | 15.8  | A0QUY6     | MSMEG_2382                   | 99.0 | TEVNGQVR                  | iTRAQ4plex@N-term                                |                              | 0.01  | 1045.58 | 523.80   | 1045.56  | 523.79    | 2       | 71.6     |
|       | 15.8  | A0QUY6     | MSMEG_2382                   | 99.0 | TSLLLHDIGR                | iTRAQ4plex@N-term                                |                              | -0.01 | 1267.73 | 423.58   | 1267.74  | 423.59    | 3       | 476.5    |
| 189   | 15.8  | A0QU58     | MSMEG_2086                   | 99.0 | LREDIEAMEVR               | iTRAQ4plex@N-term                                | missed R-E@2                 | 0.02  | 1503.80 | 502.28   | 1503.78  | 502.27    | 3       | 176.1    |
|       | 15.8  | A0QU58     | MSMEG_2086                   | 99.0 | SGAGGVDAADWAEMLMR         | iTRAQ4plex@N-term                                |                              | -0.01 | 1879.86 | 627.63   | 1879.87  | 627.63    | 3       | 23.9     |
|       | 15.8  | A0QU58     | MSMEG_2086                   | 96.0 | EAVVTIR                   | iTRAQ4plex@N-term                                |                              | 0.00  | 930.56  | 466.29   | 930.56   | 466.29    | 2       | 193.6    |
| 190   | 15.6  | A0QW25     | MSMEG_2782                   | 99.0 | GLYDVAGLR                 | iTRAQ4plex@N-term                                |                              | -0.01 | 1106.61 | 554.31   | 1106.62  | 554.32    | 2       | 1.365.4  |
|       | 15.6  | A0QW25     | MSMEG_2782                   | 99.0 | LDFDALNSTIR               | iTRAQ4plex@N-term                                |                              | -0.01 | 1407.74 | 704.88   | 1407.75  | 704.88    | 2       | 1.040.1  |
|       | 15.6  | A0QW25     | MSMEG_2782                   | 98.0 | EETPFPTGPR                | iTRAQ4plex@N-term                                |                              | 0.01  | 1323.66 | 662.84   | 1323.66  | 662.84    | 2       | 2.667.0  |
| 191   | 15.6  | A0R199     | MSMEG_4674                   | 99.0 | GAVLEQVVNDALPSR           | iTRAQ4plex@N-term                                |                              | 0.01  | 1710.95 | 856.48   | 1710.94  | 856.48    | 2       | 520.0    |
|       | 15.6  | A0R199     | MSMEG_4674                   | 93.0 | EEFDAETR                  | iTRAQ4plex@N-term                                |                              | 0.01  | 1139.53 | 570.77   | 1139.52  | 570.77    | 2       | 3.124.2  |
| 192   | 15.5  | A0QNZ3     | MSMEG_0216                   | 99.0 | ALVNSAGIGWAQR             | iTRAQ4plex@N-term                                |                              | 0.05  | 1485.86 | 743.94   | 1485.82  | 743.92    | 2       | 1.456.8  |
|       | 15.5  | A0QNZ3     | MSMEG_0216                   | 99.0 | DLSAVGIR                  | iTRAQ4plex@N-term                                |                              | -0.01 | 973.56  | 487.79   | 973.57   | 487.79    | 2       | 1.427.4  |
|       | 15.5  | A0QNZ3     | MSMEG_0216                   | 99.0 | GGVVGLTLPVAR              | iTRAQ4plex@N-term                                |                              | -0.01 | 1281.78 | 641.90   | 1281.79  | 641.90    | 2       | 988.3    |
|       | 15.5  | A0QNZ3     | MSMEG_0216                   | 98.0 | AAELGPLR                  | iTRAQ4plex@N-term                                |                              | 0.01  | 969.59  | 485.80   | 969.57   | 485.79    | 2       | 1.497.8  |
| 193   | 15.4  | A0R2V3     | MSMEG_5245                   | 99.0 | DAPLSVMTTWQHR             | iTRAQ4plex@N-term                                |                              | -0.03 | 1684.82 | 562.61   | 1684.85  | 562.62    | 3       | 730.2    |
|       | 15.4  | A0R2V3     | MSMEG_5245                   | 99.0 | GGIGSVASAVLR              | iTRAQ4plex@N-term                                |                              | 0.01  | 1229.74 | 615.88   | 1229.72  | 615.87    | 2       | 1.186.0  |
|       | 15.4  | A0R2V3     | MSMEG_5245                   | 95.0 | LAQSQLDR                  | iTRAQ4plex@N-term                                |                              | 0.02  | 1073.61 | 537.81   | 1073.60  | 537.80    | 2       | 900.9    |
| 194   | 15.3  | A0QSL5     | MSMEG_1521                   | 99.0 | SNEILAATGIDK              | iTRAQ4plex@N-term; Lys->Gln@12                   |                              | 0.05  | 1374.76 | 688.39   | 1374.71  | 688.36    | 2       | 338.2    |
| 195   | 15.3  | A0R2W9     | MSMEG_5261                   | 99.0 | GDFFHAPIEWQQR             | iTRAQ4plex@N-term                                |                              | 0.01  | 1773.88 | 592.30   | 1773.87  | 592.30    | 3       | 48.9     |
|       | 15.3  | A0R2W9     | MSMEG_5261                   | 99.0 | WLEHWDPDNDVFANR           | iTRAQ4plex@N-term                                |                              | -0.02 | 2056.93 | 686.65   | 2056.95  | 686.66    | 3       | 108.1    |
| 196   | 15.1  | A0R202     | MSMEG_4938                   | 99.0 | ALELQAPSVVQR              | iTRAQ4plex@N-term                                |                              | -0.01 | 1453.83 | 727.92   | 1453.84  | 727.93    | 2       | 398.2    |
|       | 15.1  | A0R202     | MSMEG_4938                   | 99.0 | FESELLEHVK                | iTRAQ4plex@N-term; Lys->Gln@10                   |                              | 0.02  | 1373.71 | 458.91   | 1373.69  | 458.91    | 3       | 91.2     |
|       | 15.1  | A0R202     | MSMEG_4938                   | 97.0 | LVSVINFEK                 | iTRAQ4plex@N-term; Lys->Gln@9                    |                              | 0.03  | 1191.70 | 596.86   | 1191.66  | 596.84    | 2       | 825.7    |
|       | 15.1  | A0R202     | MSMEG_4938                   | 95.0 | AISLLLR                   | iTRAQ4plex@N-term                                |                              | -0.03 | 928.59  | 465.30   | 928.62   | 465.32    | 2       | 494.4    |
| 197   | 15.1  | A0QT22     | MSMEG_1684                   | 99.0 | FFNGNPVLSVGGGIEAFSGR      | iTRAQ4plex@N-term                                |                              | -0.07 | 2269.09 | 757.37   | 2269.16  | 757.39    | 3       | 67.9     |
|       | 15.1  | A0QT22     | MSMEG_1684                   | 99.0 | GDLYTLWAPR                | iTRAQ4plex@N-term                                |                              | 0.00  | 1334.71 | 668.36   | 1334.71  | 668.36    | 2       | 552.4    |
| 198   | 14.3  | A0QVQ8     | MSMEG_2659                   | 99.0 | LSAQVGAYHLMR              | iTRAQ4plex@N-term                                |                              | -0.03 | 1488.77 | 497.26   | 1488.80  | 497.27    | 3       | 441.5    |
| 199   | 14.2  | A0R067     | MSMEG_4278                   | 99.0 | TEMGYPHLGHESLDISPLQAR     | iTRAQ4plex@N-term                                |                              | 0.04  | 2607.36 | 652.85   | 2607.32  | 652.84    | 4       | 101.9    |
|       | 14.2  | A0R067     | MSMEG_4278                   | 98.0 | GPAAAYVNSALTNDLGK         | iTRAQ4plex@N-term; iTRAQ4plex(T)@13; Lys->Gln@18 |                              | 0.05  | 2006.08 | 669.70   | 2006.03  | 669.68    | 3       | 137.5    |
| 200   | 14.1  | A0QUV6     | MSMEG_2351                   | 99.0 | DDGLHGSDLIQTAWTLAR        | iTRAQ4plex@N-term                                |                              | 0.03  | 2112.10 | 705.04   | 2112.07  | 705.03    | 3       | 62.7     |
|       | 14.1  | A0QUV6     | MSMEG_2351                   | 99.0 | EAADAVLDEINER             | iTRAQ4plex@N-term                                |                              | 0.01  | 1587.80 | 794.91   | 1587.79  | 794.90    | 2       | 595.9    |
| 201   | 14.0  | A0QWY3     | MSMEG_3106                   | 99.0 | ADAIGVNFIDTYFR            | iTRAQ4plex@N-term                                |                              | 0.01  | 1744.90 | 873.46   | 1744.89  | 873.45    | 2       | 420.1    |
|       | 14.0  | A0QWY3     | MSMEG_3106                   | 99.0 | GTLALFGASSGPVPPFDPPQR     | iTRAQ4plex@N-term                                |                              | -0.06 | 2157.07 | 720.03   | 2157.13  | 720.05    | 3       | 45.7     |
|       | 14.0  | A0QWY3     | MSMEG_3106                   | 99.0 | ITVGGTYPLAEASR            | iTRAQ4plex@N-term                                |                              | 0.00  | 1577.85 | 789.93   | 1577.85  | 789.93    | 2       | 1.430.3  |
| 202   | 14.0  | A0R5M8     | MSMEG_6247                   | 99.0 | FRPENVAELAEAGLR           | iTRAQ4plex@N-term                                |                              | 0.02  | 1914.06 | 639.03   | 1914.04  | 639.02    | 3       | 19.6     |
|       | 14.0  | A0R5M8     | MSMEG_6247                   | 98.0 | ELSADFDLDAFEHVAKWNSDEERIE | iTRAQ4plex@N-term; User modH on Lys(K)@16        | missed K-W@16; missed R-I@23 | -0.24 | 3937.61 | 788.53   | 3937.86  | 788.58    | 5       |          |
| 203   | 14.0  | A0QS85     | MSMEG_1387                   | 99.0 | EGGEWGLDEVHALGALSGSR      | iTRAQ4plex@N-term                                |                              |       | 0.00    | 2183.07  | 728.70   | 2183.07   | 728.70  | 3        |
|       | 14.0  | A0QS85     | MSMEG_1387                   | 99.0 | GVPTIEMVNLTR              | iTRAQ4plex@N-term                                |                              | 0.03  | 1585.93 | 793.97   | 1585.90  | 793.96    | 2       | 277.1    |

Supplement Table 1A

| Index | % Cov | Uniprot ID | Gene locus<br>(M. smegmatis) | Conf | Peptide Sequence          | Modifications                                   | Cleavages                         | ΔMass | Prec MW | Prec m/z | Calc. MW | Calc. m/z | Theor z | Area 115 |
|-------|-------|------------|------------------------------|------|---------------------------|-------------------------------------------------|-----------------------------------|-------|---------|----------|----------|-----------|---------|----------|
| 204   | 13.9  | A0R0B0     | MSMEG_4323                   | 99.0 | ANDGAYVR                  | iTRAQ4plex@N-term                               |                                   | 0.00  | 1008.51 | 505.26   | 1008.51  | 505.26    | 2       | 113.9    |
|       | 13.9  | A0R0B0     | MSMEG_4323                   | 99.0 | EWDVLLHADR                | iTRAQ4plex@N-term                               |                                   | -0.02 | 1396.70 | 466.57   | 1396.72  | 466.58    | 3       | 186.9    |
|       | 13.9  | A0R0B0     | MSMEG_4323                   | 99.0 | GYTLGQHFEGR               | iTRAQ4plex@N-term                               |                                   | 0.01  | 1407.71 | 470.24   | 1407.70  | 470.24    | 3       | 271.3    |
|       | 13.9  | A0R0B0     | MSMEG_4323                   | 99.0 | IQELESFFR                 | iTRAQ4plex@N-term                               |                                   | -0.01 | 1424.77 | 713.39   | 1424.78  | 713.40    | 2       | 168.3    |
|       | 13.9  | A0R0B0     | MSMEG_4323                   | 99.0 | LTTDQLDGFR                | iTRAQ4plex@N-term                               |                                   | 0.03  | 1308.71 | 655.36   | 1308.68  | 655.35    | 2       | 768.9    |
|       | 13.9  | A0R0B0     | MSMEG_4323                   | 99.0 | QDLAQNSSTAAEPDR           | iTRAQ4plex@N-term                               |                                   | 0.00  | 1745.83 | 582.95   | 1745.83  | 582.95    | 3       | 26.1     |
| 205   | 13.9  | A0QV45     | MSMEG_2443                   | 99.0 | DIVGQFSYVVETER            | iTRAQ4plex@N-term                               |                                   | 0.02  | 1784.92 | 595.98   | 1784.91  | 595.98    | 3       | 19.6     |
| 206   | 13.8  | A0R2X8     | MSMEG_5270                   | 99.0 | ELLSAVFEGR                | iTRAQ4plex@N-term                               |                                   | 0.01  | 1263.70 | 632.86   | 1263.69  | 632.85    | 2       | 767.6    |
|       | 13.8  | A0R2X8     | MSMEG_5270                   | 99.0 | ITHFVAGVGTGGTITGTGR       | iTRAQ4plex@N-term                               |                                   | 0.04  | 1945.09 | 649.37   | 1945.05  | 649.36    | 3       | 205.4    |
| 207   | 13.8  | A0R472     | MSMEG_5727                   | 99.0 | NNFEVHSEDR                | iTRAQ4plex@N-term                               |                                   | 0.01  | 1389.65 | 464.23   | 1389.64  | 464.22    | 3       | 51.8     |
|       | 13.8  | A0R472     | MSMEG_5727                   | 87.0 | EAGHDSAIVR                | iTRAQ4plex@N-term                               |                                   | 0.00  | 1197.62 | 400.21   | 1197.62  | 400.21    | 3       | 15.2     |
| 208   | 13.2  | A0R0E9     | MSMEG_4362                   | 99.0 | AAAIIVGSR                 | iTRAQ4plex@N-term                               |                                   | 0.01  | 986.61  | 494.31   | 986.60   | 494.31    | 2       | 1,077.8  |
| 209   | 13.2  | A0R4G4     | MSMEG_5824                   | 99.0 | LLAEVLTAAASR              | iTRAQ4plex@N-term                               |                                   | -0.01 | 1286.76 | 644.39   | 1286.77  | 644.39    | 2       | 157.2    |
|       | 13.2  | A0R4G4     | MSMEG_5824                   | 99.0 | VESHNHPSYVEPYQGAATGVGGIVR | iTRAQ4plex@N-term                               |                                   | 0.02  | 2767.40 | 692.86   | 2767.38  | 692.85    | 4       | 123.8    |
|       | 13.2  | A0R4G4     | MSMEG_5824                   | 82.0 | IILFGAR                   | iTRAQ4plex@N-term                               |                                   | -0.03 | 932.56  | 467.29   | 932.59   | 467.30    | 2       | 742.6    |
| 210   | 13.2  | A0R3M4     | MSMEG_5525                   | 99.0 | GVDLAFAR                  | iTRAQ4plex@N-term                               |                                   | -0.02 | 991.54  | 496.78   | 991.56   | 496.79    | 2       | 4,338.8  |
|       | 13.2  | A0R3M4     | MSMEG_5525                   | 99.0 | YAATPDDAFTHANNILGLDIK     | iTRAQ4plex@N-term; Lys->Gln@21                  |                                   | 0.01  | 2403.20 | 802.07   | 2403.18  | 802.07    | 3       | 400.4    |
| 211   | 13.2  | A0R1G3     | MSMEG_4742                   | 99.0 | AALDEILHSWR               | iTRAQ4plex@N-term                               |                                   | -0.03 | 1453.75 | 485.59   | 1453.78  | 485.60    | 3       | 173.6    |
|       | 13.2  | A0R1G3     | MSMEG_4742                   | 99.0 | VGVGPTEDTEILR             | iTRAQ4plex@N-term                               |                                   | 0.00  | 1528.82 | 765.42   | 1528.82  | 765.42    | 2       | 415.6    |
| 212   | 13.2  | A0QX96     | MSMEG_3220                   | 99.0 | GDQTFLELDR                | iTRAQ4plex@N-term                               |                                   | -0.01 | 1451.69 | 726.85   | 1451.70  | 726.86    | 2       | 1,075.4  |
|       | 13.2  | A0QX96     | MSMEG_3220                   | 99.0 | TEGIIPIAESAHAVAGALKL      | iTRAQ4plex@N-term; Ala->Thr@17; Lys->Glu@19     | cleaved L-G@C-term; missed K-L@19 | 0.06  | 2135.22 | 712.75   | 2135.16  | 712.73    | 3       | 358.1    |
|       | 13.2  | A0QX96     | MSMEG_3220                   | 99.0 | VQVQDQAGR                 | iTRAQ4plex@N-term                               |                                   | 0.00  | 1143.61 | 572.81   | 1143.61  | 572.81    | 2       | 118.2    |
| 213   | 13.0  | A0QU00     | MSMEG_2026                   | 99.0 | AAVEEGDDADVR              | iTRAQ4plex@N-term                               |                                   | 0.00  | 1389.65 | 695.83   | 1389.65  | 695.83    | 2       | 345.4    |
|       | 13.0  | A0QU00     | MSMEG_2026                   | 99.0 | TLAEVAAGHNLVVITAR         | No iTRAQ4plex@N-term                            |                                   | 0.00  | 1762.97 | 588.66   | 1762.97  | 588.66    | 3       | 105.2    |
| 214   | 12.9  | A0R069     | MSMEG_4281                   | 99.0 | ALGATGGEGQTHR             | iTRAQ4plex@N-term                               |                                   | 0.02  | 1397.73 | 466.92   | 1397.71  | 466.91    | 3       | 16.3     |
|       | 12.9  | A0R069     | MSMEG_4281                   | 99.0 | STVADLANVSGSR             | iTRAQ4plex@N-term                               |                                   | 0.02  | 1419.77 | 710.89   | 1419.74  | 710.88    | 2       | 833.4    |
| 215   | 12.7  | A0QWW3     | MSMEG_3085                   | 99.0 | AEGLTDGDVLLLENIR          | iTRAQ4plex@N-term                               |                                   | -0.02 | 1870.99 | 624.67   | 1871.01  | 624.68    | 3       |          |
|       | 12.7  | A0QWW3     | MSMEG_3085                   | 99.0 | TLDLLAEGVQGR              | iTRAQ4plex@N-term                               |                                   | -0.01 | 1529.81 | 765.91   | 1529.82  | 765.92    | 2       | 1,669.8  |
|       | 12.7  | A0QWW3     | MSMEG_3085                   | 91.0 | LAVIENLATK                | iTRAQ4plex@N-term; iTRAQ4plex(T)@9; Lys->Gln@10 |                                   | 0.02  | 1358.82 | 680.42   | 1358.80  | 680.41    | 2       | 493.6    |
| 216   | 12.6  | A0QU53     | MSMEG_2080                   | 98.0 | ASDTAVIR                  | iTRAQ4plex@N-term                               |                                   | -0.01 | 975.54  | 488.78   | 975.55   | 488.78    | 2       | 119.9    |
|       | 12.6  | A0QU53     | MSMEG_2080                   | 98.0 | EHPGVTVER                 | iTRAQ4plex@N-term                               |                                   | 0.00  | 1166.62 | 389.88   | 1166.62  | 389.88    | 3       | 197.8    |
| 217   | 12.5  | A0QP11     | MSMEG_0234                   | 99.0 | MDELVANLR                 | iTRAQ4plex@N-term                               |                                   | 0.00  | 1203.64 | 602.83   | 1203.64  | 602.83    | 2       | 661.1    |
|       | 12.5  | A0QP11     | MSMEG_0234                   | 98.0 | GYIVNSDR                  | iTRAQ4plex@N-term                               |                                   | 0.00  | 1066.55 | 534.28   | 1066.55  | 534.28    | 2       | 139.6    |
|       | 12.5  | A0QP11     | MSMEG_0234                   | 95.0 | ATDGAFR                   | iTRAQ4plex@N-term                               |                                   | 0.00  | 880.46  | 441.24   | 880.45   | 441.23    | 2       | 79.2     |
|       | 12.5  | A0QP11     | MSMEG_0234                   | 88.0 | SGIDLTHVDPR               | iTRAQ4plex@N-term                               |                                   | -0.01 | 1352.71 | 451.91   | 1352.72  | 451.91    | 3       | 487.1    |
| 218   | 12.4  | A0QR33     | MSMEG_0969                   | 99.0 | LAGLLTGALTEAGVAHQVQR      | iTRAQ4plex@N-term                               |                                   | -0.06 | 2148.16 | 717.06   | 2148.21  | 717.08    | 3       | 64.0     |
|       | 12.4  | A0QR33     | MSMEG_0969                   | 95.0 | AEALPAAAR                 | iTRAQ4plex@N-term; Pro->Ser@5                   | cleaved I-A@N-term                | 0.00  | 1002.56 | 502.28   | 1002.56  | 502.29    | 2       | 123.3    |
| 219   | 12.4  | A0QQX4     | MSMEG_0909                   | 99.0 | IADDFLAGLR                | iTRAQ4plex@N-term                               |                                   | -0.03 | 1233.65 | 617.83   | 1233.68  | 617.85    | 2       | 614.8    |
|       | 12.4  | A0QQX4     | MSMEG_0909                   | 99.0 | QLGFEDTHPAWIVR            | iTRAQ4plex@N-term                               |                                   | 0.01  | 1811.96 | 604.99   | 1811.94  | 604.99    | 3       | 634.6    |
| 220   | 12.3  | A0R0T8     | MSMEG_4504                   | 99.0 | LENSDIELLR                | iTRAQ4plex@N-term; Dimethyl(R)@10               |                                   | -0.01 | 1372.75 | 687.38   | 1372.77  | 687.39    | 2       | 955.2    |
|       | 12.3  | A0R0T8     | MSMEG_4504                   | 99.0 | SLLGQVMTSR                | iTRAQ4plex@N-term                               |                                   | 0.01  | 1234.70 | 618.36   | 1234.68  | 618.35    | 2       | 1,328.7  |
|       | 12.3  | A0R0T8     | MSMEG_4504                   | 98.0 | GEIQTVQR                  | iTRAQ4plex@N-term                               |                                   | 0.01  | 1073.60 | 537.81   | 1073.60  | 537.80    | 2       | 151.9    |
|       | 12.3  | A0R0T8     | MSMEG_4504                   | 96.0 | DYYGLLVGSK                | iTRAQ4plex@N-term; iTRAQ4plex(S)@9; Lys->Gln@10 |                                   | 0.01  | 1401.75 | 701.88   | 1401.74  | 701.88    | 2       | 93.3     |
| 221   | 12.2  | A0R220     | MSMEG_4956                   | 99.0 | AAVHPWPGLIEAYR            | iTRAQ4plex@N-term                               |                                   | 0.01  | 1851.00 | 618.01   | 1850.99  | 618.00    | 3       | 193.5    |

Supplement Table 1A

| Index | % Cov | Uniprot ID | Gene locus<br>(M. smegmatis) | Conf | Peptide Sequence               | Modifications                                                    | Cleavages                            | ΔMass | Prec MW | Prec m/z | Calc. MW | Calc. m/z | Theor z | Area 115 |
|-------|-------|------------|------------------------------|------|--------------------------------|------------------------------------------------------------------|--------------------------------------|-------|---------|----------|----------|-----------|---------|----------|
|       | 12.2  | A0R220     | MSMEG_4956                   | 99.0 | MLGTQAAGAAPLVGTGAPVKDPETIATAIF | iTRAQ4plex@N-term; Lys->Gln@19                                   |                                      | 0.04  | 2963.62 | 741.91   | 2963.59  | 741.90    | 4       | 88.9     |
| 222   | 12.0  | A0QSK7     | MSMEG_1513                   | 99.0 | KPYDALVEYLDVLDAAK              | iTRAQ4plex@N-term; Lys->Gln@1; iTRAQ4plex(Y)@3; Lys->Gln@17      |                                      | 0.07  | 2210.20 | 737.74   | 2210.14  | 737.72    | 3       | 116.1    |
|       | 12.0  | A0QSK7     | MSMEG_1513                   | 99.0 | LIDAVVAHGTDAGDIAAR             | iTRAQ4plex@N-term                                                |                                      | -0.01 | 1792.98 | 598.67   | 1792.99  | 598.67    | 3       | 794.6    |
| 223   | 12.0  | A0R2T0     | MSMEG_5222                   | 99.0 | VFNDDDVVHVDGR                  | iTRAQ4plex@N-term                                                |                                      | 0.00  | 1629.79 | 544.27   | 1629.79  | 544.27    | 3       | 307.4    |
|       | 12.0  | A0R2T0     | MSMEG_5222                   | 88.0 | ESIGQTERGLDALAR                | iTRAQ4plex@N-term; Deamidated(Q)@5; Deamidated(R)@8; Leu->Val@13 | cleaved L-E@N-term; missed R-G@8     | 0.05  | 1746.94 | 583.32   | 1746.89  | 583.30    | 3       | 1.573.5  |
| 224   | 11.7  | A0QVX6     | MSMEG_2731                   | 99.0 | LSSILEQADEAAQNER               | iTRAQ4plex@N-term                                                |                                      | -0.01 | 1916.95 | 639.99   | 1916.96  | 639.99    | 3       | 122.7    |
|       | 11.7  | A0QVX6     | MSMEG_2731                   | 99.0 | VIGAWQAGDTESAFHFGR             | iTRAQ4plex@N-term                                                |                                      | -0.01 | 2163.05 | 722.02   | 2163.06  | 722.03    | 3       | 93.5     |
| 225   | 11.7  | A0QSY5     | MSMEG_1647                   | 99.0 | HLDENAALER                     | iTRAQ4plex@N-term                                                |                                      | 0.00  | 1310.67 | 437.90   | 1310.67  | 437.90    | 3       | 182.3    |
|       | 11.7  | A0QSY5     | MSMEG_1647                   | 94.0 | VAALTAAGR                      | iTRAQ4plex@N-term                                                |                                      | 0.01  | 972.59  | 487.30   | 972.58   | 487.30    | 2       | 2.395.5  |
|       | 11.7  | A0QSY5     | MSMEG_1647                   | 79.0 | AFLLTNVVEAEESK                 | iTRAQ4plex@N-term; iTRAQ4plex(S)@13; Lys->Gln@14                 |                                      | -0.04 | 1836.93 | 613.32   | 1836.97  | 613.33    | 3       | 85.4     |
| 226   | 11.4  | A0R1H5     | MSMEG_4755                   | 99.0 | AATAEALLLDALGR                 | iTRAQ4plex@N-term                                                |                                      | -0.01 | 1527.86 | 764.94   | 1527.87  | 764.94    | 2       | 247.4    |
|       | 11.4  | A0R1H5     | MSMEG_4755                   | 99.0 | ADLEDLVR                       | iTRAQ4plex@N-term                                                |                                      | -0.01 | 1073.58 | 537.80   | 1073.58  | 537.80    | 2       | 191.6    |
| 227   | 11.3  | A0QYD5     | MSMEG_3620                   | 99.0 | TENALANPR                      | iTRAQ4plex@N-term                                                |                                      | 0.03  | 1128.63 | 565.32   | 1128.60  | 565.31    | 2       | 88.9     |
|       | 11.3  | A0QYD5     | MSMEG_3620                   | 99.0 | VQLGTLVTGNTYR                  | iTRAQ4plex@N-term                                                |                                      | -0.02 | 1564.85 | 783.43   | 1564.87  | 783.44    | 2       | 1.824.7  |
| 228   | 11.3  | A0QV09     | MSMEG_2407                   | 99.0 | EVNAGYNIVTEAYGPLGVGR           | iTRAQ4plex@N-term                                                |                                      | -0.02 | 2222.13 | 741.72   | 2222.15  | 741.72    | 3       | 18.5     |
| 229   | 11.0  | A0R218     | MSMEG_4954                   | 99.0 | TTILQDIANAIR                   | iTRAQ4plex@N-term                                                |                                      | 0.00  | 1572.90 | 787.46   | 1572.90  | 787.46    | 2       | 1.145.1  |
|       | 11.0  | A0R218     | MSMEG_4954                   | 93.0 | KNGLRRGDAVTGAVR                | iTRAQ4plex@N-term; User modH on Lys(K)@1                         | missed K-N@1; missed R-R@5; missed F | -0.01 | 1956.09 | 653.04   | 1956.10  | 653.04    | 3       |          |
| 230   | 10.9  | A0QSG8     | MSMEG_1474                   | 99.0 | NVPVMFEGGQMPIHMR               | iTRAQ4plex@N-term                                                |                                      | -0.02 | 1985.95 | 662.99   | 1985.98  | 663.00    | 3       | 147.3    |
| 231   | 10.1  | A0QSD4     | MSMEG_1439                   | 99.0 | GASVSDFAEITR                   | iTRAQ4plex@N-term                                                |                                      | 0.00  | 1395.71 | 698.86   | 1395.71  | 698.86    | 2       | 1.046.5  |
|       | 10.1  | A0QSD4     | MSMEG_1439                   | 99.0 | VAHIEYDPNR                     | iTRAQ4plex@N-term                                                |                                      | 0.01  | 1356.70 | 453.24   | 1356.69  | 453.24    | 3       | 399.0    |
| 232   | 10.0  | A0R0W4     | MSMEG_4530                   | 99.0 | IAVLNKGK                       | iTRAQ4plex@N-term; User modH on Lys(K)@6                         | missed K-G@6                         | -0.02 | 1256.74 | 419.92   | 1256.76  | 419.93    | 3       | 223.6    |
|       | 10.0  | A0R0W4     | MSMEG_4530                   | 95.0 | YPNQLSGGQR                     | iTRAQ4plex@N-term; Deamidated(Q)@4; Deamidated(Q)@9              |                                      | 0.03  | 1264.65 | 633.33   | 1264.62  | 633.32    | 2       | 10.169.2 |
| 233   | 9.6   | A0QVL2     | MSMEG_2613                   | 99.0 | DFSEPVALNWSQHGTVDVDFGSLSR      | iTRAQ4plex@N-term                                                |                                      | -0.01 | 2807.32 | 936.78   | 2807.33  | 936.78    | 3       | 215.4    |
|       | 9.6   | A0QVL2     | MSMEG_2613                   | 99.0 | GFGGFPVGGAFLR                  | iTRAQ4plex@N-term                                                |                                      | -0.02 | 1424.75 | 713.38   | 1424.77  | 713.39    | 2       | 118.3    |
| 234   | 9.5   | A0R618     | MSMEG_6393                   | 99.0 | DVLLTAAGAIPR                   | iTRAQ4plex@N-term                                                |                                      | 0.01  | 1339.81 | 670.91   | 1339.79  | 670.90    | 2       | 555.4    |
|       | 9.5   | A0R618     | MSMEG_6393                   | 99.0 | IAVPLDFPSEPHVGR                | iTRAQ4plex@N-term                                                |                                      | 0.01  | 1834.00 | 612.34   | 1833.99  | 612.34    | 3       | 179.3    |
|       | 9.5   | A0R618     | MSMEG_6393                   | 99.0 | LDIGPITDDIR                    | iTRAQ4plex@N-term                                                |                                      | 0.01  | 1370.76 | 686.39   | 1370.75  | 686.38    | 2       | 2.127.8  |
| 235   | 9.5   | A0QQW8     | MSMEG_0903                   | 99.0 | WDLTVNELAR                     | iTRAQ4plex@N-term                                                |                                      | 0.02  | 1359.75 | 680.88   | 1359.73  | 680.87    | 2       | 2.671.2  |
|       | 9.5   | A0QQW8     | MSMEG_0903                   | 80.0 | DLTVNELAR                      | iTRAQ4plex@N-term                                                | cleaved W-D@N-term                   | 0.01  | 1173.66 | 587.84   | 1173.65  | 587.83    | 2       | 1.561.6  |
| 236   | 9.4   | A0R417     | MSMEG_5672                   | 99.0 | SAITYIDGDAGILR                 | iTRAQ4plex@N-term                                                |                                      | 0.01  | 1607.88 | 804.95   | 1607.86  | 804.94    | 2       | 1.877.1  |
|       | 9.4   | A0R417     | MSMEG_5672                   | 99.0 | SQGGDVSDFVR                    | iTRAQ4plex@N-term                                                |                                      | 0.02  | 1309.66 | 655.83   | 1309.64  | 655.83    | 2       | 996.5    |
|       | 9.4   | A0R417     | MSMEG_5672                   | 96.0 | GYTDIAGR                       | iTRAQ4plex@N-term                                                |                                      | 0.01  | 995.53  | 498.77   | 995.52   | 498.77    | 2       | 1.006.3  |
|       | 9.4   | A0R417     | MSMEG_5672                   | 78.0 | QVELSTIR                       | iTRAQ4plex@N-term                                                |                                      | 0.01  | 1088.64 | 545.33   | 1088.63  | 545.32    | 2       | 2.988.7  |
| 237   | 9.1   | A0QZ54     | MSMEG_3902                   | 99.0 | ALVVGHAEER                     | iTRAQ4plex@N-term                                                |                                      | 0.04  | 1338.74 | 447.26   | 1338.70  | 447.24    | 3       | 172.9    |
|       | 9.1   | A0QZ54     | MSMEG_3902                   | 99.0 | EDMIDPAILRPGR                  | iTRAQ4plex@N-term                                                |                                      | 0.01  | 1625.87 | 542.97   | 1625.87  | 542.96    | 3       | 357.4    |
|       | 9.1   | A0QZ54     | MSMEG_3902                   | 99.0 | YLTEDLPVHADDLTEFNGDR           | iTRAQ4plex@N-term                                                |                                      | -0.06 | 2463.11 | 822.04   | 2463.17  | 822.06    | 3       | 633.8    |
| 238   | 8.9   | A0QUX1     | MSMEG_2367                   | 99.0 | DLVNAGAVELVAATVDHGSSEAAAR      | iTRAQ4plex@N-term                                                |                                      | -0.03 | 2594.32 | 865.78   | 2594.34  | 865.79    | 3       | 58.7     |
|       | 8.9   | A0QUX1     | MSMEG_2367                   | 78.0 | SVEVAVR                        | iTRAQ4plex@N-term                                                |                                      | 0.01  | 902.54  | 452.28   | 902.53   | 452.27    | 2       | 732.6    |
| 239   | 8.9   | A0R059     | MSMEG_4270                   | 99.0 | SAGLSLER                       | iTRAQ4plex@N-term                                                |                                      | 0.02  | 975.57  | 488.79   | 975.55   | 488.78    | 2       | 2.596.5  |
|       | 8.9   | A0R059     | MSMEG_4270                   | 99.0 | VSLSFLVDDLVIHR                 | iTRAQ4plex@N-term                                                |                                      | -0.01 | 1755.99 | 586.34   | 1756.00  | 586.34    | 3       |          |
| 240   | 8.9   | A0R343     | MSMEG_5336                   | 99.0 | LAAPSVTNPPPAALAAATTR           | iTRAQ4plex@N-term                                                |                                      | -0.03 | 1962.07 | 655.03   | 1962.10  | 655.04    | 3       | 366.7    |
|       | 8.9   | A0R343     | MSMEG_5336                   | 99.0 | LAAPSVTNPPPAALAAATTR           | iTRAQ4plex@N-term                                                |                                      | -0.04 | 1962.07 | 655.03   | 1962.10  | 655.04    | 3       | 424.4    |

Supplement Table 1A

| Index | % Cov | Uniprot ID | Gene locus<br>(M. smegmatis) | Conf | Peptide Sequence       | Modifications                                    | Cleavages                        | ΔMass | Prec MW | Prec m/z | Calc. MW | Calc. m/z | Theor z | Area    | 115 |
|-------|-------|------------|------------------------------|------|------------------------|--------------------------------------------------|----------------------------------|-------|---------|----------|----------|-----------|---------|---------|-----|
| 241   | 8.9   | A0R4Z5     | MSMEG_6008                   | 99.0 | LFATMLNTLER            | iTRAQ4plex@N-term                                | cleaved L-Q@C-term; missed K-M@6 | 0.02  | 1451.81 | 726.91   | 1451.79  | 726.90    | 2       | 157.3   |     |
|       | 8.9   | A0R4Z5     | MSMEG_6008                   | 99.0 | ETTLEKMAAL             | No iTRAQ4plex@N-term; User modH on Lys(K)@6      |                                  | -0.02 | 1348.66 | 675.34   | 1348.68  | 675.35    | 2       | 96.6    |     |
| 242   | 8.9   | A0QT01     | MSMEG_1662                   | 99.0 | ETFNDEESER             | iTRAQ4plex@N-term                                |                                  | 0.00  | 1398.60 | 700.31   | 1398.60  | 700.31    | 2       | 457.6   |     |
|       | 8.9   | A0QT01     | MSMEG_1662                   | 99.0 | GFLTPALWEAGLYCR        | iTRAQ4plex@N-term; Pyridylethyl(C)@14            |                                  | 0.01  | 1945.02 | 649.35   | 1945.00  | 649.34    | 3       |         |     |
|       | 8.9   | A0QT01     | MSMEG_1662                   | 98.0 | APFEPLTPGGFR           | iTRAQ4plex@N-term                                |                                  | 0.00  | 1431.76 | 716.89   | 1431.76  | 716.89    | 2       | 739.0   |     |
| 243   | 8.9   | A0QS66     | MSMEG_1368                   | 99.0 | GHDLGDP AIDALLAAGITTVK | iTRAQ4plex@N-term; iTRAQ4plex(T)@19; Lys->Gln@21 |                                  | 0.01  | 2335.27 | 584.83   | 2335.26  | 584.82    | 4       | 46.7    |     |
|       | 8.9   | A0QS66     | MSMEG_1368                   | 99.0 | MLDVNFFDEL R           | iTRAQ4plex@N-term                                |                                  | -0.01 | 1541.75 | 771.88   | 1541.77  | 771.89    | 2       | 225.3   |     |
|       | 8.9   | A0QS66     | MSMEG_1368                   | 99.0 | TFHQGGV TGGADIVGGLPR   | iTRAQ4plex@N-term                                |                                  | 0.00  | 1982.04 | 661.69   | 1982.05  | 661.69    | 3       | 531.2   |     |
|       | 8.9   | A0QS66     | MSMEG_1368                   | 98.0 | FATSDLNDLYR            | iTRAQ4plex@N-term                                |                                  | 0.01  | 1457.74 | 729.88   | 1457.73  | 729.87    | 2       | 1,238.5 |     |
|       | 8.9   | A0QS66     | MSMEG_1368                   | 97.0 | HEAEADA IER            | iTRAQ4plex@N-term                                |                                  | 0.01  | 1283.64 | 428.89   | 1283.62  | 428.88    | 3       | 76.9    |     |

Supplement Table 1B

| % Cov | Uniprot ID | Gene locus<br>(M. smegmatis) | Conf | Peptide Sequence               | Cleavages                                                                        | Δmass                                            | Prec MW | Prec m/z | Theor MW | Theor m/z | Theor z | Area 115 |        |
|-------|------------|------------------------------|------|--------------------------------|----------------------------------------------------------------------------------|--------------------------------------------------|---------|----------|----------|-----------|---------|----------|--------|
| 98.9  | A0R4D0     | MSMEG_5790                   | 99.0 | ALSSAGNGNVTVAPTGAGIHEVDVKVA    | iTRAQ4plex@N-term; Deamidated(N)@7; iTRAQ4plex(H)@20; User modH on Lys(K)@25     | missed K-V@25                                    | -0.04   | 3065.57  | 767.40   | 3065.61   | 767.41  | 4        | 132.1  |
| 79.1  | A0R6E3     | MSMEG_6518                   | 87.0 | KLQGSLEAAASR                   | iTRAQ4plex@N-term; User modH on Lys(K)@1                                         | missed K-L@1                                     | 0.04    | 1616.93  | 539.98   | 1616.88   | 539.97  | 3        |        |
| 74.6  | A0QSH8     | MSMEG_1484                   | 99.0 | LSEKLGIPQISTGDLFR              | iTRAQ4plex@N-term; iTRAQ4plex(S)@2; User modH on Lys(K)@4                        | missed K-L@4                                     | -0.03   | 2404.31  | 802.44   | 2404.34   | 802.46  | 3        | 997.1  |
| 74.2  | A0QVB9     | MSMEG_2520                   | 95.0 | NALVEADGDFDKAVELLRI            | iTRAQ4plex@N-term; User modH on Lys(K)@12; Glu->Gln@15; Dioxidation(R)@18        | cleaved I-K@C-term; missed K-A@12; missed R-I@18 | -0.02   | 2505.28  | 627.33   | 2505.31   | 627.33  | 4        | 101.9  |
| 74.2  | A0QVB9     | MSMEG_2520                   | 95.0 | NALVEADGDFDKAVELLRI            | iTRAQ4plex@N-term; Oxidation(D)@11; User modH on Lys(K)@12; Carbamyl(R)@18       | cleaved I-K@C-term; missed K-A@12; missed R-I@18 | 0.04    | 2533.34  | 845.45   | 2533.30   | 845.44  | 3        | 1315.0 |
| 74.2  | A0QVB9     | MSMEG_2520                   | 99.0 | NALVEADGDFDKAVELLRI            | iTRAQ4plex@N-term; User modH on Lys(K)@12                                        | missed K-A@12                                    | -0.06   | 2361.16  | 788.06   | 2361.22   | 788.08  | 3        | 133.1  |
| 71.0  | A0QS98     | MSMEG_2520                   | 94.0 | VVKSVEELMEAVDASIPDPVR          | iTRAQ4plex@N-term; User modH on Lys(K)@3; iTRAQ4plex(S)@4; Asp->Asn@18           | missed K-S@3                                     | -0.07   | 2899.45  | 725.87   | 2899.52   | 725.89  | 4        | 5.4    |
| 71.0  | A0QS98     | MSMEG_1401                   | 94.0 | VVKSVEELMEAVDASIPDPVR          | iTRAQ4plex@N-term; User modH on Lys(K)@3; iTRAQ4plex(S)@4; Asp->Asn@18           | missed K-S@3                                     | -0.07   | 2899.45  | 725.87   | 2899.52   | 725.89  | 4        | 5.4    |
| 68.7  | A0R0B3     | MSMEG_4326                   | 99.0 | YGVKIPDEDLAGLR                 | iTRAQ4plex@N-term; iTRAQ4plex(Y)@1; User modH on Lys(K)@4                        | missed K-L@4                                     | 0.01    | 2076.15  | 693.06   | 2076.13   | 693.05  | 3        | 789.5  |
| 68.7  | A0R0B3     | MSMEG_4326                   | 99.0 | TVGDVVAYIQKLEENPEAAAALR        | No iTRAQ4plex@N-term; iTRAQ4plex(Y)@8; User modH on Lys(K)@11                    | missed K-L@11                                    | -0.02   | 2972.53  | 744.14   | 2972.55   | 744.14  | 4        | 89.6   |
| 68.7  | A0R0B3     | MSMEG_4326                   | 99.0 | TVGDVVAYIQKLEENPEAAAALR        | iTRAQ4plex@N-term; iTRAQ4plex(Y)@8; Deamidated(Q)@10; User modH on Lys(K)@11; De | missed K-L@11                                    | 0.02    | 3099.64  | 775.92   | 3099.62   | 775.91  | 4        | 75.9   |
| 62.9  | A0QWW2     | MSMEG_3084                   | 99.0 | VPIPTGSVTLTDLAELAKSASVEDINAAMK | iTRAQ4plex@N-term; Glu->Gln@14; User modH on Lys(K)@17; iTRAQ4plex(S)@18; Lys->G | missed K-S@17                                    | -0.08   | 3457.73  | 865.44   | 3457.81   | 865.46  | 4        | 124.7  |
| 62.9  | A0QWW2     | MSMEG_3084                   | 92.0 | VPIPTGSVTLTDLAELAKSASVEDINAAMK | iTRAQ4plex@N-term; User modH on Lys(K)@17; Ser->Met@20; Deamidated(N)@25; User m | missed K-S@17                                    | 0.10    | 3602.93  | 901.74   | 3602.83   | 901.71  | 4        | 339.3  |
| 60.9  | A0QZA1     | MSMEG_3950                   | 99.0 | TLIDASKSAQMVVGNR               | iTRAQ4plex@N-term; User modH on Lys(K)@7; iTRAQ4plex(S)@8                        | missed K-S@7                                     | 0.02    | 2319.29  | 774.10   | 2319.27   | 774.10  | 3        | 749.1  |
| 59.9  | A0R4C9     | MSMEG_5789                   | 99.0 | DFVDAQQFSKLLSER                | iTRAQ4plex@N-term; iTRAQ4plex(S)@9; User modH on Lys(K)@10                       | missed K-L@10                                    | -0.04   | 2313.17  | 772.06   | 2313.21   | 772.08  | 3        | 771.4  |
| 59.9  | A0R4C9     | MSMEG_5789                   | 98.0 | DFVDAQQFSKLLSER                | iTRAQ4plex@N-term; iTRAQ4plex(S)@9; User modH on Lys(K)@10                       | missed K-L@10                                    | -0.02   | 2313.19  | 579.30   | 2313.21   | 579.31  | 4        | 90.2   |
| 59.9  | A0R4C9     | MSMEG_5789                   | 92.0 | DFVDAQQFSKLLSER                | iTRAQ4plex@N-term; iTRAQ4plex(S)@9; User modH on Lys(K)@10; Dimethyl(R)@15       | missed K-L@10                                    | -0.03   | 2341.21  | 586.31   | 2341.24   | 586.32  | 4        | 209.5  |
| 56.9  | A0QQU5     | MSMEG_0880                   | 88.0 | NVAAGANPLGLKR                  | iTRAQ4plex@N-term; User modH on Lys(K)@12; Oxidation(R)@13                       | missed K-R@12                                    | 0.00    | 1682.95  | 842.48   | 1682.94   | 842.48  | 2        | 1157.9 |
| 50.7  | A0QWX9     | MSMEG_3102                   | 91.0 | LEKIGSDEALALR                  | iTRAQ4plex@N-term; User modH on Lys(K)@3; iTRAQ4plex(S)@6                        | missed K-L@3                                     | -0.04   | 1945.06  | 649.36   | 1945.10   | 649.37  | 3        | 258.8  |
| 46.9  | A0QNF6     | MSMEG_0024                   | 99.0 | HTIFGEVVDDEESQKVVDIAIAPTPTDR   | iTRAQ4plex@N-term; Glu->Gln@11; iTRAQ4plex(S)@12; User modH on Lys(K)@14         | missed K-V@14                                    | -0.07   | 3372.66  | 844.17   | 3372.73   | 844.19  | 4        | 50.0   |
| 46.9  | A0QNF6     | MSMEG_0024                   | 95.0 | HTIFGEVVDDEESQKVVDIAIAPTPTDR   | iTRAQ4plex@N-term; iTRAQ4plex(S)@12; User modH on Lys(K)@14                      | missed K-V@14                                    | -0.05   | 3373.66  | 844.42   | 3373.71   | 844.44  | 4        | 87.8   |
| 46.9  | A0QNF6     | MSMEG_0024                   | 28.0 | HTIFGEVVDDEESQKVVDIAIAPTPTDR   | iTRAQ4plex@N-term; iTRAQ4plex(S)@12; User modH on Lys(K)@14                      | missed K-V@14                                    | -0.08   | 3373.63  | 675.73   | 3373.71   | 675.75  | 5        | 70.4   |
| 44.9  | A0R5R5     | MSMEG_6284                   | 99.0 | EQATWAQKAIQEGTLDLAEVR          | iTRAQ4plex@N-term; iTRAQ4plex(T)@4; User modH on Lys(K)@8; Dimethyl(R)@22        | missed K-A@8                                     | -0.03   | 2986.56  | 747.65   | 2986.58   | 747.65  | 4        | 68.5   |
| 44.9  | A0R5R5     | MSMEG_6284                   | 92.0 | EQATWAQKAIQEGTLDLAEVR          | No iTRAQ4plex@N-term; Deamidated(Q)@2; User modH on Lys(K)@8                     | missed K-A@8                                     | -0.01   | 2671.32  | 1336.67  | 2671.33   | 1336.67 | 2        | 1022.9 |
| 38.0  | A0R0B4     | MSMEG_4327                   | 91.0 | VLEDEFYTKWDLPVPR               | iTRAQ4plex@N-term; iTRAQ4plex(T)@8; User modH on Lys(K)@9                        | missed K-W@9                                     | -0.07   | 2376.21  | 793.08   | 2376.28   | 793.10  | 3        | 49.9   |
| 36.4  | A0QUV7     | MSMEG_2352                   | 99.0 | GVGSAENFKIVEELADSLGGAVGASR     | iTRAQ4plex@N-term; iTRAQ4plex(S)@4; User modH on Lys(K)@9                        | missed K-L@9                                     | 0.01    | 3063.60  | 766.91   | 3063.60   | 766.91  | 4        | 80.4   |
| 36.4  | A0QUV7     | MSMEG_2352                   | 96.0 | GVGSAENFKIVEELADSLGGAVGASR     | iTRAQ4plex@N-term; iTRAQ4plex(S)@4; User modH on Lys(K)@9; Glu->Gln@13           | missed K-L@9                                     | -0.11   | 3062.50  | 766.63   | 3062.61   | 766.66  | 4        | 8.7    |
| 30.9  | A0QXX7     | MSMEG_3461                   | 99.0 | FAPINSWPDNVSCLKAR              | iTRAQ4plex@N-term; Deamidated(N)@10; User modH on Lys(K)@15                      | missed K-A@15                                    | 0.04    | 2317.21  | 773.41   | 2317.17   | 773.40  | 3        | 19.6   |
| 27.8  | A0R2V7     | MSMEG_5249                   | 99.0 | QPAFQQYAAQVADNAQALADGFVKRDA    | iTRAQ4plex@N-term; Deamidated(Q)@9; User modH on Lys(K)@24; Arg->Orn(R)@25       | cleaved A-G@C-term; missed K-R@24; missed R-D@25 | 0.06    | 3295.67  | 824.93   | 3295.61   | 824.91  | 4        | 923.9  |
| 24.7  | A0R0B5     | MSMEG_4328                   | 99.0 | LSYLQKMATVLR                   | iTRAQ4plex@N-term; User modH on Lys(K)@6; Deamidated(R)@13                       | missed K-M@6; missed R-R@13                      | -0.01   | 2023.12  | 675.38   | 2023.12   | 675.38  | 3        | 95.7   |
| 22.1  | A0QWV9     | MSMEG_3081                   | 77.0 | LGVSAKAR                       | iTRAQ4plex@N-term; User modH on Lys(K)@6                                         | missed K-A@6                                     | -0.06   | 1187.64  | 396.89   | 1187.70   | 396.91  | 3        | 41.3   |
| 22.1  | A0QWV9     | MSMEG_3081                   | 99.0 | LGVSAKAR                       | iTRAQ4plex@N-term; User modH on Lys(K)@6                                         | missed K-A@6                                     | 0.05    | 1187.75  | 594.88   | 1187.70   | 594.86  | 2        | 622.9  |
| 21.9  | A0R3D2     | MSMEG_5431                   | 82.0 | TRTGKGASR                      | iTRAQ4plex@N-term; User modH on Lys(K)@5                                         | missed R-T@2; missed K-G@5                       | 0.01    | 1319.74  | 660.88   | 1319.73   | 660.87  | 2        | 817.1  |
| 21.4  | A0R0W1     | MSMEG_4527                   | 82.0 | RAQVLVPELEKR                   | iTRAQ4plex@N-term; User modH on Lys(K)@11                                        | missed R-A@1; missed K-R@11                      | -0.02   | 1824.04  | 609.02   | 1824.06   | 609.03  | 3        | 20.7   |
| 21.4  | A0R0W1     | MSMEG_4527                   | 77.0 | RAQVLVPELEKR                   | iTRAQ4plex@N-term; User modH on Lys(K)@11                                        | missed R-A@1; missed K-R@11                      | 0.01    | 1824.07  | 609.03   | 1824.06   | 609.03  | 3        | 10.9   |
| 20.0  | A0QUY3     | MSMEG_2379                   | 11.0 | VDKAVSEHLATR                   | iTRAQ4plex@N-term; User modH on Lys(K)@3                                         | missed K-A@3                                     | -0.02   | 1711.90  | 428.98   | 1711.92   | 428.99  | 4        | 30.3   |
| 20.0  | A0QX81     | MSMEG_3205                   | 99.0 | GGVDVAVPKVRPIVDAVAQR           | iTRAQ4plex@N-term; User modH on Lys(K)@11; Deamidated(Q)@21                      | missed K-V@11                                    | 0.01    | 2647.47  | 662.88   | 2647.47   | 662.87  | 4        | 126.8  |



Supplement Table 1B

| % Cov | Uniprot ID | Gene locus<br>(M. smegmatis) | Conf | Peptide Sequence              |                                                             | Cleavages                                 | Δmass | Prec MW | Prec m/z | Theor MW | Theor m/z | Theor z | Area 115 |
|-------|------------|------------------------------|------|-------------------------------|-------------------------------------------------------------|-------------------------------------------|-------|---------|----------|----------|-----------|---------|----------|
| 18.8  | A0QWG8     | MSMEG_2937                   | 99.0 | ATTFYDDPDVLAKVSR              | iTRAQ4plex@N-term; User modH on Lys(K)@13; iTRAQ4plex(S)@15 | missed K-V@13                             | 0.02  | 2328.23 | 777.08   | 2328.21  | 777.08    | 3       | 343.5    |
| 18.5  | A0R2G5     | MSMEG_5104                   | 99.0 | NSLSGAVEVVKRDGTGITLEALHAN     | iTRAQ4plex@N-term; User modH on Lys(K)@11; Deamidated(N)@20 | missed K-R@11; missed R-D@12              | -0.09 | 3052.49 | 764.13   | 3052.58  | 764.15    | 4       | 83.7     |
| 17.8  | A0QQ65     | MSMEG_0643                   | 76.0 | YADGTPIKASDFTYAIQR            | iTRAQ4plex@N-term; User modH on Lys(K)@8; iTRAQ4plex(Y)@14  | missed K-A@8                              | 0.04  | 2547.35 | 850.12   | 2547.31  | 850.11    | 3       | 56.4     |
| 17.8  | A0QQ65     | MSMEG_0643                   | 82.0 | YADGTPIKASDFTYAIQR            | iTRAQ4plex@N-term; User modH on Lys(K)@8                    | missed K-A@8                              | -0.01 | 2403.20 | 802.07   | 2403.21  | 802.08    | 3       | 400.4    |
| 16.7  | A0QSL6     | MSMEG_1522                   | 99.0 | GSRKSTPFAAQLAENAAR            | No iTRAQ4plex@N-term; User modH on Lys(K)@4                 | missed R-K@3; missed K-S@4                | 0.06  | 2188.18 | 730.40   | 2188.12  | 730.38    | 3       | 295.9    |
| 16.1  | A0QUY9     | MSMEG_2387                   | 76.0 | VVADVLRGRKVADGVR              | iTRAQ4plex@N-term; User modH on Lys(K)@10; Oxidation(D)@13  | missed R-G@7; missed R-K@9; missed K-V@10 | 0.12  | 2112.33 | 705.12   | 2112.21  | 705.08    | 3       | 67.7     |
| 16.1  | A0QUY9     | MSMEG_2387                   | 76.0 | VVADVLRGRKVADGVR              | iTRAQ4plex@N-term; Deamidated(R)@9; User modH on Lys(K)@10  | missed R-G@7; missed R-K@9; missed K-V@10 | 0.02  | 2097.22 | 525.31   | 2097.20  | 525.31    | 4       | 2108.0   |
| 14.0  | A0R5M8     | MSMEG_6247                   | 98.0 | ELSADFDLDAFEHVAKWNSDEERIEMWLR | iTRAQ4plex@N-term; User modH on Lys(K)@16                   | missed K-W@16; missed R-I@23              | -0.24 | 3937.61 | 788.53   | 3937.86  | 788.58    | 5       |          |
| 11.0  | A0R218     | MSMEG_4954                   | 93.0 | KNGLRRGDAVTGAVR               | iTRAQ4plex@N-term; User modH on Lys(K)@1                    | missed K-N@1; missed R-R@5; missed R-G@6  | -0.01 | 1956.09 | 653.04   | 1956.10  | 653.04    | 3       |          |
| 10.0  | A0R0W4     | MSMEG_4530                   | 99.0 | IAVLNKGR                      | iTRAQ4plex@N-term; User modH on Lys(K)@6                    | missed K-G@6                              | -0.02 | 1256.74 | 419.92   | 1256.76  | 419.93    | 3       | 223.6    |
| 8.9   | A0R4Z5     | MSMEG_6008                   | 99.0 | ETTLKMAAL                     | No iTRAQ4plex@N-term; User modH on Lys(K)@6                 | cleaved L-Q@C-term; missed K-M@6          | -0.02 | 1348.66 | 675.34   | 1348.68  | 675.35    | 2       | 96.6     |

### Supplement Table 2A

| Spot number | Uniprot ID | Gene locus<br>( <i>M. smegmatis</i> ) | pI<br>(seq.) | MW [kDa] | Sequence<br>Cov.<br>[%] | MS/MS<br>Mascot<br>Score |
|-------------|------------|---------------------------------------|--------------|----------|-------------------------|--------------------------|
| 1           | B6DAC1     | (Rv2111c)                             | 3.8          | 6.9      | 42.2                    | 119.3                    |
| 2           | B6DAC1     | (Rv2111c)                             | 3.8          | 6.9      | 42.2                    | 105.6                    |
| 4           | A0QYF5     | MSMEG_3640                            | 4.6          | 78.2     | 10.5                    | 288.6                    |
| 4           | B6DAC1     | (Rv2111c)                             | 3.8          | 6.9      | 75.0                    | 256.9                    |
| 5           | A0QVB9     | MSMEG_2520                            | 5.0          | 29.4     | 18.9                    | 213.1                    |
| 5           | A0QWT3     | MSMEG_3055                            | 4.8          | 42.6     | 29.1                    | 173.3                    |
| 5           | A0QWX9     | MSMEG_3102                            | 4.6          | 39.9     | 14.6                    | 76.2                     |
| 5           | B6DAC1     | (Rv2111c)                             | 3.8          | 6.9      | 81.3                    | 248.6                    |
| 6           | A0QWT3     | MSMEG_3055                            | 4.8          | 42.6     | 37.8                    | 491.3                    |
| 6           | A0R0B5     | MSMEG_4328                            | 4.9          | 43.8     | 20.7                    | 250.7                    |
| 6           | A0R4Z5     | MSMEG_6008                            | 4.8          | 42.6     | 4.9                     | 77.6                     |
| 6           | A0R7G6     | MSMEG_6904                            | 4.7          | 39.3     | 10.5                    | 224.2                    |
| 6           | B6DAC1     | (Rv2111c)                             | 3.8          | 6.9      | 84.4                    | 388.9                    |
| 7           | A0QUX8     | MSMEG_2374                            | 4.7          | 36.4     | 6.5                     | 107.0                    |
| 7           | A0R0B5     | MSMEG_4328                            | 4.9          | 43.8     | 8.4                     | 104.9                    |
| 7           | A0QQU5     | MSMEG_0880                            | 4.7          | 56.5     | 12.2                    | 99.4                     |
| 7           | B6DAC1     | (Rv2111c)                             | 3.8          | 6.9      | 84.4                    | 409.2                    |
| 8           | A0QVB9     | MSMEG_2520                            | 5.0          | 29.4     | 92.0                    | 1665.4                   |
| 8           | B6DAC1     | (Rv2111c)                             | 3.8          | 6.9      | 84.4                    | 345.7                    |
| 9           | A0R087     | MSMEG_4298                            | 5.3          | 30.0     | 45.3                    | 430.6                    |
| 9           | B6DAC1     | (Rv2111c)                             | 3.8          | 6.9      | 76.6                    | 215.0                    |
| 10          | A0QZA1     | MSMEG_3950                            | 5.4          | 29.8     | 35.6                    | 395.6                    |
| 10          | B6DAC1     | (Rv2111c)                             | 3.8          | 6.9      | 76.6                    | 350.4                    |
| 11          | A0R220     | MSMEG_4956                            | 5.6          | 37.4     | 30.0                    | 218.9                    |
| 11          | B6DAC1     | (Rv2111c)                             | 3.8          | 6.9      | 75.0                    | 234.6                    |
| 12          | A0QVQ8     | MSMEG_2659                            | 5.5          | 38.9     | 41.8                    | 537.7                    |
| 12          | B6DAC1     | (Rv2111c)                             | 3.8          | 6.9      | 73.4                    | 142.6                    |
| 13          | A0QX96     | MSMEG_3220                            | 5.2          | 45.0     | 41.9                    | 842.6                    |
| 13          | B6DAC1     | (Rv2111c)                             | 3.8          | 6.9      | 75.0                    | 118.7                    |
| 14          | A0R5R7     | MSMEG_6286                            | 5.2          | 46.4     | 27.1                    | 429.5                    |
| 14          | B6DAC1     | (Rv2111c)                             | 3.8          | 6.9      | 75.0                    | 220.6                    |
| 15          | A0R342     | MSMEG_5335                            | 4.7          | 44.8     | 48.9                    | 666.3                    |
| 15          | A0R4C9     | MSMEG_5789                            | 4.8          | 31.0     | 13.7                    | 61.7                     |
| 15          | B6DAC1     | (Rv2111c)                             | 3.8          | 6.9      | 82.8                    | 304.0                    |
| 16          | A0R1V9     | MSMEG_4891                            | 4.3          | 21.6     | 78.5                    | 603.6                    |
| 16          | B6DAC1     | (Rv2111c)                             | 3.8          | 6.9      | 84.4                    | 362.5                    |
| 17          | A0QUZ0     | MSMEG_2388                            | 5.1          | 21.9     | 49.2                    | 438.3                    |
| 17          | A0R066     | MSMEG_4276                            | 4.8          | 39.8     | 21.5                    | 316.8                    |
| 17          | B6DAC1     | (Rv2111c)                             | 3.8          | 6.9      | 82.8                    | 317.3                    |
| 18          | A0R7I9     | MSMEG_6933                            | 4.6          | 33.5     | 76.8                    | 1272.1                   |
| 18          | B6DAC1     | (Rv2111c)                             | 3.8          | 6.9      | 84.4                    | 408.8                    |
| 19          | A0R1Y7     | MSMEG_4920                            | 5.2          | 42.6     | 52.8                    | 513.5                    |
| 19          | B6DAC1     | (Rv2111c)                             | 3.8          | 6.9      | 75.0                    | 182.2                    |
| 20          | A0R0B3     | MSMEG_4326                            | 3.7          | 10.7     | 56.6                    | 157.8                    |
| 20          | B6DAC1     | (Rv2111c)                             | 3.8          | 6.9      | 76.6                    | 429.7                    |
| 21          | B6DAC1     | (Rv2111c)                             | 3.8          | 6.9      | 75.0                    | 108.8                    |
| 22          | A0QUX8     | MSMEG_2374                            | 4.7          | 36.4     | 8.6                     | 122.7                    |
| 22          | A0QVZ3     | MSMEG_2750                            | 5.1          | 25.4     | 54.8                    | 425.9                    |
| 22          | B6DAC1     | (Rv2111c)                             | 3.8          | 6.9      | 75.0                    | 213.3                    |
| 23          | A0QU00     | MSMEG_2026                            | 5.0          | 23.5     | 16.1                    | 113.7                    |
| 23          | B6DAC1     | (Rv2111c)                             | 3.8          | 6.9      | 76.6                    | 98.8                     |
| 24          | A0R652     | MSMEG_6427                            | 5.4          | 22.9     | 53.6                    | 280.6                    |
| 24          | B6DAC1     | (Rv2111c)                             | 3.8          | 6.9      | 34.4                    | 225.2                    |
| 25          | B6DAC1     | (Rv2111c)                             | 3.8          | 6.9      | 89.1                    | 790.0                    |
| 26          | B6DAC1     | (Rv2111c)                             | 3.8          | 6.9      | 84.4                    | 538.5                    |
| 27          | A0R4D0     | MSMEG_5790                            | 4.3          | 9.0      | 70.0                    | 184.1                    |
| 27          | B6DAC1     | (Rv2111c)                             | 3.8          | 6.9      | 84.4                    | 298.1                    |
| 28          | A0R2W6     | MSMEG_5258                            | 4.4          | 13.2     | 65.3                    | 215.0                    |
| 28          | A0R4D0     | MSMEG_5790                            | 4.3          | 9.0      | 58.9                    | 168.3                    |
| 28          | B6DAC1     | (Rv2111c)                             | 3.8          | 6.9      | 84.4                    | 415.9                    |
| 29          | A0R4D0     | MSMEG_5790                            | 4.3          | 9.0      | 40.0                    | 73.7                     |
| 29          | B6DAC1     | (Rv2111c)                             | 3.8          | 6.9      | 84.4                    | 385.7                    |
| 30          | B6DAC1     | (Rv2111c)                             | 3.8          | 6.9      | 84.4                    | 651.7                    |
| 31          | B6DAC1     | (Rv2111c)                             | 3.8          | 6.9      | 89.1                    | 665.6                    |
| 32          | B6DAC1     | (Rv2111c)                             | 3.8          | 6.9      | 76.6                    | 410.0                    |

### Supplement Table 2A

| Spot number | Uniprot ID | Gene locus (M. smegmatis) | pI (seq.) | MW [kDa] | Sequence Cov. [%] | MS/MS Mascot Score |
|-------------|------------|---------------------------|-----------|----------|-------------------|--------------------|
| 33          | B6DAC1     | (Rv2111c)                 | 3.8       | 6.9      | 95.3              | 627.4              |
| 34          | B6DAC1     | (Rv2111c)                 | 3.8       | 6.9      | 84.4              | 535.4              |
| 35          | B6DAC1     | (Rv2111c)                 | 3.8       | 6.9      | 76.6              | 435.3              |
| 36          | B6DAC1     | (Rv2111c)                 | 3.8       | 6.9      | 100.0             | 653.6              |
| 37          | B6DAC1     | (Rv2111c)                 | 3.8       | 6.9      | 76.6              | 397.6              |
| 38          | B6DAC1     | (Rv2111c)                 | 3.8       | 6.9      | 82.8              | 422.5              |
| 39          | B6DAC1     | (Rv2111c)                 | 3.8       | 6.9      | 84.4              | 620.6              |
| 40          | B6DAC1     | (Rv2111c)                 | 3.8       | 6.9      | 76.6              | 430.1              |

## Supplement Table 2B

| Spot Number         | Uniprot ID | Gene locus (M. smegmatis) | Peptid sequence                                 | Sequence range | z | Mascot score |
|---------------------|------------|---------------------------|-------------------------------------------------|----------------|---|--------------|
| 5                   | A0QWT3     | MSMEG_3055                | GFDGASC <sup>PAm</sup> GVNVAIGAQSPDIAQGVDTAHETR | 85 - 115       | 3 | 78.8         |
|                     |            |                           | LDTVVLSTQHADGIDLEGTLTPDIR                       | 192 - 216      | 3 | 15.6         |
|                     |            |                           | VVNTVLADLGHETLDTSDYR                            | 219 - 238      | 3 | 12.2         |
|                     |            |                           | DLDLLRPIYAPTAAYGHFGR                            | 360 - 379      | 3 | 58.4         |
|                     |            |                           | TDIELPWEQTNKVDDLK <sup>PupylGGE</sup> SAI       | 380 - 399      | 3 | 14.9         |
| 8                   | A0QVB9     | MSMEG_2520                | ANYTAADVKR                                      | 2-11           | 2 | 63.1         |
|                     |            |                           | LRELTGAGMLDSK                                   | 12-24          | 2 | 41.7         |
|                     |            |                           | LRELTGAGM <sup>Ox</sup> LDSK                    | 12-24          | 3 | 19.0         |
|                     |            |                           | NALVEADGDFDK <sup>PupylGGE</sup> AVELLR         | 25 - 42        | 3 | 60.0         |
|                     |            |                           | ATAEGLVAAK                                      | 56 - 65        | 1 | 10.6         |
|                     |            |                           | ATAEGLVAAK                                      | 56 - 65        | 2 | 67.2         |
|                     |            |                           | DGALIELNSETDFVAK                                | 66 - 81        | 2 | 124.9        |
|                     |            |                           | NAEFQALADQIVAAVAAK                              | 82 - 100       | 3 | 109.7        |
|                     |            |                           | ANDIETLK                                        | 101 - 108      | 2 | 54.1         |
|                     |            |                           | AAK <sup>PupylGGE</sup> TGDTTVEQAIADLSAK        | 109 - 127      | 3 | 59.0         |
|                     |            |                           | TGDTTVEQAIADLSAK                                | 112 - 127      | 2 | 118.9        |
|                     |            |                           | TGDTTVEQAIADLSAK                                | 112 - 127      | 3 | 57.7         |
|                     |            |                           | IGEK <sup>PupylGGE</sup> LELR                   | 128 - 135      | 2 | 53.6         |
|                     |            |                           | RAAYFDGTVEAYLHK                                 | 136 - 150      | 3 | 23.8         |
|                     |            |                           | AAYFDGTVEAYLHKR                                 | 137 - 151      | 3 | 34.9         |
|                     |            |                           | AADLPPAVGVLVEYQAGDADK                           | 152 - 172      | 3 | 85.2         |
|                     |            |                           | GKEAAHAVALQIAALK                                | 173 - 188      | 3 | 42.1         |
|                     |            |                           | EAAHAVALQIAALK                                  | 175 - 188      | 2 | 81.1         |
|                     |            |                           | EAAHAVALQIAALK                                  | 175 - 188      | 3 | 51.5         |
|                     |            |                           | YLTREDVPEDIVANER                                | 191 - 206      | 3 | 50.6         |
|                     |            |                           | YLTREDVPEDIVANERR                               | 191 - 207      | 3 | 33.8         |
|                     |            |                           | EDVPEDIVANER                                    | 195 - 206      | 2 | 74.2         |
|                     |            |                           | EDVPEDIVANERR                                   | 195 - 207      | 2 | 19.9         |
|                     |            |                           | EDVPEDIVANERR                                   | 195 - 207      | 3 | 35.6         |
|                     |            |                           | RIAETAR                                         | 207 - 214      | 2 | 31.4         |
|                     |            |                           | IAEETAR                                         | 208 - 214      | 1 | 16.2         |
|                     |            |                           | IAEETAR                                         | 208 - 214      | 2 | 61.1         |
|                     |            |                           | NEGKPEQALPK                                     | 215 - 225      | 2 | 50.2         |
|                     |            |                           | IVEGR                                           | 226 - 230      | 1 | 10.3         |
|                     |            |                           | VTGFYKDVVLLDQPSVSDNKK                           | 231 - 251      | 3 | 42.4         |
|                     |            |                           | DVVLLDQPSVSDNK                                  | 237 - 250      | 2 | 92.5         |
|                     |            |                           | DVVLLDQPSVSDNKK                                 | 237 - 251      | 2 | 81.4         |
|                     |            |                           | DVVLLDQPSVSDNKK                                 | 237 - 251      | 3 | 38.3         |
|                     |            |                           | ALLDEAGVTVTR                                    | 255 - 266      | 2 | 101.8        |
| FEVGQA              | 270 - 275  | 1                         | 19.3                                            |                |   |              |
| 11                  | A0R220     | MSMEG_4956                | GQQAVLC <sup>PAm</sup> ASTGNTSASAAAYAAR         | 84 - 106       | 3 | 62.4         |
|                     |            |                           | K <sup>PupylGGE</sup> LTADFPTIALVNSVNPYR        | 151 - 169      | 3 | 11.8         |
|                     |            |                           | MLGTQAAGAAPLVGAPVKDPETIATAIR                    | 223 - 251      | 3 | 21.5         |
|                     |            |                           | M <sup>Ox</sup> LGTQAAGAAPLVGAPVKDPETIATAIR     | 223 - 251      | 3 | 19.0         |
|                     |            |                           | FLAATDEEILAAYHLVAR                              | 272 - 289      | 3 | 55.8         |
| TEGVFVEPASAASIAGLLK | 290 - 308  | 2                         | 73.8                                            |                |   |              |
| 14                  | A0R5R7     | MSMEG_6286                | SFQSLGRDDLLAQHELQQR                             | 2-20           | 3 | 32.0         |
|                     |            |                           | GKPSPEQLDLSNGLLSLPGDGADAYR                      | 37 - 62        | 3 | 29.0         |
|                     |            |                           | NYGGVQGLPELR                                    | 71 - 82        | 2 | 72.1         |
|                     |            |                           | LVQMPTAAK                                       | 205 - 213      | 2 | 23.6         |
|                     |            |                           | FFGDADGVR                                       | 302 - 310      | 2 | 51.3         |
|                     |            |                           | FALVAEILEDL                                     | 324 - 334      | 2 | 87.6         |
|                     |            |                           | LGESK <sup>PupylGGE</sup> IASWTDPK              | 335 - 347      | 3 | 17.0         |
|                     |            |                           | DAGIAVTEAGSAFPYR                                | 370 - 385      | 2 | 85.6         |
|                     |            |                           | DAGIAVTEAGSAFPYRK                               | 370 - 386      | 2 | 43.0         |
|                     |            |                           | DAGIAVTEAGSAFPYRK                               | 370 - 386      | 3 | 33.7         |
| 15                  | A0R342     | MSMEG_5335                | DQAVPGHNR                                       | 16 - 24        | 2 | 36.8         |
|                     |            |                           | WHPDIPAAATVK <sup>PupylGGQ</sup> PGSEFR         | 25 - 42        | 3 | 21.6         |
|                     |            |                           | WHPDIPAAATVK <sup>PupylGGE</sup> PGSEFR         | 25 - 42        | 3 | 39.5         |
|                     |            |                           | EWTDGQIGNNDSANDVR                               | 47 - 63        | 2 | 73.0         |

## Supplement Table 2B

| Spot Number | Uniprot ID | Gene locus (M. smegmatis) | Peptid sequence                                                          | Sequence range | z | Mascot score |
|-------------|------------|---------------------------|--------------------------------------------------------------------------|----------------|---|--------------|
|             |            |                           | EWTGQIGNNDSSANDVR                                                        | 47 - 63        | 3 | 68.5         |
|             |            |                           | DVDLAPC <sup>PAm</sup> HMLSGPIK                                          | 64 - 78        | 2 | 67.4         |
|             |            |                           | DVDLAPC <sup>PAm</sup> HM <sup>Ox</sup> LSGPIK                           | 64 - 78        | 3 | 18.9         |
|             |            |                           | VNGGGFLTDYYPDAYK                                                         | 119 - 134      | 2 | 95.0         |
|             |            |                           | HVPGVR                                                                   | 148 - 153      | 2 | 20.0         |
|             |            |                           | YTGITHPGLFGTAPSPDLLAK                                                    | 154 - 174      | 3 | 35.1         |
|             |            |                           | ALIATDPDR                                                                | 181 - 189      | 2 | 44.6         |
|             |            |                           | AR                                                                       | 181 - 221      | 3 | 75.9         |
|             |            |                           | AR                                                                       | 181 - 221      | 4 | 22.7         |
|             |            |                           | VPPLALPPLVDGTLGGTASGDLLQAIANDGAR                                         | 190 - 221      | 3 | 53.4         |
|             |            |                           | VEPLYSEWLTFIGISVDHAENR                                                   | 307 - 328      | 3 | 36.6         |
|             |            |                           | NAYM <sup>Ox</sup> DATM <sup>Ox</sup> AYR                                | 329 - 339      | 2 | 24.8         |
|             |            |                           | NAYMDATMAYR                                                              | 329 - 339      | 2 | 10.3         |
|             |            |                           | WGYTGEQAYLILGTSPIEGR                                                     | 352 - 371      | 3 | 55.3         |
|             |            |                           | GQVAVTS                                                                  | 409 - 415      | 1 | 16.0         |
| 15          | A0R4C9     | MSMEG_5789                | TVFVEVDEDTSAYDTGHIEGAVK                                                  | 22 - 44        | 3 | 47.9         |
|             |            |                           | DFVDAQQFSK <sup>PupylGGE</sup> LLSER                                     | 58 - 72        | 3 | 17.1         |
| 16          | A0R1V9     | MSMEG_4891                | ALLTIGDQFPEYDLTAVVGGDL SK                                                | 2-25           | 3 | 55.2         |
|             |            |                           | ALLTIGDQFPEYDLTAVVGGDL SK <sup>PupylGGE</sup> VDAK                       | 2-29           | 3 | 43.5         |
|             |            |                           | VDAK <sup>PupylGGE</sup> QPDDYFTR                                        | 26 - 37        | 3 | 53.1         |
|             |            |                           | VTSK <sup>PupylGGE</sup> DYEGK                                           | 38 - 46        | 2 | 41.5         |
|             |            |                           | LNEDFEDRDAK                                                              | 71 - 81        | 2 | 53.0         |
|             |            |                           | LNEDFEDRDAK                                                              | 71 - 81        | 3 | 12.5         |
|             |            |                           | VLGVSVDNEFVHFQWR                                                         | 82 - 97        | 3 | 36.2         |
|             |            |                           | AQHEDLKTLPFPMVSDLKR                                                      | 98 - 116       | 3 | 23.9         |
|             |            |                           | TLPFPMVSDLKR                                                             | 105 - 116      | 2 | 40.2         |
|             |            |                           | TLPFPM <sup>Ox</sup> VSDLKR                                              | 105 - 116      | 2 | 44.6         |
|             |            |                           | ELTAAC <sup>PAm</sup> GVLNADGVADR                                        | 117 - 133      | 2 | 118.2        |
|             |            |                           | ATFIVDPNNEVQFVSVTAGSVGR                                                  | 134 - 156      | 3 | 61.7         |
|             |            |                           | NVDEVLR                                                                  | 157 - 163      | 1 | 36.4         |
|             |            |                           | NVDEVLR                                                                  | 157 - 163      | 2 | 35.6         |
|             |            |                           | GDPTINAGELLAGAV                                                          | 181 - 195      | 2 | 42.8         |
| 17          | A0QUZ0     | MSMEG_2388                | M <sup>Ox</sup> EAFTHHTTGIGVPLR                                          | 1-15           | 3 | 38.5         |
|             |            |                           | SNVDTDQIIPAVYLK                                                          | 17 - 31        | 2 | 105.2        |
|             |            |                           | NDPSFILNLSPPFDK <sup>PupylGGE</sup> GSVLVAGPDFGTGSSR                     | 48 - 77        | 3 | 60.6         |
|             |            |                           | NDPSFILNLSPPFDK <sup>PupylGGE</sup> GSVLVAGPDFGTGSSR                     | 48 - 77        | 4 | 17.2         |
|             |            |                           | FADIFR                                                                   | 97 - 102       | 1 | 19.6         |
|             |            |                           | FADIFR                                                                   | 97 - 102       | 2 | 37.0         |
|             |            |                           | TVTAGTVVVPFR                                                             | 143 - 154      | 2 | 78.6         |
|             |            |                           | IDDYTR                                                                   | 155 - 160      | 1 | 21.8         |
|             |            |                           | IDDYTR                                                                   | 155 - 160      | 2 | 31.7         |
|             |            |                           | LLEGLDDIGLTLR                                                            | 163 - 175      | 2 | 88.0         |
| 19          | A0R1Y7     | MSMEG_4920                | DFSGTDLGAI AIR                                                           | 42 - 54        | 2 | 87.1         |
|             |            |                           | ANVPASM <sup>Ox</sup> VEYVIMGQVLTAGAGQMPAR                               | 60 - 86        | 3 | 52.9         |
|             |            |                           | ANVPASM <sup>Ox</sup> VEYVIM <sup>Ox</sup> GQVLTAGAGQMPAR                | 60 - 86        | 3 | 48.3         |
|             |            |                           | ANVPASM <sup>Ox</sup> VEYVIMGQVLTAGAGQM <sup>Ox</sup> PAR                | 60 - 86        | 3 | 65.5         |
|             |            |                           | ANVPASM <sup>Ox</sup> VEYVIM <sup>Ox</sup> GQVLTAGAGQM <sup>Ox</sup> PAR | 60 - 86        | 3 | 31.0         |
|             |            |                           | AGEFDVIVAGGQESMSQAPHLLPK                                                 | 123 - 146      | 3 | 47.5         |
|             |            |                           | AGEFDVIVAGGQESM <sup>Ox</sup> SQAPHLLPK                                  | 123 - 146      | 3 | 41.7         |
|             |            |                           | YGDATLVDHLAYDGLHDVFTDQPM <sup>Ox</sup> GALTEQR                           | 153 - 183      | 3 | 17.9         |
|             |            |                           | YGDATLVDHLAYDGLHDVFTDQPM <sup>Ox</sup> GALTEQR                           | 153 - 183      | 4 | 28.4         |
|             |            |                           | AEQDEYAAQSHQK                                                            | 192 - 204      | 3 | 16.0         |
|             |            |                           | AAAANK <sup>PupylGGE</sup> DGVFADEVVPSIPQR                               | 205 - 226      | 3 | 46.9         |
|             |            |                           | KGDPIEFAEDEGIR                                                           | 227 - 240      | 3 | 49.7         |
|             |            |                           | ANTTAESLAGLKPAFR                                                         | 241 - 256      | 3 | 14.9         |
|             |            |                           | EGITVDQLDVIEINEAFAVALASTK                                                | 323 - 348      | 3 | 57.7         |
|             |            |                           | VNVNGGAI AIGHPIGMSGAR                                                    | 357 - 376      | 2 | 41.4         |
|             |            |                           | VNVNGGAI AIGHPIGMSGAR                                                    | 357 - 376      | 3 | 39.8         |
|             |            |                           | VNVNGGAI AIGHPIGM <sup>Ox</sup> SGAR                                     | 357 - 376      | 2 | 29.0         |
|             |            |                           | IALHAALELAR                                                              | 377 - 387      | 2 | 69.0         |

## Supplement Table 2B

| Spot Number | Uniprot ID | Gene locus (M. smegmatis) | Peptid sequence                                        | Sequence range | z | Mascot score |
|-------------|------------|---------------------------|--------------------------------------------------------|----------------|---|--------------|
|             |            |                           | IALHAALELAR                                            | 377 - 387      | 3 | 43.3         |
| 20          | A0R0B3     | MSMEG_4326                | AATQEEIIAGLAEIIIEVTGIEPSEVTPEK                         | 2-31           | 3 | 44.6         |
|             |            |                           | TVGDVVAYIQK <sup>PupylGGE</sup> LEEENPEAAAAALR         | 69 - 92        | 3 | 70.9         |
|             |            |                           | TVGDVVAYIQK <sup>PupylGGE</sup> LEEENPEAAAAALREK       | 69 - 94        | 3 | 46.0         |
|             |            |                           | TVGDVVAYIQK <sup>PupylGGE</sup> LEEENPEAAAAALREK       | 69 - 94        | 4 | 14.9         |
| 24          | A0R652     | MSMEG_6427                | HHATYVK <sup>PupylGGE</sup> GVNDIAIK                   | 32 - 46        | 3 | 27.1         |
|             |            |                           | ANGDHAAIFLNEK                                          | 52 - 64        | 3 | 26.2         |
|             |            |                           | NLSPNGGDKPTGELAAAIDDQFGSFDK                            | 82 - 108       | 3 | 47.1         |
|             |            |                           | FQAQFTAAANGLQGSWAVLGYDSLGGRR                           | 109 - 136      | 3 | 72.6         |
|             |            |                           | AFWNVVNWDDVQNR                                         | 180 - 193      | 2 | 68.0         |
|             |            |                           | FAAATSK                                                | 194 - 200      | 1 | 24.2         |
|             |            |                           | TSGLIFG                                                | 201 - 207      | 1 | 21.0         |
| 25          | B6DAC1     | (Rv2111c)                 | RGGGGGDDDDIAGSTAAGQER                                  | 8-28           | 2 | 86.1         |
|             |            |                           | RGGGGGDDDDIAGSTAAGQER                                  | 8-28           | 3 | 29.5         |
|             |            |                           | RGGGGGDDDDIAGSTAAGQERR                                 | 8-29           | 2 | 55.7         |
|             |            |                           | RGGGGGDDDDIAGSTAAGQERR                                 | 9-28           | 3 | 109.8        |
|             |            |                           | GGGGGDDDDIAGSTAAGQER                                   | 9-28           | 2 | 99.4         |
|             |            |                           | GGGGGDDDDIAGSTAAGQER                                   | 9-29           | 3 | 55.8         |
|             |            |                           | GGGGGDDDDIAGSTAAGQERR                                  | 9-29           | 2 | 27.9         |
|             |            |                           | GGGGGDDDDIAGSTAAGQERR                                  | 8 - 29         | 3 | 79.9         |
|             |            |                           | REKLTEETD DLLLEIDDVLEENAEDFVR                          | 29 - 56        | 3 | 154.6        |
|             |            |                           | REKLTEETD DLLLEIDDVLEENAEDFVR                          | 29 - 56        | 4 | 30.0         |
|             |            |                           | EKLTEETD DLLLEIDDVLEENAEDFVR                           | 30 - 56        | 3 | 56.1         |
|             |            |                           | EKLTEETD DLLLEIDDVLEENAEDFVR                           | 30 - 56        | 4 | 27.3         |
|             |            |                           | LTEETD DLLLEIDDVLEENAEDFVR                             | 32 - 56        | 2 | 151.9        |
|             |            |                           | LTEETD DLLLEIDDVLEENAEDFVR                             | 32 - 56        | 3 | 95.8         |
|             |            |                           | AYVQK                                                  | 57 - 61        | 1 | 27.5         |
|             |            |                           | AYVQK <sup>PupylGGE</sup> GGQ                          | 57 - 64        | 2 | 30.0         |
| 26          | B6DAC1     | (Rv2111c)                 | RGGGGGDDDDIAGSTAAGQER                                  | 8-28           | 2 | 82.1         |
|             |            |                           | RGGGGGDDDDIAGSTAAGQER                                  | 8-28           | 3 | 32.5         |
|             |            |                           | RGGGGGDDDDIAGSTAAGQERR                                 | 8-29           | 2 | 64.1         |
|             |            |                           | RGGGGGDDDDIAGSTAAGQERR                                 | 8-29           | 3 | 79.8         |
|             |            |                           | GGGGGDDDDIAGSTAAGQER                                   | 9-28           | 2 | 112.9        |
|             |            |                           | GGGGGDDDDIAGSTAAGQER                                   | 9-28           | 3 | 57.5         |
|             |            |                           | GGGGGDDDDIAGSTAAGQERR                                  | 9-29           | 2 | 32.3         |
|             |            |                           | GGGGGDDDDIAGSTAAGQERR                                  | 9-29           | 3 | 59.4         |
|             |            |                           | REK <sup>PupylGGE</sup> LTEETD DLLLEIDDVLEENAEDFVR     | 29 - 56        | 4 | 28.3         |
|             |            |                           | EKLTEETD DLLLEIDDVLEENAEDFVR                           | 30 - 56        | 3 | 61.4         |
|             |            |                           | EK <sup>PupylGGE</sup> LTEETD DLLLEIDDVLEENAEDFVR      | 30 - 56        | 3 | 73.6         |
|             |            |                           | LTEETD DLLLEIDDVLEENAEDFVR                             | 32 - 56        | 3 | 79.8         |
|             |            |                           | AYVQK                                                  | 57 - 61        | 1 | 26.9         |
| 27          | B6DAC1     | (Rv2111c)                 | RGGGGGDDDDIAGSTAAGQER                                  | 8-28           | 2 | 10.3         |
|             |            |                           | RGGGGGDDDDIAGSTAAGQERR                                 | 8-29           | 3 | 42.4         |
|             |            |                           | GGGGGDDDDIAGSTAAGQER                                   | 9-28           | 3 | 58.1         |
|             |            |                           | GGGGGDDDDIAGSTAAGQERR                                  | 9-29           | 3 | 40.2         |
|             |            |                           | EKLTEETD DLLLEIDDVLEENAEDFVR                           | 30 - 56        | 3 | 61.4         |
|             |            |                           | EK <sup>PupylGGE</sup> LTEETD DLLLEIDDVLEENAEDFVR      | 30 - 56        | 3 | 5.8          |
|             |            |                           | LTEETD DLLLEIDDVLEENAEDFVR                             | 32 - 56        | 3 | 64.1         |
|             |            |                           | AYVQK                                                  | 57 - 61        | 1 | 24.5         |
| 27          | A0R4D0     | MSMEG_5790                | VVDGSGQAVGGAFVR                                        | 17 - 31        | 2 | 109.7        |
|             |            |                           | LLDGSDEFTA EVVASATGDFR                                 | 32 - 52        | 3 | 59.9         |
|             |            |                           | ALSSAGNGNVT VAPT GAGIHEVDVK <sup>PupylGGE</sup> VA     | 64 - 90        | 3 | 14.5         |
| 28          | A0R2W6     | MSMEG_5258                | SHDAAALESFVKR                                          | 2-14           | 3 | 62.3         |
|             |            |                           | YLDTVAGGSAADIAALYADDATVEDPVGSGEVHIGR                   | 15 - 50        | 3 | 89.0         |
|             |            |                           | YLDTVAGGSAADIAALYADDATVEDPVGSGEVHIGR                   | 15 - 50        | 4 | 57.5         |
|             |            |                           | QAIEGFYK <sup>PupylGGE</sup> NM <sup>Ox</sup> TAATTDIK | 51 - 68        | 3 | 10.8         |
|             |            |                           | IEPIEVM <sup>Ox</sup> TFDGDGR                          | 95 - 108       | 2 | 54.4         |

## Supplement Table 2B

| Spot Number | Uniprot ID | Gene locus (M. smegmatis) | Peptid sequence                                  | Sequence range | z | Mascot score |
|-------------|------------|---------------------------|--------------------------------------------------|----------------|---|--------------|
| 28          | A0R4D0     | MSMEG_5790                | VVDGSGQAVGGAFVR                                  | 17 - 31        | 2 | 105.2        |
|             |            |                           | FFAAPGTWTVR                                      | 53 - 63        | 2 | 46.8         |
|             |            |                           | ALSSAGNGNVTVAPTGAGIHEVDVK <sup>PupylGGE</sup> VA | 64 - 90        | 3 | 17.7         |

**Supplement Table 3A**

| Target number | Target ID in Table 1 | Gene locus (M. smegmatis) | Functional Annotation                                              | Gene locus (M. tuberculosis) | Functional categorization | Gene clusters |
|---------------|----------------------|---------------------------|--------------------------------------------------------------------|------------------------------|---------------------------|---------------|
| 1             | 1                    | MSMEG_0024                | Peptidyl-prolyl cis-trans isomerase                                | Rv0009                       | 2                         |               |
| 2             |                      | MSMEG_0216                | 3-hydroxyacyl-CoA dehydrogenase                                    | Rv1144                       | 7                         |               |
| 3             |                      | MSMEG_0220                | Monoglyceride lipase                                               | Rv0183                       | 7                         |               |
| 4             |                      | MSMEG_0224                | O-methyltransferase MdmC                                           | Rv0187                       | 7                         |               |
| 5             |                      | MSMEG_0234                | Metallopeptidase                                                   | Rv0198c                      | 7                         |               |
| 6             |                      | MSMEG_0372                | Oxidoreductase, short chain dehydrogenase/reductase family protein | Rv0242c                      | 1                         | 1             |
| 7             |                      | MSMEG_0373                | 3-ketoacyl-CoA thiolase                                            | Rv0243                       | 1                         |               |
| 8             | 2                    | MSMEG_0643                | Extracellular solute-binding protein, family protein 5             |                              |                           |               |
| 9             |                      | MSMEG_0702                | Monooxygenase                                                      | Rv0044c                      | 7                         |               |
| 10            |                      | MSMEG_0709                | Chaperone protein dnaK                                             | Rv0350                       | 0                         |               |
| 11            |                      | MSMEG_0732                | Chaperone ClpB                                                     | Rv0384c                      | 0                         |               |
| 12            |                      | MSMEG_0741                | Putative uncharacterized protein                                   | Rv3463                       | 10                        |               |
| 13            |                      | MSMEG_0768                | Putative uncharacterized protein                                   |                              |                           |               |
| 14            |                      | MSMEG_0777                | F420-dependent glucose-6-Phosphate dehydrogenase                   | Rv0407                       | 7                         |               |
| 15            |                      | MSMEG_0793                | Thiazole biosynthesis protein thiG                                 | Rv0417                       | 7                         |               |
| 16            |                      | MSMEG_0877                | Dihydrodipicolinate synthase                                       | Rv0439c                      | 7                         |               |
| 17            | 3                    | MSMEG_0880                | 60 kDa chaperonin 1                                                | Rv0440                       | 0                         |               |
| 18            |                      | MSMEG_0903                | Dihydrolipoyl dehydrogenase                                        | Rv0462                       | 7                         |               |
| 19            |                      | MSMEG_0909                | Acyl-ACP thioesterase superfamily protein                          | Rv0466                       | 10                        |               |
| 20            |                      | MSMEG_0935                | 2,3-bisphosphoglycerate-dependent phosphoglycerate mutase          | Rv0489                       | 7                         |               |
| 21            |                      | MSMEG_0943                | Pyrroline-5-carboxylate reductase                                  | Rv0500                       | 7                         |               |
| 22            |                      | MSMEG_0969                | Glutamate-1-semialdehyde-2,1-aminomutase                           | Rv0524                       | 7                         |               |
| 23            |                      | MSMEG_1028                | Geranylgeranyl reductase                                           | Rv0561c                      | 7                         |               |
| 24            |                      | MSMEG_1046                | ABC-type molybdenum transport system, ATPase component             | Rv3041c                      | 3                         | 2             |
| 25            |                      | MSMEG_1047                | Nudix hydrolase                                                    | Rv3040c                      | 10                        |               |
| 26            |                      | MSMEG_1165                | UPF0234 protein                                                    | Rv0566c                      | 10                        |               |
| 27            |                      | MSMEG_1305                | TetR family protein regulatory protein                             | Rv0238                       | 9                         |               |
| 28            |                      | MSMEG_1334                | Metallo-beta-lactamase family protein                              | Rv0634c                      | 0                         |               |
| 29            |                      | MSMEG_1347                | 50S ribosomal protein L1                                           | Rv0640                       | 2                         |               |



**Supplement Table 3A**

|    |   |            |                                           |         |    |   |
|----|---|------------|-------------------------------------------|---------|----|---|
| 30 |   | MSMEG_1364 | 50S ribomal protein L10                   | Rv0651  | 2  |   |
| 31 |   | MSMEG_1368 | DNA-directed RNA polymerase subunit beta' | Rv0668  | 2  |   |
| 32 |   | MSMEG_1383 | Endonuclease IV                           | Rv0670  | 2  |   |
| 33 |   | MSMEG_1387 | Putative acyl-CoA dehydrogenase           | Rv0673  | 1  |   |
| 34 |   | MSMEG_1399 | 30S ribomal protein S7                    | Rv0683  | 2  |   |
| 35 | 4 | MSMEG_1401 | Elongation factor Tu                      | Rv0685  | 2  |   |
| 36 |   | MSMEG_1435 | 30S ribomal protein S10                   | Rv0700  | 2  | 3 |
| 37 |   | MSMEG_1436 | 50S ribomal protein L3                    | Rv0701  | 2  |   |
| 38 |   | MSMEG_1437 | 50S ribomal protein L4                    | Rv0702  | 2  |   |
| 39 |   | MSMEG_1439 | 50S ribomal protein L2                    | Rv0704  | 2  |   |
| 40 |   | MSMEG_1440 | 30S ribomal protein S19                   | Rv0705  | 2  |   |
| 41 |   | MSMEG_1442 | 30S ribomal protein S3                    | Rv0707  | 2  |   |
| 42 |   | MSMEG_1443 | 50S ribomal protein L16                   | Rv0708  | 2  |   |
| 43 |   | MSMEG_1445 | 30S ribomal protein S17                   | Rv0709  | 2  |   |
| 44 |   | MSMEG_1466 | 50S ribomal protein L24                   | Rv0715  | 2  |   |
| 45 |   | MSMEG_1467 | 50S ribomal protein L5                    | Rv0716  | 2  |   |
| 46 |   | MSMEG_1470 | 50S ribomal protein L6                    | Rv0719  | 2  |   |
| 47 |   | MSMEG_1471 | Ribomal protein L18                       | Rv0720  | 2  |   |
| 48 |   | MSMEG_1472 | 30S ribomal protein S5                    | Rv0721  | 2  |   |
| 49 |   | MSMEG_1474 | 50S ribomal protein L15                   | Rv0723  | 2  |   |
| 50 | 5 | MSMEG_1484 | Adenylate kinase                          | Rv0733  | 7  |   |
| 51 |   | MSMEG_1513 | Putative uncharacterized protein          | Rv3463  | 10 |   |
| 52 |   | MSMEG_1521 | 30S ribomal protein S13                   | Rv3460c | 2  | 4 |
| 53 | 6 | MSMEG_1522 | 30S ribomal protein S11                   | Rv3459c | 2  |   |
| 54 |   | MSMEG_1524 | DNA-directed RNA polymerase subunit alpha | Rv3457c | 2  |   |
| 55 |   | MSMEG_1557 | 30S ribomal protein S9                    | Rv3455c | 2  |   |
| 56 |   | MSMEG_1583 | 60 kDa chaperonin 2                       | Rv3417c | 0  |   |
| 57 |   | MSMEG_1603 | IMP dehydrogenase family protein          | Rv3410c | 7  |   |
| 58 |   | MSMEG_1634 | Probable forkhead-associated protein      |         |    |   |
| 59 |   | MSMEG_1647 | Bifunctional protein fold                 | Rv3356c | 7  |   |
| 60 |   | MSMEG_1652 | O-acetylhomoserine sulfhydrylase          | Rv3340  | 7  |   |
| 61 |   | MSMEG_1654 | Isocitrate dehydrogenase, NADP-dependent  | Rv0066c | 7  |   |
| 62 |   | MSMEG_1662 | Taurine-pyruvate aminotransferase         | Rv3329  | 7  |   |

### Supplement Table 3A

|    |    |            |                                                              |         |    |       |
|----|----|------------|--------------------------------------------------------------|---------|----|-------|
| 63 |    | MSMEG_1665 | Aldehyde dehydrogenase (NAD) family protein                  |         |    |       |
| 64 |    | MSMEG_1670 | Succinate dehydrogenase, flavoprotein subunit                | Rv3318  | 7  |       |
| 65 |    | MSMEG_1684 | Putative uncharacterized protein                             | Rv3311  | 10 |       |
| 66 |    | MSMEG_1803 | RsbW protein                                                 |         |    |       |
| 67 |    | MSMEG_1807 | Acetyl-/propionyl-coenzyme A carboxylase alpha chain         | Rv3285  | 1  |       |
| 68 |    | MSMEG_1809 | Putative thiulfate sulfurtransferase                         | Rv3283  | 7  |       |
| 69 |    | MSMEG_1878 | S30AE family protein                                         | Rv3241c | 2  |       |
| 70 |    | MSMEG_2026 | Short chain dehydrogenase                                    | Rv1245c | 7  |       |
| 71 |    | MSMEG_2072 | 3-hydroxy-3-methylglutaryl-CoA lyase                         |         |    |       |
| 72 |    | MSMEG_2080 | Putative acyl-CoA dehydrogenase                              | Rv3140  | 1  |       |
| 73 |    | MSMEG_2086 | Peptide chain release factor 2                               | Rv3105c | 2  |       |
| 74 |    | MSMEG_2123 | Dihydroxyacetone kinase, DhaK subunit                        |         |    |       |
| 75 |    | MSMEG_2351 | Electron transfer flavoprotein, beta subunit                 | Rv3029c | 7  | 5     |
| 76 | 7  | MSMEG_2352 | Electron transfer flavoprotein, alpha subunit                | Rv3028c | 7  |       |
| 77 |    | MSMEG_2367 | Aspartyl/glutamyl-tRNA(Asn/Gln) amidotransferase subunit B   | Rv3009c | 2  | 6     |
| 78 |    | MSMEG_2373 | Acetolactate synthase, small subunit                         | Rv3002c | 7  |       |
| 79 |    | MSMEG_2374 | Ketol-acid reductoisomerase                                  | Rv3001c | 7  |       |
| 80 |    | MSMEG_2378 | D-3-phosphoglycerate dehydrogenase                           | Rv2996c | 7  | 7     |
| 81 | 8  | MSMEG_2379 | 3-isopropylmalate dehydrogenase                              | Rv2995c | 7  |       |
| 82 |    | MSMEG_2382 | 5-carboxymethyl-2-hydroxymuconate delta-isomerase            | Rv2993c | 2  | 8 (l) |
| 83 | 9  | MSMEG_2387 | 3-isopropylmalate dehydratase, large subunit                 | Rv2988c | 7  |       |
| 84 | 10 | MSMEG_2388 | 3-isopropylmalate dehydratase, small subunit                 | Rv2987c | 7  |       |
| 85 |    | MSMEG_2407 | Morphine 6-dehydrogenase                                     | Rv2971  | 2  | 9     |
| 86 |    | MSMEG_2408 | 2,5-diketo-D-gluconic acid reductase A                       | Rv2971  | 2  |       |
| 87 |    | MSMEG_2435 | 30S ribosomal protein S16                                    | Rv2909c | 2  | 10    |
| 88 |    | MSMEG_2443 | Putative uncharacterized protein                             | Rv2901c | 10 |       |
| 89 |    | MSMEG_2511 | Siderophore utilization protein                              | Rv2895c | 7  |       |
| 90 |    | MSMEG_2519 | 30S ribosomal protein S2                                     | Rv2890c | 2  | 10    |
| 91 | 11 | MSMEG_2520 | Elongation factor Ts                                         | Rv2889c | 2  |       |
| 92 |    | MSMEG_2541 | Ribosome-recycling factor                                    | Rv2882c | 2  |       |
| 93 |    | MSMEG_2611 | Pyridine nucleotide-disulphide oxidoreductase family protein | Rv2855  | 7  |       |
| 94 |    | MSMEG_2613 | Probable malate:quinone oxidoreductase                       | Rv2852c | 7  |       |
| 95 |    | MSMEG_2654 | 30S ribosomal protein S15                                    | Rv2785c | 2  |       |

**Supplement Table 3A**

|     |    |            |                                                      |         |    |         |
|-----|----|------------|------------------------------------------------------|---------|----|---------|
| 96  |    | MSMEG_2659 | Alanine dehydrogenase                                | Rv2780  | 7  |         |
| 97  |    | MSMEG_2669 | Hydrolase                                            | Rv2765  | 7  |         |
| 98  |    | MSMEG_2684 | Dihydrodipicolinate synthase                         | Rv2753c | 7  |         |
| 99  |    | MSMEG_2731 | ATPase involved in DNA repair                        | Rv2731  | 10 |         |
| 100 |    | MSMEG_2744 | Thymidylate synthase                                 | Rv2716  | 10 |         |
| 101 |    | MSMEG_2750 | Iron-dependent repressor IdeR                        | Rv2711  | 9  |         |
| 102 |    | MSMEG_2782 | Putative uncharacterized protein                     | Rv2676c | 10 |         |
| 103 | 12 | MSMEG_2937 | Pyridoxal biynthesis lyase pdxS                      | Rv2606c | 7  |         |
| 104 |    | MSMEG_3050 | Integration ht factor                                | Rv1388  | 2  |         |
| 105 | 13 | MSMEG_3055 | S-adenylmethionine synthetase                        | Rv1392  | 7  |         |
| 106 |    | MSMEG_3072 | Riboflavin biynthesis protein ribAB                  | Rv1415  | 7  |         |
| 107 | 14 | MSMEG_3081 | Putative uncharacterized protein                     | Rv1423  | 9  | 11 (II) |
| 108 | 15 | MSMEG_3084 | Glyceraldehyde-3-phosphate dehydrogenase, type I     | Rv1436  | 7  |         |
| 109 |    | MSMEG_3085 | Phosphoglycerate kinase                              | Rv1437  | 7  | 12      |
| 110 |    | MSMEG_3086 | Triphosphate isomerase                               | Rv1438  | 7  |         |
| 111 | 16 | MSMEG_3102 | Transaldolase                                        | Rv1448c | 7  |         |
| 112 |    | MSMEG_3106 | Quinone oxidoreductase                               | Rv1454c | 7  |         |
| 113 |    | MSMEG_3124 | FeS assembly ATPase SufC                             | Rv1463  | 3  |         |
| 114 |    | MSMEG_3143 | Aconitate hydratase 1 (Putative aconitate hydratase) | Rv1475c | 7  |         |
| 115 |    | MSMEG_3151 | Enoyl-[acyl-carrier-protein] reductase [NADH]        | Rv1484  | 1  |         |
| 116 | 17 | MSMEG_3205 | Histidinol dehydrogenase                             | Rv1599  | 7  |         |
| 117 |    | MSMEG_3207 | Imidazoleglycerol-phosphate dehydratase              | Rv1601  | 7  |         |
| 118 |    | MSMEG_3220 | Tryptophan synthase, beta subunit                    | Rv1612  | 7  |         |
| 119 |    | MSMEG_3227 | Pyruvate kinase                                      | Rv1617  | 7  |         |
| 120 |    | MSMEG_3255 | DoxX subfamily protein, putative                     |         |    |         |
| 121 |    | MSMEG_3308 | Universal stress protein family protein, putative    | Rv1636  | 10 |         |
| 120 | 18 | MSMEG_3461 | Catalase-peroxidase 2                                | Rv1908c | 0  |         |
| 123 |    | MSMEG_3478 | Tena/thi-4 family protein                            |         |    |         |
| 124 |    | MSMEG_3507 | Fructose-bisphosphate aldolase class-I               |         |    |         |
| 125 |    | MSMEG_3619 | Short chain dehydrogenase                            | Rv1856c | 7  | 13      |
| 126 |    | MSMEG_3620 | Putative uncharacterized protein                     | Rv1855c | 7  |         |
| 127 |    | MSMEG_3640 | Malate synthase G                                    | Rv1837c | 7  |         |
| 128 |    | MSMEG_3770 | Argininuccinate synthase                             | Rv1658  | 7  |         |

### Supplement Table 3A

|     |    |            |                                                                   |         |    |          |
|-----|----|------------|-------------------------------------------------------------------|---------|----|----------|
| 129 |    | MSMEG_3811 | Universal stress protein family protein, putative                 | Rv1636  | 10 |          |
| 130 |    | MSMEG_3833 | 30S ribosomal protein S1                                          | Rv1630  | 2  |          |
| 131 |    | MSMEG_3880 | Nitrilase/cyanide hydratase and apolipoprotein N-acyltransferase  | Rv2074  | 7  | 14       |
| 132 |    | MSMEG_3881 | Proline dipeptidase                                               | Rv2075c | 3  |          |
| 133 |    | MSMEG_3894 | Proteasome alpha subunit                                          | Rv2109c | 7  | 15       |
| 134 |    | MSMEG_3895 | Proteasome beta subunit                                           | Rv2110c | 7  |          |
| 135 |    | MSMEG_3902 | ATPase, AAA family protein                                        | Rv2115c | 3  |          |
| 136 |    | MSMEG_3906 | TRNA (Adenine-N(1)-)-methyltransferase                            | Rv2118c | 7  |          |
| 137 |    | MSMEG_3932 | 14 kDa antigen                                                    | Rv2031c | 0  |          |
| 138 |    | MSMEG_3945 | Universal stress protein family protein                           | Rv2028c | 10 |          |
| 139 | 19 | MSMEG_3950 | Universal stress protein family protein                           | Rv2026c | 10 |          |
| 140 |    | MSMEG_4121 | GntR-family protein transcriptional regulator                     |         |    |          |
| 141 |    | MSMEG_4222 | Cell division protein ftsZ                                        | Rv2150c | 3  |          |
| 142 |    | MSMEG_4270 | Adenine kinase                                                    | Rv2202c | 7  | 16       |
| 143 |    | MSMEG_4272 | HesB/YadR/YfhF family protein                                     | Rv2204c | 10 |          |
| 144 |    | MSMEG_4276 | Branched-chain amino acid aminotransferase                        | Rv2210c | 7  |          |
| 145 |    | MSMEG_4278 | Aminomethyltransferase                                            | Rv2211c | 7  |          |
| 146 |    | MSMEG_4281 | Cytol aminopeptidase                                              | Rv2213  | 7  | 17       |
| 147 |    | MSMEG_4283 | 2-oxoglutarate dehydrogenase, E2 component, dihydrolipoamide succ | Rv2215  | 7  |          |
| 148 |    | MSMEG_4290 | Glutamine synthetase                                              | Rv2220  | 7  |          |
| 149 |    | MSMEG_4306 | Putative uncharacterized protein                                  | Rv2229c | 10 |          |
| 150 |    | MSMEG_4313 | Glyoxalase/bleomycin resistance protein/dioxygenase               |         |    |          |
| 151 |    | MSMEG_4323 | Pyruvate dehydrogenase E1 component                               | Rv2241  | 7  | 18 (III) |
| 152 |    | MSMEG_4325 | Malonyl CoA-acyl carrier protein transacylase                     | Rv2243  | 1  |          |
| 153 | 20 | MSMEG_4326 | Acyl carrier protein                                              | Rv2244  | 1  |          |
| 154 | 21 | MSMEG_4327 | 3-oxoacyl-[acyl-carrier-protein] synthase 1                       | Rv2245  | 1  |          |
| 155 | 22 | MSMEG_4328 | 3-oxoacyl-[acyl-carrier-protein] synthase 2                       | Rv2246  | 1  |          |
| 156 |    | MSMEG_4362 | Universal stress protein family protein                           |         |    |          |
| 157 |    | MSMEG_4401 | Phosphonoacetaldehyde hydrolase                                   |         |    |          |
| 158 |    | MSMEG_4474 | Acyl-CoA oxidase                                                  |         |    |          |
| 159 |    | MSMEG_4476 |                                                                   |         |    |          |
| 160 |    | MSMEG_4487 | Ferric uptake regulation protein                                  | Rv2359  | 9  |          |
| 161 |    | MSMEG_4504 | Chaperone protein DnaJ                                            | Rv2373c | 0  |          |

**Supplement Table 3A**

|     |    |            |                                                            |         |    |         |
|-----|----|------------|------------------------------------------------------------|---------|----|---------|
| 160 | 23 | MSMEG_4527 | Ferredoxin sulfite reductase                               | Rv2391  | 7  |         |
| 161 | 24 | MSMEG_4530 | Sulfate ABC transporter, ATP-binding protein               | Rv2397c | 3  |         |
| 164 |    | MSMEG_4533 | Sulfate-binding protein                                    | Rv2400c | 3  |         |
| 165 |    | MSMEG_4645 | Alpha oxoglutarate ferredoxin oxidoreductase, beta subunit | Rv2454c | 7  |         |
| 166 |    | MSMEG_4673 | ATP-dependent Clp protease proteolytic subunit             | Rv2461c | 7  | 19      |
| 167 |    | MSMEG_4674 | Trigger factor                                             | Rv2462c | 3  |         |
| 168 |    | MSMEG_4742 | Clavaldehyde dehydrogenase                                 | Rv0484c | 7  |         |
| 169 |    | MSMEG_4752 | Putative uncharacterized protein                           | Rv2520c | 3  |         |
| 170 |    | MSMEG_4755 | Peptidase M20                                              | Rv2522c | 10 |         |
| 171 | 25 | MSMEG_4891 | Alkylhydroperoxide reductase                               | Rv2428  | 0  |         |
| 172 | 26 | MSMEG_4920 | Acetyl-CoA acetyltransferase                               | Rv1323  | 1  |         |
| 173 |    | MSMEG_4921 |                                                            |         |    |         |
| 174 |    | MSMEG_4935 | ATP synthase epsilon chain                                 | Rv1311  | 7  | 20      |
| 175 |    | MSMEG_4936 | ATP synthase subunit beta                                  | Rv1312  | 3  |         |
| 176 |    | MSMEG_4938 | ATP synthase subunit alpha                                 | Rv1308  | 7  |         |
| 177 |    | MSMEG_4939 | ATP synthase delta chain                                   | Rv1307  | 7  |         |
| 178 | 27 | MSMEG_4954 | Transcription termination factor Rho                       | Rv1297  | 2  | 21 (IV) |
| 179 | 28 | MSMEG_4956 | Threonine synthase                                         | Rv1295  | 7  |         |
| 180 |    | MSMEG_5015 | Secreted protein                                           |         |    |         |
| 181 |    | MSMEG_5087 | Putative uncharacterized protein                           | Rv1205  | 10 |         |
| 182 | 29 | MSMEG_5104 | Tetrahydropicolinate succinylase                           | Rv1201c | 7  |         |
| 183 |    | MSMEG_5136 | Helix-turn-helix motif                                     | Rv0080  | 10 |         |
| 184 |    | MSMEG_5222 | GTP-binding protein YchF                                   | Rv1112  | 10 |         |
| 185 |    | MSMEG_5239 | Fructe-1,6-bisphosphatase, class II                        | Rv1099c | 7  | 22      |
| 186 |    | MSMEG_5240 | Fumarate hydratase class II                                | Rv1098c | 7  |         |
| 187 |    | MSMEG_5243 | Helix-turn-helix motif                                     | Rv3129  | 10 | 23      |
| 188 |    | MSMEG_5245 | Universal stress protein family protein                    | Rv3134c | 10 |         |
| 189 |    | MSMEG_5246 | Putative uncharacterized protein                           | Rv3131  | 10 |         |
| 190 | 30 | MSMEG_5249 | Serine hydroxymethyltransferase                            | Rv1093  | 7  |         |
| 191 | 31 | MSMEG_5258 | Steroid delta-isomerase                                    |         |    |         |
| 192 |    | MSMEG_5261 | Mycothiol conjugate amidase Mca                            | Rv1082  | 0  |         |
| 193 |    | MSMEG_5270 | Cystathionine beta-synthase                                | Rv1077  | 7  |         |
| 194 |    | MSMEG_5273 | Beta-ketoadipyl CoA thiolase                               | Rv1074  | 1  |         |

**Supplement Table 3A**

|     |    |            |                                                           |         |    |        |
|-----|----|------------|-----------------------------------------------------------|---------|----|--------|
| 195 | 32 | MSMEG_5335 | Formamidase                                               |         |    | 24     |
| 196 |    | MSMEG_5336 | Amidate substrates transporter protein                    |         |    |        |
| 197 |    | MSMEG_5415 | Enolase                                                   | Rv1023  | 7  |        |
| 198 |    | MSMEG_5427 | Ribe-phosphate pyrophosphokinase                          | Rv1017c | 7  |        |
| 199 | 33 | MSMEG_5431 | Ribomal protein L25, Ctc-form                             | Rv1015c | 2  |        |
| 200 |    | MSMEG_5442 | Glutamate dehydrogenase                                   |         |    |        |
| 201 |    | MSMEG_5512 | Magnesium chelatase                                       | Rv0958  | 7  |        |
| 202 |    | MSMEG_5524 | Succinyl-CoA ligase [ADP-forming] subunit alpha           | Rv0952  | 7  | 25     |
| 203 |    | MSMEG_5525 | Succinyl-CoA ligase [ADP-forming] subunit beta            | Rv0951  | 7  |        |
| 204 |    | MSMEG_5538 | [NADP+] succinate-semialdehyde dehydrogenase              |         |    |        |
| 205 |    | MSMEG_5612 | Amino-acid acetyltransferase                              | Rv0995  | 2  |        |
| 206 |    | MSMEG_5639 | Enoyl-CoA hydratase                                       | Rv0905  | 1  |        |
| 207 |    | MSMEG_5672 | Citrate synthase                                          | Rv0896  | 7  |        |
| 208 |    | MSMEG_5707 | Cupin domain protein                                      | Rv2619c | 10 |        |
| 209 |    | MSMEG_5715 | Putative uncharacterized protein                          | Rv0791c | 10 |        |
| 210 |    | MSMEG_5727 | Allantoicase                                              |         |    |        |
| 211 |    | MSMEG_5733 | Universal stress protein family protein                   | Rv2624c | 10 |        |
| 212 |    | MSMEG_5773 | Fatty acid desaturase                                     | Rv0824c | 1  |        |
| 213 |    | MSMEG_5776 | Phosphate transport system regulatory protein PhoU        | Rv0821c | 3  |        |
| 214 | 34 | MSMEG_5789 | Putative thiulfate sulfurtransferase                      | Rv0815c | 7  | 26 (V) |
| 215 | 35 | MSMEG_5790 | SseC protein                                              | Rv0814c | 7  |        |
| 216 |    | MSMEG_5824 | Phosphoribylformylglycinamide synthase II                 | Rv0803  | 7  |        |
| 217 |    | MSMEG_5830 | 29 kDa antigen Cfp29                                      | Rv0798c | 0  | 27     |
| 218 |    | MSMEG_5832 | Phosphoribylformylglycinamide synthase, PurS protein      |         |    |        |
| 219 | 36 | MSMEG_6008 | Acetyl-CoA acetyltransferase                              | Rv3556c | 1  |        |
| 220 |    | MSMEG_6082 | Carbonic anhydrase                                        | Rv3588c | 7  |        |
| 221 |    | MSMEG_6091 | Negative regulator of genetic competence ClpC/mecB        | Rv3596c | 7  |        |
| 222 |    | MSMEG_6114 | Inorganic pyrophosphatase                                 | Rv3628  | 7  |        |
| 223 |    | MSMEG_6142 | Nucleide-diphosphate-sugar epimerase                      | Rv3634c | 7  |        |
| 224 |    | MSMEG_6189 | Transcriptional regulator, Crp/Fnr family protein         | Rv3676  | 9  |        |
| 225 |    | MSMEG_6235 | Thiopurine S-methyltransferase (Tpmt) superfamily protein | Rv3699  | 10 |        |
| 226 | 37 | MSMEG_6247 | Putative uncharacterized protein                          | Rv3701c | 10 |        |
| 227 |    | MSMEG_6256 | Aspartate-semialdehyde dehydrogenase                      | Rv3708c | 7  |        |

**Supplement Table 3A**

|     |    |            |                                                    |         |    |         |
|-----|----|------------|----------------------------------------------------|---------|----|---------|
| 228 | 38 | MSMEG_6284 | Cyclopropane-fatty-acyl-phospholipid synthase      | Rv3720  | 1  | 28 (VI) |
| 229 | 39 | MSMEG_6286 | Aspartate transaminase                             | Rv3722c | 10 |         |
| 230 |    | MSMEG_6384 | Catalase-peroxidase 1                              | Rv1908c | 0  |         |
| 231 |    | MSMEG_6393 | Acyl-CoA synthase                                  | Rv3801c | 1  |         |
| 232 |    | MSMEG_6398 | Antigen 85-A                                       | Rv3803c | 1  |         |
| 233 |    | MSMEG_6422 | Ferritin family protein                            | Rv3841  | 7  |         |
| 234 | 40 | MSMEG_6427 | Superoxide dismutase                               | Rv3846  | 0  |         |
| 235 | 41 | MSMEG_6518 | Putative uncharacterized protein                   | Rv3863  | 10 |         |
| 236 |    | MSMEG_6636 | Superoxide dismutase                               | Rv3846  | 0  |         |
| 237 |    | MSMEG_6746 | Oxidoreductase, aldo/keto reductase family protein |         |    |         |
| 238 |    | MSMEG_6759 | Glycerol kinase                                    | Rv3696c | 7  |         |
| 239 |    | MSMEG_6896 | Single-stranded DNA-binding protein                | Rv0054  | 2  | 29      |
| 240 |    | MSMEG_6897 | Ribomal protein S6                                 | Rv0053  | 2  |         |
| 241 |    | MSMEG_6904 | Myo-initol-1-phosphate synthase                    | Rv0046c | 7  |         |
| 242 |    | MSMEG_6907 | Mmcl protein                                       | Rv0044c | 7  |         |
| 243 |    | MSMEG_6933 | Thioredoxin reductase                              | Rv3913  | 7  |         |

Supplement Table 3B

| Category | Functional Categorization               | Number of genes (proteome) | Relative distribution (proteome) | Number of confirmed PUP targets | Relative distribution confirmed PUP targets | Number of pup candidate targets | Relative distribution of pup candidate targets |
|----------|-----------------------------------------|----------------------------|----------------------------------|---------------------------------|---------------------------------------------|---------------------------------|------------------------------------------------|
| 0        | Virulence, detoxification, adaptation   | 99                         | 2.4                              | 14                              | 6.5                                         | 14                              | 6.5                                            |
| 1        | Lipid metabolism                        | 233                        | 5.8                              | 18                              | 8.3                                         | 18                              | 8.3                                            |
| 2        | Information pathways                    | 229                        | 5.7                              | 43                              | 19.8                                        | 43                              | 19.8                                           |
| 3        | Cell wall and cell processes            | 708                        | 17.5                             | 11                              | 5.1                                         | 11                              | 5.1                                            |
| 4        | Stable RNAs                             | 50                         | 1.2                              | 0                               | 0                                           | 0                               | 0.0                                            |
| 5        | Insertion seqs and phages               | 149                        | 3.7                              | 0                               | 0                                           | 0                               | 0.0                                            |
| 6        | PE/PPE                                  | 170                        | 4.2                              | 0                               | 0                                           | 0                               | 0.0                                            |
| 7        | Intermediary metabolism and respiration | 894                        | 22.1                             | 96                              | 44.2                                        | 96                              | 44.2                                           |
| 8        | Proteins of unknown function            | 272                        | 6.7                              | 0                               | 0                                           | 0                               | 0.0                                            |
| 9        | Regulatory proteins                     | 189                        | 4.7                              | 5                               | 2.3                                         | 5                               | 2.3                                            |
| 10       | Conserved hypotheticals                 | 1051                       | 26                               | 30                              | 13.8                                        | 30                              | 13.8                                           |
| Total    |                                         | 4044                       | 100                              | 217                             | 100                                         | 217                             | 100                                            |



**Supplement Table 4**

| 2D Gel spots No.<br>(Supplement<br>Figure 3) | Target No.<br>(Supplement Table 3A) | Target ID<br>(Table 1) | Gene locus<br>( <i>M. smegmatis</i> ) | Detected Pupylation Sequences                       | Pupylated<br>lysines | Spot intensity<br>(stationary phase,<br>panel A) | Spot intensity<br>(log phase,<br>panel B) | Spot intensity<br>(oxidative stress,<br>panel C) |
|----------------------------------------------|-------------------------------------|------------------------|---------------------------------------|-----------------------------------------------------|----------------------|--------------------------------------------------|-------------------------------------------|--------------------------------------------------|
| 9                                            | 108                                 | 15                     | MSMEG_3084                            | AAAEGPLK <sup>PupylGGE</sup> GILK                   | K277                 | +                                                | +                                         | ++                                               |
| 16                                           | 139                                 | 19                     | MSMEG_3950                            | YPDVK <sup>PupylGGE</sup> VHR                       | K234                 | +++                                              | ++                                        | +++                                              |
| 50                                           | 81                                  | 8                      | MSMEG_2379                            | VDK <sup>PupylGGE</sup> AVSEHLATR                   | K313                 | ++                                               | +++                                       | +++                                              |
| 10                                           | 91                                  | 11                     | MSMEG_2520                            | IGEK <sup>PupylGGE</sup> LELR                       | K36                  | ++                                               | +                                         | +++                                              |
| 6                                            | 120                                 | 18                     | MSMEG_3461                            | NYVRPGEK <sup>PupylGGE</sup> VQLEK                  | K401                 | +                                                | ++                                        | +                                                |
| 56                                           | 125                                 | n.d.                   | MSMEG_3619                            | RDDLEVAAK <sup>PupylGGE</sup> ELDIESIVFDNTDAASLEAVR | K43                  | +                                                | +++                                       | +++                                              |
