# Supplementary figures and images for: Proteome-wide identification of mycobacterial pupylation targets
Source: PubMed Central journal article supplement — Mol Syst Biol. 2010 Jul 13;6:386. doi: 10.1038/msb.2010.39 (PMC2925521; doi:10.1038/msb.2010.39), 2010-07-13

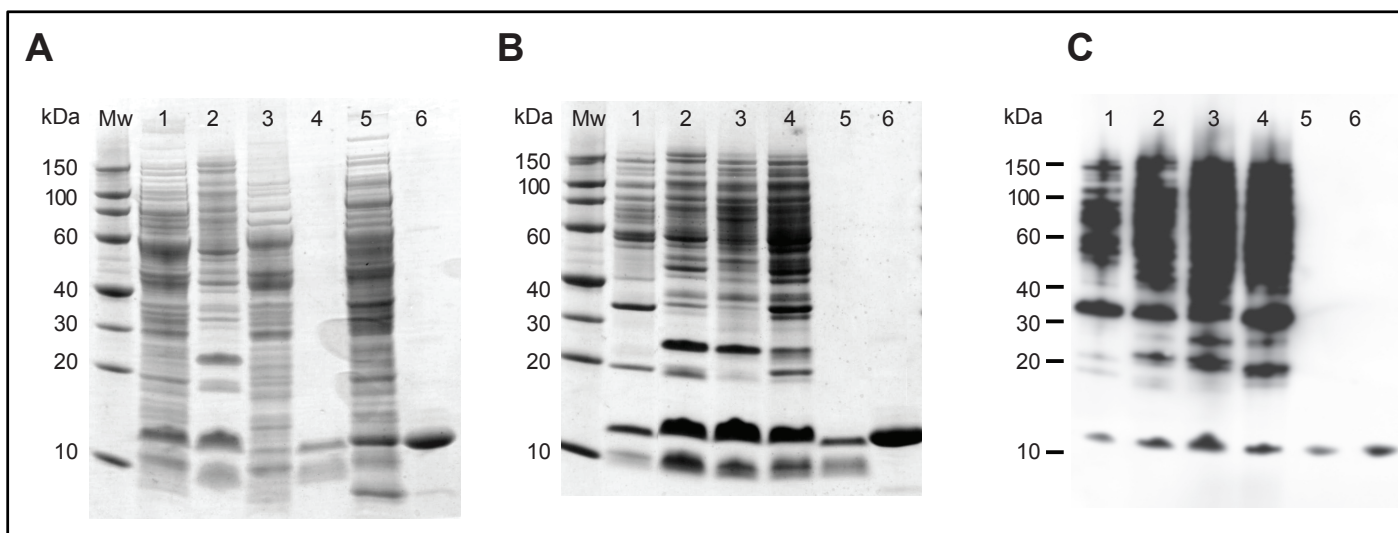

**Supplement Figure 1**

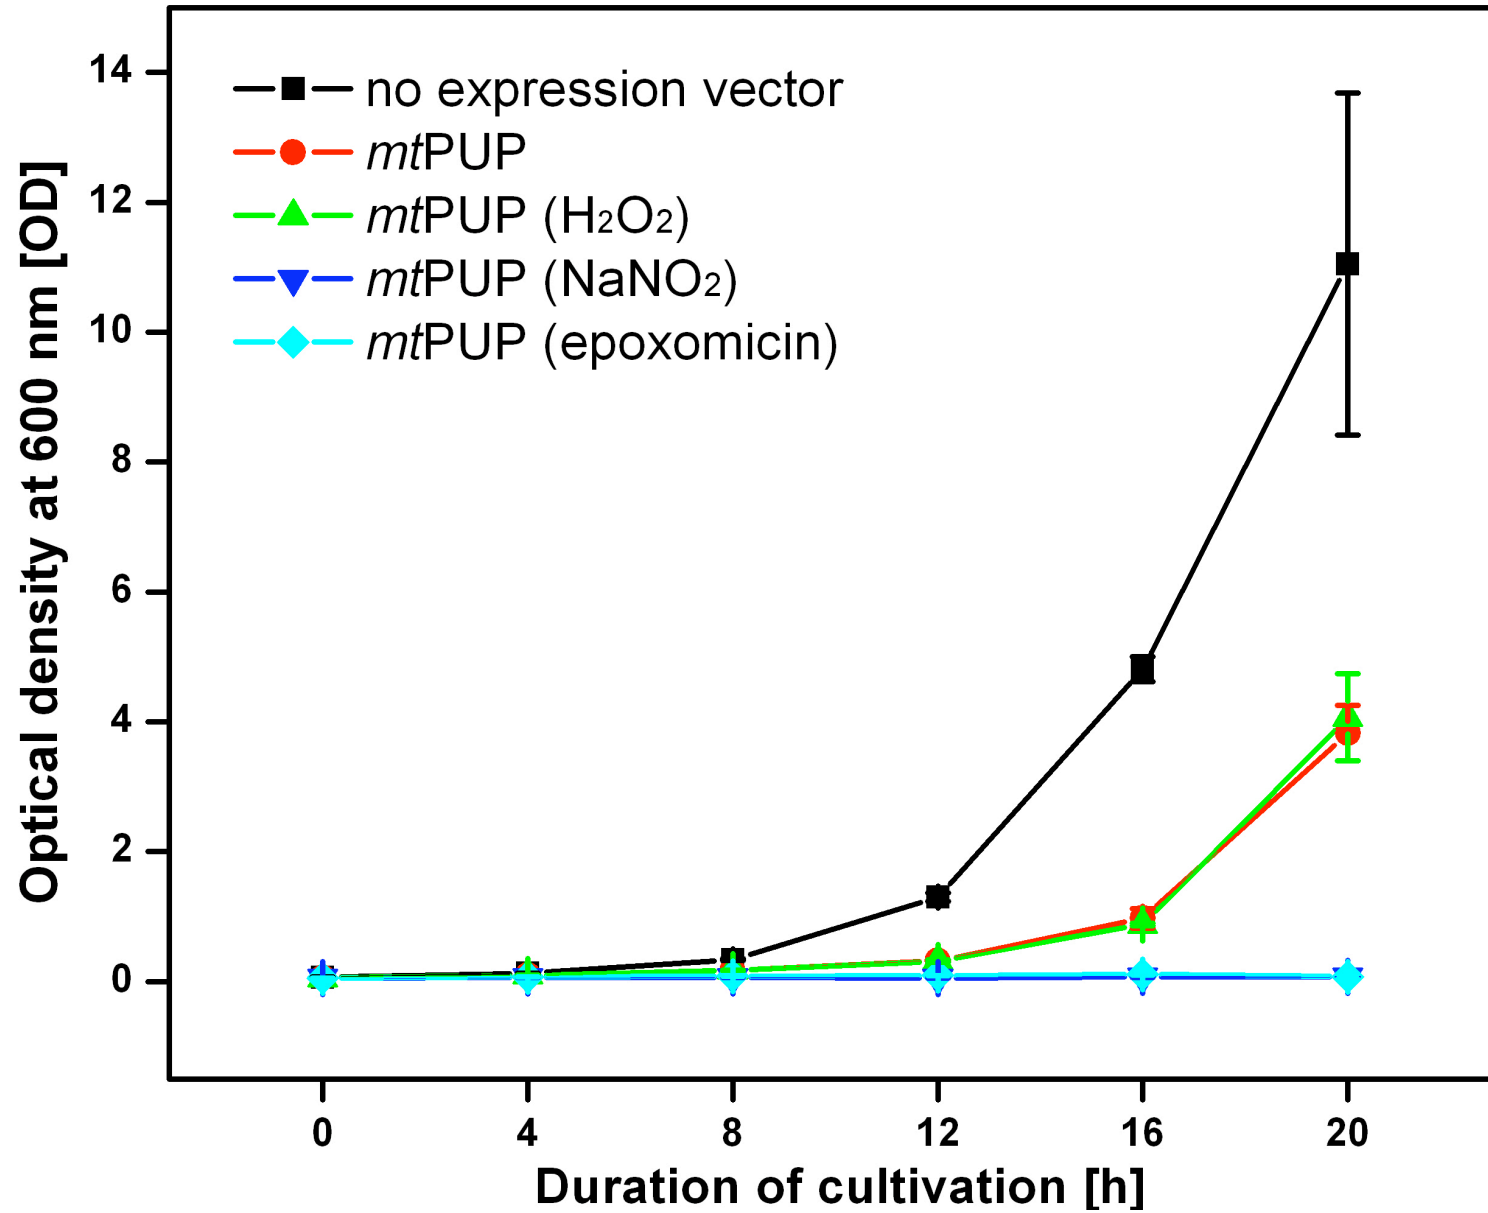

Supplement Figure 2

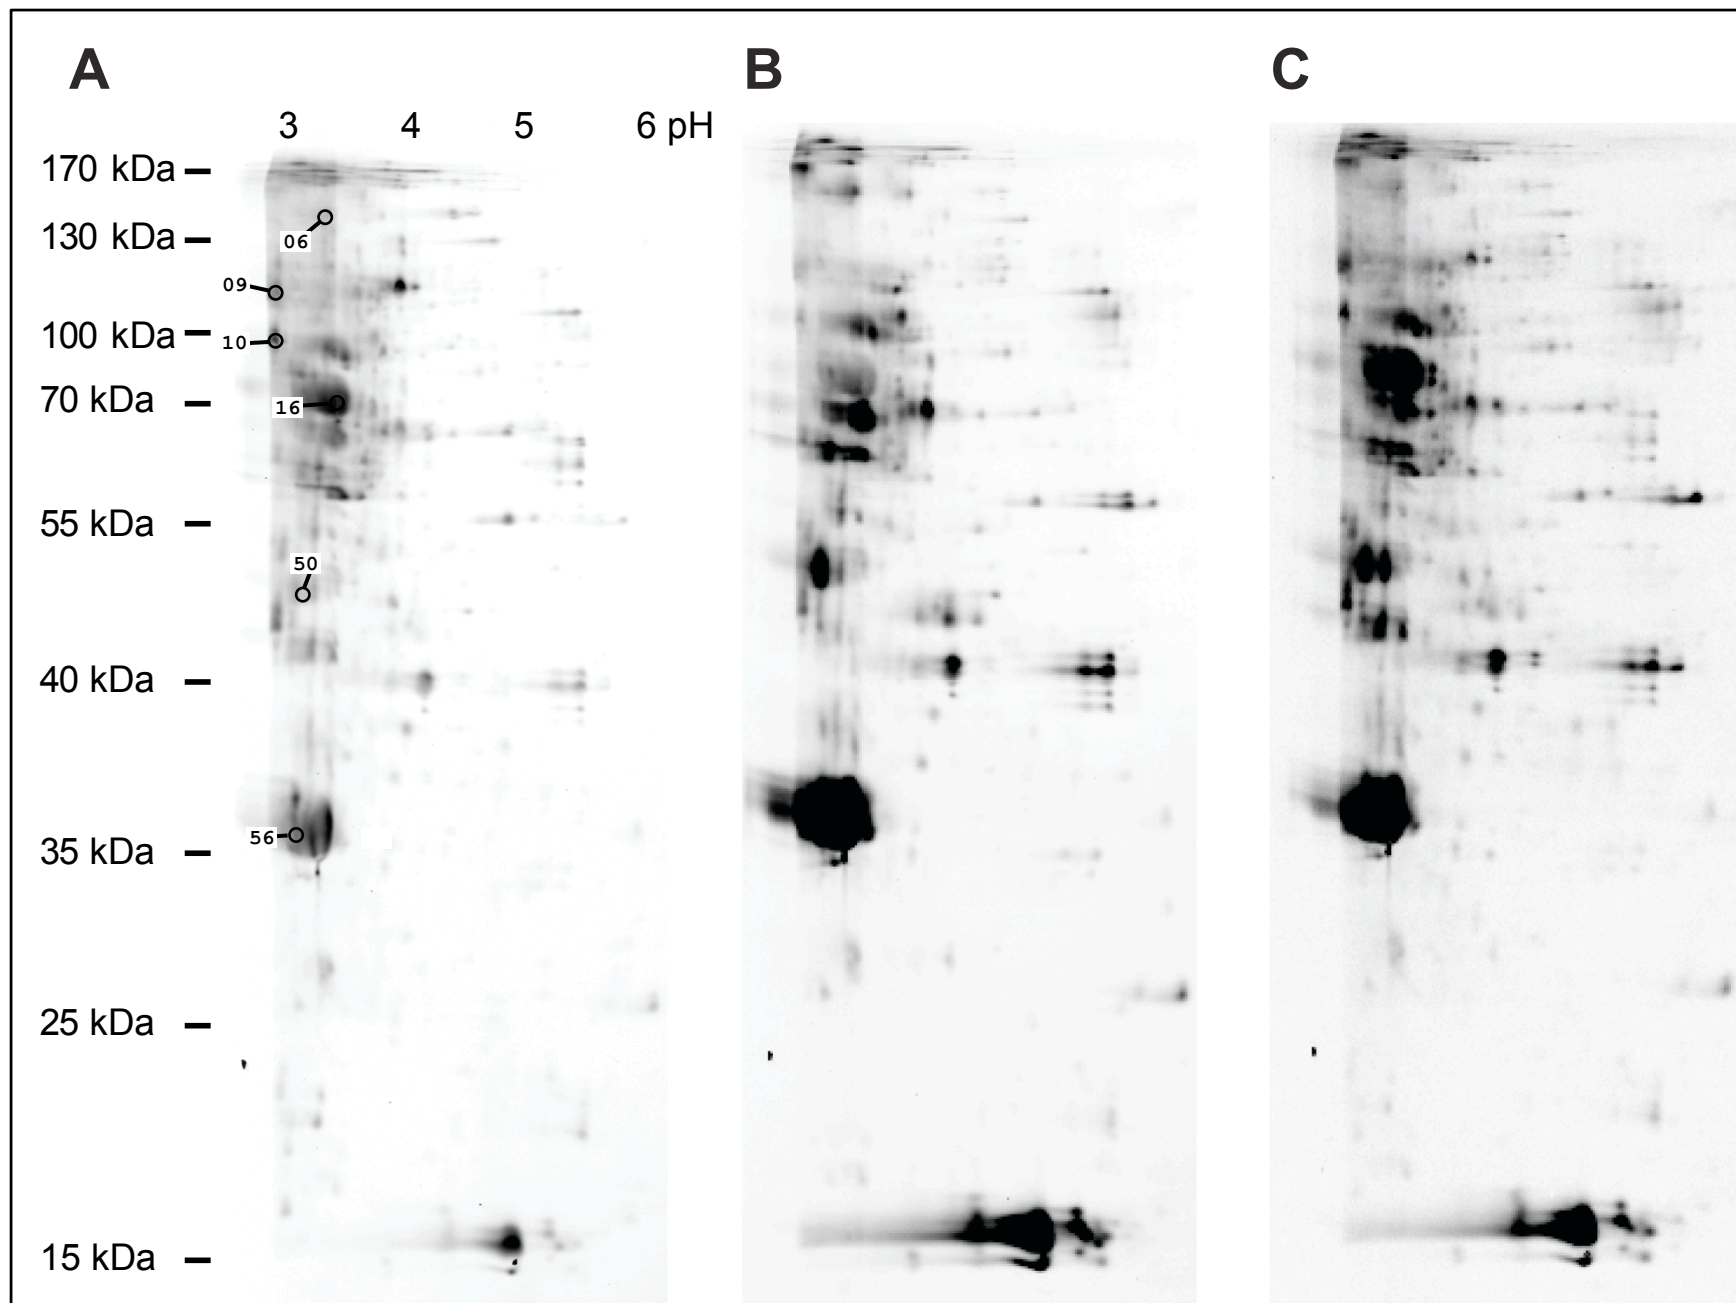

**Supplement Figure 3**

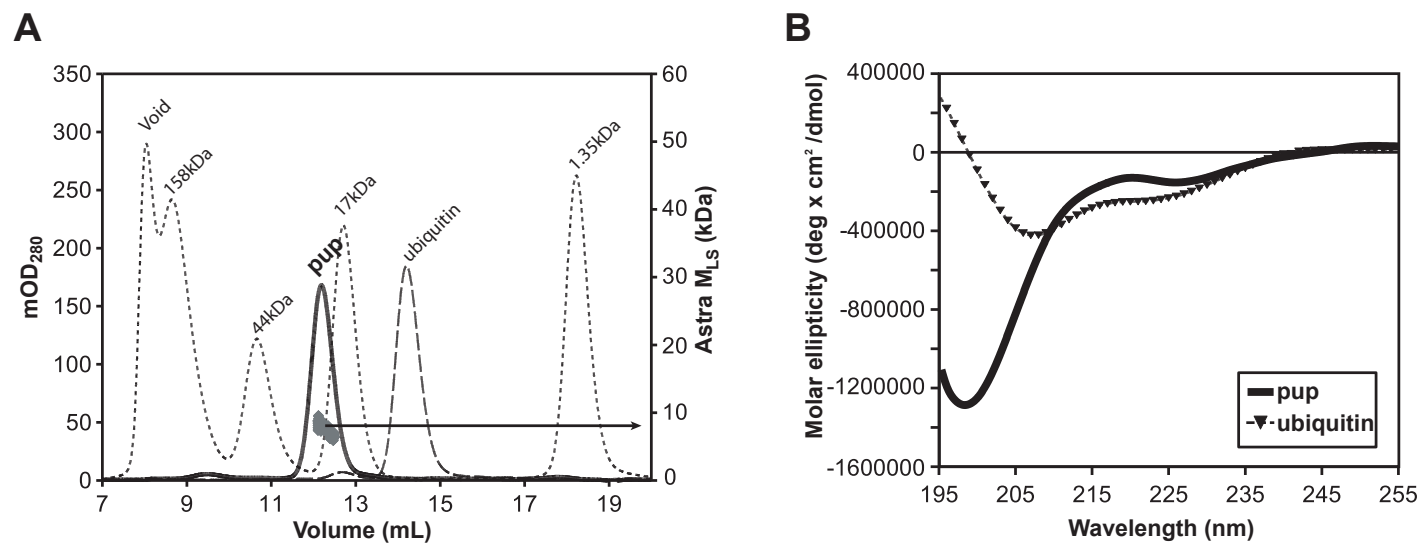

Supplement Figure 4

Supplement: msb201039-s1.pdf [file msb201039-s1.pdf]
